# Supplementary material for: A C–H functionalization approach to diverse nitrogenous scaffolds through conjugate addition of catalytic allyliron nucleophiles
Source: Royal Society of Chemistry journal article supplement (doi:10.1039/d4sc00655k), 2024-01-01
Supplement: d4sc00655k1.pdf [file d4sc00655k1.pdf]

SUPPORTING INFORMATION *for*

A C–H Functionalization Approach to Diverse Nitrogenous Scaffolds Through Conjugate Addition of Catalytic Allyliron Nucleophiles

Sarah G. Scrivener,<sup>a</sup> and Yi-Ming Wang<sup>a\*</sup>

<sup>a</sup>*Department of Chemistry, University of Pittsburgh, Pittsburgh, PA 15260*

## Contents

|                                                                                                           |     |
|-----------------------------------------------------------------------------------------------------------|-----|
| General Information .....                                                                                 | 3   |
| 1. General procedures .....                                                                               | 4   |
| 2. Characterization data.....                                                                             | 7   |
| 2.1 Synthesis of Michael adducts from Fe-catalyzed Michael addition – Maleimides .....                    | 7   |
| 2.1.1 Gram Scale Synthesis.....                                                                           | 14  |
| 2.2 Synthesis of Michael adducts from Fe-catalyzed Michael addition – Oxazolidinones .....                | 15  |
| 2.3 Synthesis of Michael adducts from Fe-catalyzed Michael addition – Phthalimides .....                  | 18  |
| 2.4 Synthesis of Michael adducts from Fe-catalyzed Michael addition – Sulfonamides .....                  | 26  |
| 2.5 Synthesis of Michael acceptor substrates .....                                                        | 31  |
| 2.5.1 Maleimide Michael Acceptors.....                                                                    | 31  |
| 2.5.2 <i>N</i> -Acyl oxazolidinone Michael Acceptors .....                                                | 32  |
| 2.5.3 Phthalimide protected Michael Acceptors .....                                                       | 32  |
| 2.5.4 Sulfonamide protected Michael Acceptors:.....                                                       | 32  |
| 2.6 Synthesis of alkene substrates .....                                                                  | 34  |
| 3. Synthetic applications of products .....                                                               | 35  |
| 4. Assignment of diastereomers .....                                                                      | 39  |
| 4.1 Assignment for succinimide products 3 by X-ray crystallography .....                                  | 39  |
| 4.2 Assignment for $\beta$ -aminoketones products 7 and 9 by nOe experiments and multiplet analysis ..... | 41  |
| 4.3 Assignment for oxazolidinone products 5 by chemical correlation with known diol .....                 | 44  |
| 5. Reaction optimization .....                                                                            | 47  |
| 5.1 Optimization of Maleimide Michael Acceptors .....                                                     | 47  |
| 5.2 Optimization of <i>N</i> -Acyl-Oxazolidinone Michael Acceptors .....                                  | 51  |
| 5.3 Optimization of Phthalimide Michael Acceptors .....                                                   | 54  |
| 5.4 Optimization of Sulfonimide Michael Acceptors .....                                                   | 55  |
| 6. Unsuccessful substrates.....                                                                           | 56  |
| 7. Copies of NMR spectra of products and substrates.....                                                  | 57  |
| 7.1 NMR spectra: Maleimide Scope.....                                                                     | 57  |
| 7.2 NMR spectra: Oxazolidinone Scope .....                                                                | 106 |
| 7.3 NMR spectra: Phthalimide Scope.....                                                                   | 124 |
| 7.4 NMR spectra: Sulfonamide Scope.....                                                                   | 167 |
| 7.5 NMR spectra of starting materials .....                                                               | 183 |
| 7.6 NMR spectra of synthetic application of products .....                                                | 191 |
| 7.7 Derivatization for <i>N</i> -Acyl oxazolidinone diastereomer assignments .....                        | 203 |
| 8. References.....                                                                                        | 206 |

## General Information

**General Reagent Information:** Anhydrous tetrahydrofuran (THF), 1,2-dichloroethane (DCE), toluene and trifluorotoluene were purchased from Acros (AcroSeal packaging), Sigma Aldrich (Sure/Seal packaging), and Frontier Scientific (J&KSeal packaging), respectively, and were deoxygenated by sparging with nitrogen and transferred into an argon-filled glovebox. Other dry solvents were obtained by distillation and storage over 3Å or 4Å molecular sieves. All other reagents were purchased from Oakwood, Acros, TCI, Strem, Alfa Aesar, or Sigma Aldrich and used as received. 2,2,6,6-Tetramethylpiperidine (TMPH) was purified by short-path vacuum distillation. Cationic iron complex  $[\text{Cp}^*\text{Fe}(\text{CO})_2(\text{thf})]^+[\text{BF}_4]^-$  was prepared according to literature procedure.<sup>1</sup> Air sensitive reagents and the iron catalyst (including  $\text{BF}_3 \cdot \text{Et}_2\text{O}$ , TMPH, silyl triflates, and bistriflimide salts) were stored in the glovebox. Compounds were purified by flash column chromatography using SiliCycle *SiliaFlash*® F60 silica gel, unless otherwise indicated.

**General Analytical Information:** New compounds were characterized by  $^1\text{H}$  NMR,  $^{13}\text{C}$  NMR and HRMS. Copies of the  $^1\text{H}$  NMR and  $^{13}\text{C}$  NMR spectra can be found at the end of the Supporting Information.  $^1\text{H}$  and  $^{13}\text{C}$  NMR spectra were recorded on Bruker 300 MHz, 400 MHz, or 500 MHz instruments. All  $^1\text{H}$  NMR data are reported in  $\delta$  units, parts per million (ppm), and were measured relative to the residual proton signal in the deuterated solvent at 7.26 ppm ( $\text{CDCl}_3$ ). Throughout analysis of diastereomeric mixtures, H\* indicates the major diastereomer, while H' indicates the minor diastereomer. All  $^{13}\text{C}$  NMR spectra are  $^1\text{H}$  decoupled and reported in ppm relative to the solvent signal at 77.16 ppm ( $\text{CDCl}_3$ ). Thin-layer chromatography (TLC) was performed on Silicycle 250  $\mu\text{m}$  (analytical) or 1000  $\mu\text{m}$  (preparative) silica gel plates. Compounds were visualized by irradiation with UV light, or by staining with potassium permanganate. Yields refer to isolated compounds, unless otherwise indicated. High resolution mass spectra were recorded on a Thermo Scientific Q-Exactive mass spectrometer. NMR yield was determined by using 2,4-dinitrotoluene as internal standard for  $^1\text{H}$  spectroscopy.

## 1. General procedures

**General procedure A** for the addition of alkenes to maleimide Michael acceptors

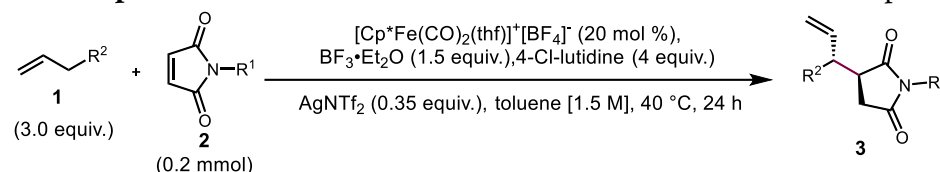

A reaction tube (13 mm × 100 mm, Fisherbrand, part # 14-959-35C) equipped with an olive shaped magnetic stir bar (10 mm) was capped with a Teflon/silicone septum (Thermo/National part # C4015-66A) screw cap and flame dried under vacuum and transferred into an argon-filled glovebox. In the glovebox were added Michael acceptor (**2**, 0.2 mmol, 1.0 equiv),  $\text{AgNTf}_2$  (0.07 mmol, 27.7mg, 0.35 equiv), and  $[\text{Cp}^*\text{Fe}(\text{CO})_2(\text{thf})]^+[\text{BF}_4]^-$  (20 mol %, 16.8 mg). Dry toluene (0.13 mL, 1.5 M), was added and the solution was briefly stirred. Then alkene (**1**, 0.9 mmol, 3.0 equiv),  $\text{BF}_3 \cdot \text{Et}_2\text{O}$  (0.3 mmol, 37  $\mu\text{L}$ , 1.5 equiv), and 4-chloro-2,6-lutidine (0.8 mmol, 103  $\mu\text{L}$ , 4.0 equiv) were sequentially added with brief stirring after each addition. The reaction tube was then removed from the glovebox and placed in an oil bath at 40 °C for 24 h at 400 rpm. After completion of the reaction, the reaction mixture was cooled to room temperature and filtered through a silica plug (2 mL) using ethyl acetate (10 mL). The diastereomeric ratio (d.r.) was then determined by  $^1\text{H}$  NMR analysis of a portion of the filtrate. The crude mixture was concentrated *in vacuo*. After concentration *in vacuo*, the crude mixture was purified by flash column chromatography to provide the desired product. The stereochemical outcome was assigned by analogy to the relative configuration of a crystal grown from a diastereomerically-enriched sample of **3fc**. The major diastereomer was determined to be the ( $R^*$ ,  $R^*$ ) configuration.

**General procedure B** for the addition of alkenes to *N*-acyl oxazolidinone Michael acceptors

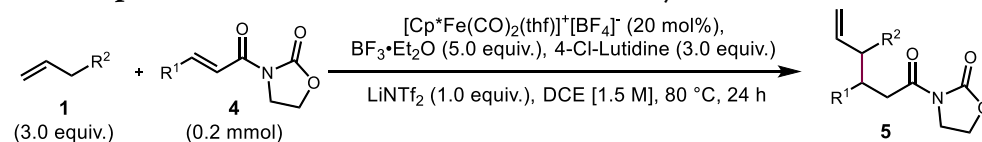

A reaction tube (13 mm × 100 mm, Fisherbrand, part # 14-959-35C) equipped with an olive shaped magnetic stir bar (10 mm) was capped with a Teflon/silicone septum (Thermo/National part # C4015-66A) screw cap and flame dried under vacuum and transferred into an argon-filled glovebox. In the glovebox were added Michael acceptor (**4**, 0.2 mmol, 1.0 equiv),  $\text{LiNTf}_2$  (0.2 mmol, 57.4 mg, 1.0 equiv), and  $[\text{Cp}^*\text{Fe}(\text{CO})_2(\text{thf})]^+[\text{BF}_4]^-$  (20 mol %, 16.8 mg). Dry DCE (0.13 mL, 1.5 M), was added and the solution was briefly stirred. Then alkene (**1**, 0.9 mmol, 3.0 equiv),  $\text{BF}_3 \cdot \text{Et}_2\text{O}$  (1.0 mmol, 125  $\mu\text{L}$ , 5.0 equiv), and 4-chloro-2,6-lutidine (0.6 mmol, 77  $\mu\text{L}$ , 3.0 equiv) were sequentially added with brief stirring after each addition. The reaction tube was then removed from the glovebox and placed in an oil bath at 80 °C for 24 h at 400 rpm. After completion of the reaction, the reaction mixture was cooled to room temperature and filtered through a silica plug (2 mL) using ethyl acetate (10 mL). The diastereomeric ratio (d.r.) was then determined by  $^1\text{H}$  NMR analysis of a portion of the filtrate. The crude mixture was concentrated *in vacuo*. After concentration *in vacuo*, the crude mixture was purified by flash column chromatography to provide the desired product.

**General procedure C** for the addition of activated alkenes to  $\beta$ -phthalimido Michael acceptors



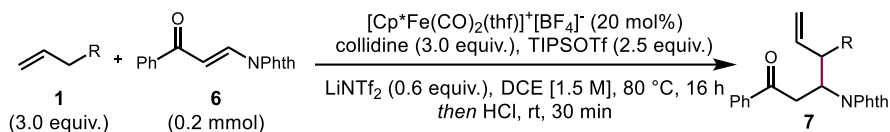

A reaction tube (13 mm × 100 mm, Fisherbrand, part # 14-959-35C) equipped with an olive shaped magnetic stir bar (10 mm) was capped with a Teflon/silicone septum (Thermo/National part # C4015-66A) screw cap and flame dried under vacuum and transferred into an argon-filled glovebox. In the glovebox were added Michael acceptor (**6**, 0.3 mmol, 1.0 equiv),  $\text{LiNTf}_2$  (0.12 mmol, 34.4 mg, 0.6 equiv), and  $[\text{Cp}^*\text{Fe}(\text{CO})_2(\text{thf})]^+[\text{BF}_4]^-$  (20 mol %, 16.8 mg). Dry DCE (0.13 mL, 1.5 M), was added and the solution was briefly stirred. Then alkene (**1**, 0.9 mmol, 3.0 equiv), TIPSOTf (0.5 mmol, 134  $\mu\text{L}$ , 2.5 equiv), and 2,4,6-collidine (0.6 mmol, 75  $\mu\text{L}$ , 3.0 equiv) were sequentially added with brief stirring after each addition. The reaction tube was then removed from the glovebox and placed in an oil bath at 80 °C for 16 h at 400 rpm. After completion of the reaction, the reaction mixture was cooled to room temperature and filtered through a silica plug (2 mL) using ethyl acetate (10 mL). 4N HCl in dioxane (0.4 mmol, 100  $\mu\text{L}$ , 2.0 equiv) was added at room temperature and the mixture was stirred for 30 min at room temperature. The crude mixture was concentrated *in vacuo*. After concentration *in vacuo*, the crude mixture was purified by flash column chromatography to provide the desired product.

**General procedure D** for the addition of unactivated alkenes to  $\beta$ -phthalimido Michael acceptors

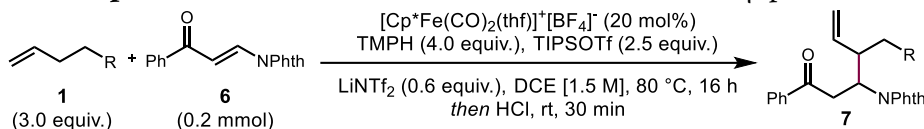

A reaction tube (13 mm × 100 mm, Fisherbrand, part # 14-959-35C) equipped with an olive shaped magnetic stir bar (10 mm) was capped with a Teflon/silicone septum (Thermo/National part # C4015-66A) screw cap and flame dried under vacuum and transferred into an argon-filled glovebox. In the glovebox were added Michael acceptor (**6**, 0.2 mmol, 1.0 equiv),  $\text{LiNTf}_2$  (0.12 mmol, 34.4 mg, 0.6 equiv), and  $[\text{Cp}^*\text{Fe}(\text{CO})_2(\text{thf})]^+[\text{BF}_4]^-$  (20 mol %, 16.8 mg). Dry DCE (0.13 mL, 1.5 M), was added and the solution was briefly stirred. Then alkene (**1**, 0.9 mmol, 3.0 equiv), TIPSOTf (0.5 mmol, 134  $\mu\text{L}$ , 2.5 equiv), and TMPH (0.8 mmol, 136  $\mu\text{L}$ , 4.0 equiv) were sequentially added with brief stirring after each addition. The reaction tube was then removed from the glovebox and placed in an oil bath at 80 °C for 16 h at 400 rpm. After completion of the reaction, the reaction mixture was cooled to room temperature and filtered through a silica plug (2 mL) using ethyl acetate (10 mL). 4N HCl in dioxane (0.4 mmol, 100  $\mu\text{L}$ , 2.0 equiv) was added at room temperature and the mixture was stirred for 30 min at room temperature. The crude mixture was concentrated *in vacuo*. After concentration *in vacuo*, the crude mixture was purified by flash column chromatography to provide the desired product.

**General procedure E** for the addition of alkenes to  $\beta$ -sulfonamido Michael acceptors

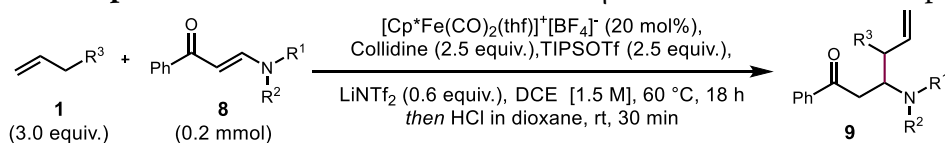

A reaction tube (13 mm × 100 mm, Fisherbrand, part # 14-959-35C) equipped with an olive shaped magnetic stir bar (10 mm) was capped with a Teflon/silicone septum (Thermo/National part # C4015-66A) screw cap and flame dried under vacuum and transferred into an argon-filled glovebox. In the

glovebox were added Michael acceptor (**8**, 0.2 mmol, 1.0 equiv), LiNTf<sub>2</sub> (0.12 mmol, 34.4 mg, 0.6 equiv), and [Cp\*Fe(CO)<sub>2</sub>(thf)]<sup>+</sup>[BF<sub>4</sub>]<sup>-</sup> (20 mol %, 16.8 mg). Dry DCE (0.13 mL, 1.5 M), was added and the solution was briefly stirred. Then alkene (**1**, 0.9 mmol, 3.0 equiv), TIPSOTf (0.5 mmol, 134 μL, 2.5 equiv), and collidine (0.5 mmol, 66 μL, 2.5 equiv) were sequentially added with brief stirring after each addition. The reaction tube was then removed from the glovebox and placed in an oil bath at 60 °C for 18 h at 400 rpm. After completion of the reaction, the reaction mixture was cooled to room temperature and filtered through a silica plug (2 mL) using ethyl acetate (10 mL). 4N HCl in dioxane (0.4 mmol, 100 μL, 2.0 equiv) was added at room temperature and the mixture was stirred for 30 min at room temperature. The crude mixture was concentrated *in vacuo*. After concentration *in vacuo*, the crude mixture was purified by flash column chromatography to provide the desired product.

## 2. Characterization data

### 2.1 Synthesis of Michael adducts from Fe-catalyzed Michael addition – Maleimides

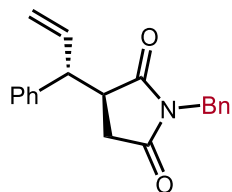

**1-Benzyl-3-(1-phenylallyl)pyrrolidine-2,5-dione (3aa):** (SGS-5-192) Prepared following **General procedure A** using 1-benzyl-1*H*-pyrrole-2,5-dione (**2a**, 37.4 mg, 0.2 mmol, 1.0 equiv) and allylbenzene (**1a**, 79  $\mu$ L, 0.6 mmol, 3.0 equiv). The reaction mixture was heated at 40 °C for 24 h. The crude reaction mixture was purified by flash column chromatography (hexanes/ethyl acetate = 20:1) to afford the title compound as a yellow oil (54.5 mg, 89%, 7.6:1 d.r.).

**<sup>1</sup>H NMR** (500 MHz, CDCl<sub>3</sub>)  $\delta$  7.36 – 7.27 (m, 1H\*+1H'), 7.25 – 7.06 (m, 9H\*+9H'), 6.11 (ddd,  $J$  = 17.0, 10.4, 6.4 Hz, 1H\*), 5.98 – 5.89 (m, 1H'), 5.29 – 5.05 (m, 2H\*+2H'), 4.62 (s, 2H'), 4.51 (s, 2H\*), 4.14 – 4.06 (m, 1H\*), 4.03 – 3.98 (m, 1H'), 3.37 – 3.25 (m, 1H\*+1H'), 2.77 – 2.61 (m, 1H\*+2H'), 2.51 (dd,  $J$  = 18.4, 4.4 Hz, 1H\*). Throughout analysis of diastereomeric mixtures, H\* indicates the major diastereomer, while H' indicates the minor diastereomer.

**<sup>13</sup>C NMR** (126 MHz, CDCl<sub>3</sub>)  $\delta$  178.4, 175.9, 138.2, 138.0, 135.6, 134.8, 129.0<sub>1</sub>, 128.9<sub>9</sub>, 128.8<sub>5</sub>, 128.8, 128.7, 128.6, 128.0, 127.9, 127.8, 127.6, 119.6, 116.6, 49.3, 48.6, 45.3, 44.0, 42.6, 42.4, 31.4, 29.8. Six peaks missing due to overlap and low intensity of minor diastereomer.

**HRMS** (ESI) calcd for C<sub>20</sub>H<sub>20</sub>NO<sub>2</sub> [M+H]<sup>+</sup>: 306.14886, found: 306.14831.

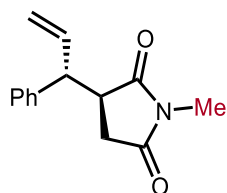

**1-Methyl-3-(1-phenylallyl)pyrrolidine-2,5-dione (3ba):** (SGS-6-34) Prepared following **General procedure A** using 1-methyl-1*H*-pyrrole-2,5-dione (**2b**, 22.2 mg, 0.2 mmol, 1.0 equiv) and allylbenzene (**1a**, 79  $\mu$ L, 0.6 mmol, 3.0 equiv). The reaction mixture was heated at 40 °C for 24 h. The crude reaction mixture was purified by flash column chromatography (hexanes/ethyl acetate = 20:1) to afford the title compound as a yellow oil (26.4 mg, 58%, 3.9:1 d.r.).

**<sup>1</sup>H NMR** (500 MHz, CDCl<sub>3</sub>)  $\delta$  7.36 – 7.31 (m, 2H'), 7.31 – 7.19 (m, 3H\*+3H'), 7.18 – 7.11 (m, 2H\*), 6.15 (ddd,  $J$  = 17.1, 10.5, 6.4 Hz, 1H\*), 5.99 (ddd,  $J$  = 17.0, 10.2, 8.5 Hz, 1H'), 5.29 – 5.10 (m, 2H\*+2H'), 4.10 – 4.01 (m, 1H\*+1H'), 3.35 – 3.25 (m, 1H\*+1H'), 2.95 (s, 3H'), 2.81 (s, 3H\*), 2.75 – 2.65 (m, 1H\*+2H'), 2.48 (dd,  $J$  = 18.3, 4.3 Hz, 1H\*).

**<sup>13</sup>C NMR** (126 MHz, CDCl<sub>3</sub>)  $\delta$  178.8, 178.6, 176.5, 176.3, 140.4, 138.4, 137.9, 134.9, 129.0, 128.8, 128.7, 127.8, 127.7, 127.3, 119.6, 116.6, 49.2, 48.8, 45.5, 44.1, 31.5, 31.3, 24.9, 24.7.

**HRMS** (ESI) calcd for C<sub>14</sub>H<sub>16</sub>NO<sub>2</sub> [M+H]<sup>+</sup>: 230.11756, found: 230.11781.

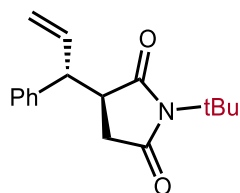

**1-(Tert-butyl)-3-(1-phenylallyl)pyrrolidine-2,5-dione (3ca):** (SGS-6-35) Prepared following **General procedure A** using 1-(tert-butyl)-1*H*-pyrrole-2,5-dione (**2c**, 30.6 mg, 0.2 mmol, 1.0 equiv) and allylbenzene (**1a**, 79  $\mu$ L, 0.6 mmol, 3.0 equiv). The reaction mixture was heated at 40 °C for 24 h. The crude reaction mixture was purified by flash column chromatography (hexanes/ethyl acetate = 20:1) to afford the title compound as a yellow oil (37.1 mg, 68%, 6.8:1 d.r.).

<sup>1</sup>H NMR (500 MHz, CDCl<sub>3</sub>)  $\delta$  7.36 – 7.14 (m, 5H\*+5H'), 6.11 (ddd,  $J$  = 17.0, 10.5, 6.2 Hz, 1H\*), 5.99 (ddd,  $J$  = 17.0, 10.3, 8.5 Hz, 1H'), 5.27 – 5.09 (m, 2H\*+2H'), 4.10 – 4.05 (m, 1H\*), 4.01 (dd,  $J$  = 8.4, 3.9 Hz, 1H'), 3.18 – 3.08 (m, 1H\*+1H'), 2.64 – 2.50 (m, 1H\*+2H'), 2.41 (dd,  $J$  = 18.2, 4.3 Hz, 1H\*), 1.54 (s, 9H'), 1.38 (s, 9H\*).

<sup>13</sup>C NMR (126 MHz, CDCl<sub>3</sub>)  $\delta$  179.9, 179.7, 177.6, 177.4, 140.7, 138.3, 138.2, 134.9, 129.0, 128.9, 128.8, 127.8, 127.6, 127.2, 119.5, 116.4, 58.6, 58.4, 49.5, 48.9, 45.0, 43.8, 31.9, 31.7, 28.5, 28.3.

**HRMS** (ESI) calcd for C<sub>17</sub>H<sub>22</sub>NO<sub>2</sub> [M+H]<sup>+</sup>: 272.16451, found: 272.16487.

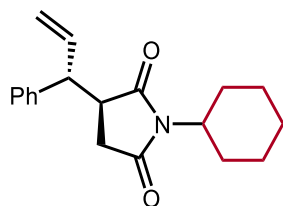

**1-Cyclohexyl-3-(1-phenylallyl)pyrrolidine-2,5-dione (3da):** (SGS-6-24) Prepared following **General procedure A** using 1-cyclohexyl-1*H*-pyrrole-2,5-dione (**2d**, 35.8 mg, 0.2 mmol, 1.0 equiv) and allylbenzene (**1a**, 79  $\mu$ L, 0.6 mmol, 3.0 equiv). The reaction mixture was heated at 40 °C for 24 h. The crude reaction mixture was purified by flash column chromatography (hexanes/ethyl acetate = 20:1) to afford the title compound as a yellow oil (40.9 mg, 82%, 6.8:1 d.r.).

<sup>1</sup>H NMR (500 MHz, CDCl<sub>3</sub>)  $\delta$  7.36 – 7.12 (m, 5H\*+5H'), 6.12 (ddd,  $J$  = 17.0, 10.5, 6.2 Hz, 1H\*), 5.98 (ddd,  $J$  = 17.0, 10.2, 8.5 Hz, 1H'), 5.28 – 5.09 (m, 2H\*+2H'), 4.15 – 4.08 (m, 1H\*), 4.02 (dd,  $J$  = 8.5, 3.9 Hz, 1H'), 3.94 (tt,  $J$  = 12.4, 3.9 Hz, 1H'), 3.78 (tt,  $J$  = 12.4, 3.8 Hz, 1H\*), 3.26 – 3.15 (m, 1H\*+1H'), 2.70 – 2.61 (m, 1H\*+1H'), 2.58 (dd,  $J$  = 18.4, 4.7 Hz, 1H'), 2.45 (dd,  $J$  = 18.4, 4.1 Hz, 1H\*), 2.17 – 1.49 (m, 6H\*+6H'), 1.34 – 1.08 (m, 4H\*+4H').

<sup>13</sup>C NMR (126 MHz, CDCl<sub>3</sub>)  $\delta$  178.9, 178.7, 176.6, 176.4, 140.6, 138.2, 138.0, 134.8, 128.9, 128.8, 127.8, 127.6, 127.2, 119.5, 116.4, 51.9, 51.7, 49.3, 48.7, 44.8, 43.4, 31.2, 31.1, 29.0, 28.8, 28.7, 28.6, 26.0, 25.9, 25.2, 25.1. Three peaks missing due to overlap.

**HRMS** (ESI) calcd for C<sub>19</sub>H<sub>24</sub>NO<sub>2</sub> [M+H]<sup>+</sup>: 298.18016, found: 298.18073.

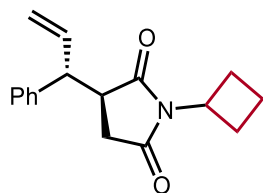

**1-Cyclobutyl-3-(1-phenylallyl)pyrrolidine-2,5-dione (3ea)** (SGS-6-44) Prepared following **General procedure A** using 1-cyclobutyl-1*H*-pyrrole-2,5-dione (**2e**, 30.2 mg, 0.2 mmol, 1.0 equiv) and allylbenzene (**1a**, 79  $\mu$ L, 0.6 mmol, 3.0 equiv). The reaction mixture was heated at 40 °C for 24 h. The crude reaction mixture was purified by flash column chromatography (hexanes/ethyl acetate = 20:1) to afford the title compound as a yellow oil (45.4 mg, 84%, 6.1:1 d.r.).

**<sup>1</sup>H NMR** (500 MHz, CDCl<sub>3</sub>)  $\delta$  7.36 – 7.11 (m, 5H\*+5H'), 6.13 (ddd, *J* = 16.9, 10.5, 6.2 Hz, 1H\*), 5.98 (ddd, *J* = 17.1, 10.2, 8.6 Hz, 1H'), 5.32 – 5.06 (m, 2H\*+2H'), 4.55 (p, *J* = 9.0 Hz, 1H'), 4.40 (p, *J* = 8.9 Hz, 1H\*), 4.11 – 4.04 (m, 1H\*), 4.01 (dd, *J* = 8.3, 3.9 Hz, 1H'), 3.28 – 3.14 (m, 1H\*+1H'), 2.86 – 2.75 (m, 2H'), 2.73 – 2.52 (m, 3H\*+2H'), 2.43 (dd, *J* = 18.3, 4.1 Hz, 1H\*), 2.15 – 2.06 (m, 2H'), 2.03 – 1.93 (m, 2H\*+1H'), 1.90 – 1.56 (m, 2H\*+2H').

**<sup>13</sup>C NMR** (126 MHz, CDCl<sub>3</sub>)  $\delta$  179.1, 178.8, 176.6, 176.4, 140.5, 138.2, 138.0, 135.0, 128.9, 128.8, 127.8, 127.6, 127.3, 119.4, 116.5, 49.4, 48.8, 45.5, 45.3, 44.8, 43.5, 31.3, 26.6, 26.5, 26.3, 15.5, 15.4. Three peaks missing due to overlap.

**HRMS** (ESI) calcd for C<sub>17</sub>H<sub>20</sub>NO<sub>2</sub> [M+H]<sup>+</sup>: 270.14886, found: 270.14832.

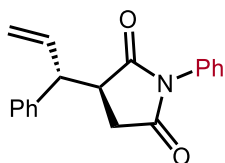

**1-Phenyl-3-(1-phenylallyl)pyrrolidine-2,5-dione (3fa)**: (SGS-6-27) Prepared following **General procedure A** using 1-phenyl-1*H*-pyrrole-2,5-dione (**2f**, 34.6 mg, 0.2 mmol, 1.0 equiv) and allylbenzene (**1a**, 79  $\mu$ L, 0.6 mmol, 3.0 equiv). The reaction mixture was heated at 40 °C for 24 h. The crude reaction mixture was purified by flash column chromatography (hexanes/ethyl acetate = 20:1) to afford the title compound as a yellow oil (44.1 mg, 75%, 3.8:1 d.r.).

**<sup>1</sup>H NMR** (500 MHz, CDCl<sub>3</sub>)  $\delta$  7.45 (t, *J* = 7.7 Hz, 2H'), 7.42 – 7.16 (m, 8H\*+8H'), 6.94 (d, *J* = 7.6 Hz, 2H\*), 6.22 – 6.09 (m, 1H\*+1H'), 5.36 – 5.10 (m, 2H\*+2H'), 4.27 – 4.22 (m, 1H\*), 4.13 (dd, *J* = 8.6, 3.8 Hz, 1H'), 3.56 – 3.42 (m, 1H\*+1H'), 2.95 – 2.77 (m, 1H\*+2H'), 2.71 (dd, *J* = 18.5, 4.0 Hz, 1H\*).

**<sup>13</sup>C NMR** (126 MHz, CDCl<sub>3</sub>)  $\delta$  177.9, 177.6, 175.4, 175.3, 140.2, 138.0, 137.7, 134.8, 132.0, 131.8, 129.3, 129.2, 129.1, 129.0, 128.8, 128.8, 127.9, 127.8, 127.5, 126.6, 126.2, 119.9, 116.8, 49.6, 48.8, 45.5, 44.1, 31.5, 31.4. One peak missing due to overlap.

**HRMS** (ESI) calcd for C<sub>19</sub>H<sub>18</sub>NO<sub>2</sub> [M+H]<sup>+</sup>: 292.13321, found: 292.13279.

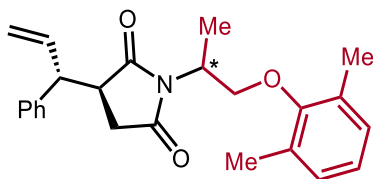

**1-(1-(2,6-Dimethylphenoxy)propan-2-yl)-3-(1-phenylallyl)pyrrolidine-2,5-dione (3ga)**: (SGS-6-65) Prepared following **General procedure A** using 1-(1-(2,6-dimethylphenoxy)propan-2-yl)-1*H*-pyrrole-2,5-dione (**2g**, 51.8 mg, 0.2 mmol, 1.0 equiv) and allylbenzene (**1a**, 79  $\mu$ L, 0.6 mmol, 3.0 equiv). The reaction mixture was heated at 40 °C for 24 h. The crude reaction mixture was purified by flash column chromatography (hexanes/ethyl acetate = 10:1) to afford the title compound as a yellow oil (57.3

mg, 76%, 5.3:1 d.r. with respect to the newly generated stereocenters, d.r. with respect to the stereocenter designated by \* could not be determined by <sup>1</sup>H NMR due to extensive signal overlap).

<sup>1</sup>H NMR (601 MHz, CDCl<sub>3</sub>) δ 7.37 – 7.11 (m, 5H\*+5H'), 7.00 – 6.94 (m, 2H\*+2H'), 6.92 – 6.87 (m, 1H\*+1H'), 6.20 – 6.09 (m, 1H\*), 6.07 – 5.97 (m, 1H'), 5.30 – 5.11 (m, 2H\*+2H'), 4.74 – 4.67 (m, 1H'), 4.59 – 4.51 (m, 1H\*), 4.30 (t, *J* = 9.3 Hz, 1H'), 4.16 – 4.04 (m, 2H\*+1H'), 3.81 – 3.75 (m, 1H'), 3.75 – 3.66 (m, 1H\*), 3.37 – 3.23 (m, 1H\*+1H'), 2.78 – 2.66 (m, 1H\*+2H'), 2.56 – 2.47 (m, 1H\*), 2.23 (s, 3H'), 2.21 (s, 3H'), 2.19 (s, 3H\*), 2.15 (s, 3H\*), 1.40 – 1.25 (m, 3H'), 1.24 – 1.13 (m, 3H\*).

<sup>13</sup>C NMR (151 MHz, CDCl<sub>3</sub>) δ 178.9, 178.7, 178.5, 176.6, 176.5, 176.4, 176.3, 155.5, 155.4, 155.2<sub>9</sub>, 155.2<sub>5</sub>, 140.6, 140.5, 138.5, 138.2, 138.0<sub>2</sub>, 137.9<sub>9</sub>, 135.0<sub>7</sub>, 134.9<sub>5</sub>, 130.8<sub>8</sub>, 130.8<sub>4</sub>, 130.8<sub>0</sub>, 128.9<sub>7</sub>, 128.9<sub>5</sub>, 128.9<sub>0</sub>, 128.8<sub>5</sub>, 128.8<sub>5</sub>, 128.7<sub>7</sub>, 127.9, 127.8, 127.7, 127.6, 127.3, 124.0<sub>9</sub>, 124.0<sub>7</sub>, 124.0<sub>5</sub>, 119.6<sub>2</sub>, 119.5<sub>6</sub>, 116.6, 116.5, 71.0<sub>3</sub>, 70.9<sub>6</sub>, 70.9, 70.7, 49.2<sub>7</sub>, 49.2<sub>5</sub>, 49.0, 48.6, 48.1, 48.0, 47.9, 47.8, 45.0, 44.9, 43.7, 43.6, 31.5, 31.4, 31.3, 31.2, 16.5, 16.4<sub>3</sub>, 16.3<sub>5</sub>, 16.3, 14.4, 14.3<sub>4</sub>, 14.3<sub>0</sub>, 14.2. (Complexity due to diastereomers originating from the stereocenter indicated by \*)

**HRMS** (ESI) calcd for C<sub>24</sub>H<sub>28</sub>NO<sub>3</sub> [M+H]<sup>+</sup>: 378.20637, found: 378.20631.

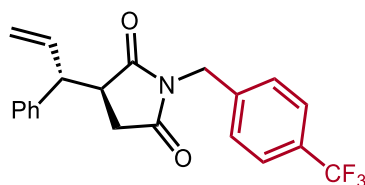

**3-(1-Phenylallyl)-1-(4-(trifluoromethyl)benzyl)pyrrolidine-2,5-dione (3ha):** (SGS-6-40)

Prepared following **General procedure A** using 1-(4-(trifluoromethyl)benzyl)-1*H*-pyrrole-2,5-dione (**2h**, 51.0 mg, 0.2 mmol, 1.0 equiv) and allylbenzene (**1a**, 79 μL, 0.6 mmol, 3.0 equiv). The reaction mixture was heated at 40 °C for 24 h. The crude reaction mixture was purified by flash column chromatography (hexanes/ethyl acetate = 20:1) to afford the title compound as a brown oil (48.8 mg, 65%, 7.0:1 d.r.).

<sup>1</sup>H NMR (500 MHz, CDCl<sub>3</sub>) δ 7.57 – 7.42 (m, 2H\*+2H'), 7.22 – 7.03 (m, 7H\*+7H'), 6.10 (ddd, *J* = 17.0, 10.5, 6.2 Hz, 1H\*), 5.96 (ddd, *J* = 17.1, 10.2, 8.6 Hz, 1H'), 5.31 – 5.06 (m, 2H\*+2H'), 4.66 (s, 2H'), 4.54 (s, 2H\*), 4.13 (dd, *J* = 6.0, 4.6 Hz, 1H\*), 3.99 (dd, *J* = 8.1, 4.4 Hz, 1H'), 3.37 (dt, *J* = 9.0, 4.4 Hz, 1H\*), 3.31 (dt, *J* = 9.0, 4.5 Hz, 1H'), 2.82 – 2.54 (m, 2H\*+2H').

<sup>13</sup>C NMR (151 MHz, CDCl<sub>3</sub>) δ 178.3, 178.0, 175.9, 175.8, 140.2, 139.6, 139.4, 137.8, 137.8, 134.8, 130.12 (q, *J* = 32.3 Hz), 129.3, 129.0, 128.9, 128.8<sub>2</sub>, 128.8<sub>1</sub>, 127.8, 127.7, 127.4, 125.65 (q, *J* = 4.0 Hz), 124.16 (q, *J* = 272.1 Hz), 119.6, 116.6, 49.4, 48.4, 45.3, 43.9, 42.0, 41.8, 31.4, 31.2. Three peaks missing due to overlap.

<sup>19</sup>F NMR (471 MHz, CDCl<sub>3</sub>) δ –62.66, –62.67.

**HRMS** (ESI) calcd for C<sub>21</sub>H<sub>19</sub>NO<sub>2</sub>F<sub>3</sub> [M+H]<sup>+</sup>: 374.13624, found: 374.13661.

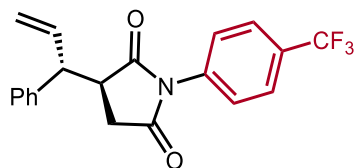

**3-(1-Phenylallyl)-1-(4-(trifluoromethyl)phenyl)pyrrolidine-2,5-dione (3ia):** (SGS-6-59) Prepared following **General procedure A** using 1-(4-(trifluoromethyl)phenyl)-1*H*-pyrrole-2,5-dione (**2i**, 48.2 mg, 0.2 mmol, 1.0 equiv) and allylbenzene (**1a**, 79 μL, 0.6 mmol, 3.0 equiv). The reaction mixture was heated

at 40 °C for 24 h. The crude reaction mixture was purified by flash column chromatography (hexanes/ethyl acetate = 5:1) to afford the title compound as a brown oil (60.0 mg, 84%, 3.5:1 d.r.).

<sup>1</sup>H NMR (500 MHz, CDCl<sub>3</sub>) δ 7.72 (d, *J* = 8.2 Hz, 2H'), 7.66 (d, *J* = 8.2 Hz, 2H\*), 7.41 – 7.24 (m, 3H\*+8H'), 7.21 (d, *J* = 7.3 Hz, 2H\*), 7.11 (d, *J* = 8.2 Hz, 2H\*), 6.26 – 6.07 (m, 1H\*+1H'), 5.41 – 5.14 (m, 2H\*+2H'), 4.24 (s, 1H\*), 4.13 (dd, *J* = 8.6, 3.7 Hz, 1H'), 3.59 – 3.45 (m, 1H\*+1H'), 2.98 – 2.88 (m, 1H\*+1H'), 2.84 (dd, *J* = 18.6, 4.5 Hz, 1H'), 2.76 (dd, *J* = 18.6, 3.8 Hz, 1H\*).

<sup>13</sup>C NMR (126 MHz, CDCl<sub>3</sub>) δ 177.5, 177.1, 174.9, 174.7, 139.9, 137.8, 137.5, 135.0, 134.9, 134.7, 130.7<sub>1</sub> (q, *J* = 33.2 Hz), 130.6<sub>8</sub> (q, *J* = 33.0 Hz), 129.1, 129.0, 128.9, 128.0, 127.8, 127.6, 126.8<sub>4</sub>, 126.8<sub>0</sub>, 126.4 – 126.2 (m), 123.8<sub>0</sub> (q, *J* = 271.9 Hz), 123.7<sub>7</sub> (q, *J* = 272.4 Hz), 120.0, 117.0, 49.7, 48.8, 45.5, 44.2, 31.6, 31.4.

<sup>19</sup>F NMR (471 MHz, CDCl<sub>3</sub>) δ –62.75, –62.78.

HRMS (ESI) calcd for C<sub>20</sub>H<sub>17</sub>NO<sub>2</sub>F<sub>3</sub> [M+H]<sup>+</sup>: 360.12059, found: 360.11995.

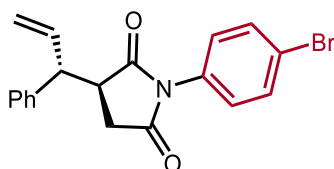

**1-(4-Bromophenyl)-3-(1-phenylallyl)pyrrolidine-2,5-dione (3ja):** (SGS-6-22) Prepared following **General procedure A** using 1-(4-bromophenyl)-1*H*-pyrrole-2,5-dione (**2j**, 50.4 mg, 0.2 mmol, 1.0 equiv) and allylbenzene (**1a**, 79 μL, 0.6 mmol, 3.0 equiv). The reaction mixture was heated at 40 °C for 24 h. The crude reaction mixture was purified by flash column chromatography (hexanes/ethyl acetate = 20:1) to afford the title compound as a brown solid (52.0 mg, 70%, 3.4:1 d.r.).

<sup>1</sup>H NMR (500 MHz, CDCl<sub>3</sub>) δ 7.60 – 7.57 (m, 2H'), 7.55 – 7.49 (m, 2H\*), 7.39 – 7.27 (m, 3H\*+6H'), 7.23 – 7.19 (m, 2H\*), 7.13 – 7.09 (m, 2H'), 6.87 – 6.82 (m, 2H\*), 6.23 – 6.08 (m, 1H\*+1H'), 5.37 – 5.16 (m, 2H\*+2H'), 4.23 (dd, *J* = 5.7, 4.5 Hz, 1H\*), 4.12 (dd, *J* = 8.6, 3.8 Hz, 1H'), 3.53 – 3.48 (m, 1H\*), 3.48 – 3.43 (m, 1H'), 2.95 – 2.86 (m, 1H\*+1H'), 2.82 (dd, *J* = 18.6, 4.6 Hz, 1H'), 2.73 (dd, *J* = 18.6, 3.9 Hz, 1H\*).

<sup>13</sup>C NMR (126 MHz, CDCl<sub>3</sub>) δ 177.6, 177.2, 175.0, 174.9, 137.9, 137.6, 134.7, 132.5, 132.4, 130.8, 129.1, 129.0, 128.9, 128.1<sub>0</sub>, 128.0<sub>8</sub>, 128.0, 127.8, 127.6, 122.7, 120.0, 116.9, 49.7, 48.8, 45.5, 44.2, 31.6, 31.4. Three peaks missing due to overlap and low intensity of minor diastereomer.

HRMS (ESI) calcd for C<sub>19</sub>H<sub>15</sub>NO<sub>2</sub>Br [M+H]<sup>+</sup>: 368.02807, found: 368.02870.

m.p. = 98 – 100 °C

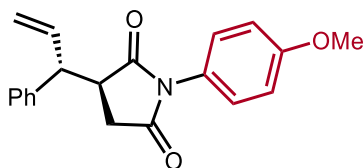

**1-(4-Methoxyphenyl)-3-(1-phenylallyl)pyrrolidine-2,5-dione (3ka):** (SGS-6-38) Prepared following **General procedure A** using 1-(4-methoxyphenyl)-1*H*-pyrrole-2,5-dione (**2k**, 40.1 mg, 0.2 mmol, 1.0 equiv) and allylbenzene (**1a**, 79 μL, 0.6 mmol, 3.0 equiv). The reaction mixture was heated at 40 °C for 24 h. The crude reaction mixture was purified by flash column chromatography (hexanes/ethyl acetate = 20:1) to afford the title compound as a yellow oil (43.7 mg, 68%, 3.4:1 d.r.).



<sup>1</sup>H NMR (500 MHz, CDCl<sub>3</sub>) δ 7.38 – 7.20 (m, 5H\*+5H'), 7.13 – 7.08 (m, 2H'), 6.98 – 6.04 (m, 2H'), 6.92 – 6.87 (m, 2H\*), 6.87 – 6.82 (m, 2H\*), 6.22 – 6.08 (m, 1H+1H'), 5.34 – 5.15 (m, 2H\*+2H'), 4.26 – 4.20 (m, 1H\*), 4.14 – 4.09 (m, 1H'), 3.81 (s, 3H'), 3.78 (s, 3H\*), 3.51 – 3.40 (m, 1H\*+1H'), 2.93 – 2.83 (m, 1H\*+1H'), 2.79 (dd, *J* = 18.5, 4.6 Hz, 1H'), 2.69 (dd, *J* = 18.5, 4.0 Hz, 1H\*).

<sup>13</sup>C NMR (126 MHz, CDCl<sub>3</sub>) δ 178.2, 177.8, 175.7, 175.5, 159.6<sub>8</sub>, 159.6<sub>5</sub>, 140.2, 138.0, 137.7, 134.8, 129.0, 129.0, 128.9, 127.9, 127.8, 127.4, 124.6, 124.4, 119.8, 116.7, 114.6<sub>2</sub>, 114.5<sub>6</sub>, 55.6<sub>0</sub>, 55.5<sub>6</sub>, 49.6, 48.7, 45.4, 44.1, 31.5, 31.3. One peak missing due to overlap.

HRMS (ESI) calcd for C<sub>20</sub>H<sub>20</sub>NO<sub>3</sub> [M+H]<sup>+</sup>: 322.14377, found: 322.14390.

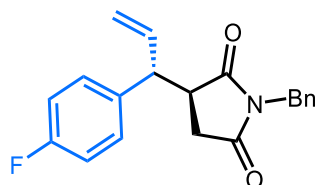

**1-Benzyl-3-(1-(4-fluorophenyl)allyl)pyrrolidine-2,5-dione (3ab):** (SGS-6-56)

Prepared following **General procedure A** using 1-benzyl-1*H*-pyrrole-2,5-dione (**2a**, 37.4 mg, 0.2 mmol, 1.0 equiv) and 4-fluoroallylbenzene (**1b**, 81 μL, 0.6 mmol, 3.0 equiv). The reaction mixture was heated at 40 °C for 24 h. The crude reaction mixture was purified by flash column chromatography (hexanes/ethyl acetate = 20:1) to afford the title compound as a brown oil (46.1 mg, 71%, 6.5:1 d.r.).

<sup>1</sup>H NMR (500 MHz, CDCl<sub>3</sub>) δ 7.27 – 7.21 (m, 3H\*+5H'), 7.16 – 7.10 (m, 2H\*+2H'), 7.05 – 6.99 (m, 2H\*), 6.96 (t, *J* = 8.6 Hz, 2H'), 6.81 (t, *J* = 8.6 Hz, 2H\*), 6.05 (ddd, *J* = 17.0, 10.5, 6.2 Hz, 1H\*), 5.92 (ddd, *J* = 17.0, 10.3, 8.4 Hz, 1H'), 5.29 – 5.04 (m, 2H\*+2H'), 4.64 – 4.45 (m, 2H\*+2H'), 4.11 (dd, *J* = 5.7, 4.5 Hz, 1H\*), 3.95 (dd, *J* = 8.2, 4.3 Hz, 1H'), 3.31 (dt, *J* = 8.9, 4.3 Hz, 1H\*), 3.24 (dt, *J* = 9.0, 4.5 Hz, 1H'), 2.79 – 2.69 2.60 (m, 1H\*+1H'), (dd, *J* = 18.4, 4.6 Hz, 1H'), 2.48 (dd, *J* = 18.5, 4.4 Hz, 1H\*).

<sup>13</sup>C NMR (126 MHz, CDCl<sub>3</sub>) δ 178.3, 175.8, 162.1 (d, *J* = 246.3 Hz), 137.6, 135.6, 135.0, 133.7 (d, *J* = 3.2 Hz), 130.3 (d, *J* = 8.1 Hz), 129.3 (d, *J* = 8.2 Hz), 129.0, 128.7 (d, *J* = 3.0 Hz), 128.1, 128.0, 119.5, 116.8, 115.9, 115.8, 115.6, 48.8, 47.6, 46.1, 45.2, 43.8, 42.4, 31.5, 31.1. Four peaks missing due to overlap.

<sup>19</sup>F NMR (471 MHz, CDCl<sub>3</sub>) δ -114.83, -115.33.

HRMS (ESI) calcd for C<sub>20</sub>H<sub>19</sub>NO<sub>2</sub>F [M+H]<sup>+</sup>: 324.13943, found: 324.13974.

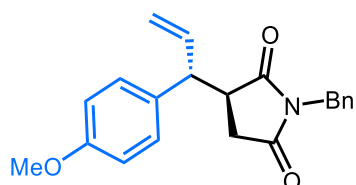

**1-Benzyl-3-(1-(4-methoxyphenyl)allyl)pyrrolidine-2,5-dione (3ac)** (SGS-6-46) Prepared following **General procedure A** using 1-benzyl-1*H*-pyrrole-2,5-dione (**2a**, 37.4 mg, 0.2 mmol, 1.0 equiv) and 4-methoxyallylbenzene (**1i**, 92 μL, 0.6 mmol, 3.0 equiv). The reaction mixture was heated at 40 °C for 24 h. The crude reaction mixture was purified by flash column chromatography (hexanes/ethyl acetate = 10:1) to afford the title compound as a yellow oil (60.8 mg, 90%, 6.2:1 d.r.).

<sup>1</sup>H NMR (500 MHz, CDCl<sub>3</sub>) δ 7.37 – 7.10 (m, 5H\*+5H'), 7.07 (d, *J* = 8.5 Hz, 2H'), 6.99 (d, *J* = 8.4 Hz, 2H\*), 6.81 (d, *J* = 8.5 Hz, 2H'), 6.68 (d, *J* = 8.5 Hz, 2H\*), 6.08 (ddd, *J* = 16.9, 10.4, 6.1 Hz, 1H\*), 5.98 – 5.89 (m, 1H'), 5.29 – 5.02 (m, 2H\*+2H'), 4.62 (s, 2H'), 4.51 (s, 2H\*), 4.12 – 4.07 (m, 1H\*), 3.93 (dd, *J*



= 7.6, 3.9 Hz, 1H'), 3.78 (s, 3H'), 3.75 (s, 3H\*), 3.35 – 3.22 (m, 1H\*+1H'), 2.77 – 2.59 (m, 1H\*+2H'), 2.51 (dd,  $J = 18.4, 4.3$  Hz, 1H\*).

$^{13}\text{C NMR}$  (126 MHz,  $\text{CDCl}_3$ )  $\delta$  178.6, 178.2, 176.0, 158.9, 158.7, 138.3, 135.8, 135.6, 135.4, 132.2, 129.9, 129.8, 129.0, 128.8, 128.7, 128.6, 128.0, 127.8, 119.1, 116.2, 114.3, 114.2, 55.4, 55.3, 48.7, 47.6, 45.4, 44.0, 42.5, 42.3, 31.5, 31.2. One peak missing due to overlap.

**HRMS** (ESI) calcd for  $\text{C}_{21}\text{H}_{22}\text{NO}_3$   $[\text{M}+\text{H}]^+$ : 336.15942, found: 336.15950.

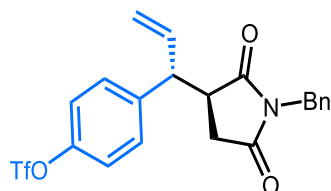

**4-(1-(1-Benzyl-2,5-dioxopyrrolidin-3-yl)allyl)phenyl trifluoromethanesulfonate (3ad)**: (SGS-6-54) Prepared following **General procedure A** using 1-benzyl-1*H*-pyrrole-2,5-dione (**2a**, 37.4 mg, 0.2 mmol, 1.0 equiv) and 4-allylphenyl trifluoromethanesulfonate (**1d**, 159.7 mg, 0.6 mmol, 3.0 equiv). The reaction mixture was heated at 40 °C for 24 h. The crude reaction mixture was purified by flash column chromatography (hexanes/ethyl acetate = 20:1) to afford the title compound as a brown oil (65.5 mg, 72%, 5.0:1 d.r.).

$^1\text{H NMR}$  (500 MHz,  $\text{CDCl}_3$ )  $\delta$  7.36 – 7.13 (m, 7H\*+9H'), 7.02 (d,  $J = 8.6$  Hz, 2H\*), 6.07 – 5.98 (m, 1H\*), 5.95 – 5.82 (m, 1H'), 5.36 – 5.06 (m, 2H\*+2H'), 4.62 (s, 2H'), 4.52 (q,  $J = 14.0$  Hz, 2H\*), 4.14 – 4.09 (m, 1H\*), 4.01 (dd,  $J = 8.1, 4.3$  Hz, 1H'), 3.34 (dt,  $J = 8.9, 4.3$  Hz, 1H\*), 3.26 (dt,  $J = 9.1, 4.5$  Hz, 1H'), 2.83 – 2.70 (m, 1H\*+1H'), 2.60 (dd,  $J = 18.4, 4.5$  Hz, 1H'), 2.43 (dd,  $J = 18.4, 4.4$  Hz, 1H\*).

$^{13}\text{C NMR}$  (151 MHz,  $\text{CDCl}_3$ )  $\delta$  178.0, 177.6, 175.5, 175.4, 148.7, 148.6, 141.0, 138.8, 136.7, 135.7, 135.6, 134.1, 130.6, 129.6, 129.1, 128.9, 128.8, 128.7, 128.2, 128.1, 121.9, 121.6, 120.3, 119.9, 48.8, 47.9, 44.9, 43.6, 42.7, 42.5, 31.4, 31.3.

$^{19}\text{F NMR}$  (471 MHz,  $\text{CDCl}_3$ )  $\delta$  -72.85, -72.93.

**HRMS** (ESI) calcd for  $\text{C}_{21}\text{H}_{19}\text{NO}_5\text{SF}_3$   $[\text{M}+\text{H}]^+$ : 454.09305, found: 454.09191.

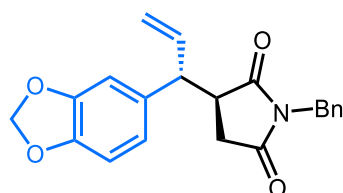

**3-(1-(Benzo[*d*][1,3]dioxol-5-yl)allyl)-1-benzylpyrrolidine-2,5-dione (3ae)**: (SGS-6-45) Prepared following **General procedure A** using 1-benzyl-1*H*-pyrrole-2,5-dione (**2a**, 37.4 mg, 0.2 mmol, 1.0 equiv) and safrole (**1e**, 89  $\mu\text{L}$ , 0.6 mmol, 3.0 equiv). The reaction mixture was heated at 40 °C for 24 h. The crude reaction mixture was purified by flash column chromatography (hexanes/ethyl acetate = 10:1) to afford the title compound as a yellow oil (50.9 mg, 72%, 7.4:1 d.r.).

$^1\text{H NMR}$  (500 MHz,  $\text{CDCl}_3$ )  $\delta$  7.38 – 7.13 (m, 5H\*+5H'), 6.74 – 6.49 (m, 3H\*+3H'), 6.05 (ddd,  $J = 16.9, 10.4, 6.2$  Hz, 1H\*), 5.92 (d,  $J = 14.2$  Hz, 2H\*+3H'), 5.27 – 5.03 (m, 1H\*+1H'), 4.66 – 4.58 (m, 2H'), 4.57 – 4.09 (m, 2H\*), 4.08 – 4.01 (s, 1H\*), 3.89 (dd,  $J = 7.8, 3.8$  Hz, 1H'), 3.29 (dt,  $J = 8.6, 4.1$  Hz, 1H\*), 3.22 (dt,  $J = 8.6, 4.2$  Hz, 1H'), 2.72 (dt,  $J = 14.4, 7.2$  Hz, 1H\*+1H'), 2.62 (dd,  $J = 18.6, 4.3$  Hz, 1H'), 2.52 (dd,  $J = 18.5, 4.3$  Hz, 1H\*).

$^{13}\text{C}$  NMR (126 MHz,  $\text{CDCl}_3$ )  $\delta$  178.4, 178.0, 176.0, 148.1, 147.9, 146.9, 146.7, 138.0, 135.8, 135.6, 135.1, 134.1, 131.8, 128.9, 128.6<sub>4</sub>, 128.6<sub>0</sub>, 128.6, 128.0, 127.8, 122.1, 120.8, 119.3, 116.3, 109.1, 108.6, 108.5, 108.2, 101.2, 49.1, 48.0, 45.4, 44.0, 42.5, 42.4, 31.4, 31.2.

HRMS (ESI) calcd for  $\text{C}_{21}\text{H}_{20}\text{NO}_4$   $[\text{M}+\text{H}]^+$ : 350.13868, found: 350.13750.

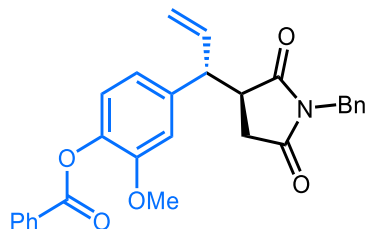

**4-(1-(1-Benzyl-2,5-dioxopyrrolidin-3-yl)allyl)-2-methoxyphenyl benzoate (3af):** (SGS-6-55)

Prepared following **General procedure A** using 1-benzyl-1*H*-pyrrole-2,5-dione (**2a**, 37.4 mg, 0.2 mmol, 1.0 equiv) and 2-methoxy-4-(6-oxo-4,6-diphenylhex-1-en-3-yl)phenyl benzoate (**1f**, 160.9 mg, 0.6 mmol, 3.0 equiv). The reaction mixture was heated at 40 °C for 24 h. The crude reaction mixture was purified by flash column chromatography (hexanes/ethyl acetate = 20:1) to afford the title compound as a yellow oil (75.2 mg, 83%, 8.5:1 d.r.).

$^1\text{H}$  NMR (500 MHz,  $\text{CDCl}_3$ )  $\delta$  8.22 – 8.18 (m, 2H\*+2H'), 7.65 – 7.60 (m, 1H\*+1H'), 7.54 – 7.47 (m, 2H\*+2H'), 7.36 – 7.20 (m, 3H\*+4H'), 7.15 – 7.10 (m, 2H\*+1H'), 7.07 (d,  $J$  = 8.1 Hz, 1H'), 6.98 (d,  $J$  = 8.1 Hz, 1H\*), 6.83 – 6.69 (m, 2H\*+2H'), 6.10 (ddd,  $J$  = 17.0, 10.5, 6.3 Hz, 1H\*), 5.91 (ddd,  $J$  = 17.1, 10.2, 8.6 Hz, 1H'), 5.30 – 5.07 (m, 2H\*+2H'), 4.65 – 4.48 (m, 2H\*+2H'), 4.11 (s, 1H\*), 4.05 (dd,  $J$  = 8.4, 3.6 Hz, 1H'), 3.75 (s, 3H'), 3.62 (s, 3H\*), 3.38 – 3.31 (m, 1H\*), 3.31 – 3.25 (m, 1H'), 2.82 – 2.65 (m, 1H\*+2H'), 2.57 (dd,  $J$  = 18.4, 4.7 Hz, 1H\*).

$^{13}\text{C}$  NMR (126 MHz,  $\text{CDCl}_3$ )  $\delta$  178.3, 178.1, 176.0, 175.8, 164.8, 164.6, 151.6, 151.4, 139.4, 139.3, 139.1, 137.6, 137.1, 135.7, 135.5, 134.2, 133.6, 130.4, 129.5, 128.9, 128.6<sub>9</sub>, 128.6<sub>5</sub>, 128.3, 128.0, 127.9, 123.2, 123.1, 120.7, 120.0, 119.6, 116.7, 113.3, 112.3, 56.0, 55.9, 48.9, 48.3, 45.5, 43.9, 42.6, 42.4, 31.5, 31.2. Three peaks missing due to overlap.

HRMS (ESI) calcd for  $\text{C}_{28}\text{H}_{26}\text{NO}_5$   $[\text{M}+\text{H}]^+$ : 456.18055, found: 456.17893.

### 2.1.1 Gram Scale Synthesis

**1 mmol scale synthesis of 3-(1-(4-methoxyphenyl)allyl)-1-phenylpyrrolidine-2,5-dione (3fc)** (SGS-6-47)

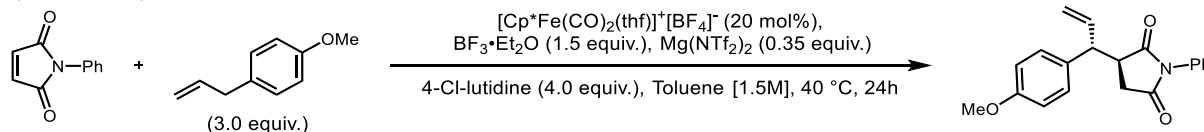

**1 mmol scale reaction:** A 25 mL round bottom flask equipped with a magnetic stir bar and septa was flame dried under vacuum and transferred into an argon-filled glovebox. In the glovebox were sequentially added  $[\text{Cp}^*\text{Fe}(\text{CO})_2(\text{thf})]^+[\text{BF}_4]^-$  (20 mol %, 82.2 mg),  $\text{Mg}(\text{NTf}_2)_2$  (204.6 mg, 0.35 equiv), 1-phenyl-1*H*-pyrrole-2,5-dione (**2f**, 173.2 mg, 1.0 mmol, 1.0 equiv), and dry toluene (0.65 mL, 1.5 M). The solution was briefly stirred. Then 4-allylanisole (**1c**, 0.46 mL, 3.0 equiv),  $\text{BF}_3 \cdot \text{Et}_2\text{O}$  (186  $\mu\text{L}$ , 1.5 equiv), and 4-Cl-lutidine (0.52 mL, 4.0 equiv) were sequentially added with brief stirring after each addition. The flask was

then sealed and removed from the glovebox and placed in an oil bath at 40 °C for 24 h at 400 rpm. After completion of the reaction, the reaction mixture was cooled to room temperature and filtered through a silica plug using ethyl acetate. The crude mixture was concentrated *in vacuo*. The crude mixture was purified by flash column chromatography (hexanes/ethyl acetate = 10:1) to afford the title compound as a brown oil (311.0 mg, 96%, 4.9:1 isolated d.r.). Succinimide **3fc** was crystallized from a diastereomerically enriched sample and relative stereochemistry was assigned through X-ray diffraction.

<sup>1</sup>H NMR (500 MHz, CDCl<sub>3</sub>) δ 7.47 – 7.26 (m, 3H\*+3H'), 7.21 – 7.07 (m, 2H\*+4H'), 6.96 (d, J = 7.6 Hz, 2H\*), 6.89 – 6.79 (m, 2H\*+2H'), 6.18 – 6.03 (m, 1H\*+1H'), 5.32 – 5.07 (m, 2H\*+2H'), 4.22 – 4.14 (m, 1H\*), 4.03 (dd, J = 8.4, 3.7 Hz, 1H'), 3.76 (s, 3H'), 3.74 (s, 3H\*), 3.44 – 3.39 (m, 1H\*), 3.38 – 3.34 (m, 1H'), 2.89 – 2.78 (m, 1H\*+1H'), 2.74 (dd, J = 18.5, 4.4 Hz, 1H'), 2.65 (dd, J = 18.5, 3.9 Hz, 1H\*).

<sup>13</sup>C NMR (126 MHz, CDCl<sub>3</sub>) δ 178.0, 177.5, 175.4, 175.2, 159.1, 158.7, 137.9, 135.2, 132.0, 131.9, 131.8, 129.9, 129.7, 129.1<sub>2</sub>, 129.0<sub>6</sub>, 128.7, 128.6<sub>1</sub>, 128.5<sub>8</sub>, 126.5, 119.3, 116.3, 114.3, 114.2, 55.3, 48.8, 47.7, 45.4, 44.0, 31.5, 31.2. One peak missing due to overlap.

HRMS (ESI) calcd for C<sub>20</sub>H<sub>20</sub>NO<sub>3</sub> [M+H]<sup>+</sup>: 322.14377, found: 322.14220.

m.p. = 93 – 97 °C

### 3 mmol scale synthesis of 1-(4-Bromophenyl)-3-(1-phenylallyl)pyrrolidine-2,5-dione (**3ka**) (SGS-6-82)

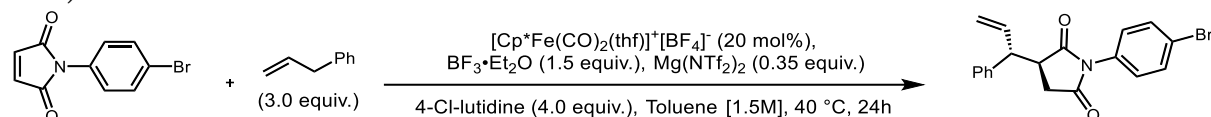

**3 mmol scale reaction:** A 25 mL round bottom flask equipped with a magnetic stir bar and septa was flame dried under vacuum and transferred into an argon-filled glovebox. In the glovebox were sequentially added [Cp\*Fe(CO)<sub>2</sub>(thf)]<sup>+</sup>[BF<sub>4</sub>]<sup>-</sup> (20 mol %, 246.6 mg), Mg(NTf<sub>2</sub>)<sub>2</sub> (613.8 mg, 0.35 equiv), 1-(4-bromophenyl)-1H-pyrrole-2,5-dione (**2k**, 752.9 mg, 3.0 mmol, 1.0 equiv), and dry toluene (2.0 mL, 1.5 M). The solution was briefly stirred. Then allylbenzene (**1a**, 1.19 mL, 3.0 equiv), BF<sub>3</sub>·Et<sub>2</sub>O (558 μL, 1.5 equiv), and 4-Cl-lutidine (1.56 mL, 4.0 equiv) were sequentially added with brief stirring after each addition. The flask was then sealed and removed from the glovebox and placed in an oil bath at 40 °C for 24 h at 400 rpm. After completion of the reaction, the reaction mixture was cooled to room temperature and filtered through a silica plug using ethyl acetate. The crude mixture was concentrated *in vacuo*. The crude mixture was purified by flash column chromatography (hexanes/ethyl acetate = 10:1) to afford the title compound as a brown oil (1.0224 g, 92%, 4.0:1 d.r.).

Characterization data match that of 0.2 mmol scale synthesis entry for **3ka**.

## 2.2 Synthesis of Michael adducts from Fe-catalyzed Michael addition – Oxazolidinones

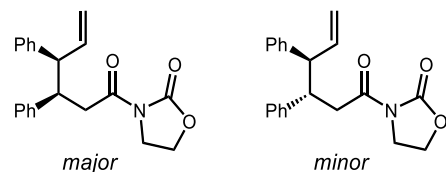

**3-(3,4-Diphenylhex-5-enoyl)oxazolidin-2-one (5aa):** (SGS-6-21) Prepared following **General procedure B** using 3-cinnamoyloxazolidin-2-one (**4a**, 43.4 mg, 0.2 mmol, 1.0 equiv) and allylbenzene

(**1a**, 79  $\mu$ L, 0.6 mmol, 3.0 equiv). The reaction mixture was heated at 80 °C for 24 h. The crude reaction mixture was purified by flash column chromatography (hexanes/ethyl acetate = 3:1) to afford the title compound as a brown oil (58.8 mg, 88%, 2.2:1 d.r.).

<sup>1</sup>H NMR (500 MHz, CDCl<sub>3</sub>)  $\delta$  7.36 – 6.97 (m, 10H\* + 10H'), 6.09 (dt,  $J$  = 17.0, 9.8 Hz, 1H'), 5.79 (ddd,  $J$  = 17.1, 10.2, 8.1 Hz, 1H\*), 5.13 (dd,  $J$  = 17.0, 1.1 Hz, 1H'), 5.03 (dd,  $J$  = 10.0, 1.6 Hz, 1H'), 4.75 (ddd,  $J$  = 10.3, 1.5, 0.7 Hz, 1H\*), 4.70 – 4.61 (m, 1H\*), 4.30 (td,  $J$  = 9.0, 6.7 Hz, 1H'), 4.26 – 4.09 (m, 2H\* + 1H'), 3.89 – 3.76 (m, 2H'), 3.73 – 3.62 (m, 3H\* + 1H'), 3.60 – 3.48 (m, 1H\* + 2H'), 3.46 – 3.34 (m, 1H\* + 1H'), 3.01 (dd,  $J$  = 16.8, 4.8 Hz, 1H\*). Throughout analysis of diastereomeric mixtures, H\* indicates the major diastereomer, while H' indicates the minor diastereomer.

<sup>13</sup>C NMR (126 MHz, CDCl<sub>3</sub>)  $\delta$  172.4, 172.1, 153.9, 153.4, 142.51, 142.46, 142.4, 142.1, 140.3, 139.8, 128.8, 128.6, 128.5, 128.4, 128.3, 128.0, 126.80, 126.75, 126.4, 126.2, 116.6, 116.2, 62.0, 61.9, 57.3, 56.1, 46.9, 46.5, 42.6, 42.5, 39.71, 39.68.

HRMS (ESI) calcd for C<sub>21</sub>H<sub>22</sub>O<sub>3</sub>N [M+H]<sup>+</sup>: 336.15942, found: 336.15835.

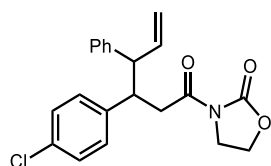

**3-(3-(4-Chlorophenyl)-4-phenylhex-5-enoyl)oxazolidin-2-one (5ba):** (SGS-6-71). Prepared following **General procedure B** using 3-(3-(4-chlorophenyl)acryloyl)oxazolidin-2-one (**4b**, 43.4 mg, 0.2 mmol, 1.0 equiv) and allylbenzene (**1a**, 79  $\mu$ L, 0.6 mmol, 3.0 equiv). The reaction mixture was heated at 80 °C for 24 h. The crude reaction mixture was purified by flash column chromatography (hexanes/ethyl acetate = 3:1) to afford the title compound as a yellow foam (55.2 mg, 75%, 2.3:1 d.r.).

<sup>1</sup>H NMR (500 MHz, CDCl<sub>3</sub>)  $\delta$  7.35 – 7.30 (m, 2H\*), 7.28 – 7.21 (m, 3H\* + 4H'), 7.19 – 7.11 (m, 2H\* + 2H'), 7.10 – 7.03 (m, 1H\* + 1H'), 7.02 – 6.97 (m, 1H\* + 2H'), 6.07 (dt,  $J$  = 17.0, 9.8 Hz, 1H'), 5.78 (ddd,  $J$  = 17.1, 10.2, 8.4 Hz, 1H\*), 5.21 (d,  $J$  = 16.9 Hz, 1H'), 5.12 (dd,  $J$  = 10.1, 1.3 Hz, 1H'), 4.86 (d,  $J$  = 10.3 Hz, 1H\*), 4.76 (d,  $J$  = 17.0 Hz, 1H\*), 5.25 – 5.10 (m, 2H'), 4.81 (dd,  $J$  = 47.8, 13.6 Hz, 2H\*), 4.35 – 4.18 (m, 2H\* + 2H'), 3.91 – 3.78 (m, 1H\*), 3.72 (td,  $J$  = 7.9, 2.0 Hz, 1H\* + 2H'), 3.69 – 3.62 (m, 1H\* + 1H'), 3.57 – 3.35 (m, 2H\* + 3H'), 2.99 (dd,  $J$  = 17.1, 4.7 Hz, 1H\*).

<sup>13</sup>C NMR (126 MHz, CDCl<sub>3</sub>)  $\delta$  172.0, 171.7, 153.5, 153.3, 142.0<sub>4</sub>, 142.0<sub>2</sub>, 140.8, 140.6, 139.9, 139.3, 132.3, 131.9, 130.0, 129.7, 128.7, 128.3<sub>9</sub>, 128.3<sub>5</sub>, 128.1, 127.9, 126.8, 126.3, 116.8, 116.5, 62.0, 61.8, 57.1, 55.9, 46.1, 45.7, 42.5, 42.4, 39.4<sub>9</sub>, 39.4<sub>5</sub>. One peak missing due to overlap.

HRMS (ESI) calcd for C<sub>21</sub>H<sub>21</sub>NO<sub>3</sub>Cl [M+H]<sup>+</sup>: 370.12045, found: 370.12052.

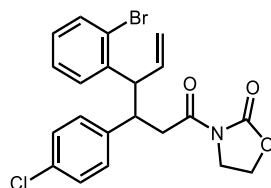

**3-(4-(2-Bromophenyl)-3-(4-chlorophenyl)hex-5-enoyl)oxazolidin-2-one (5bg):** (SGS-6-77) Prepared following **General procedure B** using 3-(3-(4-chlorophenyl)acryloyl)oxazolidin-2-one (**4b**, 43.4 mg, 0.2 mmol, 1.0 equiv) and 2-bromoallylbenzene (**1g**, 89  $\mu$ L, 0.6 mmol, 3.0 equiv). The reaction mixture was heated at 80 °C for 24 h. The crude reaction mixture was purified by flash column

chromatography (hexanes/ethyl acetate = 3:1) to afford the title compound as a yellow foam (76.5 mg, 85%, 2.3:1 d.r.).

<sup>1</sup>H NMR (500 MHz, CDCl<sub>3</sub>) δ 7.59 (dd, *J* = 8.0, 1.1 Hz, 1H<sup>\*</sup>), 7.36 (dd, *J* = 8.0, 1.0 Hz, 1H<sup>1</sup>), 7.30 – 7.21 (m, 3H<sup>\*</sup>+2H<sup>1</sup>), 7.20 – 7.13 (m, 2H<sup>\*</sup>+3H<sup>1</sup>), 7.12 – 7.06 (m, 2H<sup>\*</sup>+1H<sup>1</sup>), 6.90 (td, *J* = 8.0, 1.6 Hz, 1H<sup>1</sup>), 5.92 (dt, *J* = 17.0, 9.7 Hz, 1H<sup>1</sup>), 5.72 (ddd, *J* = 17.1, 10.2, 8.3 Hz, 1H<sup>\*</sup>), 5.23 (d, *J* = 16.6 Hz, 1H<sup>1</sup>), 5.07 (dd, *J* = 10.0, 1.2 Hz, 1H<sup>1</sup>), 4.84 (d, *J* = 10.2 Hz, 1H<sup>\*</sup>), 4.78 (d, *J* = 17.0 Hz, 1H<sup>\*</sup>), 4.36 – 4.18 (m, 3H<sup>\*</sup>+3H<sup>1</sup>), 3.92 – 3.79 (m, 2H<sup>1</sup>), 3.79 – 3.72 (m, 2H<sup>\*</sup>+1H<sup>1</sup>), 3.67 (td, *J* = 10.1, 4.0 Hz, 1H<sup>\*</sup>), 3.50 (dd, *J* = 16.7, 10.4 Hz, 1H<sup>\*</sup>), 3.43 (dd, *J* = 17.2, 9.5 Hz, 1H<sup>1</sup>), 3.35 (dd, *J* = 17.2, 4.5 Hz, 1H<sup>1</sup>), 2.85 (dd, *J* = 16.7, 4.0 Hz, 1H<sup>\*</sup>).

<sup>13</sup>C NMR (126 MHz, CDCl<sub>3</sub>) δ 171.9, 171.6, 153.6, 153.4, 141.1<sub>1</sub>, 141.0<sub>5</sub>, 140.3, 138.7, 137.8, 133.4, 133.1, 132.6, 132.2, 130.2, 129.9, 129.2, 128.9, 128.6, 128.3, 128.2, 127.8<sub>3</sub>, 127.8<sub>1</sub>, 127.5, 125.5, 124.8, 117.9, 117.6, 62.1, 62.0, 53.9, 53.3, 45.7, 44.7, 42.6, 42.5, 39.8, 39.2. One peak missing due to overlap.

HRMS (ESI) calcd for C<sub>21</sub>H<sub>20</sub>NO<sub>3</sub>ClBr [M+H]<sup>+</sup>: 448.03096, found: 448.03139.

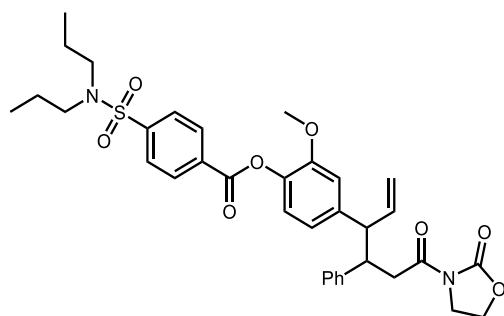

**2-Methoxy-4-(6-oxo-6-(2-oxooxazolidin-3-yl)-4-phenylhex-1-en-3-yl)phenyl 4-(*N,N*-dipropylsulfamoyl)benzoate (5ah):** (SGS-6-76) Prepared following **General procedure B** using 3-cinnamoyloxazolidin-2-one (**4a**, 43.4 mg, 0.2 mmol, 1.0 equiv) and 4-allyl-2-methoxyphenyl 4-(*N,N*-dipropylsulfamoyl)benzoate (**1h**, 258.9 mg, 0.6 mmol, 3.0 equiv). The reaction mixture was heated at 80 °C for 24 h. The crude reaction mixture was purified by flash column chromatography (hexanes/ethyl acetate = 3:1) to afford the title compound as a yellow foam with diastereomers eluting separately as yellow foams with a 1.5:1 d.r. and 89% total yield. (major diastereomers 69.5 mg 53%) (minor diastereomers 46.4 mg, 36%).

Major Isomer

<sup>1</sup>H NMR (500 MHz, CDCl<sub>3</sub>) δ 8.30 (d, *J* = 8.3 Hz, 2H), 7.93 (d, *J* = 8.3 Hz, 2H), 7.30 (t, *J* = 7.4 Hz, 1H), 7.25 (d, *J* = 6.8 Hz, 1H), 7.21 (t, *J* = 7.1 Hz, 1H), 7.09 (d, *J* = 8.0 Hz, 1H), 6.94 – 6.86 (m, 2H), 5.85 – 5.71 (m, 1H), 4.85 (d, *J* = 10.2 Hz, 1H), 4.76 (d, *J* = 17.0 Hz, 1H), 4.29 (q, *J* = 8.5 Hz, 1H), 4.19 (q, *J* = 8.6 Hz, 1H), 3.82 (s, 3H), 3.78 – 3.66 (m, 3H), 3.63 – 3.56 (m, 1H), 3.33 (dd, *J* = 16.6, 6.0 Hz, 1H), 3.24 (dd, *J* = 16.6, 7.8 Hz, 1H), 3.15 – 3.09 (m, 4H), 1.61 – 1.53 (m, 4H), 0.89 (t, *J* = 7.4 Hz, 6H).

<sup>13</sup>C NMR (126 MHz, CDCl<sub>3</sub>) δ 171.9, 163.6, 153.5, 151.0, 144.8, 142.4, 141.6, 139.5, 138.4, 132.8, 131.0, 128.6, 128.4, 127.2, 126.8, 122.6, 120.9, 116.4, 112.9, 62.0, 56.1, 56.0, 50.1, 46.8, 42.5, 39.7, 22.1, 11.3.

HRMS (ESI) calcd for C<sub>35</sub>H<sub>41</sub>N<sub>2</sub>O<sub>8</sub>S [M+H]<sup>+</sup>: 649.25781, found: 649.25814

Minor Isomer

<sup>1</sup>H NMR (500 MHz, CDCl<sub>3</sub>) δ 8.26 (d, *J* = 8.4 Hz, 2H), 7.90 (d, *J* = 8.5 Hz, 2H), 7.15 (t, *J* = 7.4 Hz, 2H), 7.12 – 7.02 (m, 3H), 6.92 (d, *J* = 8.1 Hz, 1H), 6.69 (dd, *J* = 8.2, 1.8 Hz, 1H), 6.55 (d, *J* = 1.7 Hz, 1H), 6.11 (dt, *J* = 17.0, 9.8 Hz, 1H), 5.23 (d, *J* = 16.9 Hz, 1H), 5.16 (dd, *J* = 10.1, 1.3 Hz, 1H), 4.32 (td, *J* = 9.0, 6.7

Hz, 1H), 4.24 (td,  $J = 9.0, 7.3$  Hz, 1H), 3.90 – 3.77 (m, 2H), 3.68 – 3.60 (m, 4H), 3.59 – 3.40 (m, 3H), 3.15 – 3.05 (m, 4H), 1.56 (dq,  $J = 14.9, 7.4$  Hz, 4H), 0.88 (t,  $J = 7.4$  Hz, 6H).

$^{13}\text{C}$  NMR (126 MHz,  $\text{CDCl}_3$ )  $\delta$  172.3, 163.5, 153.6, 150.6, 144.8, 141.9, 141.8, 139.6, 137.9, 132.9, 130.95, 128.5, 128.2, 127.2, 126.6, 122.3, 120.2, 117.1, 112.7, 62.1, 57.1, 56.0, 50.1, 46.7, 42.6, 39.4, 22.1, 11.3.

HRMS (ESI) calcd for  $\text{C}_{35}\text{H}_{41}\text{N}_2\text{O}_8\text{S}$   $[\text{M}+\text{H}]^+$ : 649.25781, found: 649.25785.

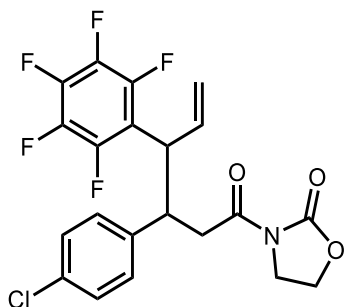

**3-(3-(4-Chlorophenyl)-4-(perfluorophenyl)hex-5-enoyl)oxazolidin-2-one (5bj):** (SGS-7-8)

Prepared following **General procedure B** using 3-(3-(4-chlorophenyl)acryloyl)oxazolidin-2-one (**4b**, 43.4 mg, 0.2 mmol, 1.0 equiv) and allylpentafluorobenzene (**1j**, 91  $\mu\text{L}$ , 0.6 mmol, 3.0 equiv). The reaction mixture was heated at 80  $^\circ\text{C}$  for 24 h. The crude reaction mixture was purified by flash column chromatography (hexanes/ethyl acetate = 3:1) to afford the title compound as a brown foam (58.2 mg, 63%, 1.4:1 d.r.).

$^1\text{H}$  NMR (500 MHz,  $\text{CDCl}_3$ )  $\delta$  7.31 – 7.27 (m, 2H $^*$ ), 7.21 – 7.09 (m, 2H $^*$ +4H $'$ ), 6.10 (dt,  $J = 17.1, 9.7$  Hz, 1H $'$ ), 5.90 – 5.78 (m, 1H $^*$ ), 5.30 (d,  $J = 16.8$  Hz, 1H $'$ ), 5.19 (d,  $J = 9.9$  Hz, 1H $'$ ), 4.85 (d,  $J = 10.1$  Hz, 2H $^*$ ), 4.77 (d,  $J = 16.9$  Hz, 2H $^*$ ), 4.38 – 4.21 (m, 2H $^*$ +2H $'$ ), 4.03 – 3.94 (m, 1H $^*$ +1H $'$ ), 3.93 – 3.72 (m, 3H $^*$ +3H $'$ ), 3.54 – 3.48 (m, 1H $^*$ +1H $'$ ), 3.39 (dd,  $J = 17.3, 3.9$  Hz, 1H $'$ ), 2.83 (dd,  $J = 16.7, 3.8$  Hz, 1H $^*$ ).

$^{13}\text{C}$  NMR (126 MHz,  $\text{CDCl}_3$ )  $\delta$  171.3, 170.8, 153.6, 153.4, 139.9, 139.6, 135.8, 135.1, 133.1, 133.0, 130.0, 129.7, 129.1, 129.0, 128.9, 128.8, 120.2, 118.9, 62.2, 62.1, 46.7, 45.9, 43.8, 42.9, 42.6, 42.5, 40.3, 39.6. Peaks missing from complex C-F coupling and overlap.

$^{19}\text{F}$  NMR (376 MHz,  $\text{CDCl}_3$ )  $\delta$  -140.68, -141.75, -155.56 (t,  $J = 21.0$  Hz), -156.01 (t,  $J = 21.1$  Hz), -161.24 (td,  $J = 22.1, 8.0$  Hz), -161.92 (td,  $J = 22.1, 7.7$  Hz).

HRMS (ESI) calcd for  $\text{C}_{21}\text{H}_{16}\text{NO}_3\text{ClF}_5$   $[\text{M}+\text{H}]^+$ : 460.07334, found: 460.07292.

### 2.3 Synthesis of Michael adducts from Fe-catalyzed Michael addition – Phthalimides

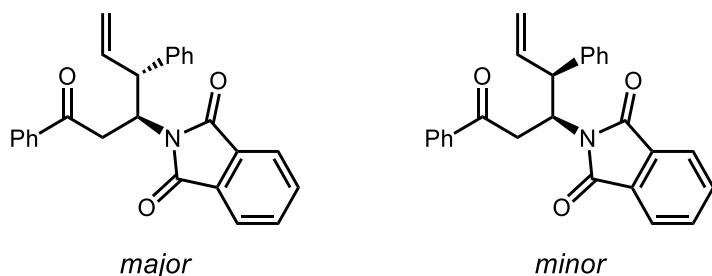

**2-(1-Oxo-1,4-diphenylhex-5-en-3-yl)isoindoline-1,3-dione (7aa):** (SGS-5-144) Prepared following **General procedure C** using 2-(3-oxo-3-phenylprop-1-en-1-yl)isoindoline-1,3-dione (**6a**, 55.5 mg, 0.2

mmol, 1.0 equiv) and allylbenzene (**1a**, 79  $\mu$ L, 0.6 mmol, 3.0 equiv). The reaction mixture was heated at 80 °C for 16 h. The crude reaction mixture was purified by flash column chromatography (hexanes/ethyl acetate = 20:1) to afford the title compound as a tan foam (73.2 mg, 93%, 1.2:1 d.r.).

<sup>1</sup>H NMR (500 MHz, CDCl<sub>3</sub>)  $\delta$  7.94 – 7.90 (m, 2H'), 7.86 – 7.10 (m, 14H\* + 11H'), 7.06 – 7.00 (m, 1H'), 6.07 (dt,  $J$  = 16.9, 9.8 Hz, 1H'), 5.95 (dt,  $J$  = 16.9, 9.9 Hz, 1H\*), 5.35 (d,  $J$  = 16.8 Hz, 1H'), 5.26 – 5.15 (m, 1H\* + 2H'), 5.02 (dd,  $J$  = 16.8, 0.9 Hz, 1H\*), 4.86 (dd,  $J$  = 10.0, 1.4 Hz, 1H\*), 4.27 – 4.04 (m, 2H\* + 2H'), 3.59 (dd,  $J$  = 17.8, 3.3 Hz, 1H'), 2.93 (dd,  $J$  = 17.7, 2.8 Hz, 1H\*). Throughout analysis of diastereomeric mixtures, H\* indicates the major diastereomer, while H' indicates the minor diastereomer.

<sup>13</sup>C NMR (101 MHz, CDCl<sub>3</sub>)  $\delta$  197.6, 197.5, 168.6, 168.2, 140.9, 140.4, 139.0, 138.6, 136.7, 136.5, 134.0, 133.7, 133.4, 133.3, 131.8, 131.5, 129.4, 128.7, 128.6, 128.2, 128.1<sub>2</sub>, 128.0<sub>5</sub>, 127.8, 127.5, 127.1, 123.3, 123.1, 118.1, 117.2, 53.5<sub>0</sub>, 53.4<sub>5</sub>, 51.2, 50.2, 39.0, 38.1 (one carbon missing due to overlap). Note: <sup>13</sup>C signals for the phthalimide carbonyl peaks are extremely broad for this and similar examples and many scans are required to adequate S/N for these peaks.

HRMS (ESI) calcd for C<sub>26</sub>H<sub>22</sub>O<sub>3</sub>N [M+H]<sup>+</sup>: 396.16116, found: 396.15942.

**1 mmol scale reaction:** A 25 mL round bottom flask equipped with a magnetic stir bar and septa was flame dried under vacuum and transferred into an argon-filled glovebox. In the glovebox were sequentially added [Cp\*Fe(CO)<sub>2</sub>(thf)]<sup>+</sup>[BF<sub>4</sub>]<sup>-</sup> (20 mol %, 82.2 mg), LiNTf<sub>2</sub> (170.0 mg, 0.6 equiv), 2-(3-oxo-3-phenylprop-1-en-1-yl)isoindoline-1,3-dione (**6a**, 277.5 mg, 1.0 mmol, 1.0 equiv), and dry DCE (0.65 mL, 1.5 M). The solution was briefly stirred. Then allylbenzene (**1a**, 395  $\mu$ L, 3.0 equiv), TIPSOTf (670  $\mu$ L, 1.5 equiv), and collidine (375  $\mu$ L, 3.0 equiv) were sequentially added with brief stirring after each addition. The flask was then sealed and removed from the glovebox and placed in an oil bath at 80 °C for 16 h at 400 rpm. After completion of the reaction, the reaction mixture was cooled to room temperature and filtered through a silica plug using ethyl acetate. The crude mixture was concentrated *in vacuo*. The crude mixture was purified by flash column chromatography (hexanes/ethyl acetate = 20:1) to afford the title compound as a brown oil (350.4 mg, 89% yield, 1.2:1 d.r.).

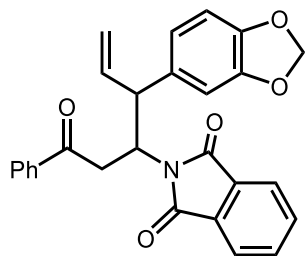

**2-(4-(Benzo[d][1,3]dioxol-5-yl)-1-oxo-1-phenylhex-5-en-3-yl)isoindoline-1,3-dione (7ae):** (SGS-6-1) Prepared following **General procedure C** using 2-(3-oxo-3-phenylprop-1-en-1-yl)isoindoline-1,3-dione (**6a**, 55.5 mg, 0.2 mmol, 1.0 equiv) and safrole (**1e**, 89  $\mu$ L, 0.6 mmol, 3.0 equiv). The reaction mixture was heated at 80 °C for 16 h. The crude reaction mixture was purified by flash column chromatography (hexanes/ethyl acetate = 10:1) to afford the title compound as a white foam (62.3 mg, 71%, 1.2:1 d.r.).

<sup>1</sup>H NMR (500 MHz, CDCl<sub>3</sub>)  $\delta$  7.93 – 7.89 (m, 2H'), 7.85 – 7.74 (m, 4H\*), 7.70 – 7.63 (m, 2H\*+2H'), 7.60 – 7.55 (m, 2H'), 7.55 – 7.50 (m, 1H), 7.50 – 7.45 (m, 1H), 7.44 – 7.39 (m, 2H), 7.39 – 7.34 (m, 2H), 6.89 (d,  $J$  = 1.6 Hz, 1H\*), 6.86 (dd,  $J$  = 8.0, 1.7 Hz, 1H\*), 6.80 (d,  $J$  = 7.9 Hz, 1H\*), 6.74 (d,  $J$  = 1.7 Hz, 1H'), 6.65 (dd,  $J$  = 8.0, 1.7 Hz, 1H'), 6.57 (d,  $J$  = 8.0 Hz, 1H'), 6.00 (dt,  $J$  = 16.9, 9.8 Hz, 1H\*), 5.96 – 5.85

(m, 2H\*+ 1H'), 5.80 (dd,  $J = 12.4, 1.5$  Hz, 2H'), 5.33 (d,  $J = 16.7$  Hz, 1H'), 5.20 – 5.09 (m, 1H\*+ 2H'), 5.00 (dd,  $J = 16.8, 0.8$  Hz, 1H\*), 4.85 (dd,  $J = 10.0, 1.4$  Hz, 1H\*), 4.17 – 4.01 (m, 2H\*+2H'), 3.56 (dd,  $J = 17.8, 3.3$  Hz, 1H'), 3.00 (dd,  $J = 17.8, 2.9$  Hz, 1H\*).

$^{13}\text{C NMR}$  (126 MHz,  $\text{CDCl}_3$ )  $\delta$  197.6, 197.5, 148.4, 147.7, 146.9, 146.5, 139.1, 138.6, 136.8, 136.6, 134.7, 134.3, 134.0, 133.8, 133.4, 133.3, 131.8, 131.6, 128.7<sub>4</sub>, 128.6<sub>5</sub>, 128.2<sub>1</sub>, 128.1<sub>5</sub>, 123.2, 121.3, 120.9, 117.9, 117.1, 109.0, 108.4, 108.2, 108.1, 101.3, 101.0, 53.0<sub>7</sub>, 53.0<sub>5</sub>, 51.3, 50.4, 39.0, 38.1. One peak missing due to overlap. Phthalimide carbonyls not observed.

**HRMS** (ESI) calcd for  $\text{C}_{27}\text{H}_{22}\text{NO}_5$   $[\text{M}+\text{H}]^+$ : 440.14925, found: 440.14857.

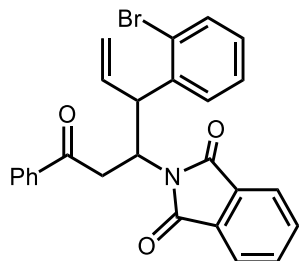

**2-(4-(2-Bromophenyl)-1-oxo-1-phenylhex-5-en-3-yl)isoindoline-1,3-dione (7ag):** (SGS-6-2)

Prepared following **General procedure C** using 2-(3-oxo-3-phenylprop-1-en-1-yl)isoindoline-1,3-dione (**6a**, 55.5 mg, 0.2 mmol, 1.0 equiv) and 2-bromoallylbenzene (**1g**, 89  $\mu\text{L}$ , 0.6 mmol, 3.0 equiv). The reaction mixture was heated at 80 °C for 16 h. The crude reaction mixture was purified by flash column chromatography (hexanes/ethyl acetate = 10:1) to afford the title compound as a white foam (75.5 mg, 81%, 1.6:1 d.r.).

$^1\text{H NMR}$  (500 MHz,  $\text{CDCl}_3$ )  $\delta$  7.93 (d,  $J = 7.5$  Hz, 2H'), 7.88 – 7.71 (m, 3H\*+1H'), 7.71 – 7.51 (m, 4H\*+4H'), 7.51 – 7.32 (m, 5H\*+4H'), 7.23 (t,  $J = 7.5$  Hz, 1H'), 7.10 (t,  $J = 7.3$  Hz, 1H\*), 6.93 (t,  $J = 7.3$  Hz, 1H'), 5.96 – 5.82 (m, 2H\*+2H'), 5.46 (d,  $J = 16.9$  Hz, 1H'), 5.37 (td,  $J = 11.3, 3.5$  Hz, 1H'), 5.31 – 5.20 (m, 1H\*), 5.18 (d,  $J = 10.0$  Hz, 1H'), 5.13 (d,  $J = 16.8$  Hz, 1H\*), 4.96 – 4.83 (m, 2H\*+1H'), 4.30 (dd,  $J = 17.9, 10.9$  Hz, 1H\*), 4.13 (dd,  $J = 17.9, 9.7$  Hz, 1H'), 3.65 (dd,  $J = 17.9, 3.6$  Hz, 1H'), 2.90 (dd,  $J = 17.9, 2.7$  Hz, 1H\*).

$^{13}\text{C NMR}$  (126 MHz,  $\text{CDCl}_3$ )  $\delta$  197.5, 197.3, 168.8, 168.0, 140.0, 139.2, 138.0, 137.2, 136.7, 136.5, 134.0, 133.8, 133.6, 133.4, 133.4, 133.2, 131.6, 129.0, 128.7, 128.6, 128.4, 128.3, 128.2, 128.1, 127.8, 125.3, 124.8, 123.7, 123.2, 123.1, 118.8, 118.5, 51.8, 51.3, 50.7, 49.3, 39.2, 37.5. Missing two due to overlap.

**HRMS** (ESI) calcd for  $\text{C}_{26}\text{H}_{21}\text{NO}_3\text{Br}$   $[\text{M}+\text{H}]^+$ : 474.06993, found: 474.07021.

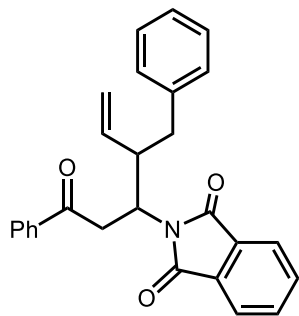

**2-(4-Benzyl-1-oxo-1-phenylhex-5-en-3-yl)isoindoline-1,3-dione (7ak):** (SGS-6-3) Prepared following **General procedure D** using 2-(3-oxo-3-phenylprop-1-en-1-yl)isoindoline-1,3-dione (**6a**, 55.5



mg, 0.2 mmol, 1.0 equiv) and 4-phenyl-1-butene (**1k**, 90  $\mu$ L, 0.6 mmol, 3.0 equiv). The reaction mixture was heated at 80 °C for 16 h. The crude reaction mixture was purified by flash column chromatography (hexanes/ethyl acetate = 10:1) to afford the title compound as a white foam (53.8 mg, 66%, 1.0:1 d.r.).

**<sup>1</sup>H NMR** (500 MHz, CDCl<sub>3</sub>)  $\delta$  7.94 – 7.85 (m, 2H\*+2H'), 7.79 – 7.72 (m, 2H\*+2H'), 7.68 – 7.63 (m, 2H\*+2H'), 7.56 – 7.49 (m, 1H\*+1H'), 7.44 – 7.39 (m, 2H\*+2H'), 7.29 – 7.23 (m, 1H\*+1H'), 7.17 (t,  $J$  = 7.4 Hz, 1H\*+2H'), 7.10 (t,  $J$  = 7.5 Hz, 1H\*+1H'), 7.03 (d,  $J$  = 7.2 Hz, 1H\*+1H'), 6.98 (t,  $J$  = 7.3 Hz, 1H\*), 5.68 – 5.51 (m, 1H\*+1H'), 5.10 – 5.00 (m, 1H\*+1H'), 4.97 (td,  $J$  = 9.7, 3.8 Hz, 1H'), 4.88 (td,  $J$  = 10.5, 3.4 Hz, 1H\*), 4.75 (ddd,  $J$  = 18.3, 13.6, 1.5 Hz, 1H\*+1H'), 4.19 (dd,  $J$  = 17.8, 9.8 Hz, 1H\*), 4.03 (dd,  $J$  = 17.9, 10.3 Hz, 1H'), 3.53 – 3.49 (m, 1H\*), 3.49 – 3.44 (m, 1H'), 3.30 (qd,  $J$  = 9.6, 5.3 Hz, 1H'), 3.16 (qd,  $J$  = 9.9, 4.1 Hz, 1H\*), 3.01 (dd,  $J$  = 13.7, 4.1 Hz, 1H'), 2.76 (dd,  $J$  = 13.9, 5.2 Hz, 1H\*), 2.65 – 2.53 (m, 1H\*+1H').

**<sup>13</sup>C NMR** (126 MHz, CDCl<sub>3</sub>)  $\delta$  197.7, 197.4, 168.5<sub>8</sub>, 168.5<sub>7</sub>, 139.4, 139.3, 138.7, 137.9, 136.6, 136.7, 133.9, 133.4, 133.3, 131.8, 131.8, 129.3, 129.1, 128.7, 128.7, 128.3, 128.2, 128.1<sub>4</sub>, 128.1<sub>0</sub>, 126.6, 125.8, 123.3, 119.0, 118.3, 50.6, 50.4, 49.4, 48.3, 39.1, 38.8, 38.7, 38.6.

**HRMS** (ESI) calcd for C<sub>27</sub>H<sub>24</sub>NO<sub>3</sub> [M+H]<sup>+</sup>: 410.17507, found: 410.17352.

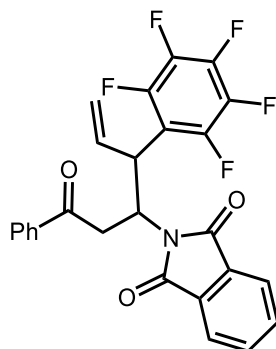

**2-(1-Oxo-4-(perfluorophenyl)-1-phenylhex-5-en-3-yl)isoindoline-1,3-dione (7aj):** (SGS-6-4)

Prepared following **General procedure C** using 2-(3-oxo-3-phenylprop-1-en-1-yl)isoindoline-1,3-dione (**6a**, 55.5 mg, 0.2 mmol, 1.0 equiv) and allylpentafluorobenzene (**1j**, 91  $\mu$ L, 0.6 mmol, 3.0 equiv). The reaction mixture was heated at 80 °C for 16 h. The crude reaction mixture was purified by flash column chromatography (hexanes/ethyl acetate = 10:1) to afford the title compound as a white foam (72.1 mg, 74%, 1.2:1 d.r.).

**<sup>1</sup>H NMR** (500 MHz, CDCl<sub>3</sub>)  $\delta$  7.92 – 7.89 (m, 2H'), 7.87 – 7.75 (m, 3H\*+1H'), 7.75 – 7.68 (m, 3H\*+1H'), 7.67 – 7.62 (m, 2H'), 7.57 – 7.49 (m, 1H\*+1H'), 7.45 – 7.36 (m, 2H\*+2H'), 6.25 – 6.15 (m, 1H'), 6.15 – 6.04 (m, 1H\*), 5.51 – 5.40 (m, 1H\*+2H'), 5.32 (d,  $J$  = 9.9 Hz, 1H'), 5.16 (d,  $J$  = 16.8 Hz, 1H\*), 5.02 (d,  $J$  = 10.0 Hz, 1H\*), 4.64 (t,  $J$  = 10.5 Hz, 1H\*+1H'), 4.14 (dd,  $J$  = 17.6, 9.8 Hz, 1H\*+1H'), 3.57 (dd,  $J$  = 18.0, 3.8 Hz, 1H'), 3.04 (dd,  $J$  = 17.6, 4.0 Hz, 1H\*).

**<sup>13</sup>C NMR** (101 MHz, CDCl<sub>3</sub>)  $\delta$  196.8, 196.3, 168.8, 167.9, 146.7 – 146.2 (m), 144.2 – 143.8 (m), 142.1 – 141.3 (m), 139.7 – 138.4 (m), 136.9 – 136.6 (m), 136.5, 136.3, 136.2 – 135.8 (m), 134.2<sub>3</sub>, 134.2<sub>1</sub>, 133.9, 133.6, 133.6, 131.6, 131.3, 128.7<sub>9</sub>, 128.7<sub>7</sub>, 128.2, 128.1, 123.7, 121.4, 120.5, 114.9 – 113.2 (m), 48.6, 48.5, 43.8, 43.2, 38.8, 38.4. Carbon spectra was run an extended time to attempt to resolve low intensity peaks, however, some carbons are still missing due to complex C-F coupling and overlap.

**<sup>19</sup>F NMR** (471 MHz, CDCl<sub>3</sub>)  $\delta$  -140.61, -154.70 (t,  $J$  = 20.9 Hz), -155.09 (t,  $J$  = 21.0 Hz), -160.77 (td,  $J$  = 21.9, 7.9 Hz), -161.33 (td,  $J$  = 22.0, 7.8 Hz). One peak missing due to overlap.

**HRMS** (ESI) calcd for  $C_{26}H_{17}NO_3F_5$   $[M+H]^+$ : 486.11231, found: 486.11205.

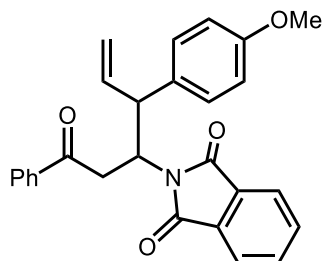

**2-(4-(4-Methoxyphenyl)-1-oxo-1-phenylhex-5-en-3-yl)isoindoline-1,3-dione (7ac):** (SGS-6-5)

Prepared following **General procedure C** using 2-(3-oxo-3-phenylprop-1-en-1-yl)isoindoline-1,3-dione (**6a**, 55.5 mg, 0.2 mmol, 1.0 equiv) and allylanisole (**1c**, 92  $\mu$ L, 0.6 mmol, 3.0 equiv). The reaction mixture was heated at 80 °C for 16 h. The crude reaction mixture was purified by flash column chromatography (hexanes/ethyl acetate = 10:1) to afford the title compound as a clear oil (75.2 mg, 88%, 1.5:1 d.r.).

**<sup>1</sup>H NMR** (500 MHz,  $CDCl_3$ )  $\delta$  7.94 – 7.90 (m, 2H<sup>'</sup>), 7.80 (s (br), 1H<sup>\*</sup>+1H<sup>'</sup>), 7.77 – 7.73 (m, 2H<sup>\*</sup>), 7.70 – 7.60 (m, 2H<sup>\*</sup>+2H<sup>'</sup>), 7.58 – 7.49 (m, 2H<sup>\*</sup>+1H<sup>'</sup>), 7.47 (t,  $J$  = 7.4 Hz, 1H<sup>\*</sup>), 7.42 (t,  $J$  = 7.7 Hz, 2H<sup>'</sup>), 7.38 – 7.29 (m, 2H<sup>\*</sup>+2H<sup>'</sup>), 7.16 – 7.11 (m, 2H<sup>'</sup>), 6.94 – 6.88 (m, 2H<sup>\*</sup>), 6.71 – 6.66 (m, 2H<sup>'</sup>), 6.04 (dt,  $J$  = 17.0, 9.8 Hz, 1H<sup>'</sup>), 5.93 (dt,  $J$  = 16.9, 9.8 Hz, 1H<sup>\*</sup>), 5.32 (d,  $J$  = 16.9 Hz, 1H<sup>'</sup>), 5.22 – 5.14 (m, 1H<sup>\*</sup>+2H<sup>'</sup>), 5.00 (dd,  $J$  = 16.8, 0.9 Hz, 1H<sup>\*</sup>), 4.84 (dd,  $J$  = 10.0, 1.4 Hz, 1H<sup>\*</sup>), 4.21 – 4.05 (m, 2H<sup>\*</sup>+2H<sup>'</sup>), 3.79 (s, 3H<sup>\*</sup>), 3.65 (s, 3H<sup>'</sup>), 3.59 (dd,  $J$  = 17.7, 3.2 Hz, 1H<sup>'</sup>), 2.98 (dd,  $J$  = 17.7, 2.8 Hz, 1H<sup>\*</sup>).

**<sup>13</sup>C NMR** (126 MHz,  $CDCl_3$ )  $\delta$  197.7, 197.5, 158.9, 158.5, 139.4, 138.9, 136.8, 136.6, 133.9, 133.7, 133.4, 133.3, 132.9, 132.5, 131.9, 131.5, 129.0, 128.7, 128.6, 128.2, 128.1, 123.1, 117.6, 116.8, 114.8, 114.1, 55.4, 55.2, 52.6, 52.6, 51.4, 50.4, 39.1, 38.1. One peak missing due to overlap. Phthalimide carbonyls not observed.

**HRMS** (ESI) calcd for  $C_{27}H_{24}NO_4$   $[M+H]^+$ : 426.16961, found: 426.16998.

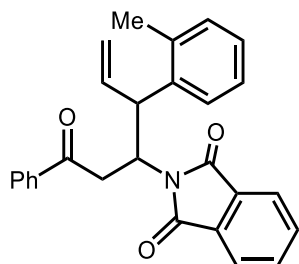

**2-(1-Oxo-1-phenyl-4-(o-tolyl)hex-5-en-3-yl)isoindoline-1,3-dione (7ai):** (SGS-6-6) Prepared following **General procedure C** using 2-(3-oxo-3-phenylprop-1-en-1-yl)isoindoline-1,3-dione (**6a**, 55.5 mg, 0.2 mmol, 1.0 equiv) and 2-methylallylbenzene (**1i**, 88  $\mu$ L, 0.6 mmol, 3.0 equiv). The reaction mixture was heated at 80 °C for 16 h. The crude reaction mixture was purified by flash column chromatography (hexanes/ethyl acetate = 10:1) to afford the title compound as a clear oil (68.2 mg, 83%, 1.8:1 d.r.).

**<sup>1</sup>H NMR** (500 MHz,  $CDCl_3$ )  $\delta$  7.93 (d,  $J$  = 7.5 Hz, 2H<sup>'</sup>), 7.90 – 7.71 (m, 3H<sup>\*</sup>+2H<sup>'</sup>), 7.70 – 7.65 (m, 2H<sup>\*</sup>), 7.65 – 7.61 (m, 2H<sup>'</sup>), 7.57 – 7.50 (m, 1H<sup>\*</sup>+1H<sup>'</sup>), 7.50 – 7.39 (m, 2H<sup>\*</sup>+2H<sup>'</sup>), 7.38 – 7.31 (m, 2H<sup>\*</sup>+1H<sup>'</sup>), 7.26 – 7.18 (m, 2H<sup>\*</sup>), 7.15 (t,  $J$  = 7.3 Hz, 1H<sup>\*</sup>), 7.09 (t,  $J$  = 7.2 Hz, 1H<sup>'</sup>), 6.99 – 6.91 (m, 2H<sup>'</sup>), 5.95 – 5.83 (m, 1H<sup>\*</sup>+1H<sup>'</sup>), 5.38 – 5.24 (m, 1H<sup>\*</sup>+2H<sup>'</sup>), 5.13 (d,  $J$  = 10.0 Hz, 1H<sup>'</sup>), 5.00 (d,  $J$  = 16.9 Hz, 1H<sup>\*</sup>), 4.85 (d,

$J = 10.0$  Hz,  $1H^*$ ),  $4.58$  (t,  $J = 10.4$  Hz,  $1H'$ ),  $4.53 - 4.45$  (t,  $J = 10.4$  Hz,  $1H^*$ ),  $4.17 - 4.02$  (m,  $1H^*+1H'$ ),  $3.65$  (dd,  $J = 17.6, 3.2$  Hz,  $1H'$ ),  $2.92$  (dd,  $J = 17.5, 2.5$  Hz,  $1H^*$ ),  $2.51$  (s,  $3H^*$ ),  $2.33$  (s,  $3H'$ ).

$^{13}C$  NMR (126 MHz,  $CDCl_3$ )  $\delta$  197.6, 197.4, 169.0, 168.0, 139.3, 138.7, 138.4, 138.0, 136.7, 136.4, 136.4, 136.2, 133.9, 133.7, 133.3, 133.2, 131.0, 130.6, 128.6, 128.5, 128.1, 128.0, 127.0, 126.9, 126.8, 126.5, 126.4, 126.2, 123.6, 123.0, 117.4, 117.0, 51.3, 49.3, 48.8, 47.6, 39.2, 37.4, 20.1, 19.4.

HRMS (ESI) calcd for  $C_{27}H_{24}NO_3$   $[M+H]^+$ : 410.17507, found: 410.17531.

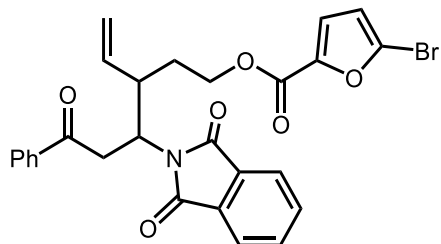

**4-(1,3-Dioxoisindolin-2-yl)-6-oxo-6-phenyl-3-vinylhexyl 5-bromofuran-2-carboxylate (7an):**

(SGS-6-7) Prepared following **General procedure D** using 2-(3-oxo-3-phenylprop-1-en-1-yl)isoindoline-1,3-dione (**6a**, 55.5 mg, 0.2 mmol, 1.0 equiv) and pent-4-en-1-yl 5-bromofuran-2-carboxylate (**1n**, 155.0 mg, 0.6 mmol, 3.0 equiv). The reaction mixture was heated at  $80$  °C for 16 h. The crude reaction mixture was purified by flash column chromatography (hexanes/ethyl acetate = 10:1) to afford the title compound as a clear oil (44.0 mg, 41%, 1.1:1 d.r.).

$^1H$  NMR (500 MHz,  $CDCl_3$ )  $\delta$  7.94 – 7.90 (m,  $2H'$ ), 7.89 – 7.85 (m,  $2H^*$ ), 7.83 – 7.79 (m,  $2H^*$ ), 7.79 – 7.75 (m,  $2H'$ ), 7.72 – 7.68 (m,  $2H^*$ ), 7.68 – 7.63 (m,  $2H'$ ), 7.52 (dd,  $J = 15.7, 7.5$  Hz,  $1H^*+1H'$ ), 7.41 (dd,  $J = 16.4, 8.2$  Hz,  $2H^*+2H'$ ), 7.13 (d,  $J = 3.5$  Hz,  $1H'$ ), 7.08 (d,  $J = 3.5$  Hz,  $1H^*$ ), 6.46 (d,  $J = 3.5$  Hz,  $1H'$ ), 6.43 (d,  $J = 3.5$  Hz,  $1H^*$ ), 5.68 – 5.55 (m,  $1H^*+1H'$ ), 5.35 – 5.24 (m,  $2H^*$ ), 5.07 – 4.98 (m,  $2H'$ ), 4.90 (td,  $J = 9.6, 3.9$  Hz,  $1H'$ ), 4.80 (td,  $J = 10.5, 3.5$  Hz,  $1H^*$ ), 4.39 – 4.33 (m,  $1H'$ ), 4.32 – 4.23 (m,  $1H^*+1H'$ ), 4.20 – 4.13 (m,  $1H^*+1H'$ ), 4.02 (dd,  $J = 18.0, 10.2$  Hz,  $1H^*$ ), 3.50 – 3.38 (m,  $1H^*+1H'$ ), 3.07 (qd,  $J = 10.9, 2.9$  Hz,  $1H^*$ ), 2.98 (qd,  $J = 10.2, 3.2$  Hz,  $1H'$ ), 2.14 – 2.05 (m,  $1H'$ ), 1.89 – 1.79 (m,  $1H^*$ ), 1.79 – 1.70 (m,  $1H'$ ), 1.69 – 1.60 (m,  $1H^*$ ).

$^{13}C$  NMR (126 MHz,  $CDCl_3$ )  $\delta$  197.6, 197.3, 168.6, 168.5, 157.6, 157.5, 146.4, 138.0, 137.3, 136.7, 136.6, 134.2, 134.0, 133.5, 133.4, 131.8, 131.6, 128.8, 128.7, 128.2<sub>1</sub>, 128.1<sub>7</sub>, 127.8, 127.7, 123.5, 123.4, 120.3, 120.2, 120.1, 119.1, 114.1, 114.0, 63.3, 62.9, 50.3, 50.0, 44.8, 44.1, 38.9, 38.3, 30.7, 30.0. One peak missing due to overlap.

HRMS (ESI) calcd for  $C_{27}H_{23}NO_6Br$   $[M+H]^+$ : 536.07033, found: 536.07027.

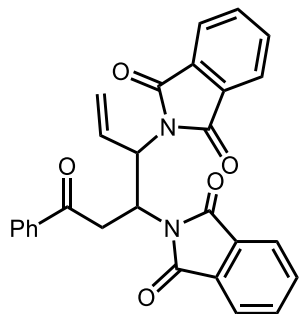

**2,2'-(6-Oxo-6-phenylhex-1-ene-3,4-diyl)bis(isoindoline-1,3-dione) (7ap):** (SGS-6-8) Prepared following **General procedure C** using 2-(3-oxo-3-phenylprop-1-en-1-yl)isoindoline-1,3-dione (**6a**, 55.5

mg, 0.2 mmol, 1.0 equiv), 2-allylisoindoline-1,3-dione (**1p**, 124.7 mg, 0.6 mmol, 3.0 equiv), and LiNTf<sub>2</sub> (46.0 mg, 0.16 mmol, 0.8 equiv). The reaction mixture was heated at 80 °C for 16 h. The crude reaction mixture was purified by flash column chromatography (hexanes/ethyl acetate = 10:1) to afford the title compound as a yellow oil (69.4 mg, 75%, 1.1:1 d.r.).

<sup>1</sup>H NMR (500 MHz, CDCl<sub>3</sub>) δ 7.92 – 7.87 (m, 2H'), 7.86 – 7.77 (m, 2H\*+1H'), 7.75 – 7.65 (m, 4H\*+4H'), 7.66 – 7.61 (m, 2H), 7.61 – 7.57 (m, 2H), 7.53 (t, J = 7.4 Hz, 1H'), 7.47 (t, J = 7.4 Hz, 1H\*), 7.42 (t, J = 7.7 Hz, 2H'), 7.35 (t, J = 7.8 Hz, 2H\*), 6.58 (dt, J = 17.1, 9.9 Hz, 1H'), 6.42 (dt, J = 17.1, 9.8 Hz, 1H\*), 5.73 (td, J = 9.8, 4.1 Hz, 1H'), 5.66 – 5.55 (m, 1H\*+1H'), 5.49 – 5.37 (m, 1H\*+2H'), 5.30 (d, J = 17.1 Hz, 1H\*), 5.14 (d, J = 10.2 Hz, 1H\*), 4.25 – 4.13 (m, 1H\*+1H'), 3.49 (dd, J = 18.1, 3.9 Hz, 1H\*), 3.34 (dd, J = 17.8, 4.1 Hz, 1H').

<sup>13</sup>C NMR (126 MHz, CDCl<sub>3</sub>) δ 196.7, 196.5, 168.3, 168.0, 167.8, 136.7, 136.5, 134.4, 134.2, 134.1, 133.6, 133.5, 132.5, 132.1, 131.9<sub>3</sub>, 131.9<sub>0</sub>, 131.8, 131.7, 128.9, 128.8, 128.3<sub>0</sub>, 128.2<sub>9</sub>, 123.7, 123.6, 123.6, 122.6, 121.6, 56.5, 55.9, 48.1<sub>0</sub>, 48.0<sub>5</sub>, 37.9, 37.5. Three peaks missing due to overlap.

HRMS (ESI) calcd for C<sub>28</sub>H<sub>21</sub>N<sub>2</sub>O<sub>5</sub> [M+H]<sup>+</sup>: 465.14450, found: 465.14344.

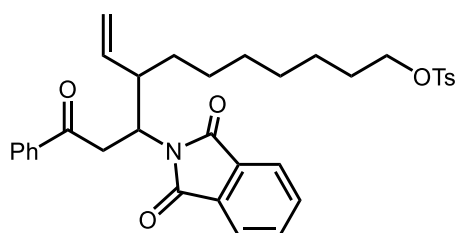

**9-(1,3-Dioxoisindolin-2-yl)-11-oxo-11-phenyl-8-vinylundecyl 4-methylbenzenesulfonate (7am):** (SGS-6-18) Prepared following **General procedure D** using 2-(3-oxo-3-phenylprop-1-en-1-yl)isoindoline-1,3-dione (**6a**, 55.5 mg, 0.2 mmol, 1.0 equiv) and dec-9-en-1-yl 4-methylbenzenesulfonate (**1m**, 279.4 mg, 0.6 mmol, 3.0 equiv). The reaction mixture was heated at 80 °C for 16 h. The crude reaction mixture was purified by flash column chromatography (hexanes/ethyl acetate = 10:1) to afford the title compound as a brown oil (91.8 mg, 78%, 1.1:1 d.r.).

<sup>1</sup>H NMR (500 MHz, CDCl<sub>3</sub>) δ 7.85 – 7.80 (m, 2H\*), 7.80 – 7.76 (m, 2H'), 7.74 – 7.63 (m, 4H\*+4H'), 7.61 – 7.57 (m, 2H'), 7.57 – 7.53 (m, 2H\*), 7.46 – 7.38 (m, 1H\*+1H'), 7.35 – 7.28 (m, 2H\*+2H'), 7.26 – 7.21 (m, 2H\*+2H'), 5.43 (ddt, J = 27.1, 17.0, 10.0 Hz, 1H\*+1H'), 5.17 – 5.06 (m, 2H'), 4.87 – 4.76 (m, 2H\*), 4.70 (td, J = 9.9, 3.8 Hz, 1H\*), 4.62 (td, J = 10.5, 3.4 Hz, 1H'), 4.01 (dd, J = 17.8, 9.9 Hz, 1H\*), 3.95 – 3.80 (m, 2H\*+3H'), 3.35 (dd, J = 17.9, 3.4 Hz, 1H'), 3.29 (dd, J = 17.8, 3.8 Hz, 1H\*), 2.80 – 2.63 (m, 1H\*+1H'), 2.34 (s, 3H\*), 2.34 (s, 3H'), 1.56 – 1.37 (m, 4H\*+4H'), 1.28 – 0.93 (m, 10H\*+10H').

<sup>13</sup>C NMR (126 MHz, CDCl<sub>3</sub>) δ 198.0, 197.7, 168.6, 144.8, 144.7, 139.5, 138.9, 136.8, 134.1, 133.9, 133.4, 133.3, 131.9, 131.8, 129.9<sub>4</sub>, 129.9<sub>2</sub>, 128.8, 128.7, 128.2<sub>1</sub>, 128.1<sub>8</sub>, 128.0<sub>2</sub>, 128.0<sub>1</sub>, 123.4, 123.3, 118.8, 117.8, 70.8, 50.6, 50.3, 47.7, 47.0, 38.9, 38.5, 31.8, 30.9, 29.5, 29.2, 29.0, 28.9<sub>2</sub>, 28.9<sub>0</sub>, 28.9, 27.2, 26.7, 25.4, 25.3, 21.8. Four peaks missing due to overlap.

HRMS (ESI) calcd for C<sub>34</sub>H<sub>38</sub>NO<sub>6</sub>S [M+H]<sup>+</sup>: 588.24144, found: 588.24084.

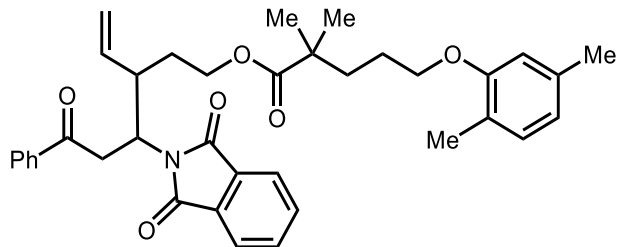

**4-(1,3-Dioxoisindolin-2-yl)-6-oxo-6-phenyl-3-vinylhexyl 5-(2,5-dimethylphenoxy)-2,2-dimethylpentanoate (7aq):** (SGS-6-17) Prepared following **General procedure D** using 2-(3-oxo-3-phenylprop-1-en-1-yl)isoindoline-1,3-dione (**6a**, 55.5 mg, 0.2 mmol, 1.0 equiv) and pent-4-en-1-yl 5-(2,5-dimethylphenoxy)-2,2-dimethylpentanoate (**1q**, 273.9 mg, 0.6 mmol, 3.0 equiv). The reaction mixture was heated at 80 °C for 16 h. The crude reaction mixture was purified by flash column chromatography (hexanes/ethyl acetate = 10:1) to afford the title compound as a yellow oil (71.4 mg, 60%, 1.1:1 d.r.).

<sup>1</sup>H NMR (500 MHz, CDCl<sub>3</sub>) δ 7.85 – 7.81 (m, 2H'), 7.81 – 7.77 (m, 2H\*), 7.71 – 7.65 (m, 2H\*+2H'), 7.60 – 7.54 (m, 2H\*+2H'), 7.47 – 7.40 (m, 1H\*+1H'), 7.34 – 7.30 (m, 2H\*+2H'), 6.90 (dd, *J* = 7.4, 3.2 Hz, 1H\*+1H'), 6.60 – 6.55 (m, 1H\*+1H'), 6.53 (d, *J* = 11.4 Hz, 1H\*+1H'), 5.57 – 5.43 (m, 1H\*+1H'), 5.26 – 5.15 (m, 2H\*), 4.95 – 4.87 (m, 2H'), 4.79 (td, *J* = 9.7, 3.9 Hz, 1H'), 4.70 (td, *J* = 10.5, 3.5 Hz, 1H\*), 4.11 – 3.75 (m, 5H\*+5H'), 3.38 (dd, *J* = 18.0, 3.5 Hz, 1H\*), 3.30 (dd, *J* = 17.8, 3.9 Hz, 1H'), 2.97 (qd, *J* = 11.1, 2.9 Hz, 1H\*), 2.87 (qd, *J* = 10.4, 3.0 Hz, 1H'), 2.22 (s, 3H\*), 2.21 (s, 3H'), 2.08 (s, 3H'), 2.05 (s, 3H\*), 1.95 – 1.86 (m, 1H'), 1.71 – 1.39 (m, 6H\*+5H'), 1.16 (s, 6H'), 1.09 (s, 6H\*).

<sup>13</sup>C NMR (126 MHz, CDCl<sub>3</sub>) δ 197.7, 197.3, 177.8, 177.7, 168.6, 168.5, 157.1, 138.1, 137.5, 136.7<sub>1</sub>, 136.6<sub>7</sub>, 136.5<sub>5</sub>, 136.5<sub>3</sub>, 134.1<sub>0</sub>, 133.9<sub>6</sub>, 133.5, 133.4, 131.8, 131.7, 130.4<sub>0</sub>, 130.3<sub>9</sub>, 128.8, 128.7, 128.1<sub>7</sub>, 128.1<sub>5</sub>, 123.7, 123.4, 123.3, 120.8<sub>1</sub>, 120.7<sub>7</sub>, 120.0, 118.9, 112.1<sub>2</sub>, 112.0<sub>9</sub>, 68.0, 62.4, 61.9, 50.3, 50.0, 44.8, 44.1, 42.2, 42.1, 38.9, 38.3, 37.2, 37.1, 30.6, 30.0, 25.4, 25.3<sub>3</sub>, 25.2<sub>9</sub>, 25.3, 25.2, 21.5, 15.8<sub>9</sub>, 15.8<sub>6</sub>. Five peaks missing due to overlap.

**HRMS** (ESI) calcd for C<sub>37</sub>H<sub>42</sub>NO<sub>6</sub> [M+H]<sup>+</sup>: 596.30066, found: 596.30116.

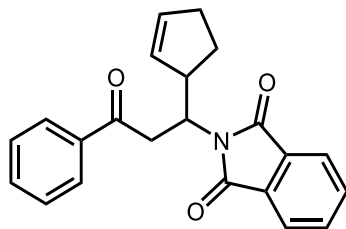

**2-(1-(Cyclopent-2-en-1-yl)-3-oxo-3-phenylpropyl)isoindoline-1,3-dione (7al):** (SGS-6-23)

Prepared following **General procedure D** using 2-(3-oxo-3-phenylprop-1-en-1-yl)isoindoline-1,3-dione (**6a**, 55.5 mg, 0.2 mmol, 1.0 equiv) and cyclopentene (**1l**, 53 μL, 0.6 mmol, 3.0 equiv). The reaction mixture was heated at 80 °C for 16 h. The crude reaction mixture was purified by flash column chromatography (hexanes/ethyl acetate = 10:1) to afford the title compound as a yellow oil (45.3 mg, 65%, 1.2:1 d.r.).

<sup>1</sup>H NMR (500 MHz, CDCl<sub>3</sub>) δ 7.92 (d, *J* = 7.6 Hz, 2H\*+2H'), 7.82 – 7.76 (m, 2H\*+2H'), 7.71 – 7.64 (m, 2H\*+2H'), 7.52 (t, *J* = 7.2 Hz, 1H\*+1H'), 7.42 (t, *J* = 7.5 Hz, 2H\*+2H'), 5.96 – 5.49 (m, 2H\*+2H'), 4.79 – 4.66 (m, 1H\*+1H'), 4.30 – 4.16 (m, 1H\*+1H'), 3.56 – 3.43 (m, 1H\*+1H'), 3.37 – 3.27 (m,

1H\*+1H'), 2.51 – 2.22 (m, 2H\*+2H'), 2.21 – 2.11 (m, 1H'), 1.99 – 1.89 (m, 1H\*), 1.75 – 1.62 (m, 1H\*+1H').

<sup>13</sup>C NMR (126 MHz, CDCl<sub>3</sub>) δ 197.8, 168.9, 168.7, 136.9, 134.2, 134.0, 133.3, 132.0, 130.8<sub>9</sub>, 130.8<sub>7</sub>, 128., 128.2, 123.4, 123.3, 51.8, 51.5, 48.9<sub>3</sub>, 48.8<sub>6</sub>, 38.7, 38.6, 32.4, 31.7, 27.9, 27.2. Eight peaks missing due to overlap.

HRMS (ESI) calcd for C<sub>22</sub>H<sub>20</sub>NO<sub>3</sub> [M+H]<sup>+</sup>: 346.14377, found: 346.14273.

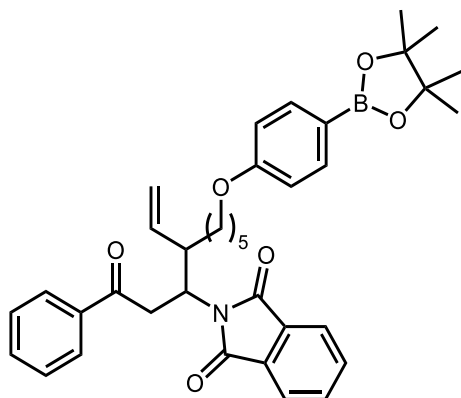

**2-(1-Oxo-1-phenyl-9-(4-(4,4,5,5-tetramethyl-1,3,2-dioxaborolan-2-yl)phenoxy)-4-vinylnonan-3-yl)isoindoline-1,3-dione (7ao):** (SGS-6-53) Prepared following **General procedure D** using 2-(3-oxo-3-phenylprop-1-en-1-yl)isoindoline-1,3-dione (**6a**, 55.5 mg, 0.2 mmol, 1.0 equiv) and 4,4,5,5-tetramethyl-2-(4-(oct-7-en-1-yloxy)phenyl)-1,3,2-dioxaborolane (**1o**, 198.2 mg, 0.6 mmol, 3.0 equiv). The reaction mixture was heated at 80 °C for 16 h. The crude reaction mixture was purified by flash column chromatography (hexanes/ethyl acetate = 5:1) to afford the title compound as a tan foam (75.9 mg, 62%, 1.1:1 d.r.).

<sup>1</sup>H NMR (500 MHz, CDCl<sub>3</sub>) δ 7.92 (d, *J* = 7.5 Hz, 2H'), 7.88 (d, *J* = 7.5 Hz, 2H\*), 7.83 – 7.61 (m, 6H\*+6H'), 7.56 – 7.47 (m, 1H\*+1H'), 7.46 – 7.36 (m, 2H\*+2H'), 6.87 (d, *J* = 8.3 Hz, 2H\*), 6.82 (d, *J* = 8.4 Hz, 2H'), 5.64 – 5.47 (m, 1H\*+1H'), 5.22 (dd, *J* = 20.2, 13.6 Hz, 2H'), 4.99 – 4.88 (m, 2H\*), 4.73 (td, *J* = 10.4, 3.1 Hz, 1H'), 4.81 (td, *J* = 9.9, 3.5 Hz, 1H\*), 4.73 (td, *J* = 10.4, 3.1 Hz, 1H'), 4.13 (dd, *J* = 17.7, 10.0 Hz, 1H\*), 3.99 (m, 2H\*+1H'), 3.88 (t, *J* = 6.4 Hz, 2H'), 3.49 – 3.37 (m, 1H\*+1H'), 2.92 – 2.76 (m, 1H\*+1H'), 1.83 – 1.16 (m, 20H\*+20H').

<sup>13</sup>C NMR (126 MHz, CDCl<sub>3</sub>) δ 197.9, 197.6, 168.6, 161.7<sub>9</sub>, 161.7<sub>7</sub>, 139.4, 138.8, 136.7<sub>9</sub>, 136.7<sub>6</sub>, 136.6, 136.5, 134.0, 133.9, 133.4, 133.3, 131.8<sub>4</sub>, 131.7<sub>7</sub>, 128.7<sub>2</sub>, 128.6<sub>6</sub>, 128.2, 128.1, 123.4, 123.2, 118.9, 117.8, 114.0, 113.9, 83.6, 67.6<sub>9</sub>, 67.6<sub>6</sub>, 50.6, 50.3, 47.6, 47.0, 38.9, 38.4, 31.7, 30.9, 29.2<sub>3</sub>, 29.1<sub>5</sub>, 27.1, 26.7, 26.1, 25.9, 25.0. Three peaks missing due to overlap.

HRMS (ESI) calcd for C<sub>37</sub>H<sub>43</sub>BNO<sub>6</sub> [M+H]<sup>+</sup>: 608.31779, found: 608.31985.

#### 2.4 Synthesis of Michael adducts from Fe-catalyzed Michael addition – Sulfonamides

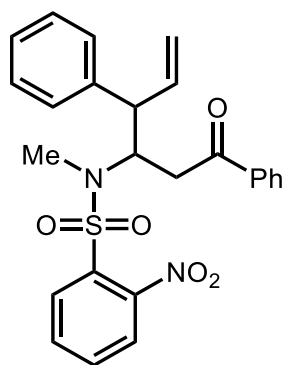

***N*-Methyl-2-nitro-*N*-(1-oxo-1,4-diphenylhex-5-en-3-yl)benzenesulfonamide (9aa):** (SGS-5-184)

Prepared following **General procedure E** using *N*-methyl-2-nitro-*N*-(3-oxo-3-phenylprop-1-en-1-yl)benzenesulfonamide (**8a**, 69.3 mg, 0.2 mmol, 1.0 equiv) and allylbenzene (**1a**, 79  $\mu$ L, 0.6 mmol, 3.0 equiv). The reaction mixture was heated at 60 °C for 16 h. The crude reaction mixture was purified by flash column chromatography (hexanes/ethyl acetate = 5:1) to afford the title compound as a tan foam (66.9 mg, 72%, 1.2:1 d.r.).

**<sup>1</sup>H NMR** (500 MHz, CDCl<sub>3</sub>)  $\delta$  7.97 – 7.94 (m, 1H'), 7.84 – 7.80 (m, 1H\*+1H'), 7.74 (d,  $J$  = 7.9 Hz, 1H\*), 7.56 – 7.38 (m, 6H\*+6H'), 7.29 – 7.23 (m, 3H\*+3H'), 7.18 – 7.12 (m, 1H\*+2H'), 7.10 – 7.05 (m, 2H\*+1H'), 6.11 (dt,  $J$  = 16.9, 9.7 Hz, 1H'), 5.87 (dt,  $J$  = 16.9, 9.9 Hz, 1H\*), 5.10 (d,  $J$  = 4.9 Hz, 1H\*), 5.06 (d,  $J$  = 5.4 Hz, 1H'), 5.02 – 4.90 (m, 1H\*+2H'), 4.87 (dd,  $J$  = 10.0, 1.2 Hz, 1H\*), 3.65 – 3.57 (m, 2H'), 3.46 (dd,  $J$  = 17.4, 6.7 Hz, 1H\*), 3.25 (dd,  $J$  = 17.4, 4.2 Hz, 1H\*), 3.05 (s, 3H'), 3.03 – 2.90 (m, 4H\*+1H'). Throughout analysis of diastereomeric mixtures, H\* indicates the major diastereomer, while H' indicates the minor diastereomer.

**<sup>13</sup>C NMR** (126 MHz, CDCl<sub>3</sub>)  $\delta$  196.8<sub>3</sub>, 196.7<sub>6</sub>, 147.9, 147.6, 140.8, 140.5, 138.6, 138.3, 136.6, 136.2, 133.9, 133.4, 133.3, 133.2<sub>4</sub>, 133.1<sub>6</sub>, 131.7, 131.5, 131.4, 131.3, 129.2, 128.7<sub>3</sub>, 128.6<sub>5</sub>, 128.5, 128.4, 128.1, 128.0, 127.7, 127.5, 126.9, 124.4, 123.7, 117.7, 117.0, 59.1, 57.7, 55.6, 54.9, 41.0, 39.4. Two peaks missing due to overlap.

**HRMS** (ESI) calcd for C<sub>25</sub>H<sub>25</sub>N<sub>2</sub>O<sub>5</sub>S [M+H]<sup>+</sup>: 465.14787, found: 465.14707.

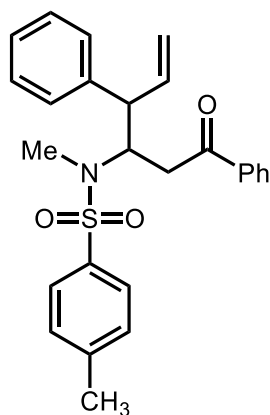

***N*,4-Dimethyl-*N*-(1-oxo-1,4-diphenylhex-5-en-3-yl)benzenesulfonamide (9ca):** (SGS-6-20)

Prepared following **General procedure E** using *N*,4-dimethyl-*N*-(3-oxo-3-phenylprop-1-en-1-yl)benzenesulfonamide (**8c**, 63.1 mg, 0.2 mmol, 1.0 equiv) and allylbenzene (**1a**, 79  $\mu$ L, 0.6 mmol, 3.0 equiv). The reaction mixture was heated at 60 °C for 16 h. The crude reaction mixture was purified by

flash column chromatography (hexanes/ethyl acetate = 10:1) to afford the title compound as a tan foam (48.3 mg, 56%, 1.2:1 d.r.).

$^1\text{H NMR}$  (400 MHz,  $\text{CDCl}_3$ )  $\delta$  7.76 (d,  $J = 7.9$  Hz, 2H'), 7.59 – 7.04 (m, 14H\*+10H'), 6.98 (d,  $J = 7.9$  Hz, 2H'), 6.24 – 6.07 (m, 1H\*), 5.93 (dt,  $J = 17.2, 9.8$  Hz, 1H'), 5.16 – 4.83 (m, 3H\*+3H'), 3.69 – 3.52 (m, 1H\*+1H'), 3.30 (dd,  $J = 17.3, 6.3$  Hz, 1H'), 3.03 (dd,  $J = 17.3, 5.1$  Hz, 1H'), 2.96 – 2.75 (m, 5H\*), 2.68 (s, 3H'), 2.29 (s, 3H\*), 2.24 (s, 3H').

$^{13}\text{C NMR}$  (101 MHz,  $\text{CDCl}_3$ )  $\delta$  197.1, 196.9, 142.9, 142.9, 141.4, 140.9, 139.1, 138.8, 137.6, 136.8, 136.7, 136.3, 133.2, 133.1, 129.5, 129.4, 129.1, 128.8, 128.6, 128.5, 128.4, 128.1, 128.0, 127.4, 127.3, 127.0, 117.4, 116.8, 59.3, 57.6, 56.1, 55.1, 40.0, 39.6, 31.5, 30.5, 21.5<sub>1</sub>, 21.4<sub>6</sub>. Two peaks missing due to overlap.

**HRMS** (ESI) calcd for  $\text{C}_{26}\text{H}_{28}\text{NO}_3\text{S}$   $[\text{M}+\text{H}]^+$ : 434.17844, found: 434.17736.

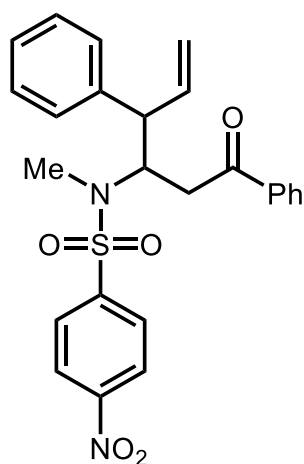

***N*-Methyl-4-nitro-*N*-(1-oxo-1,4-diphenylhex-5-en-3-yl)benzenesulfonamide (9ba)**: (SGS-5-168-8) Prepared following **General procedure E** using *N*-methyl-4-nitro-*N*-(3-oxo-3-phenylprop-1-en-1-yl)benzenesulfonamide (**8b**, 69.3 mg, 0.2 mmol, 1.0 equiv) and allylbenzene (**1a**, 79  $\mu\text{L}$ , 0.6 mmol, 3.0 equiv). The reaction mixture was heated at 60 °C for 16 h. The crude reaction mixture was purified by flash column chromatography (hexanes/ethyl acetate = 10:1) to afford the title compound as a tan foam (62.2 mg, 67%, 1.1:1 d.r.).

$^1\text{H NMR}$  (500 MHz,  $\text{CDCl}_3$ )  $\delta$  8.02 – 7.98 (m, 2H\*), 7.93 – 7.88 (m, 2H'), 7.75 – 7.71 (m, 2H\*), 7.69 – 7.65 (m, 2H'), 7.51 – 7.14 (m, 10H\*+10H'), 6.14 (dt,  $J = 16.9, 9.8$  Hz, 1H\*), 5.90 (dt,  $J = 16.9, 9.9$  Hz, 1H'), 5.15 – 4.92 (m, 2H\*+2H'), 4.92 – 4.82 (m, 1H\*+1H'), 3.61 (t,  $J = 10.0$  Hz, 1H'), 3.50 (t,  $J = 9.9$  Hz, 1H\*), 3.31 (dd,  $J = 17.2, 5.3$  Hz, 1H'), 3.11 (dd,  $J = 17.2, 6.8$  Hz, 1H'), 2.90 (s, 3H\*), 2.82 – 2.77 (m, 2H\*), 2.74 (s, 3H').

$^{13}\text{C NMR}$  (126 MHz,  $\text{CDCl}_3$ )  $\delta$  196.8, 196.7, 149.7, 149.6, 146.3, 145.7, 141.1, 140.7, 138.6, 138.1, 136.2, 135.7, 133.7, 129.4, 129.0, 128.8, 128.7, 128.4, 128.3, 128.3, 128.1, 128.0<sub>1</sub>, 127.9<sub>9</sub>, 127.7, 127.3, 124.0, 118.2, 117.4, 60.1, 58.9, 55.8, 55.3, 40.0, 39.1. Two peaks missing due to overlap.

**HRMS** (ESI) calcd for  $\text{C}_{25}\text{H}_{25}\text{N}_2\text{O}_5\text{S}$   $[\text{M}+\text{H}]^+$ : 465.14787, found: 465.14648.



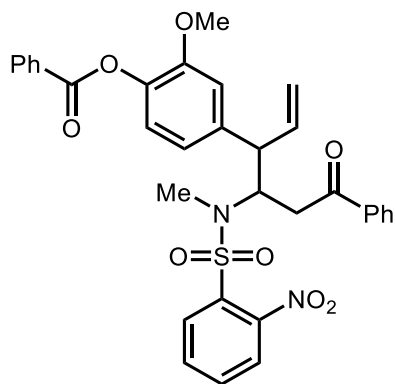

**2-Methoxy-4-((N-methyl-2-nitrophenyl)sulfonamido)-6-oxo-6-phenylhex-1-en-3-yl)phenyl benzoate (9af):** (SGS-6-30) Prepared following **General procedure E** using *N*-methyl-2-nitro-*N*-(3-oxo-3-phenylprop-1-en-1-yl)benzenesulfonamide (**8a**, 69.3 mg, 0.2 mmol, 1.0 equiv) and 2-methoxy-4-(6-oxo-4,6-diphenylhex-1-en-3-yl)phenyl benzoate (**1f**, 160.9 mg, 0.6 mmol, 3.0 equiv). The reaction mixture was heated at 60 °C for 16 h. The crude reaction mixture was purified by flash column chromatography (hexanes/ethyl acetate = 10:1) to afford the title compound as a brown foam (96.4 mg, 78%, 1.6:1 d.r.).

<sup>1</sup>H NMR (500 MHz, CDCl<sub>3</sub>) δ 8.19 (t, *J* = 6.5 Hz, 2H\*+2H'), 7.97 – 7.91 (m, 1H'), 7.83 (d, *J* = 7.6 Hz, 1H\*+1H'), 7.77 – 7.71 (m, 1H\*), 7.67 – 7.31 (m, 10H\*+10H'), 7.06 (d, *J* = 8.0 Hz, 1H'), 6.97 – 6.83 (m, 2H\*+2H'), 6.76 (d, *J* = 7.9 Hz, 1H\*), 6.15 – 6.04 (m, 1H'), 5.95 – 5.84 (m, 1H\*), 5.18 – 5.06 (m, 1H\*+1H'), 5.04 – 4.89 (m, 2H\*+2H'), 3.79 (s, 3H'), 3.78 (s, 3H\*), 3.73 – 3.59 (m, 2H'), 3.49 (dd, *J* = 17.2, 6.2 Hz, 1H\*), 3.33 – 3.23 (m, 1H\*), 3.15 – 2.92 (m, 4H\*+4H').

<sup>13</sup>C NMR (126 MHz, CDCl<sub>3</sub>) δ 197.0, 196.9, 164.7, 151.8, 151.4, 148.0, 147.8, 139.8, 139.5, 139.3, 138.9, 138.3, 137.9, 136.5, 136.2, 133.8, 133.7, 133.6, 133.5, 133.4, 133.3<sub>3</sub>, 133.2<sub>6</sub>, 133.0, 131.7, 131.5, 131.1, 131.0, 130.4, 129.6, 129.5, 128.8, 128.7, 128.6<sub>3</sub>, 128.6<sub>0</sub>, 128.1<sub>1</sub>, 128.1<sub>0</sub>, 124.5, 123.7, 123.4, 122.9, 120.6, 119.6, 118.0, 117.2, 112.5, 59.2, 58.0, 56.2, 56.1, 55.4, 54.7, 40.9, 39.6.

**HRMS** (ESI) calcd for C<sub>33</sub>H<sub>31</sub>N<sub>2</sub>O<sub>8</sub>S [M+H]<sup>+</sup>: 615.17956, found: 615.17866.

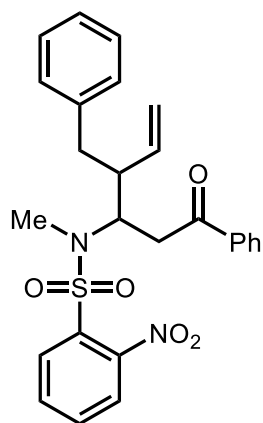

***N*-(4-benzyl-1-oxo-1-phenylhex-5-en-3-yl)-*N*-methyl-2-nitrobenzenesulfonamide (9ak):** (SGS-6-19) Prepared following **General procedure E** using *N*-methyl-2-nitro-*N*-(3-oxo-3-phenylprop-1-en-1-yl)benzenesulfonamide (**8a**, 69.3 mg, 0.2 mmol, 1.0 equiv) and 4-phenyl-1-butene (**1k**, 90 μL, 0.6 mmol, 3.0 equiv). The reaction mixture was heated at 60 °C for 16 h. The crude reaction mixture was purified by

flash column chromatography (hexanes/ethyl acetate = 10:1) to afford the title compound as a yellow foam (37.7 mg, 40%, 1.1:1 d.r.).

$^1\text{H NMR}$  (500 MHz,  $\text{CDCl}_3$ )  $\delta$  8.10 (dd,  $J = 7.6, 0.6$  Hz, 1H'), 8.09 – 8.04 (m, 1H\*), 7.82 (d,  $J = 7.6$  Hz, 2H\*), 7.74 (d,  $J = 7.5$  Hz, 2H'), 7.64 – 7.37 (m, 6H\*+6H'), 7.25 – 7.11 (m, 3H\*+3H'), 7.07 (d,  $J = 7.4$  Hz, 2H\*+2H'), 5.58 (dt,  $J = 17.1, 9.9$  Hz, 1H\*), 5.46 (dt,  $J = 17.1, 9.8$  Hz, 1H'), 4.91 – 4.59 (m, 3H\*+3H'), 3.40 (dd,  $J = 17.3, 7.2$  Hz, 1H\*), 3.31 (dd,  $J = 17.1, 6.7$  Hz, 1H'), 3.16 – 3.09 (m, 3H'+1H\*), 3.05 – 2.98 (m, 3H\*+1H'), 2.95 (dd,  $J = 17.1, 4.4$  Hz, 1H\*), 2.80 – 2.48 (m, 2H\*+2H'), 2.31 (dd,  $J = 13.6, 10.9$  Hz, 1H').

$^{13}\text{C NMR}$  (126 MHz,  $\text{CDCl}_3$ )  $\delta$  196.8, 196.6, 147.9, 147.8, 139.8, 139.5, 137.8, 137.6, 136.6, 136.5, 133.7, 133.5, 133.4, 133.4, 133.3, 132.0, 131.8<sub>1</sub>, 131.7<sub>8</sub>, 131.7, 129.4, 129.3, 128.8, 128.7, 128.3, 128.1, 128.0, 126.2, 126.1, 124.0, 123.9, 119.2, 118.6, 57.1, 56.5, 51.4, 50.4, 40.4, 40.3, 38.5, 38.1, 31.5, 30.6. Two peaks missing due to overlap.

**HRMS** (ESI) calcd for  $\text{C}_{26}\text{H}_{27}\text{N}_2\text{O}_5\text{S}$   $[\text{M}+\text{H}]^+$ : 479.16352, found: 479.16176.

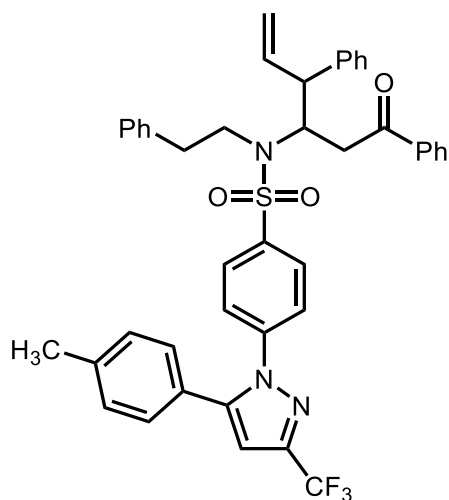

***N*-(1-Oxo-1,4-diphenylhex-5-en-3-yl)-*N*-phenethyl-4-(5-(*p*-tolyl)-3-(trifluoromethyl)-1H-pyrazol-1-yl)benzenesulfonamide (9da)**: (SGS-6-63) Prepared following **General procedure E** using *N*-(3-oxo-3-phenylprop-1-en-1-yl)-*N*-phenethyl-4-(5-(*p*-tolyl)-3-(trifluoromethyl)-1H-pyrazol-1-yl)benzenesulfonamide (**8d**, 123.1 mg, 0.2 mmol, 1.0 equiv) and allylbenzene (**1a**, 79  $\mu\text{L}$ , 0.6 mmol, 3.0 equiv). The reaction mixture was heated at 60 °C for 16 h. The crude reaction mixture was purified by flash column chromatography (hexanes/ethyl acetate = 10:1) to afford the title compound as a very sticky brown solid, which trapped ethyl acetate despite significant removal attempts. (104.5 mg, 70%, 1.1:1 d.r.).  $^1\text{H NMR}$  (500 MHz,  $\text{CDCl}_3$ )  $\delta$  7.84 – 7.78 (t,  $J = 7.4$  Hz, 2H\*+2H'), 7.56 – 7.48 (m, 1H\*+1H'), 7.45 – 7.37 (dd,  $J = 16.7, 8.4$  Hz, 2H\*+2H'), 7.35 – 7.14 (m, 12H\*+12H'), 7.13 – 6.98 (m, 6H\*+6H'), 6.69 (s, 1H\*), 6.68 (s, 1H'), 6.19 – 6.07 (m, 1H'), 5.77 (dt,  $J = 16.9, 9.9$  Hz, 1H\*), 5.14 – 4.79 (m, 3H\*+3H'), 3.81 – 3.60 (m, 1H\*+1H'), 3.59 – 3.27 (m, 2H\*+2H'), 3.21 – 2.56 (m, 4H\*+4H'), 2.32 (s, 3H\*), 2.28 (s, 3H').  $^{13}\text{C NMR}$  (151 MHz,  $\text{CDCl}_3$ )  $\delta$  197.0, 196.6, 145.2<sub>4</sub>, 145.2<sub>1</sub>, 144.0<sub>6</sub> (q,  $J = 38.5$  Hz), 144.0<sub>4</sub> (q,  $J = 38.5$  Hz), 142.3<sub>4</sub>, 142.3<sub>2</sub>, 141.3, 140.6, 140.5, 139.8<sub>3</sub>, 139.8<sub>1</sub>, 139.6, 139.2, 139.0, 138.8, 138.6<sub>3</sub>, 136.5<sub>5</sub>, 136.2, 133.4, 133.3, 129.8, 129.0, 128.9, 128.9, 128.8<sub>4</sub>, 128.8<sub>1</sub>, 128.7<sub>7</sub>, 128.7<sub>6</sub>, 128.7, 128.5<sub>7</sub>, 128.5<sub>5</sub>, 128.5, 128.2, 128.1, 127.9, 127.5, 127.2, 126.8<sub>2</sub>, 126.7<sub>7</sub>, 125.9, 125.3<sub>0</sub>, 125.2<sub>7</sub>, 121.2 (q,  $J = 269.1$  Hz), 117.6, 117.4, 106.3, 56.9, 55.6, 42.4, 41.3, 36.9, 36.4, 29.8, 21.4<sub>1</sub>, 21.3<sub>7</sub>. Six peaks missing due to overlap.

$^{19}\text{F}$  NMR (471 MHz,  $\text{CDCl}_3$ )  $\delta$  -62.40. One peak missing due to overlap.

HRMS (ESI) calcd for  $\text{C}_{43}\text{H}_{39}\text{N}_3\text{O}_3\text{F}_3\text{S}$   $[\text{M}+\text{H}]^+$ : 734.26587, found: 734.26482.

## 2.5 Synthesis of Michael acceptor substrates

### 2.5.1 Maleimide Michael Acceptors

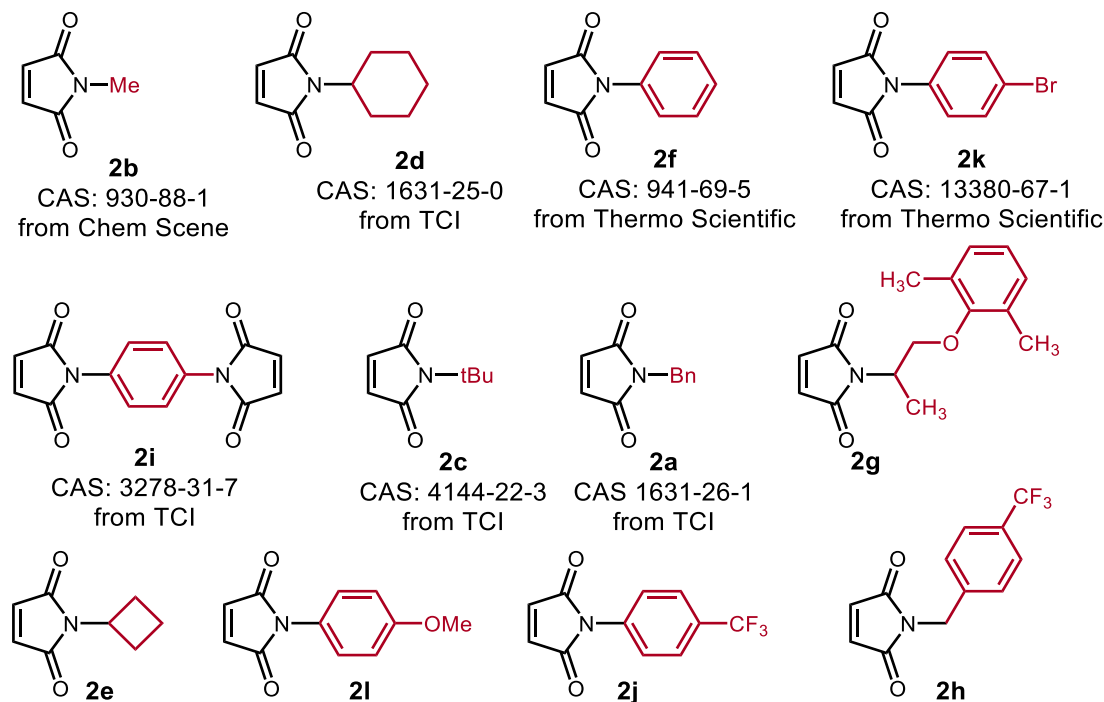

Maleimides **2a**, **2b**, **2c**, **2d**, **2f**, **2i**, and **2k** are commercial and were used directly without further purification.

Maleimides **2e**,<sup>2</sup> **2h**,<sup>3</sup> **2j**,<sup>4</sup> and **2l**<sup>5</sup> were synthesized according to a known literature procedure and have been previously characterized.

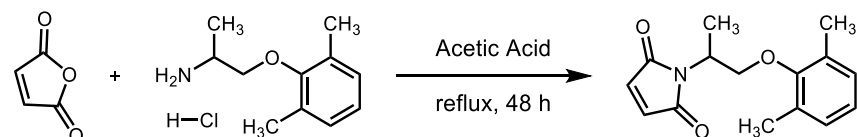

### 1-(1-(2,6-Dimethylphenoxy)propan-2-yl)-1H-pyrrole-2,5-dione (**2g**): (SGS-5-191)

Mexiletine hydrochloride (647 mg, 3.0 mmol, 1.0 equiv) (note that the hydrochloride salt was simply chosen for the commercial availability of the compound and had no additional bearing on the reaction) and maleic anhydride (588.4 mg, 6.0 mmol, 2.0 equiv) were suspended in glacial acetic acid (4.5 mL). The reaction was refluxed with stirring at 125 °C for 48 hours. The reaction mixture was then cooled to room temperature and transferred to a 500 mL beaker. Saturated aqueous sodium bicarbonate was added until no additional gas evolution was observed. Ethyl acetate was added and the mixture was extracted with ethyl acetate. The combined organic fractions were washed with a 1N HCl solution, followed by a brine solution, and were then dried with magnesium sulfate, filtered, and concentrated. The crude product was purified by flash column chromatography on silica (ethyl acetate/hexanes = 3:1), affording **2g** (165.7 mg, 21% yield) as off white solid.

<sup>1</sup>H NMR (500 MHz, CDCl<sub>3</sub>) δ 6.97 (d, *J* = 7.5 Hz, 2H), 6.89 (dd, *J* = 8.0, 6.9 Hz, 1H), 6.70 (s, 2H), 4.71 – 4.62 (m, 1H), 4.23 (t, *J* = 9.3 Hz, 1H), 3.80 (dd, *J* = 9.4, 5.5 Hz, 1H), 2.20 (s, 6H), 1.46 (d, *J* = 7.1 Hz, 3H).

<sup>13</sup>C NMR (126 MHz, CDCl<sub>3</sub>) δ 171.0, 155.3, 134.2, 130.8, 129.0, 124.1, 71.6, 47.2, 16.3, 15.2.

HRMS (ESI) calcd for C<sub>15</sub>H<sub>18</sub>O<sub>3</sub>N [M+H]<sup>+</sup>: 260.12812, found: 260.12816.

m.p. = 64 – 65 °C

### 2.5.2 *N*-Acyl oxazolidinone Michael Acceptors

All Michael acceptor starting materials were synthesized with an E/Z of >20% by NMR.

*N*-Acyl oxazolidinone Michael Acceptors **4a** and **4b** were synthesized according to a known literature procedure and have been previously characterized.<sup>6</sup>

### 2.5.3 Phthalimide protected Michael Acceptors

All Michael acceptor starting materials were synthesized with an E/Z of >20% by NMR.

The Michael acceptor **6a** was synthesized according a literature procedure and has been previously characterized.<sup>7</sup>

### 2.5.4 Sulfonamide protected Michael Acceptors:

All Michael acceptor starting materials were synthesized with an E/Z of >20% by NMR.

**General Procedure F:** Synthesis of sulfonamide protected Michael acceptors from alkynesones

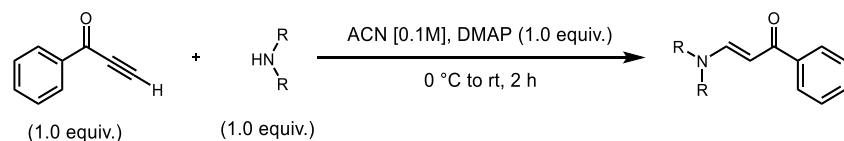

To a flame dried round bottom flask containing the sulfonamide (2.0 mmol, 1.0 equiv) and DMAP (2.0 mmol 1.0 equiv) was added acetonitrile [0.1 M]. Alkyne was dissolved in minimal acetonitrile and then added dropwise at 0 °C with rapid stirring. Minimal color change upon alkyne addition is preferable, with poor yields observed with significant darkening of the reaction mixture. The reaction was stirred for two hours, gradually warming to room temperature. The mixture was filtered through a celite plug, then concentrated to dryness and purified by column chromatography.

The sulfonamide protected Michael acceptors **8b** and **8c** were synthesized according to General Procedure F and have been previously characterized.<sup>8</sup>

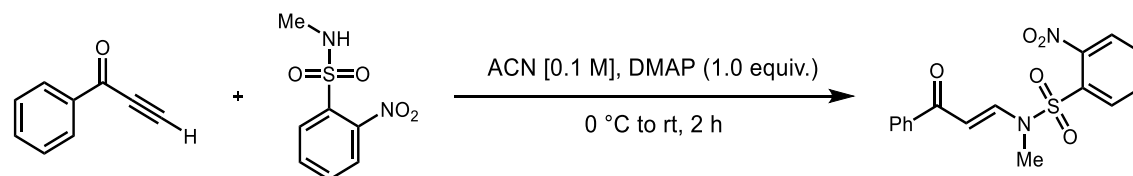

***N*-methyl-2-nitro-*N*-(3-oxo-3-phenylprop-1-en-1-yl)benzenesulfonamide (8a):** (SGS-5-181)

Prepared following **General Procedure F:** The crude product was purified by flash column chromatography on silica (ethyl acetate/hexanes = 2:1), affording **8a** (0.3027 g, 70% yield) as off white solid.

$^1\text{H NMR}$  (500 MHz,  $\text{CDCl}_3$ )  $\delta$  8.20 (d,  $J = 13.5$  Hz, 1H), 8.12 (dd,  $J = 7.5, 1.7$  Hz, 1H), 7.93 – 7.89 (m, 2H), 7.82 – 7.73 (m, 3H), 7.56 (t,  $J = 7.4$  Hz, 1H), 7.47 (t,  $J = 7.6$  Hz, 2H), 6.28 (d,  $J = 13.5$  Hz, 1H), 3.30 (s, 3H).

$^{13}\text{C NMR}$  (126 MHz,  $\text{CDCl}_3$ )  $\delta$  189.5, 143.1, 138.4, 135.1, 132.8, 132.6, 131.5, 131.3, 128.7, 128.3, 125.1, 104.6, 33.5.

**HRMS** (ESI) calcd for  $\text{C}_{16}\text{H}_{15}\text{O}_5\text{N}_2\text{S}$   $[\text{M}+\text{H}]^+$ : 347.06962, found: 347.07065.

**m.p.** = 158 – 159 °C

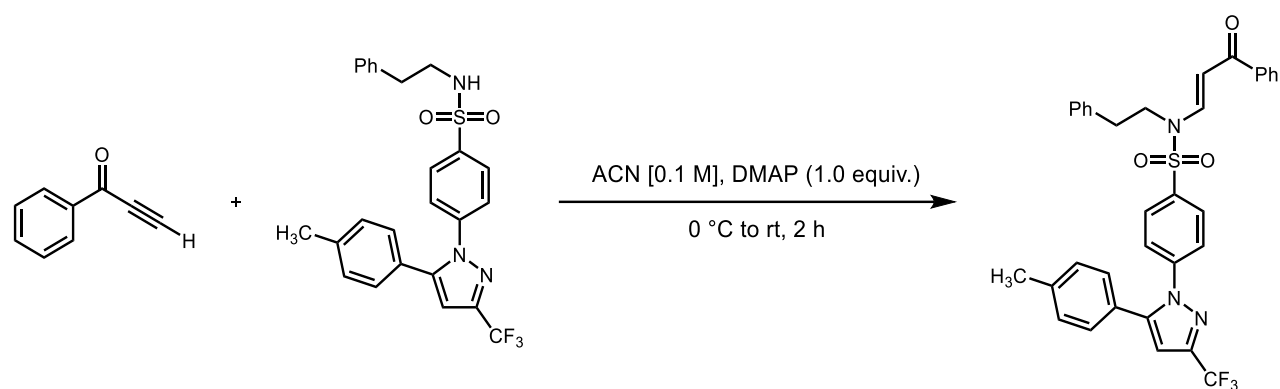

***N*-(3-oxo-3-phenylprop-1-en-1-yl)-*N*-phenethyl-4-(5-(*p*-tolyl)-3-(trifluoromethyl)-1*H*-pyrazol-1-yl)benzenesulfonamide (**8d**):** (SGS-5-183)

*Step 1.* *N*-phenethyl-4-(5-(*p*-tolyl)-3-(trifluoromethyl)-1*H*-pyrazol-1-yl)benzenesulfonamide was synthesized according to a known literature procedure and has been previously characterized.<sup>9</sup>

*Step 2.* Prepared following **General Procedure F**: The crude product was purified by flash column chromatography on silica (ethyl acetate/hexanes = 5:1), affording **8d** (0.2745 g, 73% yield) as yellow foam.

$^1\text{H NMR}$  (500 MHz,  $\text{CDCl}_3$ ) 8.23 (d,  $J = 13.7$  Hz, 1H), 7.85 – 7.79 (m, 4H), 7.55 (t,  $J = 7.4$  Hz, 1H), 7.52 – 7.43 (m, 4H), 7.33 (t,  $J = 7.4$  Hz, 2H), 7.28 – 7.22 (m, 1H), 7.20 (d,  $J = 7.1$  Hz, 2H), 7.14 (d,  $J = 7.9$  Hz, 2H), 7.08 (d,  $J = 8.1$  Hz, 2H), 6.72 (s, 1H), 6.21 (d,  $J = 13.7$  Hz, 1H), 3.75 – 3.68 (m, 2H), 3.01 – 2.91 (m, 2H), 2.35 (s, 3H).

$^{13}\text{C NMR}$  (126 MHz,  $\text{CDCl}_3$ ) 189.3, 145.5, 144.5 (q,  $J = 38.9$  Hz), 143.6, 142.3, 140.2, 138.5, 137.5, 137.4, 132.7, 123.0, 129.1, 128.8, 128.7, 128.4, 128.2, 127.3, 125.9, 125.7, 121.1 (q,  $J = 269.3$  Hz), 106.8, 103.7, 48.2, 33.9, 21.5.

$^{19}\text{F NMR}$  (471 MHz,  $\text{CDCl}_3$ )  $\delta$  –62.55.

**HRMS** (ESI) calcd for  $\text{C}_{34}\text{H}_{29}\text{O}_3\text{N}_3\text{F}_3\text{S}$   $[\text{M}+\text{H}]^+$ : 616.18762, found: 616.18750.

**m.p.** = 86 – 91 °C

## 2.6 Synthesis of alkene substrates

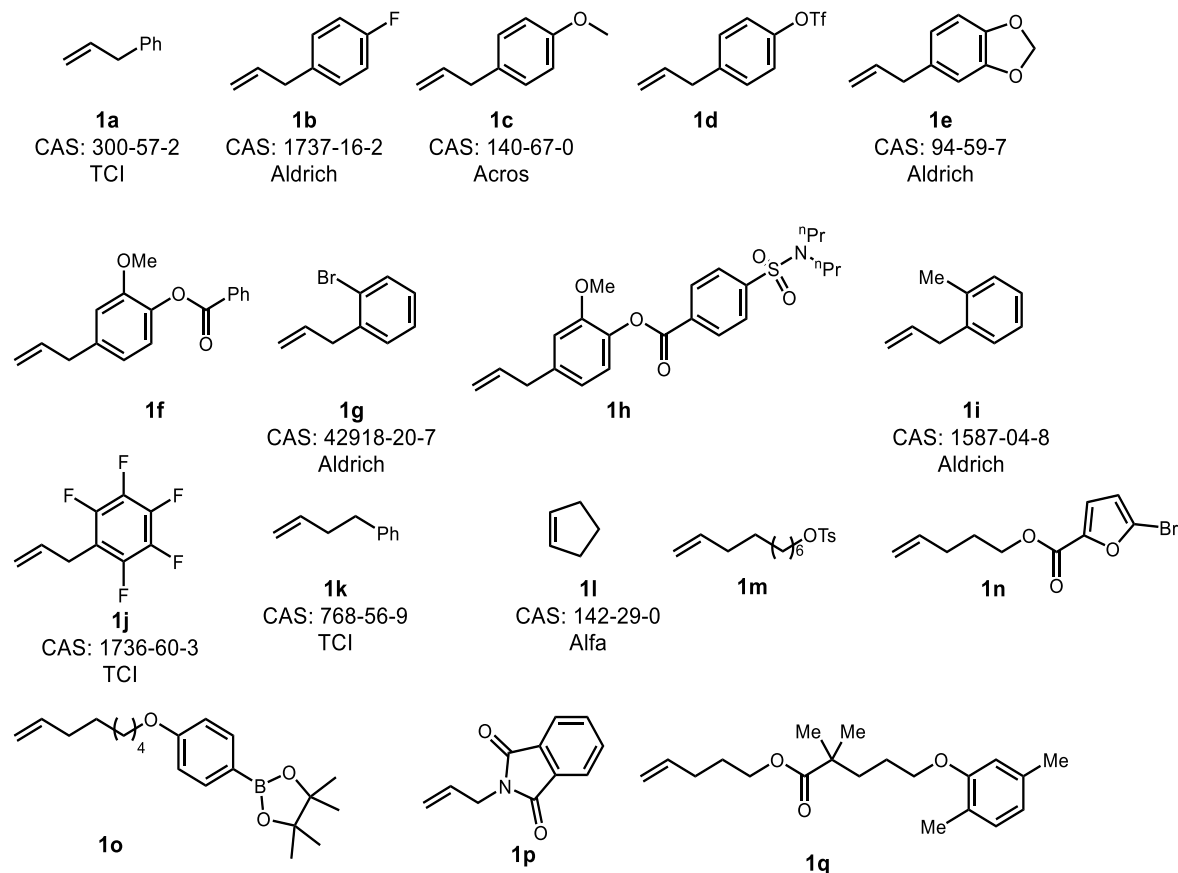

The alkenes **1a-1c**, **1e**, **1g**, and **1j-1l** are commercial, and were used directly without purification. The alkenes **1f** and **1m-1q**,<sup>10</sup> and **1d**<sup>11</sup> were synthesized according to a known literature procedure and have been previously characterized.

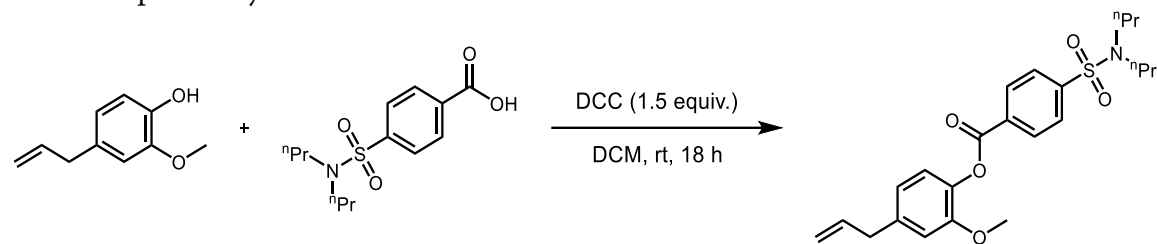

### 4-Allyl-2-methoxyphenyl 4-(N,N-dipropylsulfamoyl)benzoate (**1h**) (SGS-6-62)

DCC (928 mg, 4.5 mmol, 1.5 equiv) was added to the solution of probenecid (856 mg, 3.0 mmol, 1.0 equiv) and eugenol (0.558 ml, 3.6 mmol, 1.2 equiv) in 15 mL of  $\text{CH}_2\text{Cl}_2$ . The reaction mixture was stirred at room temperature overnight. The crude mixture filtered through celite and purified by flash chromatography (hexanes/ethyl acetate = 5:1) to obtain the pure compound as a white solid (342.8 mg, 26% yield).

<sup>1</sup>H NMR (400 MHz,  $\text{CDCl}_3$ )  $\delta$  8.32 (d,  $J$  = 8.5 Hz, 2H), 7.93 (d,  $J$  = 8.5 Hz, 2H), 7.07 (d,  $J$  = 7.9 Hz, 1H), 6.88 – 6.79 (m, 2H), 5.99 (ddt,  $J$  = 16.8, 10.1, 6.7 Hz, 1H), 5.20 – 5.07 (m, 2H), 3.81 (s, 3H), 3.42 (d,  $J$  = 6.7 Hz, 2H), 3.16 – 3.07 (m, 4H), 1.67 – 1.48 (m, 4H), 0.89 (t,  $J$  = 7.4 Hz, 6H).

<sup>13</sup>C NMR (101 MHz,  $\text{CDCl}_3$ )  $\delta$  163.7, 151.0, 144.8, 139.6, 138.0, 137.1, 133.0, 131.0, 127.3, 122.6, 120.9, 116.4, 113.0, 56.0, 50.2, 40.3, 22.1, 11.3.

**HRMS** (ESI) calcd for  $C_{23}H_{30}O_5NS$   $[M+H]^+$ : 432.18392, found: 432.18363.

**m.p.** = 105 – 106 °C

### 3. Synthetic applications of products

#### Synthesis of 3-(1-(4-Methoxyphenyl)allyl)-1-phenyl-1H-pyrrole (10) (SGS-6-94)

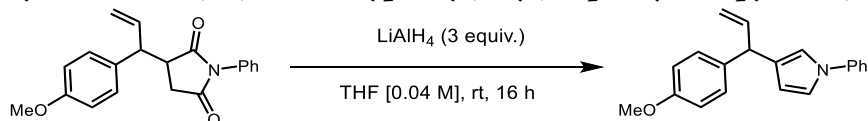

The following reaction was based on a literature procedure.<sup>12</sup> A reaction tube equipped with a magnetic stir bar was capped with a septum and flame dried under vacuum. **3fc** (32.3 mg, 0.1 mmol, 1.0 equiv), is dissolved in anhydrous THF (2.5 mL).  $LiAlH_4$  (10.7 mg, 0.3 mmol, 3 equiv) was added in one portion under nitrogen stream. The flask sealed and stirred at room temperature for 16 h. The reaction is quenched with water at 0 °C. The crude reaction mixture is extracted with ethyl acetate, dried over magnesium sulfate, filtered, and concentrated. The crude reaction mixture was immediately purified by flash chromatography (hexanes/ethyl acetate = 5:1) to give the pure product **10** as a yellow oil (24.6 mg, 85% yield).

**<sup>1</sup>H NMR** (500 MHz,  $CDCl_3$ )  $\delta$  7.42 – 7.33 (m, 4H), 7.25 – 7.18 (m, 3H), 7.05 (t,  $J$  = 2.6 Hz, 1H), 6.90 – 6.85 (m, 2H), 6.81 (s, 1H), 6.26 (ddd,  $J$  = 17.3, 10.0, 7.5 Hz, 1H), 6.15 (dd,  $J$  = 2.6, 1.9 Hz, 1H), 5.16 – 5.06 (m, 2H), 4.61 (d,  $J$  = 7.4 Hz, 1H), 3.81 (s, 3H).

**<sup>13</sup>C NMR** (126 MHz,  $CDCl_3$ )  $\delta$  158.2, 141.7, 140.8, 136.3, 129.6, 129.4, 128.9, 125.4, 120.2, 119.4, 117.3, 114.8, 113.9, 110.9, 55.4, 47.7.

**HRMS** (ESI) calcd for  $C_{20}H_{20}ON$   $[M+H]^+$ : 290.15394, found: 290.15333.

#### Synthesis of 3-(1-(4-Methoxyphenyl)allyl)-1-phenylpyrrolidine (11) (SGS-6-67)

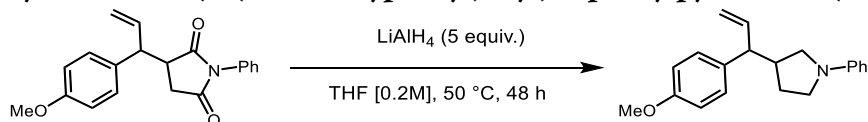

The following reaction was based on a literature procedure.<sup>13</sup> A reaction tube equipped with a magnetic stir bar was capped with a Teflon/silicone septum screw cap and flame dried under vacuum. **3fc** (64.3 mg, 0.2 mmol, 1.0 equiv), is dissolved in anhydrous THF (1.0 mL).  $LiAlH_4$  (2.7 mg, 0.012 mmol, 5 equiv) was added into the reaction tube in one portion. The reaction tube sealed and stirred at 50 °C, 48 h. The reaction is quenched with water at 0 °C. The crude reaction mixture is extracted with ethyl acetate, dried over magnesium sulfate, filtered, and concentrated. The crude reaction mixture was purified by flash chromatography (hexanes/ethyl acetate = 5:1) to give the pure product **11** as a clear oil (21.5 mg, 37% yield, 5.0:1 d.r.).

**<sup>1</sup>H NMR** (601 MHz,  $CDCl_3$ )  $\delta$  7.24 – 7.19 (m, 2H<sup>\*</sup>), 7.18 – 7.14 (m, 2H<sup>'</sup>), 7.14 – 7.10 (m, 2H<sup>\*</sup>+2H<sup>'</sup>), 6.89 – 6.83 (m, 2H<sup>\*</sup>+2H<sup>'</sup>), 6.65 (t,  $J$  = 7.3 Hz, 1H<sup>\*</sup>), 6.61 (t,  $J$  = 7.3 Hz, 1H<sup>'</sup>), 6.55 (d,  $J$  = 8.0 Hz, 2H<sup>\*</sup>), 6.44 (d,  $J$  = 8.0 Hz, 2H<sup>'</sup>), 6.04 – 5.94 (m, 1H<sup>\*</sup>+1H<sup>'</sup>), 5.11 – 4.99 (m, 2H<sup>\*</sup>+2H<sup>'</sup>), 3.79 (s, 3H<sup>'</sup>), 3.79 (s, 3H<sup>\*</sup>), 3.46 (dd,  $J$  = 9.1, 7.6 Hz, 1H<sup>\*</sup>), 3.39 (td,  $J$  = 8.8, 2.8 Hz, 1H<sup>'</sup>), 3.35 – 3.27 (m, 1H<sup>\*</sup>+1H<sup>'</sup>), 3.23 – 3.17 (m, 1H<sup>\*</sup>), 3.14 – 3.04 (m, 2H<sup>\*</sup>+2H<sup>'</sup>), 2.83 (t,  $J$  = 8.8 Hz, 1H<sup>'</sup>), 2.68 – 2.56 (m, 1H<sup>\*</sup>+1H<sup>'</sup>), 2.21 (dtd,  $J$  = 9.4, 6.7, 2.7 Hz, 1H<sup>'</sup>), 1.86 – 1.73 (m, 1H<sup>\*</sup>+1H<sup>'</sup>), 1.57 (dq,  $J$  = 12.4, 8.8 Hz, 1H<sup>\*</sup>+1H<sup>'</sup>).

<sup>13</sup>C NMR (151 MHz, CDCl<sub>3</sub>) δ 158.3, 158.3, 148.0, 147.9, 141.2<sub>2</sub>, 141.1<sub>7</sub>, 135.5, 135.4, 129.3, 129.2, 128.7, 128.6, 115.6<sub>1</sub>, 115.5<sub>7</sub>, 114.9, 114.8, 114.1<sub>9</sub>, 114.1<sub>6</sub>, 111.6<sub>1</sub>, 111.5<sub>7</sub>, 55.4, 54.1<sub>7</sub>, 54.1<sub>5</sub>, 52.5, 52.4, 47.7, 47.5, 43.6, 43.5, 30.8, 30.5. One peak missing due to overlap.

HRMS (ESI) calcd for C<sub>20</sub>H<sub>24</sub>ON [M+H]<sup>+</sup>: 294.18524, found: 294.18549.

### Synthesis of 3,4-Diphenylhex-5-enoic acid (12) (SGS-6-83)

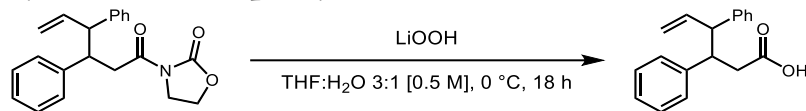

The following reaction was based on a literature procedure.<sup>14</sup> *N*-Acyl oxazolidinone **5aa** (67.1 mg, 0.2 mmol, 1.0 equiv), is dissolved in THF:H<sub>2</sub>O 3:1 (0.4 mL) in a 5 mL round bottomed flask and cooled to 0 °C. 30% H<sub>2</sub>O<sub>2</sub> (0.16 mL, 8.0 equiv) and LiOH (16.8 mg, 2.0 equiv) are sequentially added and the reaction vessel is allowed to warm to room temperature and stirred for 18 h. The peroxide is quenched by the addition of saturated aqueous Na<sub>2</sub>SO<sub>3</sub>, and the mixture is acidified to pH 1-2 with 6 M HCl. The crude reaction mixture is extracted with ethyl acetate, dried over magnesium sulfate, filtered, and concentrated. The crude reaction mixture was purified by flash chromatography (hexanes/ethyl acetate = 3:1) to give the pure product **12** as a clear oil (51.3 mg, 96% yield, 1:2.2 d.r.)

<sup>1</sup>H NMR (500 MHz, CDCl<sub>3</sub>) δ 7.33 – 7.24 (m, 3H\*+3H'), 7.24 – 7.07 (m, 6H\*+5H'), 7.05 (t, *J* = 6.8 Hz, 2H'), 6.99 – 6.93 (m, 1H\*), 6.09 – 6.00 (m, 1H'), 5.84 – 5.74 (m, 1H\*), 5.21 – 5.06 (m, 2H'), 4.91 – 4.70 (m, 2H\*), 3.53 – 3.38 (m, 2H\*+2H'), 2.98 – 2.92 (m, 1H'), 2.67 – 2.59 (m, 1H'), 2.58 – 2.46 (m, 2H\*). Carboxylic acid proton was not observed.

<sup>13</sup>C NMR (126 MHz, CDCl<sub>3</sub>) δ 177.5, 177.2, 142.3, 142.1, 141.5, 140.0, 139.3, 128.8, 128.6, 128.4, 128.3, 128.1, 128.1, 126.9, 126.6, 126.3, 116.8, 116.5, 57.2, 55.8, 47.2, 46.7, 39.1<sub>4</sub>, 39.1<sub>0</sub>.

HRMS (ESI) calcd for C<sub>18</sub>H<sub>17</sub>O<sub>2</sub> [M-H]<sup>-</sup>: 265.12231, found: 265.12271.

### Synthesis of Prop-2-yn-1-yl 4-(2-bromophenyl)-3-(4-chlorophenyl)hex-5-enoate (13) (SGS-7-4)

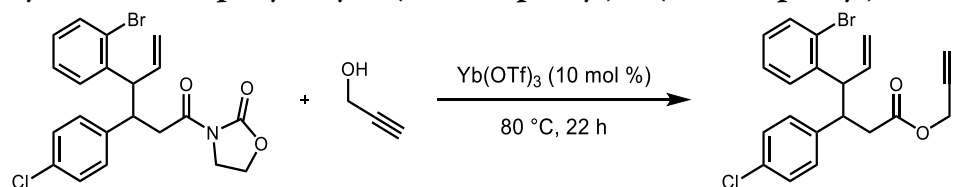

The following reaction was based on a literature procedure.<sup>15</sup> A reaction tube equipped with a magnetic stir bar was capped with a Teflon/silicone septum screw cap was flame dried under vacuum. Yb(OTf)<sub>3</sub> (6.2 mg, 10 mol %) was added and the reaction tube was purged with nitrogen. Propargyl alcohol (680 μL) was added to the reaction tube and the catalyst solution was heated to 60 °C for 30 minutes. The reaction vial was removed from the heat for 5 minutes and **5bg** (44.8 mg, 0.100 mmol) dissolved in propargyl alcohol (680 μL) was added. The reaction vial was stirred at 80 °C for 22 hours. The reaction mixture was then cooled, filtered through a silica plug, and the crude reaction mixture was purified by flash chromatography (hexanes/ethyl acetate = 3:1) to give the pure product **13** as a clear oil (37.6 mg, 90% yield, 1:2.5 d.r.).

<sup>1</sup>H NMR (500 MHz, CDCl<sub>3</sub>) δ 7.60 (dd, *J* = 8.0, 1.0 Hz, 1H\*), 7.37 (dd, *J* = 8.0, 0.9 Hz, 1H'), 7.31 – 7.02 (m, 7H\*+6H'), 6.94 – 6.90 (m, 1H'), 5.90 (dt, *J* = 17.0, 9.7 Hz, 1H'), 5.72 (ddd, *J* = 17.1, 10.2, 8.3 Hz, 1H\*), 5.33 – 5.11 (m, 2H'), 4.89 (dd, *J* = 37.5, 13.6 Hz, 2H\*), 4.59 – 4.34 (m, 2H\*+2H'), 4.17 (t, *J* = 9.3 Hz, 1H\*+1H'), 3.61 (dt, *J* = 10.3, 5.1 Hz, 1H'), 3.50 (td, *J* = 10.4, 4.6 Hz, 1H\*), 3.01 (dd, *J* = 15.9, 4.7



Hz, 1H'), 2.68 – 2.60 (m, 1H\*+1H'), 2.50 (dd,  $J = 15.8, 4.7$  Hz, 1H\*), 2.40 (t,  $J = 2.4$  Hz, 1H'), 2.37 (t,  $J = 2.4$  Hz, 1H\*).

$^{13}\text{C NMR}$  (126 MHz,  $\text{CDCl}_3$ )  $\delta$  171.3, 171.1, 141.2, 140.9, 139.8, 139.7, 138.5, 137.7, 133.4, 133.2, 132.8, 132.4, 130.0, 129.6, 129.1, 128.9, 128.7, 128.4, 128.4, 128.0, 127.9, 127.6, 125.4, 118.0, 117.7, 77.5<sub>4</sub>, 77.4<sub>3</sub>, 74.9<sub>6</sub>, 74.9<sub>2</sub>, 54.0, 53.2, 52.1, 52.0, 46.6, 45.4, 39.6, 38.9.

**HRMS** (ESI) calcd for  $\text{C}_{21}\text{H}_{19}\text{O}_2\text{BrCl}$   $[\text{M}+\text{H}]^+$ : 417.02515, found: 417.02509.

### Synthesis of 2-(2,5-Diphenylhepta-1,6-dien-4-yl)isoindoline-1,3-dione (**S1**) (SGS-6-79)

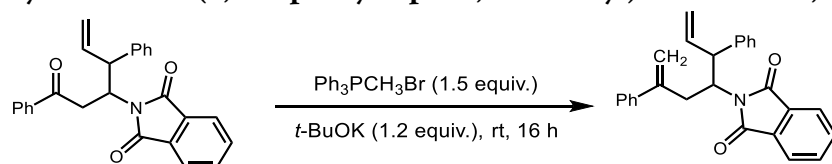

The following reaction was based on a literature procedure.<sup>16</sup> A flame dried round bottom flask with stir bar was transferred into the glove box. Methyltriphenylphosphonium bromide (160.8 mg, 0.45 mmol, 1.5 equiv) and potassium tert-butoxide (50.5 mg, 0.45 mmol, 1.5 equiv) are transferred into the flask and subsequently dissolved in anhydrous THF (1.0 mL) at room temperature. The resulting yellow solution was stirred at rt for 1 hr. **7aa** (118.6 mg, 0.3 mmol, 1.0 equiv) is added to the reaction mixture. The flask was sealed, removed from the glove box, and stirred at rt for 16 hours. The reaction is quenched by the addition of water and ethyl acetate. The crude reaction mixture is extracted with ethyl acetate. The combined organic layers were washed with water and brine, dried over  $\text{MgSO}_4$ , and evaporated under reduced pressure. The crude product was purified by flash chromatography (hexanes/ethyl ether = 100:1) to give the pure product **S1** as a clear oil (55.0 mg, 47% yield, 2.2:1 d.r.).

$^1\text{H NMR}$  (500 MHz,  $\text{CDCl}_3$ )  $\delta$  7.79 – 7.46 (m, 4H\*+4H'), 7.40 (t,  $J = 7.4$  Hz, 2H\*), 7.35 (d,  $J = 7.0$  Hz, 2H\*), 7.31 (t,  $J = 7.2$  Hz, 1H\*), 7.25 – 6.94 (m, 5H\*+10H'), 6.04 (dt,  $J = 17.0, 9.7$  Hz, 1H'), 5.82 (dt,  $J = 16.9, 9.8$  Hz, 1H\*), 5.39 – 4.76 (m, 4H\*+4H'), 4.57 (td,  $J = 11.6, 3.0$  Hz, 1H\*+1H'), 4.26 – 4.20 (m, 1H'), 4.19 – 4.12 (m, 1H\*), 3.40 – 3.19 (m, 1H\*+2H'), 2.63 (dd,  $J = 14.6, 2.0$  Hz, 1H\*).

$^{13}\text{C NMR}$  (126 MHz,  $\text{CDCl}_3$ )  $\delta$  146.3, 146.0, 141.5, 141.1, 140.7, 140.2, 139.6, 139.0, 133.8, 133.5, 129.2, 128.5, 128.4, 128.3, 128.1, 127.6, 127.5<sub>3</sub>, 127.5<sub>1</sub>, 127.3, 126.8, 126.4, 126.3, 123.4, 122.9, 117.6, 116.7, 115.6, 115.2, 55.1, 54.4, 53.6, 53.5, 36.2, 35.3. Two peaks missing due to overlap. The broad phthalimide carbonyl peaks were not resolved from baseline.

**HRMS** (ESI) calcd for  $\text{C}_{27}\text{H}_{24}\text{O}_2\text{N}$   $[\text{M}+\text{H}]^+$ : 394.18016, found: 394.18021.

### Synthesis of 2-(2,4-Diphenylcyclopent-3-en-1-yl)isoindoline-1,3-dione (**14**) (SGS-6-80)

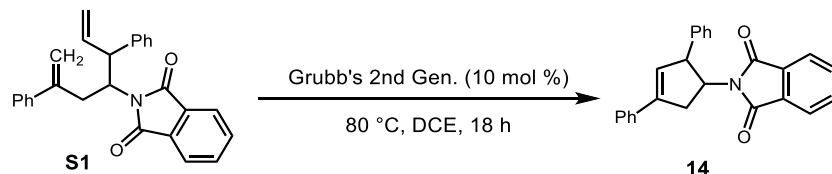

The following reaction was based on a literature procedure.<sup>17</sup> A reaction tube equipped with a magnetic stir bar was capped with a Teflon/silicone septum screw cap and flame dried under vacuum. **S1** (39.3 mg, 0.1 mmol, 1.0 equiv), Grubb's second generation catalyst (8.5 mg, 0.01 mmol, 10% mol), and anhydrous DCE (5 mL) were added into the reaction tube in the glovebox. The reaction tube was sealed, removed from the glove box, and was stirred for 18 h at 80 °C. The reaction mixture was cooled to room

temperature and filtered through a plug of silica gel and washed with CH<sub>2</sub>Cl<sub>2</sub> (ca. 30 mL). The crude product was purified by flash chromatography (hexanes/ethyl ether = 20:1) to give the pure product **14** as a yellow oil (12.0 mg, 33% yield, 1:1.6 dr).

**<sup>1</sup>H NMR** (500 MHz, CDCl<sub>3</sub>) δ 7.85 – 7.80 (m, 2H\*), 7.74 – 7.69 (m, 2H\*), 7.62 – 7.55 (m, 1H\*), 7.48 (d, *J* = 7.7 Hz, 2H\*), 7.42 – 7.19 (m, 7H\*+9H'), 7.12 (d, *J* = 7.7 Hz, 2H'), 7.05 (t, *J* = 7.5 Hz, 2H'), 6.98 (t, *J* = 7.3 Hz, 1H'),

6.36 (d, *J* = 2.0 Hz, 1H'), 6.27 (s, 1H\*), 5.40 (td, *J* = 9.1, 6.2 Hz, 1H'), 4.96 (q, *J* = 8.8 Hz, 1H\*), 4.82 – 4.77 (m, 1H\*), 4.50 (d, *J* = 8.8 Hz, 1H'), 3.97 (ddt, *J* = 16.1, 6.1, 1.9 Hz, 1H'), 3.46 – 3.38 (m, 1H\*), 3.17 – 3.07 (m, 1H\*+1H').

**<sup>13</sup>C NMR** (126 MHz, CDCl<sub>3</sub>) δ 168.5, 168.4, 142.8, 141.3, 135.8, 134.1, 133.7, 132.1, 128.9, 128.9, 128.7, 128.6, 128.0, 127.8<sub>7</sub>, 127.8<sub>0</sub>, 127.6, 127.2, 127.0, 126.0, 125.8, 123.4, 122.8, 58.4, 55.1, 54.2, 54.1, 36.8, 34.7.

**HRMS** (ESI) calcd for C<sub>25</sub>H<sub>20</sub>O<sub>2</sub>N [M+H]<sup>+</sup>: 366.14886, found: 366.14940.

## 4. Assignment of diastereomers

### 4.1 Assignment for succinimide products **3** by X-ray crystallography

A sample **3fc** was crystallized from previously isolated material using slow evaporation out of dichloromethane and hexanes to achieve crystals with further diastereomeric enrichment.

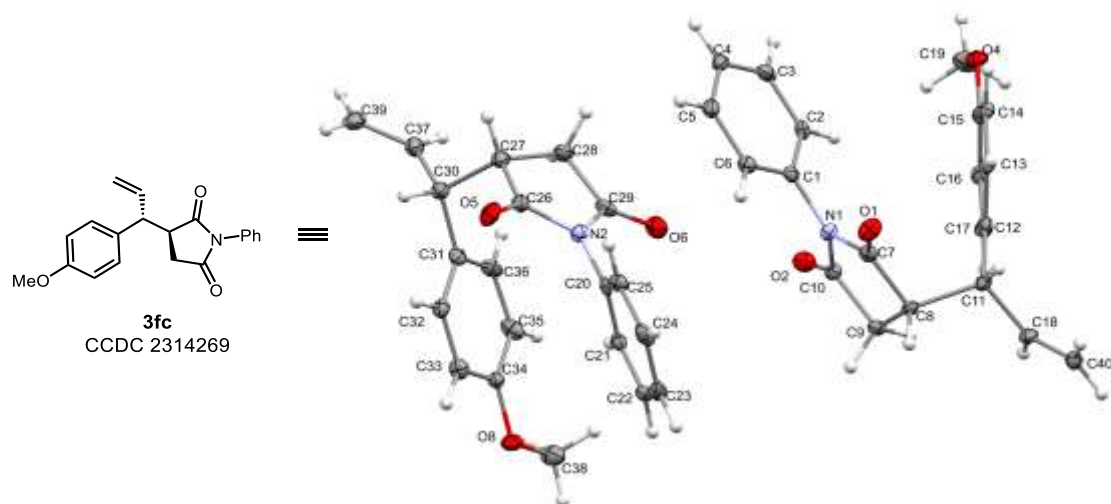

**Figure S1:** Structure of diastereomerically enriched **3fc**. Ellipsoid contour probability is set at 50%

The observed relative configuration of the major product is consistent with a Mukaiyama-type open transition state, in which additive coordinated to the  $\gamma$  carbon of the Michael acceptor is close enough to the incoming allyliron to have an effect on the diastereoselectivity of the allylation product.

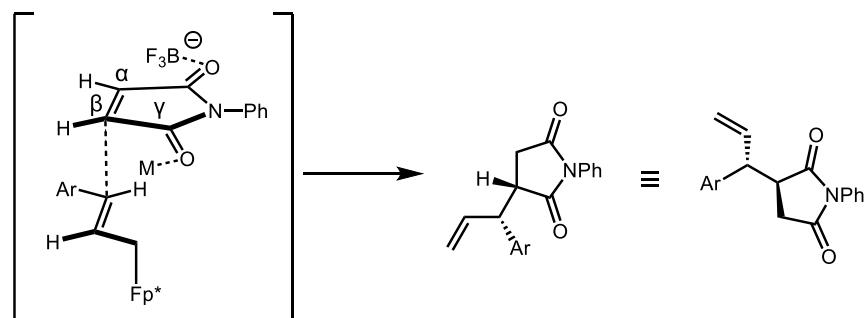

**Figure S2:** Postulated open transition state and anticipated stereochemical outcome



#### 4.2 Assignment for $\beta$ -aminoketones products **7** and **9** by nOe experiments and multiplet analysis

Comparison of coupling constants and nuclear Overhauser effect experiments were conducted on the cyclic derivative **14** and the *anti*-diastereomer was determined to be the major product.

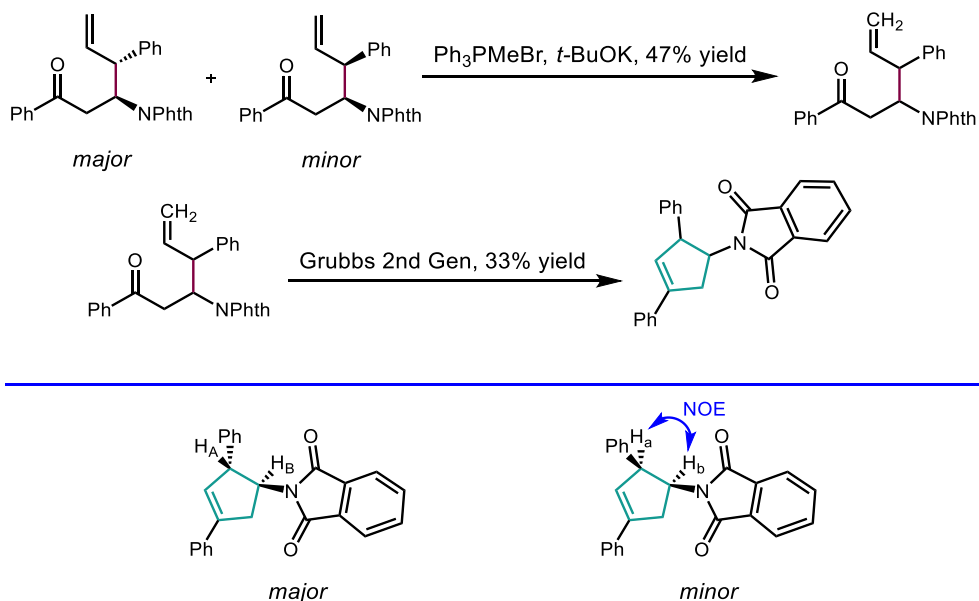

**Figure S3:** Derivatization reactions and observed stereochemical outcomes

The major product of the Wittig reaction was identified as the major product of the iron-catalyzed reaction based on comparison of coupling constants for the alkene protons at 6.07 (minor) and 5.92 (major), which remain at (dt,  $J = 16.9, 9.8$  Hz) and (dt,  $J = 16.9, 9.9$  Hz), respectively. The major product of olefin metathesis was identified as the major product of the Wittig reaction by integration comparison.

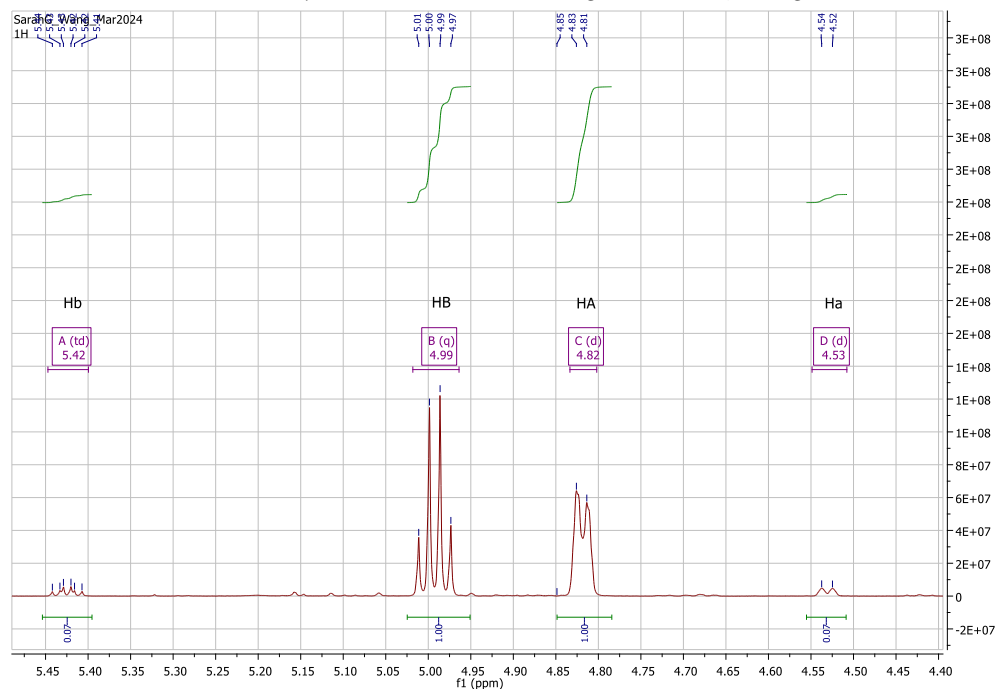

**Figure S4:**  $^1\text{H}$  NMR of **14** showing protons  $\text{H}_a$ ,  $\text{H}_b$ ,  $\text{H}_A$ , and  $\text{H}_B$

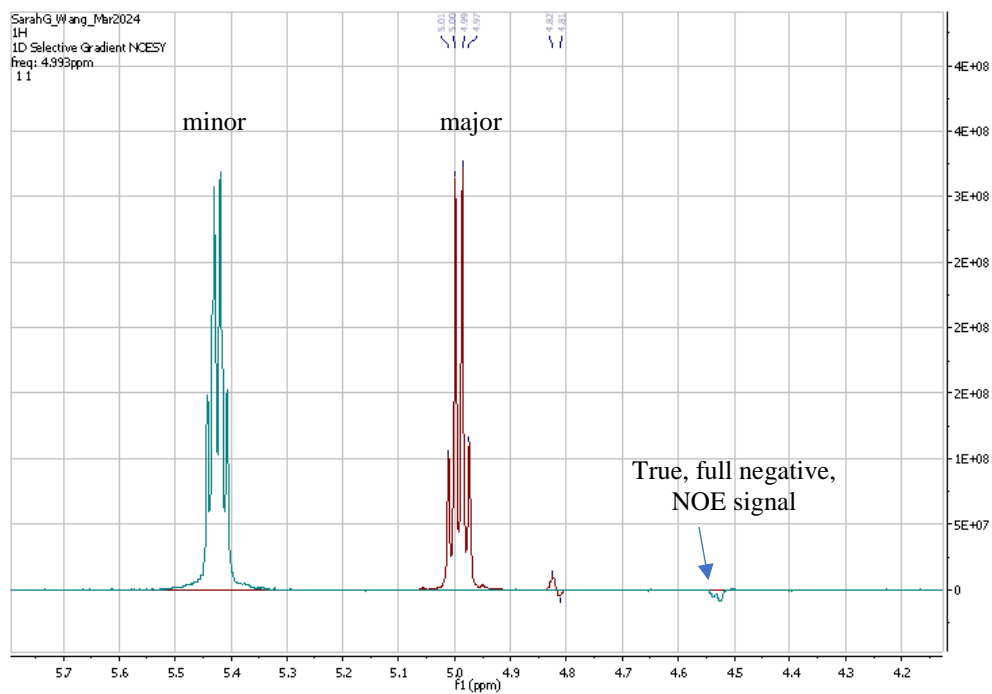

**Figure S5:** NOE irradiation at protons  $\text{H}_b$ , and  $\text{H}_B$  overlapped spectra

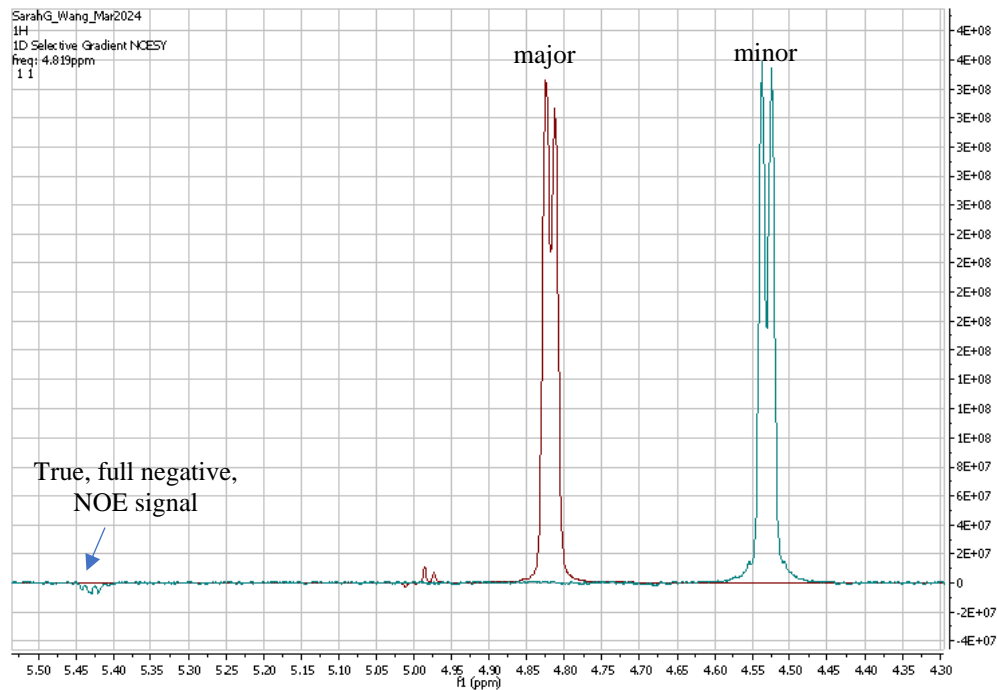

**Figure S6:** NOE irradiation at protons  $\text{H}_a$  and  $\text{H}_A$  overlapped spectra

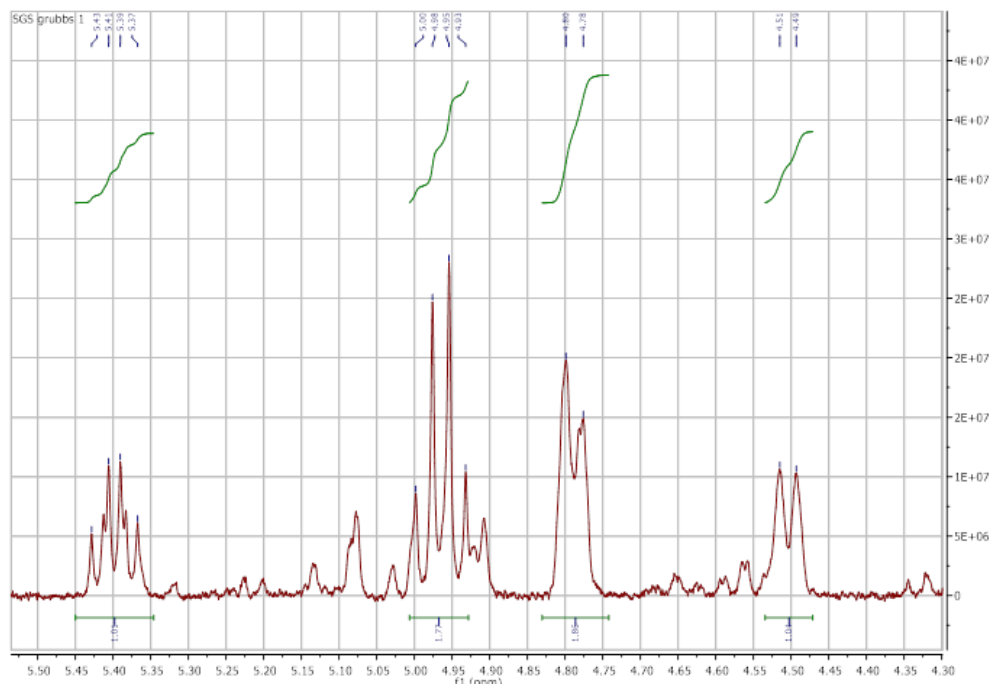

**Figure S7:** Crude NMR spectrum of transformation showing original diastereomeric ratio before enrichment on silica. The diastereomeric ratio is consistent with the crude spectra of the Michael addition.

Comparison of *syn*- and *anti*-configurations by DFT optimized geometry shows dihedral angles of which are consistent with a quartet splitting pattern for the *anti*-isomer, and a triplet of doublets for the *syn*-isomer.

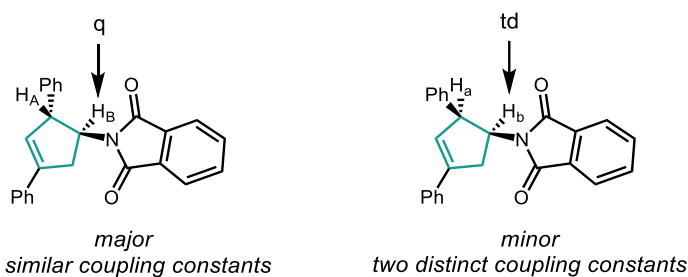

| Entry       | Chemical Shift (experimental) | Coupling Constants (experimental) | Dihedral Angles (DFT) | Coupling Constants (Karplus curve prediction based on cyclopentane) |
|-------------|-------------------------------|-----------------------------------|-----------------------|---------------------------------------------------------------------|
| <i>syn</i>  | 5.45                          | 9.1, 9.1, 6.2                     | 13.5, 6.4, 112.4      | 11, 11, 4                                                           |
| <i>anti</i> | 4.99                          | 8.9, 8.9, 8.9                     | 152.6, 155.2, 32.4    | 10.5, 10.5, 9                                                       |

Karplus curve predictions were based on cyclopentane Karplus curve data from professor Hans J. Reich's NMR spectroscopy collection: <https://organicchemistrydata.org/hansreich/resources/nmr/?page=05-hmr-05-3j%2F#05-hmr-05-3j-cyclopentane> Accessed 4/12/2024

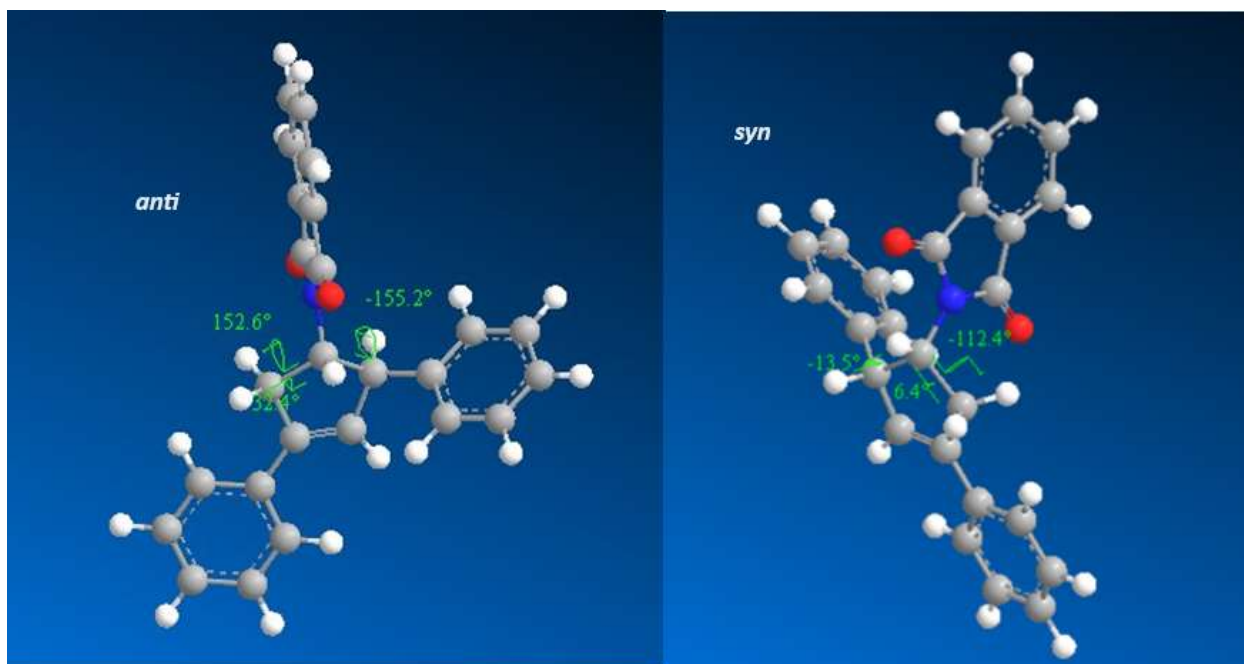

**Figure S8:** Comparison of dihedral angles for *syn*- and *anti*-configurations by DFT (B3LYP/6-31G) optimized geometry

#### 4.3 Assignment for oxazolidinone products **5** by chemical correlation with known diol

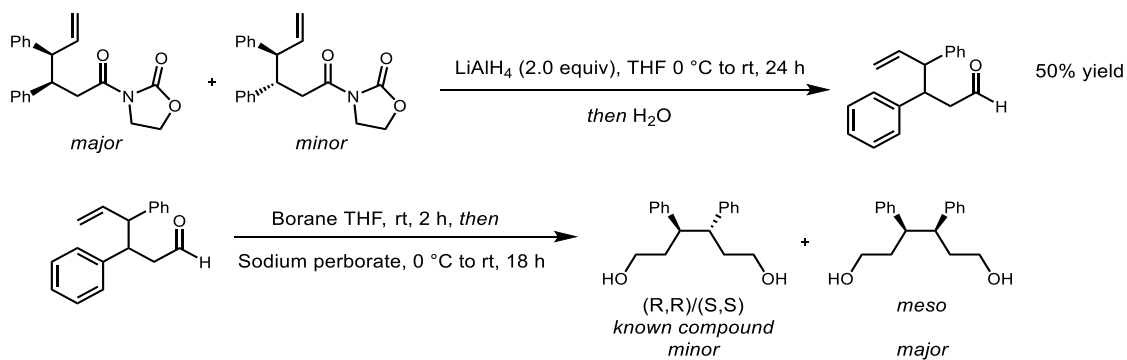

A sample of **5aa** was reduced to the aldehyde with LAH and subsequently transformed into diol with Borane THF to give a diastereomeric mixture of 3,4-diphenylhexane-1,6-diol.

This was compared to published values in N. Kise, K. Iwasaki, N. Tokieda, and N. Ueda, *Org. Lett.*, 2001, **3**, 3241-3244.

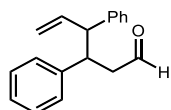

#### 3,4-diphenylhex-5-enal (**S2**): (SGS-7-22)

**5aa** (0.19mmol, 1.0 equiv, 2.1:1 dr) is placed in a flame dried round bottom flask under nitrogen and dissolved in dry THF (0.2 M). Lithium aluminum hydride (14.4 mg, 2.0 equiv) is added at 0 °C and the reaction mixture is allowed to warm to room temperature and is stirred for 24 h or until consumption of



the starting material. The reaction mixture is then cooled to 0 °C and treated with water, extracted with ethyl acetate, dried over magnesium sulfate, filtered, and concentrated *in vacuo*. <sup>1</sup>H NMR analysis of the crude mixture showed 1:2.2 dr. Purification by preparatory TLC in 2:1 hexanes:ethyl acetate gave pure 3,4-diphenylhex-5-enal as a white solid (25.0 mg, 50% yield, 2.2:1 dr).

<sup>1</sup>H NMR (400 MHz, CDCl<sub>3</sub>) δ 9.65 – 9.61 (m, 1H'), 9.45 – 9.42 (m, 1H\*), 7.36 – 7.10 (m, 8H\*+8H'), 7.09 – 7.03 (m, 2H'), 7.02 – 6.95 (m, 2H\*), 6.04 (dt, *J* = 16.9, 9.8 Hz, 1H'), 5.90 – 5.74 (m, 1H\*), 5.17 (dd, *J* = 16.9, 0.8 Hz, 1H'), 5.12 (dd, *J* = 10.1, 1.5 Hz, 1H'), 4.89 (d, *J* = 1.0 Hz, 1H\*), 4.87 (d, *J* = 0.7 Hz, 1H\*), 4.76 (dd, *J* = 9.6, 8.5 Hz, 1H), 3.64 – 3.42 (m, 2H\*+2H'), 3.00 (ddd, *J* = 17.1, 5.0, 1.4 Hz, 1H'), 2.79 (ddd, *J* = 17.1, 9.2, 2.2 Hz, 1H'), 2.68 (ddd, *J* = 17.0, 9.1, 2.3 Hz, 1H\*), 2.56 (ddd, *J* = 17.1, 4.6, 1.4 Hz, 1H\*).

<sup>13</sup>C NMR (101 MHz, CDCl<sub>3</sub>) δ 201.8, 201.5, 142.2, 142.0, 141.8, 141.7, 140.2, 139.2, 128.9, 128.6, 128.4, 128.3, 128.1, 127.0<sub>4</sub>, 126.9<sub>9</sub>, 126.6, 126.4, 116.8, 116.6, 57.5, 56.0, 48.6, 48.5, 45.7, 45.2. Three peaks missing due to overlap.

HRMS (ESI) calcd for C<sub>18</sub>H<sub>19</sub>O [M+H]<sup>+</sup>: 251.14304, found: 251.14280.

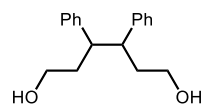

**3,4-diphenylhexane-1,6-diol:** (SGS-7-34)

3,4-diphenylhex-5-enal (0.07mmol, 1.0 equiv, 2.2:1 dr) is placed in a flame dried round bottom flask under nitrogen. Borane THF (0.2 mL, 3.0 equiv, 1 M in THF) is added to the neat material at room temperature. The reaction mixture is stirred for 2 h, then cooled to 0 °C and treated with water (0.14 mL, 2 mL/mmol) followed by sodium perborate (34.9 mg, 5 equiv). The reaction mixture is allowed to gradually return to room temperature over 18 h. The crude reaction mixture is then extracted with ethyl acetate, dried over magnesium sulfate, filtered, and concentrated *in vacuo*. <sup>1</sup>H NMR analysis of the crude mixture showed 1:2.7 dr. Purification by preparatory TLC in 3:1 hexanes:ethyl acetate gave pure 3,4-diphenylhexane-1,6-diol as a white solid with diastereomers separated.

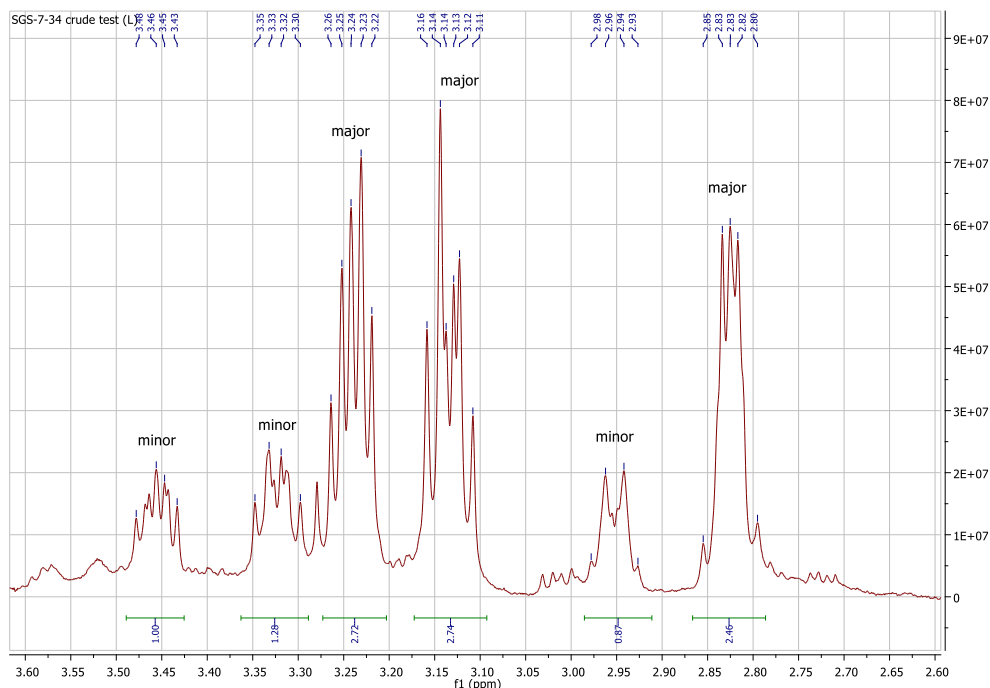

**Figure S9:** Crude NMR spectrum of transformation showing diastereomeric ratio before separation of diastereomers. The diastereomeric ratio is consistent with the crude spectra of the Michael addition.

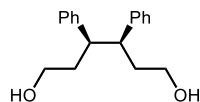

**meso-3,4-diphenylhexane-1,6-diol (S3):** (SGS-7-34-P3)

$^1\text{H NMR}$  (600 MHz,  $\text{CDCl}_3$ )  $\delta$  7.37 (t,  $J = 7.6$  Hz, 4H), 7.28 – 7.26 (m, 6H), 3.36 – 3.30 (m, 2H), 3.23 (dt,  $J = 10.5, 7.4$  Hz, 2H), 2.95 – 2.88 (m, 2H), 1.68 – 1.62 (m, 4H), 1.59 (s broad, 2H).

$^{13}\text{C NMR}$  (101 MHz,  $\text{CDCl}_3$ )  $\delta$  143.6, 128.9, 128.4, 126.8, 61.3, 49.0, 37.6.

**HRMS** (ESI) calcd for  $\text{C}_{18}\text{H}_{23}\text{O}_2$   $[\text{M}+\text{H}]^+$ : 271.16926, found: 271.16881.

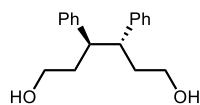

**(3R,4R)-3,4-diphenylhexane-1,6-diol and (3S,4S)-3,4-diphenylhexane-1,6-diol (S4):** (SGS-7-34-P4)

$^1\text{H NMR}$  (600 MHz,  $\text{CDCl}_3$ )  $\delta$  7.17 – 7.08 (m, 6H), 6.90 (d,  $J = 6.9$  Hz, 4H), 3.53 (ddd,  $J = 10.8, 7.1, 4.8$  Hz, 1H), 3.40 (ddd,  $J = 10.6, 7.9, 6.5$  Hz, 1H), 3.07 – 2.98 (m, 2H),  $\delta$  2.18 (dtd,  $J = 10.8, 7.8, 3.6$  Hz, 1H), 1.92 – 1.81 (m, 2H), 1.55 (s broad, 2H).

$^{13}\text{C NMR}$  (151 MHz,  $\text{CDCl}_3$ )  $\delta$  142.0, 129.0, 128.0, 126.4, 61.4, 48.1, 36.1.

**HRMS** (ESI) calcd for  $\text{C}_{18}\text{H}_{23}\text{O}_2$   $[\text{M}+\text{H}]^+$ : 271.16926, found: 271.16897.

This spectra data matches literature the values (N. Kise, K. Iwasaki, N. Tokieda, and N. Ueda, *Org. Lett.*, 2001, 3, 3241-3244).  $^1\text{H NMR}$  (270 MHz,  $\text{CDCl}_3$ )  $\delta$  7.05-7.17 (m, 6H), 6.87-6.92 (m, 4H), 3.48-3.59 (m, 2H), 3.34-3.46 (m, 2H), 2.98-3.07 (m, 2H), 2.12-2.24 (m, 2H), 1.80-1.93 (m, 2H), 1.43 (brs, 2H).  $^{13}\text{C NMR}$  ( $\text{CDCl}_3$ )  $\delta$  147.76, 128.75, 127.58, 125.94, 60.86, 47.63, 35.94.

## 5. Reaction optimization

### 5.1 Optimization of Maleimide Michael Acceptors

**Table S1. Reaction discovery and Lewis acid investigation**

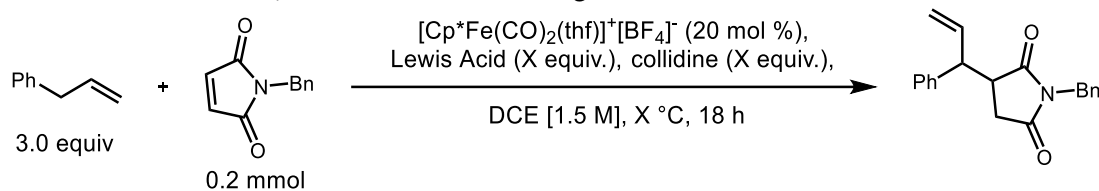

| Entry       | Lewis Acid                         | Lewis Acid Equiv | Base Equiv | Time (hr) | Temp. (°C) | NMR Maleimide (%) | NMR Yield (%) <sup>a</sup> |
|-------------|------------------------------------|------------------|------------|-----------|------------|-------------------|----------------------------|
| SGS-5-94-1  | TIPSOTf                            | 1.5              | 2.5        | 18        | 80         | 0                 | <10                        |
| SGS-5-94-2  | TIPSOTf                            | 2.2              | 2.5        | 18        | 60         | 0                 | <10                        |
| SGS-5-136   | TMSTOf                             | 2.5              | 3          | 18        | 60         | 0                 | 0                          |
| SGS-5-101-1 | BF <sub>3</sub> •Et <sub>2</sub> O | 2                | 3          | 4         | 80         | 24                | 28                         |
| SGS-5-101-2 | BF <sub>3</sub> •Et <sub>2</sub> O | 2                | 3          | 4         | 50         | 57                | 27                         |
| SGS-5-137-1 | BF <sub>3</sub> •Et <sub>2</sub> O | 3                | 4          | 18        | 60         | 0                 | 29                         |
| SGS-5-137-2 | BF <sub>3</sub> •Et <sub>2</sub> O | 6                | 4          | 18        | 60         | 0                 | <10                        |
| SGS-5-141   | BF <sub>3</sub> •Et <sub>2</sub> O | 3                | 4          | 3         | 60         | 15                | 30                         |

<sup>a</sup>Yields determined by <sup>1</sup>H NMR using 2,4-dinitrotoluene as the internal standard. Collidine = 2,4,6-trimethyl pyridine.

**Table S2: Exploration to find significant parameters**

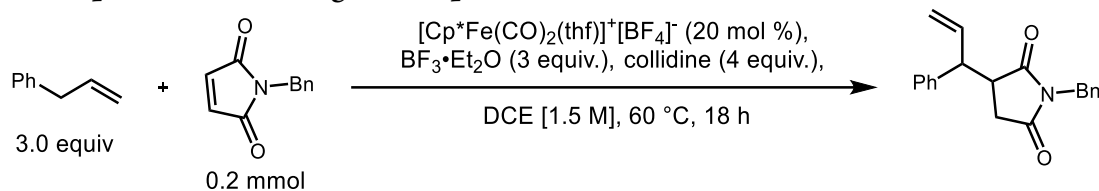

| Entry       | Variation from Standard Conditions | NMR Maleimide SM (%) | NMR Yield (%) <sup>a</sup> |
|-------------|------------------------------------|----------------------|----------------------------|
| SGS-5-142-1 | 100 °C                             | 0                    | 19                         |
| SGS-5-142-2 | 0.5 M DCE                          | 12                   | 15                         |
| SGS-5-142-3 | 0.35 equiv LiNTf <sub>2</sub>      | 0                    | 37                         |
| SGS-5-142-4 | 0.6 equiv LiNTf <sub>2</sub>       | 0                    | 32                         |

|             |                              |       |    |
|-------------|------------------------------|-------|----|
| SGS-5-142-5 | 1.0 equiv LiNTf <sub>2</sub> | 0     | 38 |
| SGS-5-142-6 | 0.1 equiv LiNTf <sub>2</sub> | trace | 23 |

<sup>a</sup>Yields determined by <sup>1</sup>H NMR using 2,4-dinitrotoluene as the internal standard. Collidine = 2,4,6-trimethyl pyridine.

**Table S3: Base optimization**

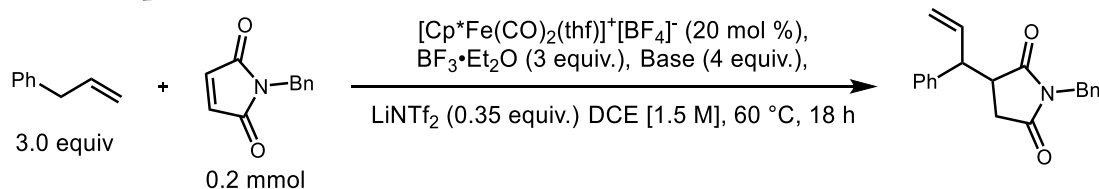

| Entry       | Base                        | NMR Maleimide SM (%) | NMR Yield (%) <sup>a</sup> |
|-------------|-----------------------------|----------------------|----------------------------|
| SGS-5-143-1 | TMPH                        | 0                    | 0                          |
| SGS-5-143-2 | 4-Cl-Lutidine               | 0                    | 47                         |
| SGS-5-143-3 | Lutidine                    | 0                    | 40                         |
| SGS-5-143-4 | 4-Br-Lutidine               | 0                    | 44                         |
| SGS-7-15    | 2,3,5,6-Tetramethylpyrazine | 0                    | 16 (5.2:1 dr)              |

<sup>a</sup>Yields determined by <sup>1</sup>H NMR using 2,4-dinitrotoluene as the internal standard. TMPH = 2,2,6,6-tetramethylpiperidine.

**Table S4: Temperature optimization**

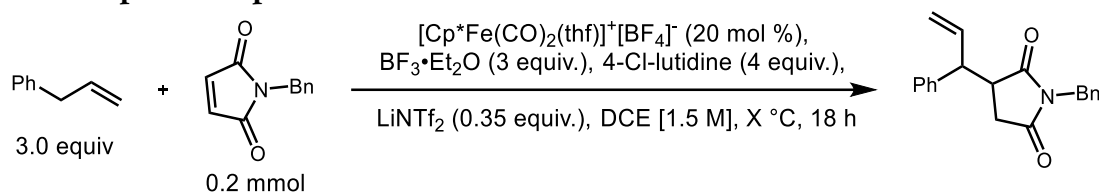

| Entry       | Temperature (°C) | NMR Maleimide SM (%) | NMR Yield (%) <sup>a</sup> |
|-------------|------------------|----------------------|----------------------------|
| SGS-5-143-2 | 60               | 0                    | 47                         |
| SGS-5-159   | 50               | 0                    | 54                         |
| SGS-5-147-1 | 40               | 0                    | 64                         |
| SGS-5-148-1 | 30               | 30                   | 37                         |
| SGS-5-148-2 | RT               | 24                   | 23                         |

<sup>a</sup>Yields determined by <sup>1</sup>H NMR using 2,4-dinitrotoluene as the internal standard.

**Table S5: Stoichiometry optimization**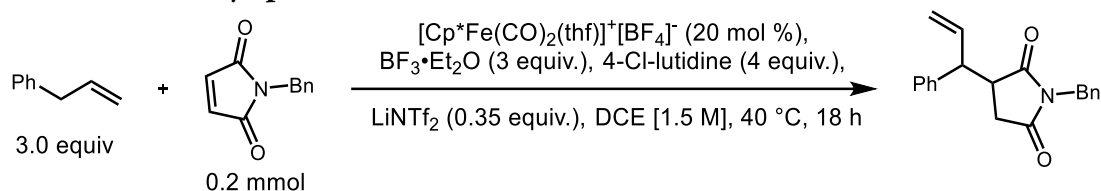

| Entry        | Ratio (Lewis Acid/Base) | NMR Maleimide SM (%) | NMR Yield (%) <sup>a</sup> |
|--------------|-------------------------|----------------------|----------------------------|
| SGS-5-147-1  | 3/4                     | 0                    | 64                         |
| SGS-5-158-1  | 3/3                     | 0                    | 45                         |
| SGS-5-158-2  | 2.2/4                   | 0                    | 69                         |
| SGS-5-158-3  | 2.2/3                   | 0                    | 57                         |
| SGS-5-158-5  | 2.2/5                   | 0                    | 70                         |
| SGS-5-158-6B | 1.0/4                   | 0                    | 71                         |
| SGS-5-158-4  | 1.5/4                   | 0                    | 80                         |
| SGS-5-158-7  | 1.5/4 + 8hr run time    | 9                    | 53                         |

<sup>a</sup>Yields determined by <sup>1</sup>H NMR using 2,4-dinitrotoluene as the internal standard.

**Table S6: Diastereomeric ratio optimization**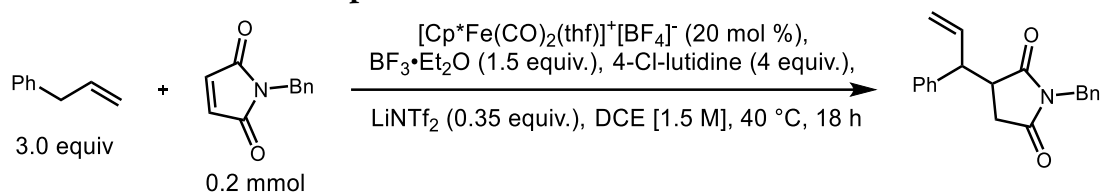

| Entry      | Variation from Standard Conditions | NMR Maleimide SM (%) | NMR Yield (%) <sup>a</sup> | d.r.  |
|------------|------------------------------------|----------------------|----------------------------|-------|
| SGS-6-11-1 | none                               | 0                    | 83                         | 3.7:1 |
| SGS-6-11-2 | 35 °C                              | 0                    | 82                         | 3.8:1 |
| SGS-6-11-3 | 30 °C                              | 0                    | 55                         | 4.2:1 |
| SGS-6-11-5 | 0.6 equiv LiNTf <sub>2</sub>       | 5                    | 66                         | 4.0:1 |
| SGS-6-11-6 | 0.2 equiv LiNTf <sub>2</sub>       | 4                    | 74                         | 3.9:1 |

<sup>a</sup>Yields determined by <sup>1</sup>H NMR using 2,4-dinitrotoluene as the internal standard.

**Table S7: Additive optimization for diastereomeric ratio**

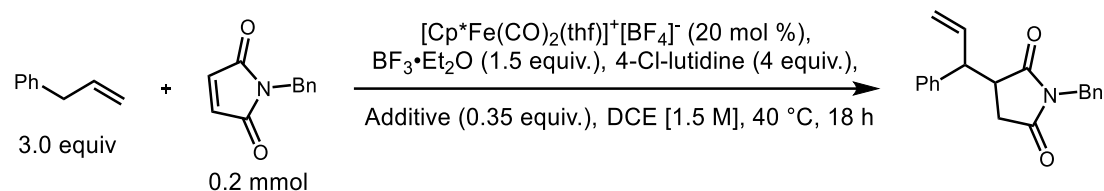

| Entry       | Additive                           | NMR Maleimide SM (%) | NMR Yield (%) <sup>a</sup> | d.r.  |
|-------------|------------------------------------|----------------------|----------------------------|-------|
| SGS-6-11-4  | CuNTf <sub>2</sub>                 | 61                   | 17                         | 3.8:1 |
| SGS-5-185-1 | Ca(NTf <sub>2</sub> ) <sub>2</sub> | 86                   | <i>trace</i>               | -     |
| SGS-5-185-2 | Mg(NTf <sub>2</sub> ) <sub>2</sub> | 21                   | 75                         | 6.4:1 |
| SGS-5-185-3 | Zn(NTf <sub>2</sub> ) <sub>2</sub> | 0                    | 19                         | 1.7:1 |
| SGS-5-185-4 | Zn(OTf) <sub>2</sub>               | 60                   | 20                         | 5.7:1 |
| SGS-5-185-5 | LiOTf                              | 58                   | 29                         | 6.4:1 |
| SGS-5-185-6 | AgNTf <sub>2</sub>                 | 0                    | 77                         | 7.3:1 |
| SGS-5-187-1 | Yb(OTf) <sub>3</sub>               | 80                   | 12                         | -     |
| SGS-5-187-2 | Bi(OTf) <sub>3</sub>               | 80                   | <10                        | -     |
| SGS-5-187-4 | AgOTf                              | 89                   | 0                          | -     |
| SGS-5-187-5 | Eu(OTf) <sub>3</sub>               | 96                   | 0                          | -     |
| SGS-5-187-6 | Er(OTf) <sub>3</sub>               | 87                   | <10                        | -     |
| SGS-7-14-1  | Tritylium tetrafluoroborate        | 43                   | 12                         | 5.8:1 |
| SGS-7-14-2  | Triphenyl borane                   | 40                   | 10                         | 6.0:1 |

<sup>a</sup>Yields determined by <sup>1</sup>H NMR using 2,4-dinitrotoluene as the internal standard.

**Table S8: Exploration with silver bistriflimide additive**

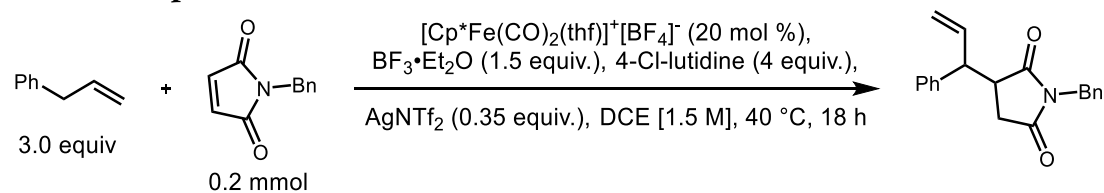

| Entry       | Variation from Standard Conditions | NMR Maleimide SM (%) | NMR Yield (%) <sup>a</sup> | d.r.  |
|-------------|------------------------------------|----------------------|----------------------------|-------|
| SGS-5-185-6 | none                               | 0                    | 77                         | 7.3:1 |

|             |                                                              |     |                   |        |
|-------------|--------------------------------------------------------------|-----|-------------------|--------|
| SGS-5-188-8 | 0.5 equiv additive                                           | 8   | 63                | 6.8:1  |
| SGS-5-188-7 | 0.3 equiv additive                                           | 11  | 67                | 6.3:1  |
| SGS-5-188-5 | No additive                                                  | 41  | 25                | 6.4:1  |
| SGS-5-189-1 | No BF <sub>3</sub> •Et <sub>2</sub> O                        | 88  | 0                 | -      |
| SGS-5-188-9 | No Catalyst                                                  | 100 | 0                 | -      |
| SGS-5-188-6 | Toluene as solvent                                           | 8   | 75                | 7.2:1  |
| SGS-5-192   | Toluene as solvent<br>+ 24 hr reaction                       | 0   | (89) <sup>b</sup> | 7.6:1  |
| SGS-7-1     | No Additive +<br>Toluene as solvent<br>+ 24 hr reaction      | 67  | 9                 | 6.3:1  |
| SGS-7-7     | Toluene as solvent<br>+ 24 hr reaction + lutidine as<br>base | 61  | 27                | 6.7:1  |
| SGS-7-18    | Pentaethyl substituted<br>cyclopentadiene ligand             | 21  | 24                | 14.3:1 |

<sup>a</sup>Yields determined by <sup>1</sup>H NMR using 2,4-dinitrotoluene as the internal standard. <sup>b</sup>Isolated Yield.

## 5.2 Optimization of *N*-Acyl-Oxazolidinone Michael Acceptors

**Table S9. Reaction discovery and Lewis acid investigation**

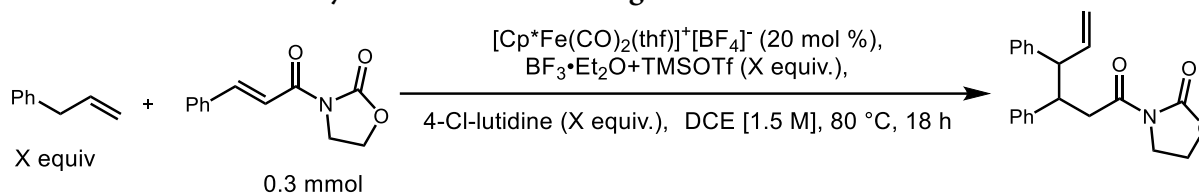

| Entry      | Additive (20%)       | Ratio (alkene/Co-Lewis Acids/Base) | Temp. (°C) | NMR SM (%) | NMR Yield (%) <sup>a</sup> | d.r.  |
|------------|----------------------|------------------------------------|------------|------------|----------------------------|-------|
| SGS-4-96-1 | None                 | 2/2/3                              | 80         | 19         | 17                         | 2.4:1 |
| SGS-4-96-2 | Yb(OTf) <sub>3</sub> | 2/2/3                              | 80         | 30         | 19                         | 2.4:1 |
| SGS-4-96-3 | CuOTf                | 2/2/3                              | 80         | 23         | 14                         | 2.0:1 |
| SGS-5-1-1  | Yb(OTf) <sub>3</sub> | 3/2/3                              | 80         | 23         | 27                         | 3.2:1 |
| SGS-5-1-2  | Yb(OTf) <sub>3</sub> | 2/2/4                              | 80         | 23         | 16                         | 2.0:1 |
| SGS-5-1-3  | Yb(OTf) <sub>3</sub> | 2/1.2/4                            | 80         | 43         | 7                          | 1.4:1 |

|            |                      |         |     |    |    |       |
|------------|----------------------|---------|-----|----|----|-------|
| SGS-5-1-4  | Yb(OTf) <sub>3</sub> | 2/1.2/3 | 80  | 47 | 14 | 2.2:1 |
| SGS-5-1-5A | Yb(OTf) <sub>3</sub> | 2/1.2/2 | 80  | 30 | 16 | 2.8:1 |
| SGS-5-1-5B | Yb(OTf) <sub>3</sub> | 3/1.2/2 | 80  | 51 | 19 | 3.2:1 |
| SGS-5-1-5C | Yb(OTf) <sub>3</sub> | 2/1.2/2 | 100 | 45 | 11 | 2.3:1 |

<sup>a</sup>Yields determined by <sup>1</sup>H NMR using 2,4-dinitrotoluene as the internal standard. Collidine = 2,4,6-trimethyl pyridine.

**Table S10. Control reactions and comparison of Lewis acids needed**

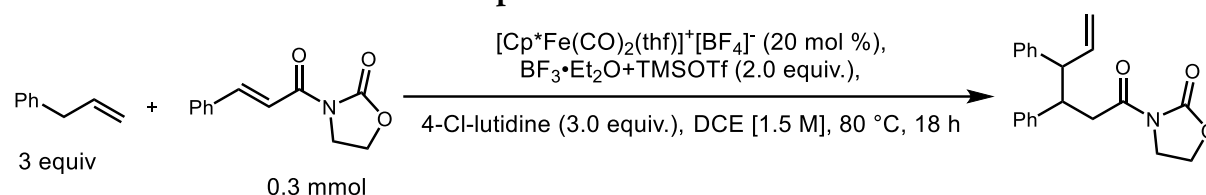

| Entry      | BF <sub>3</sub> ·Et <sub>2</sub> O | TMSOTf | Additive | NMR SM (%) | NMR Yield (%) <sup>a</sup> | d.r.  |
|------------|------------------------------------|--------|----------|------------|----------------------------|-------|
| SGS-5-1-1  | Y                                  | Y      | Y        | 23         | 27                         | 2.3:1 |
| SGS-5-16-1 | Y                                  | -      | -        | 24         | <10                        | -     |
| SGS-5-16-2 | Y                                  | -      | Y        | 58         | 0                          | -     |
| SGS-4-96-1 | Y                                  | Y      | -        | 19         | 17                         | 2.4:1 |
| SGS-5-16-3 | -                                  | Y      | -        | 79         | 0                          | -     |
| SGS-5-16-4 | -                                  | Y      | Y        | 73         | 0                          | -     |

<sup>a</sup>Yields determined by <sup>1</sup>H NMR using 2,4-dinitrotoluene as the internal standard. Collidine = 2,4,6-trimethyl pyridine.

The results of a control reaction indicated that BF<sub>3</sub>·Et<sub>2</sub>O alone is sufficient for the reaction, but the addition of TMSOTf and Additive increase the yield. Reactions tried with the stronger base 2,4,6-trimethyl pyridine gave no product, presumably because it ties up more of the available Lewis acid. Together, these indicate that a significant increase in the amount of Lewis acid is necessary.

**Table S11. Increasing free Lewis acid**

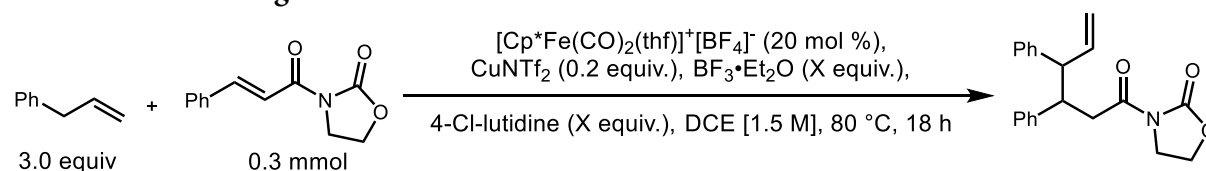

| Entry | Ratio (BF <sub>3</sub> ·Et <sub>2</sub> O/Base) | Base | NMR SM (%) | NMR Yield (%) <sup>a</sup> | d.r. |
|-------|-------------------------------------------------|------|------------|----------------------------|------|
|-------|-------------------------------------------------|------|------------|----------------------------|------|



|            |       |               |    |       |       |
|------------|-------|---------------|----|-------|-------|
| SGS-5-19-1 | 3/3   | 4-Cl-Lutidine | 19 | 41    | 2.6:1 |
| SGS-5-19-2 | 2/2   | Collidine     | 48 | 21    | 3.9:1 |
| SGS-5-19-3 | 3/3   | Collidine     | 31 | 19    | 6.1:1 |
| SGS-5-19-4 | 4/3   | Collidine     | 47 | 29    | 6.6:1 |
| SGS-5-21-1 | 4/3   | 4-Cl-Lutidine | 4  | 39    | 2.1:1 |
| SGS-5-21-2 | 3/2   | 4-Cl-Lutidine | 44 | trace | -     |
| SGS-5-21-3 | 4/2   | Collidine     | 39 | <10%  | -     |
| SGS-5-24-1 | 3/2   | Collidine     | 20 | 21    | -     |
| SGS-5-24-2 | 3/1.2 | Collidine     | 35 | 0     | -     |
| SGS-5-24-3 | 3/1.2 | Collidine     | 63 | 0     | -     |
| SGS-5-24-4 | 5/3   | Collidine     | 9  | 35    | 2.4:1 |
| SGS-5-36-1 | 5/3   | 4-Cl-Lutidine | 48 | 46    | 3.8:1 |

<sup>a</sup>Yields determined by <sup>1</sup>H NMR using 2,4-dinitrotoluene as the internal standard. Collidine = 2,4,6-trimethyl pyridine.

These results validate the hypothesis that significant free BF<sub>3</sub>•Et<sub>2</sub>O is needed in the reaction. Good yields are observed with equivalents of Lewis acid greater than the equivalents of base, which was unprecedented for our group's explorations of cyclopentadienyldicarbonyl iron complex catalysis.

**Table S12. Optimization of Additive**

| Entry      | Additive                           | Additive Equivalents | NMR SM (%) | NMR Yield (%) <sup>a</sup> | d.r.  |
|------------|------------------------------------|----------------------|------------|----------------------------|-------|
| SGS-5-39-4 | LiNTf <sub>2</sub>                 | 0.2                  | 18         | 67                         | 2.5:1 |
| SGS-5-39-3 | Cu(NTf <sub>2</sub> ) <sub>2</sub> | 0.2                  | 34         | 42                         | 2.8:1 |
| SGS-5-39-5 | Yb(OTf) <sub>3</sub>               | 0.2                  | 40         | 54                         | 2.7:1 |
| SGS-5-39-6 | Zn(OTf) <sub>2</sub>               | 0.2                  | 30         | 57                         | 2.8:1 |
| SGS-6-21   | LiNTf <sub>2</sub>                 | 1.0                  | 0          | 85 (88%) <sup>b</sup>      | 2.2:1 |

<sup>a</sup>Yields determined by <sup>1</sup>H NMR using 2,4-dinitrotoluene as the internal standard. <sup>b</sup>Isolated Yield.

**Table S13. Control Experiments**

| Entry     | BF <sub>3</sub> ·Et <sub>2</sub> O Equivalents | Base Equivalents | NMR SM (%) | NMR Yield (%) <sup>a</sup> | d.r.  |
|-----------|------------------------------------------------|------------------|------------|----------------------------|-------|
| SGS-7-6-1 | 1.5                                            | 4                | 54         | trace                      | -     |
| SGS-7-6-2 | 5.0                                            | 3                | 0          | 19                         | 1.4:1 |

### 5.3 Optimization of Phthalimide Michael Acceptors

**Table S14. Optimization for substituted allylbenzene derivatives**

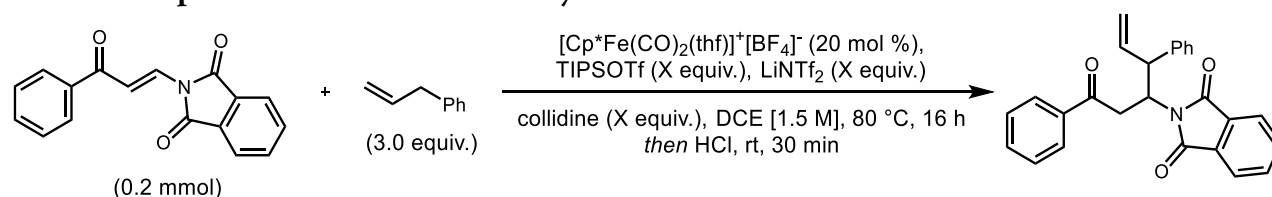

| Entry       | Ratio (SiR <sub>3</sub> /Base/additive) | Silyl Triflate | Temp. | NMR SM (%) | NMR Yield (%) <sup>a</sup> |
|-------------|-----------------------------------------|----------------|-------|------------|----------------------------|
| SGS-5-114-1 | 1.5/2.0/0.6                             | TIPSOTf        | 80    | 41         | 29                         |
| SGS-5-114-2 | 1.5/2.0/0.6                             | TMSOTf         | 80    | 23         | 18                         |
| SGS-5-144-2 | 2.5/3.0/0.6                             | TIPSOTf        | 80    | 0          | 90 (93%) <sup>b</sup>      |
| SGS-5-144-1 | 2.5/3.0/0.6                             | TMSOTf         | 80    | 0          | 37                         |
| SGS-5-144-3 | 2.5/3.0/0.3                             | TIPSOTf        | 80    | 0          | 73                         |
| SGS-5-164-1 | 2.5/3.0/0.6                             | TIPSOTf        | 60    | 0          | 85                         |

<sup>a</sup>Yields determined by <sup>1</sup>H NMR using 2,4-dinitrotoluene as the internal standard. <sup>b</sup>Isolated Yield.

**Table S15. Optimization for unactivated alkene substrates**

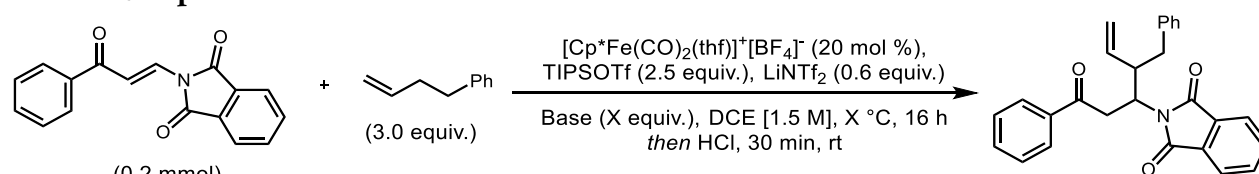

| Entry     | Temp. | Base      | Base (equiv) | NMR Yield (%) <sup>a</sup> |
|-----------|-------|-----------|--------------|----------------------------|
| SGS-6-3-1 | 80    | Collidine | 3            | <20                        |

|           |    |           |   |                      |
|-----------|----|-----------|---|----------------------|
| SGS-6-3-2 | 90 | Collidine | 3 | 30                   |
| SGS-6-3-3 | 80 | Collidine | 4 | 44                   |
| SGS-6-3-4 | 80 | TMPH      | 3 | 45                   |
| SGS-6-3-5 | 80 | TMPH      | 4 | 79 (66) <sup>b</sup> |

<sup>a</sup>Yields determined by <sup>1</sup>H NMR using 2,4-dinitrotoluene as the internal standard. <sup>b</sup>Isolated Yield. TMPH = 2,2,6,6-tetramethylpiperidine.

#### 5.4 Optimization of Sulfonamide Michael Acceptors

**Table S16. Optimization of reaction**

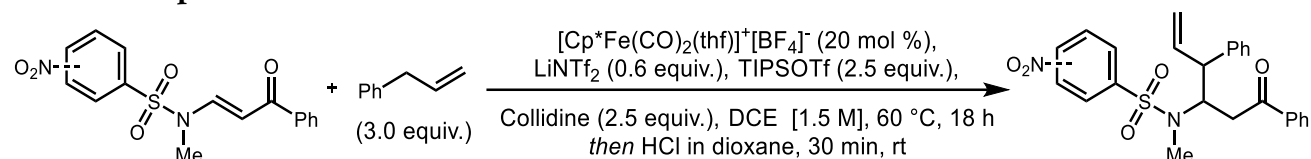

| Entry       | Solvent | Temp     | TIPSOTf equiv | Base equiv          | NMR Yield (%) | NO <sub>2</sub> | SM (%) |
|-------------|---------|----------|---------------|---------------------|---------------|-----------------|--------|
| SGS-5-146-1 | DCE     | 60       | 1.5           | 2.5 (Collidine)     | 43            | - <i>p</i>      | 0      |
| SGS-5-168-4 | DCE     | 60       | 1.5           | 2.5 (4-Cl-Lutidine) | 18            | - <i>p</i>      | 10     |
| SGS-5-146-2 | DCE     | 60       | 2.5           | 3.0 (Collidine)     | 43            | - <i>p</i>      | 0      |
| SGS-5-168-1 | DCE     | 80       | 2.5           | 3.0 (Collidine)     | 22            | - <i>p</i>      | 0      |
| SGS-5-146-3 | PhCl    | 60       | 2.5           | 3.0 (Collidine)     | 31            | - <i>p</i>      | 7      |
| SGS-5-146-5 | DCE     | 60 (8 h) | 2.5           | 3.0 (Collidine)     | 22            | - <i>p</i>      | 20     |
| SGS-5-168-3 | DCE     | 60       | 2.5           | 2.5 (Collidine)     | 46            | - <i>p</i>      | trace  |
| SGS-5-168-6 | DCE     | 50       | 2.5           | 2.5 (Collidine)     | 18            | - <i>p</i>      | 14     |
| SGS-5-168-5 | DCE     | 60       | 2.5           | 2.5 (4-Cl-Lutidine) | 35            | - <i>p</i>      | 0      |
| SGS-5-168-7 | DCE     | 60       | 2.5           | 2.5 (TMPH)          | 42            | - <i>p</i>      | trace  |

|             |     |    |                                     |                    |                      |            |   |
|-------------|-----|----|-------------------------------------|--------------------|----------------------|------------|---|
| SGS-5-168-8 | DCE | 60 | 2.5+0.6 equiv<br>LiNTf <sub>2</sub> | 2.5<br>(Collidine) | 67                   | - <i>p</i> | 0 |
| SGS-5-172-1 | DCE | 60 | 2.0+0.6 equiv<br>LiNTf <sub>2</sub> | 2.0<br>(Collidine) | 60                   | - <i>p</i> | 0 |
| SGS-5-172-2 | DCE | 60 | 2.5+0.8 equiv<br>LiNTf <sub>2</sub> | 2.5<br>(Collidine) | 67                   | - <i>p</i> | 0 |
| SGS-5-184-1 | DCE | 60 | 2.5+0.6 equiv<br>LiNTf <sub>2</sub> | 2.5<br>(Collidine) | 84 (72) <sup>b</sup> | - <i>o</i> | 0 |
| SGS-5-184-2 | DCE | 60 | 2.5+0.6 equiv<br>LiNTf <sub>2</sub> | 3.5<br>(Collidine) | 76                   | - <i>o</i> | 0 |

<sup>a</sup>Yields determined by <sup>1</sup>H NMR using 2,4-dinitrotoluene as the internal standard. Collidine = 2,4,6-trimethyl pyridine. TMPH = 2,2,6,6-tetramethylpiperidine.

## 6. Unsuccessful substrates

### Unsuccessful Michael Acceptors:

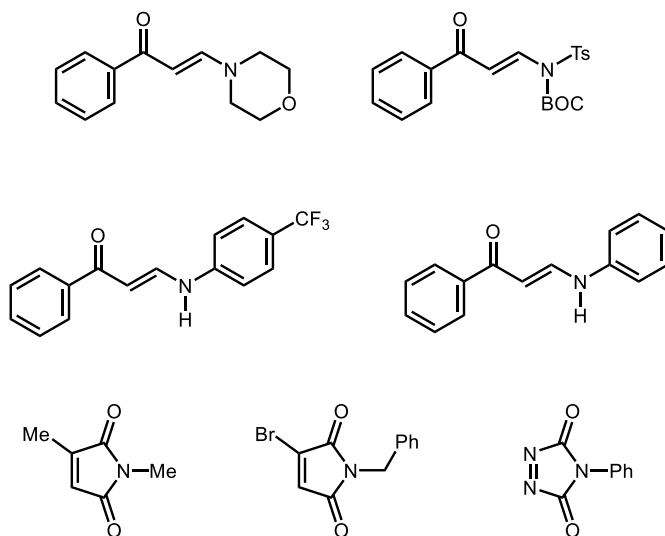

**Figure S10:** Unsuccessful nitrogen-containing Michael acceptors

## 7. Copies of NMR spectra of products and substrates

### 7.1 NMR spectra: Maleimide Scope

SGS-5-192

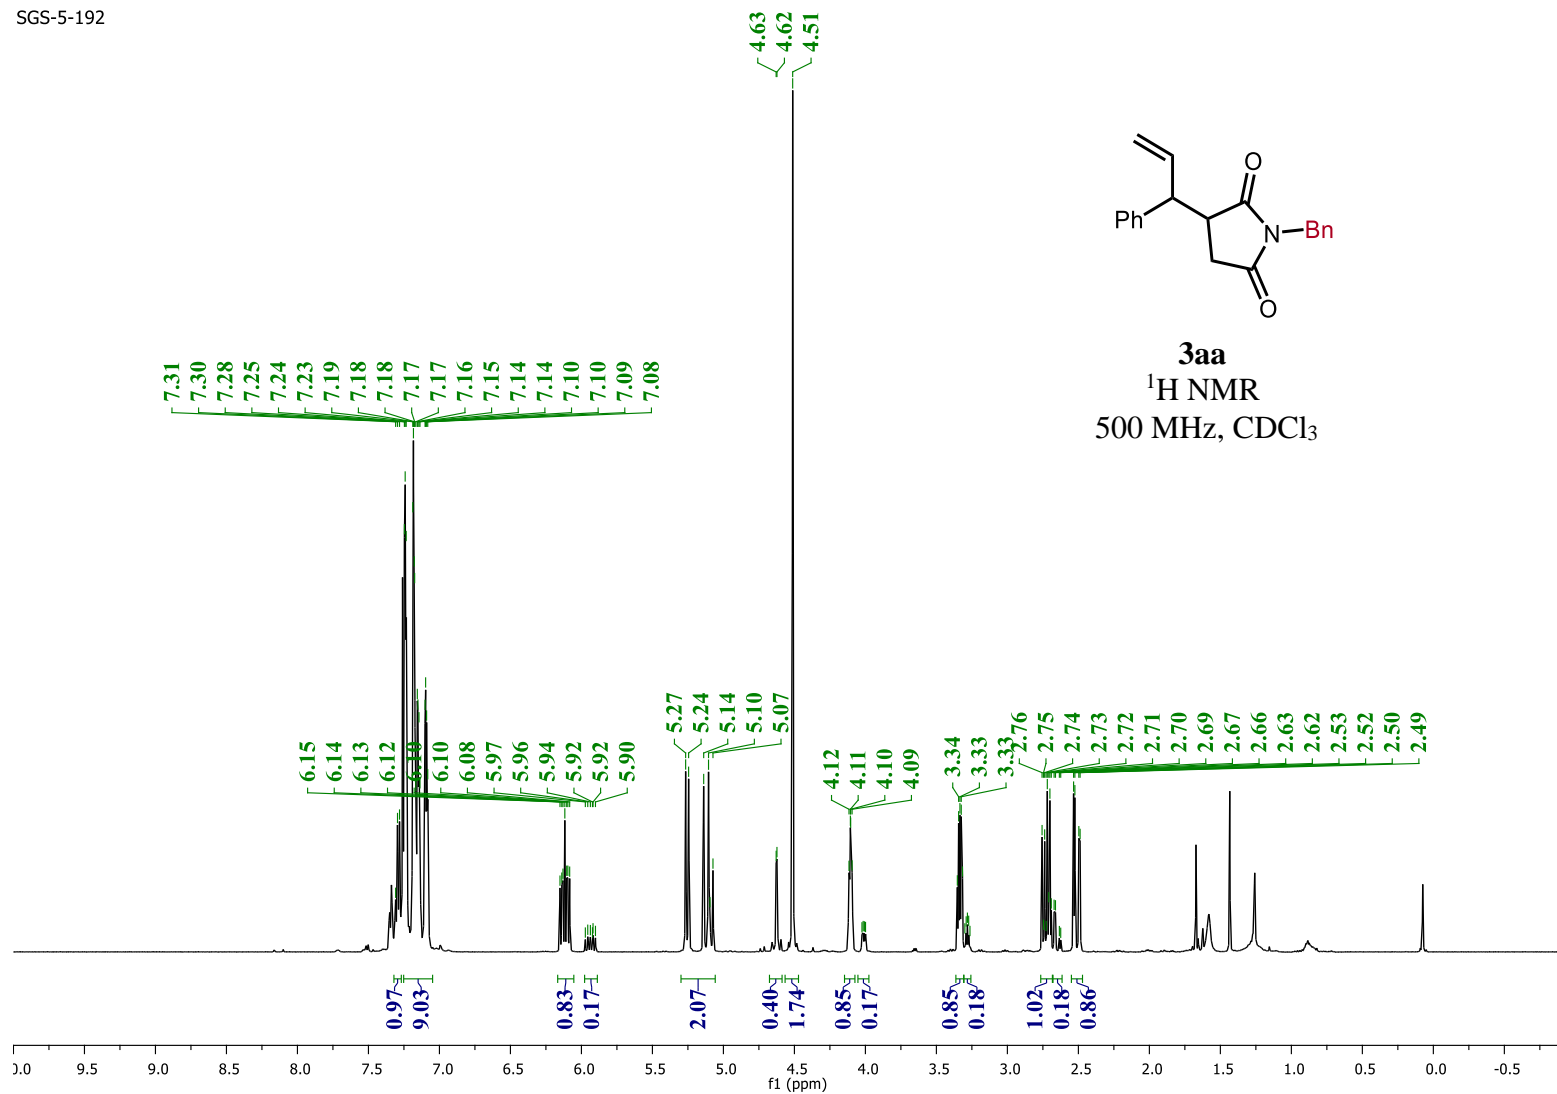

SGS-5-192 H

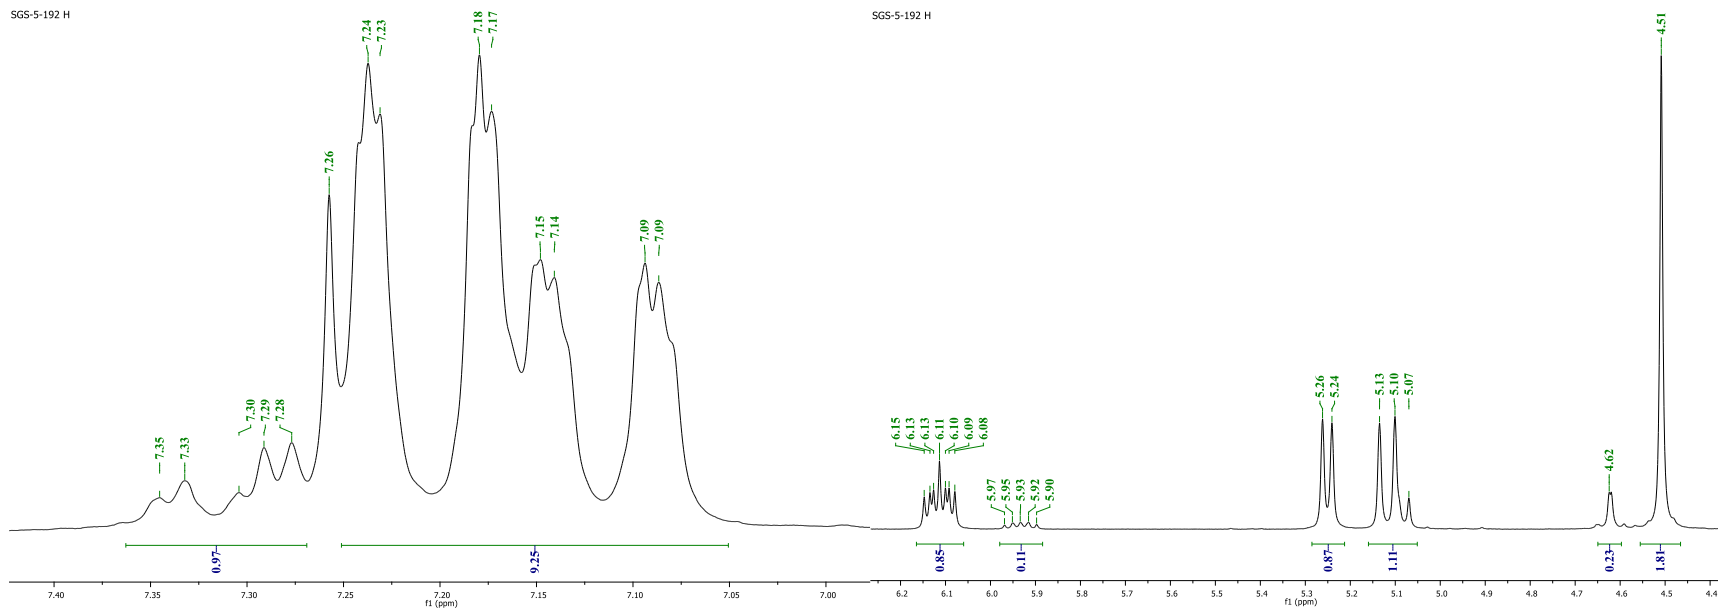

SGS-5-192 H

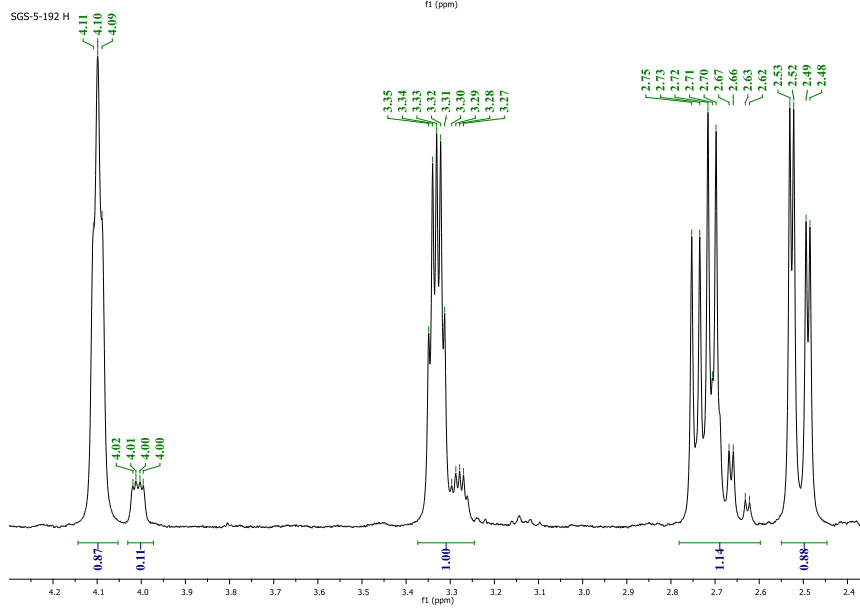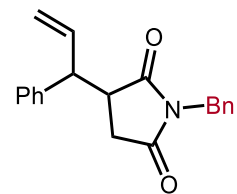

**3aa**  
<sup>1</sup>H NMR  
 500 MHz, CDCl<sub>3</sub>

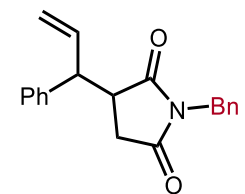

**3aa**  
<sup>13</sup>C NMR  
126 MHz, CDCl<sub>3</sub>

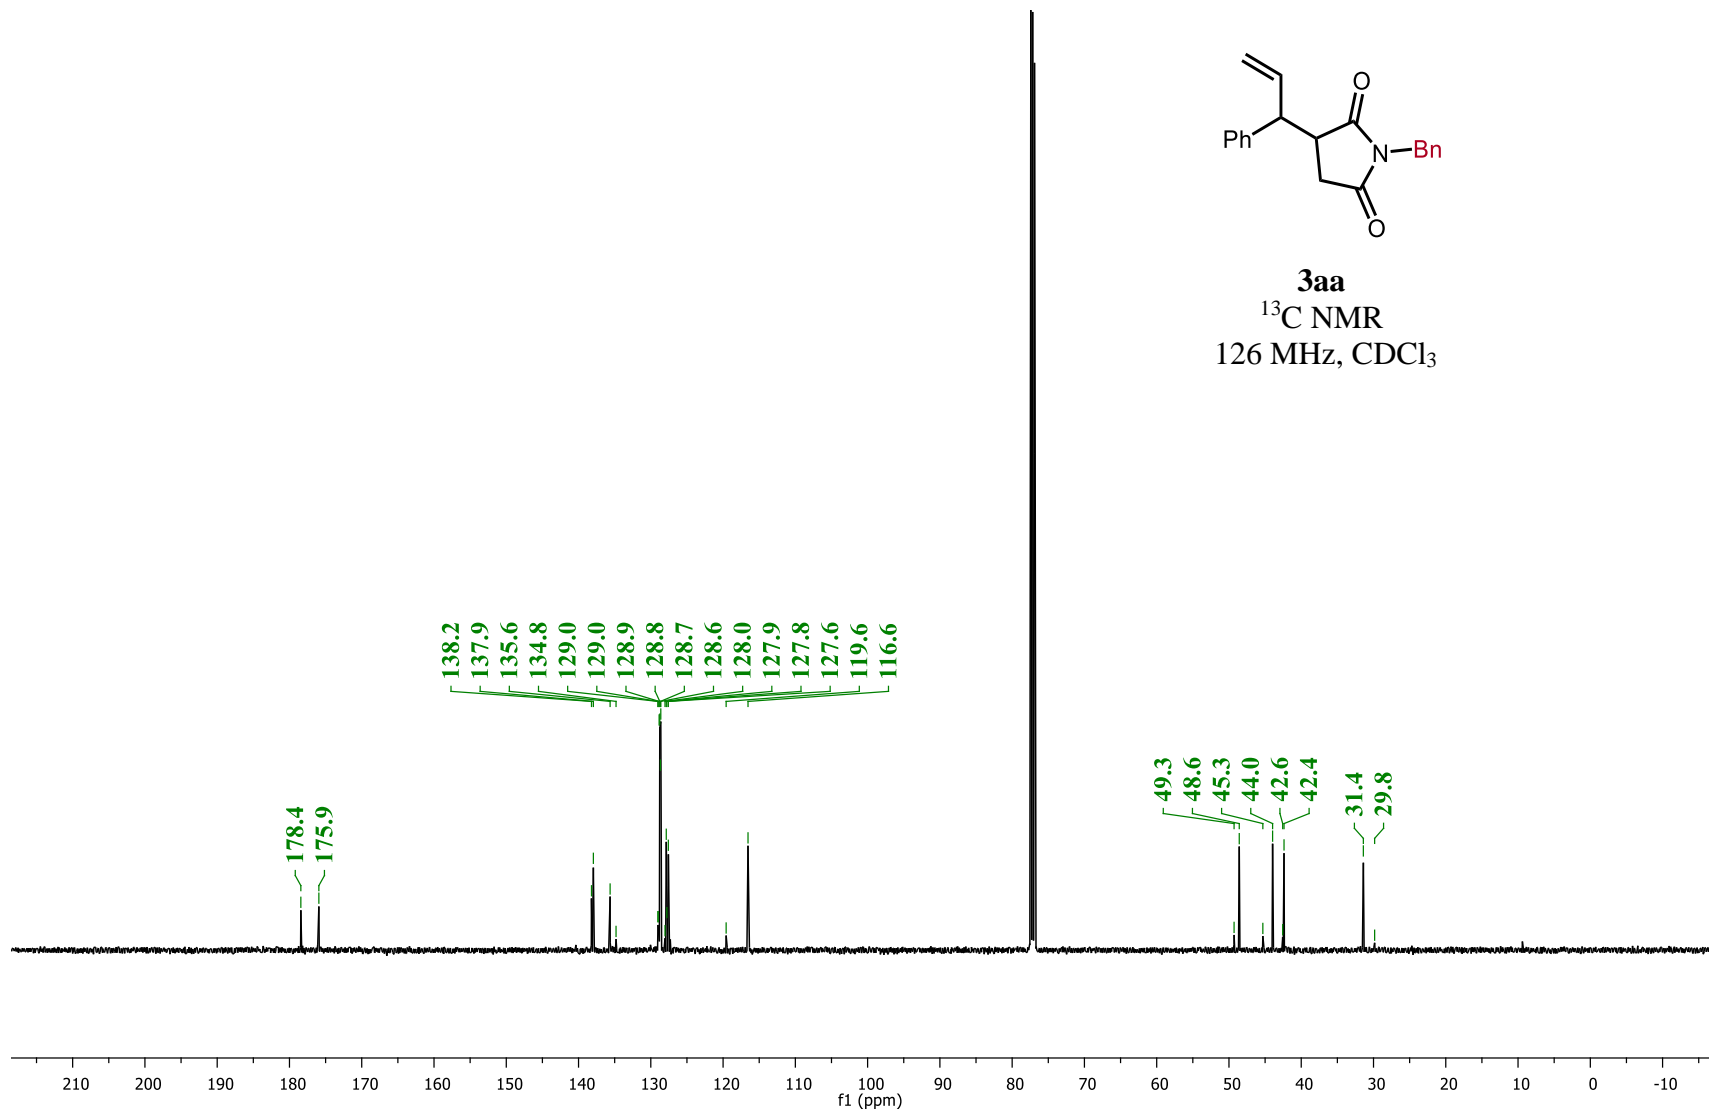

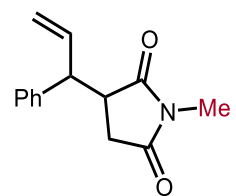

**3ba**  
<sup>1</sup>H NMR  
 500 MHz, CDCl<sub>3</sub>

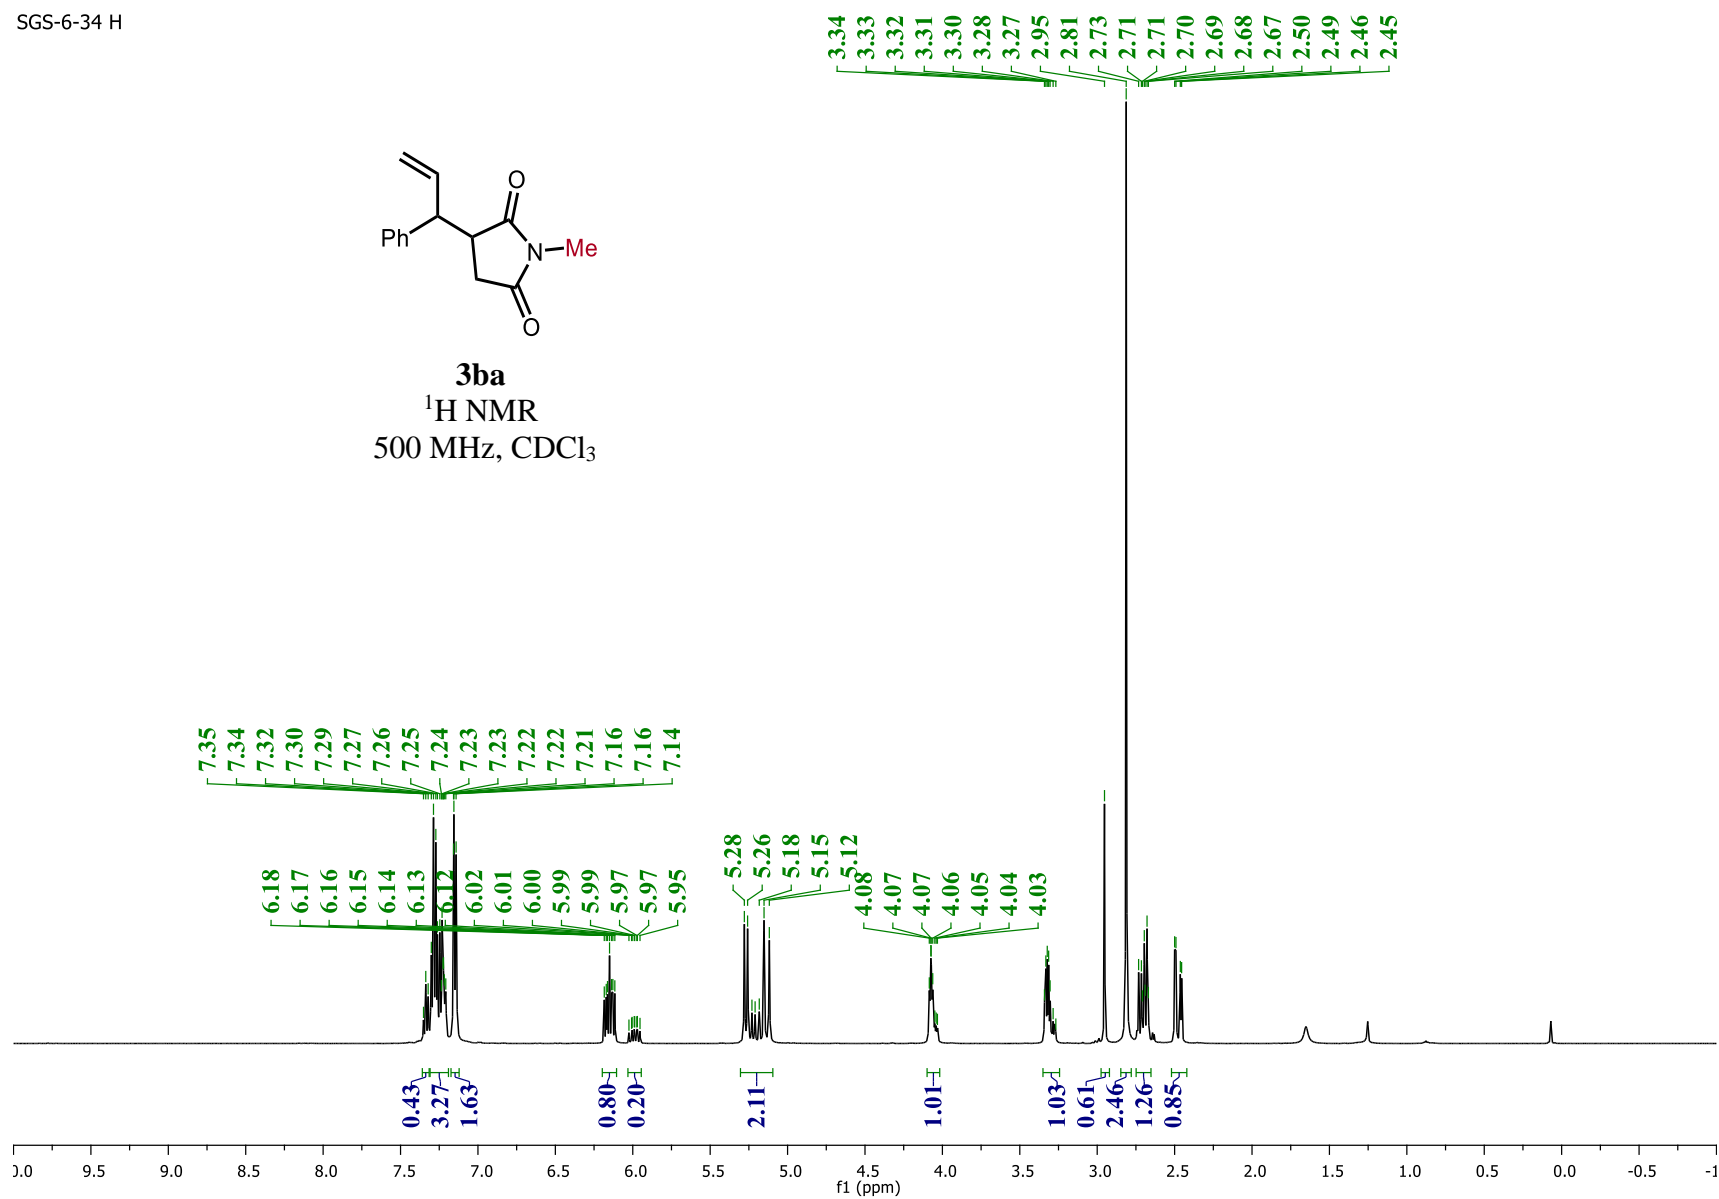



SGS-6-34 H

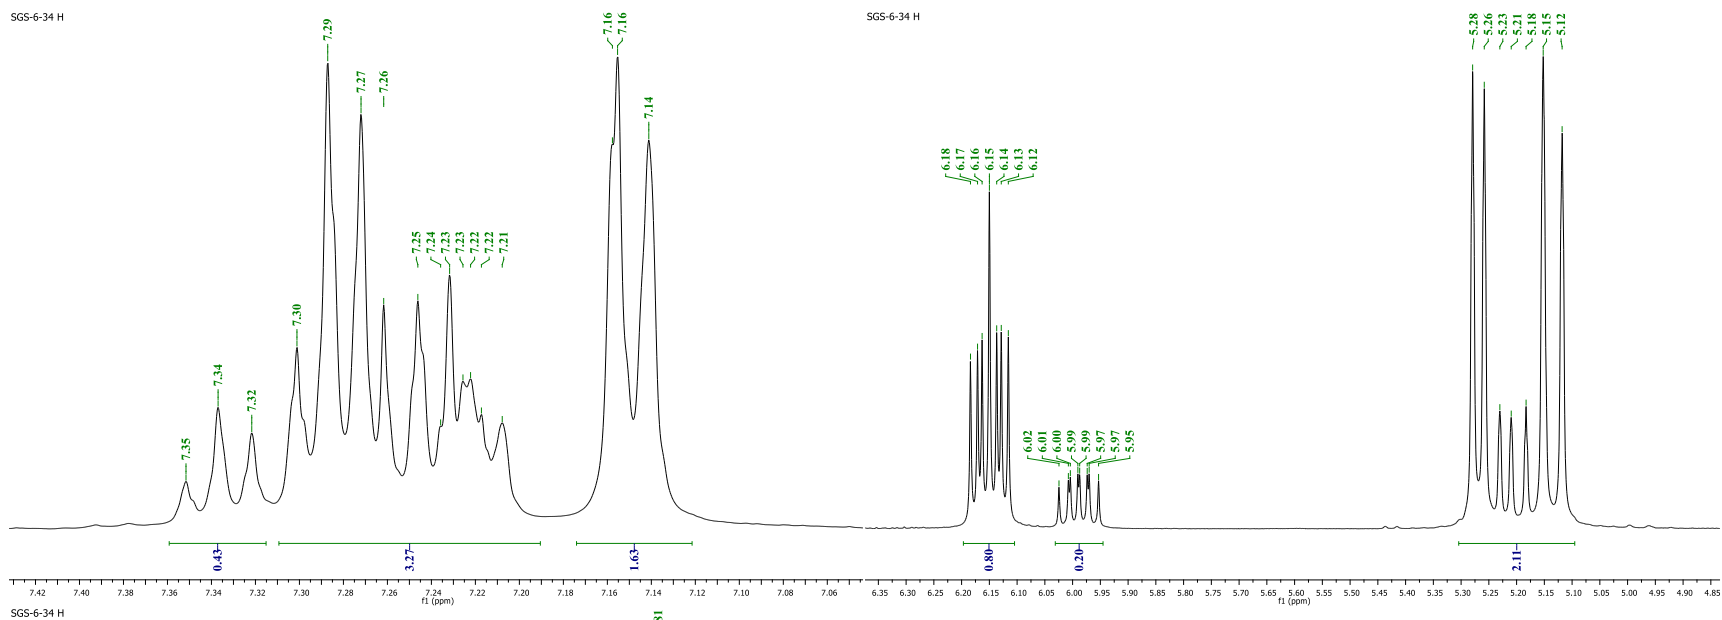

SGS-6-34 H

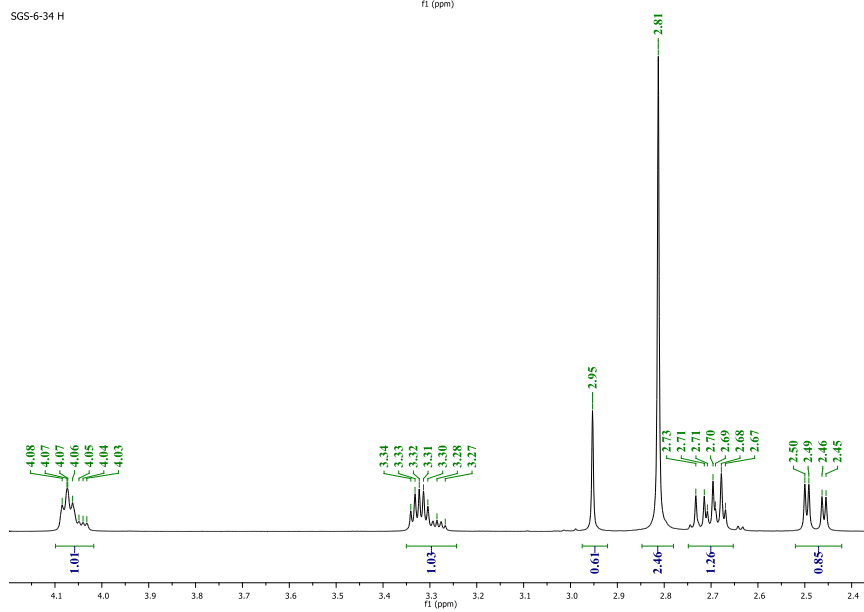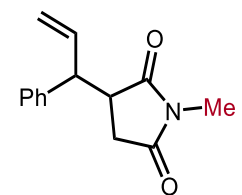

**3ba**  
<sup>1</sup>H NMR  
 500 MHz, CDCl<sub>3</sub>

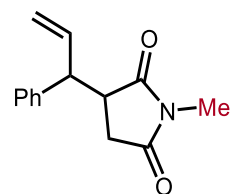

**3ba**  
<sup>13</sup>C NMR  
126 MHz, CDCl<sub>3</sub>

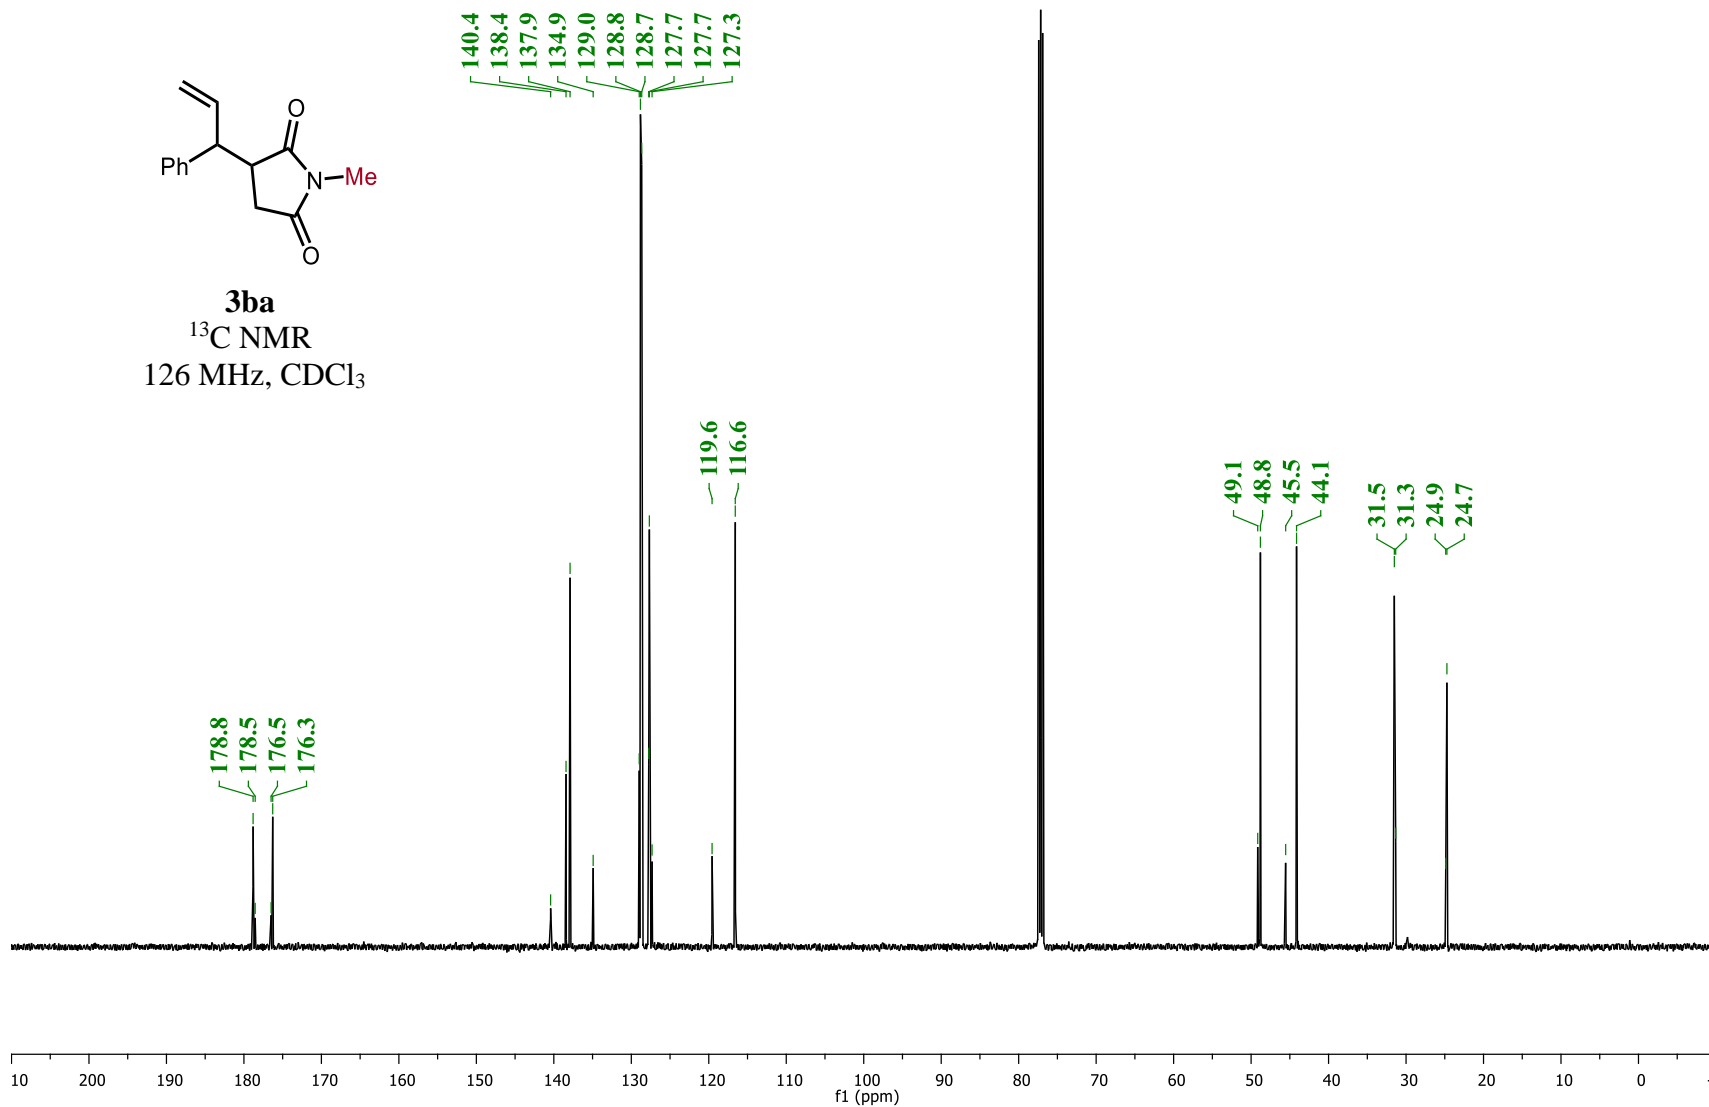

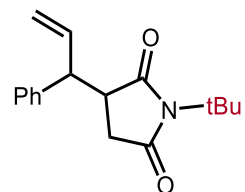

**3ca**  
<sup>1</sup>H NMR  
 500 MHz, CDCl<sub>3</sub>

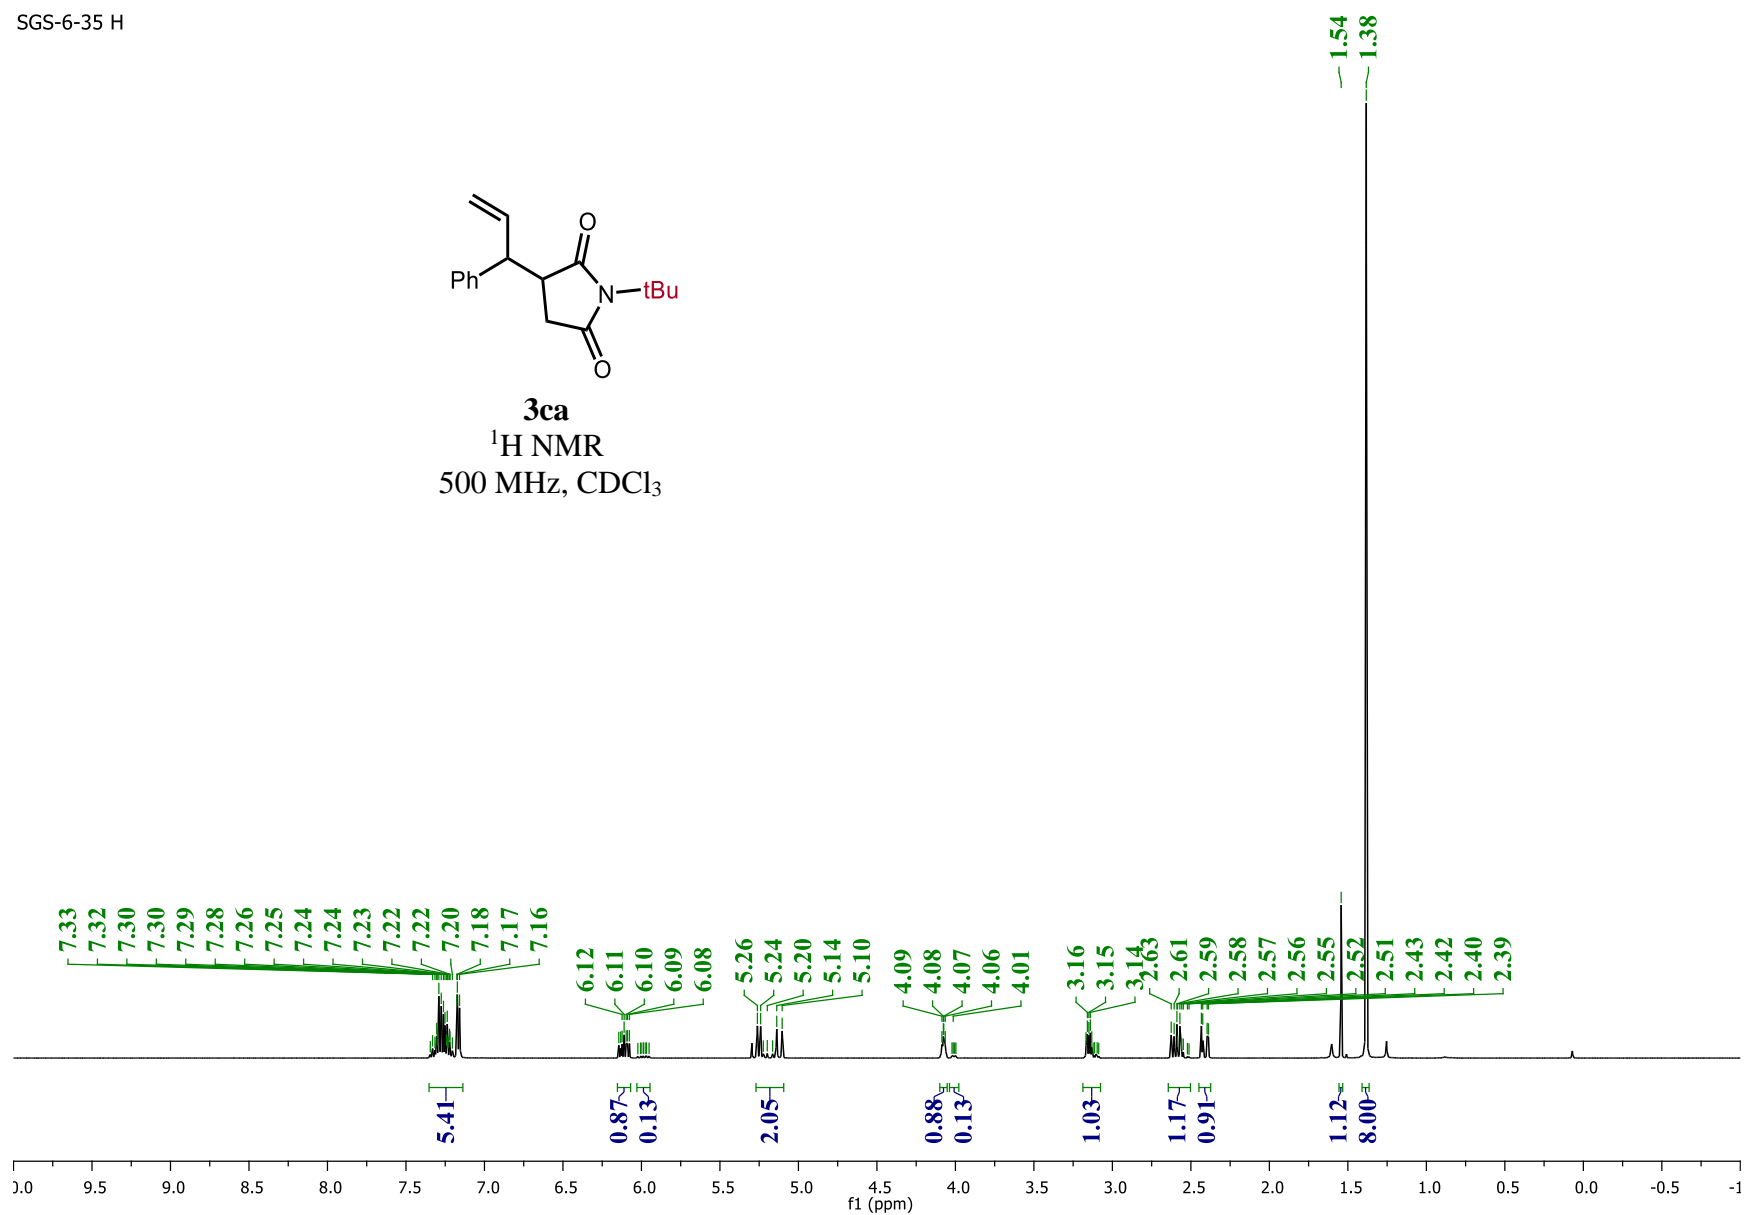

SGS-6-35 H

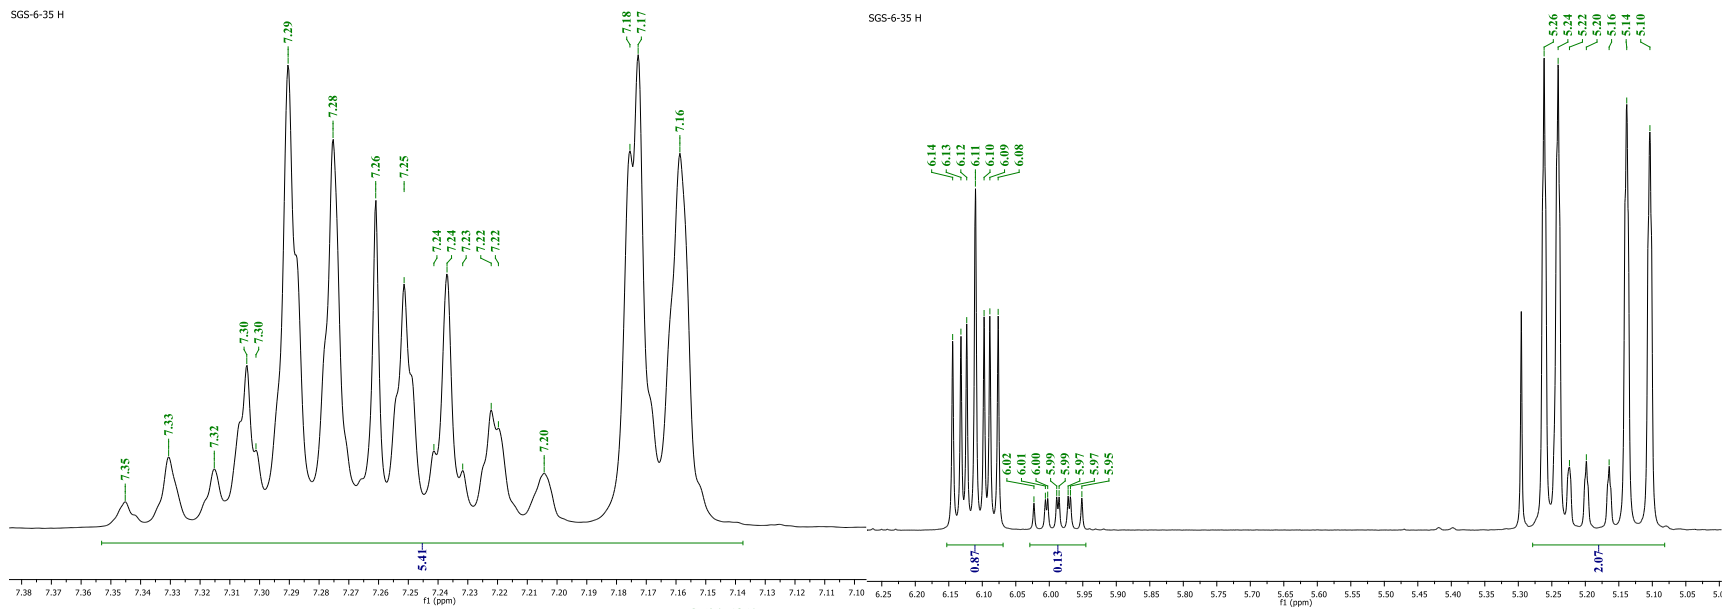

SGS-6-35 H

SGS-6-35 H

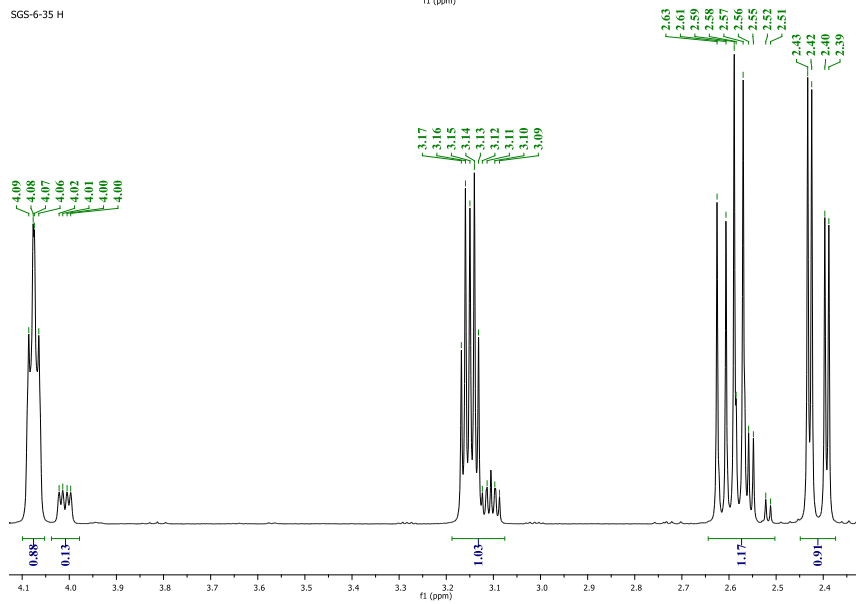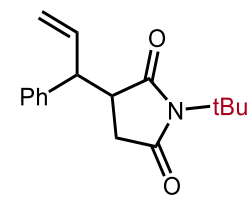

**3a**  
<sup>1</sup>H NMR  
 500 MHz, CDCl<sub>3</sub>

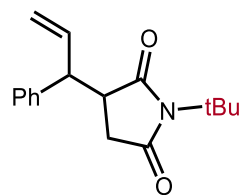

**3ca**  
<sup>13</sup>C NMR  
 126 MHz, CDCl<sub>3</sub>

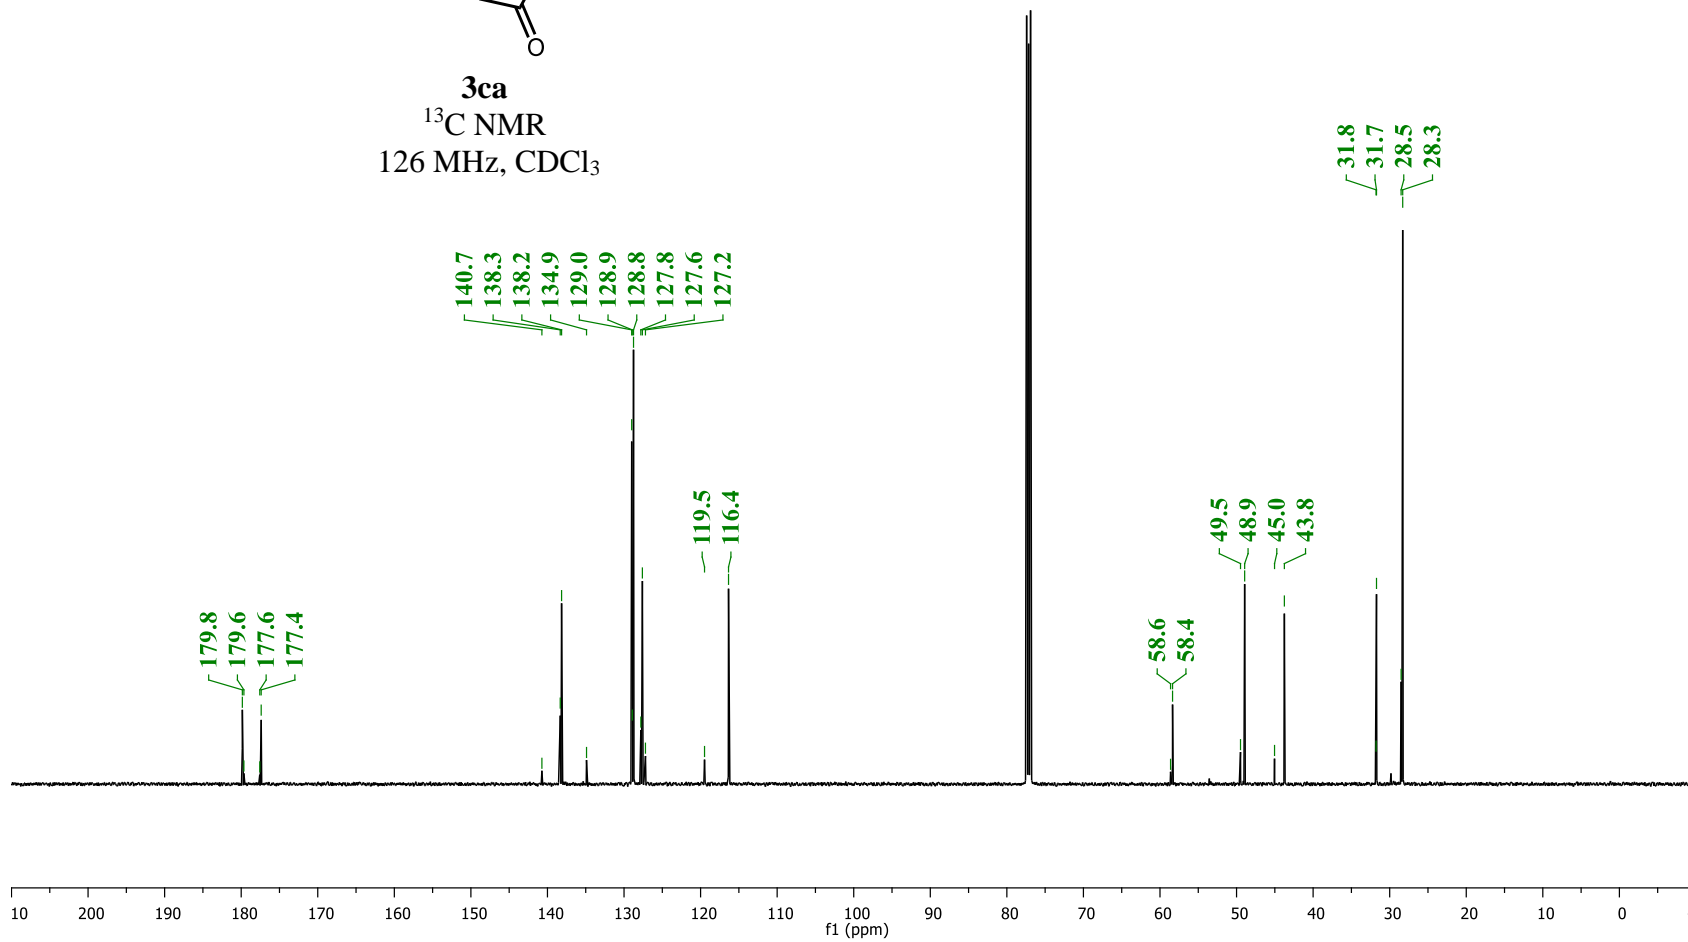



SGS-6-24 H

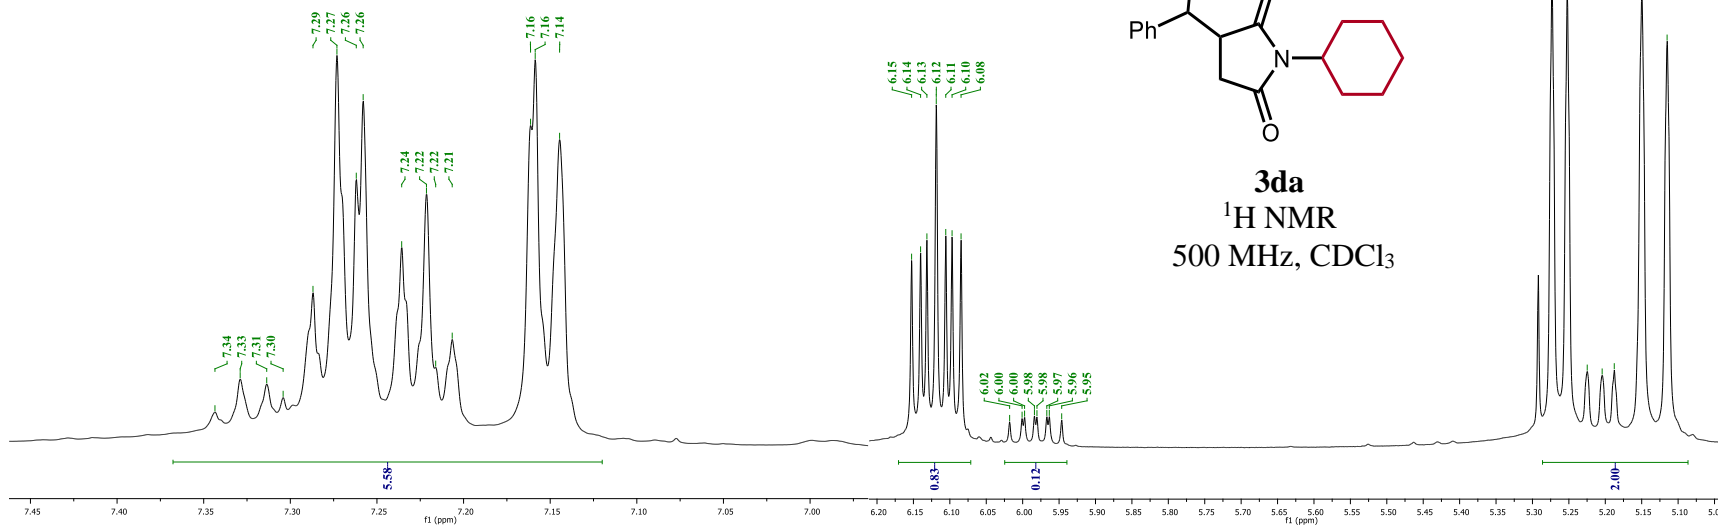

SGS-6-24 H

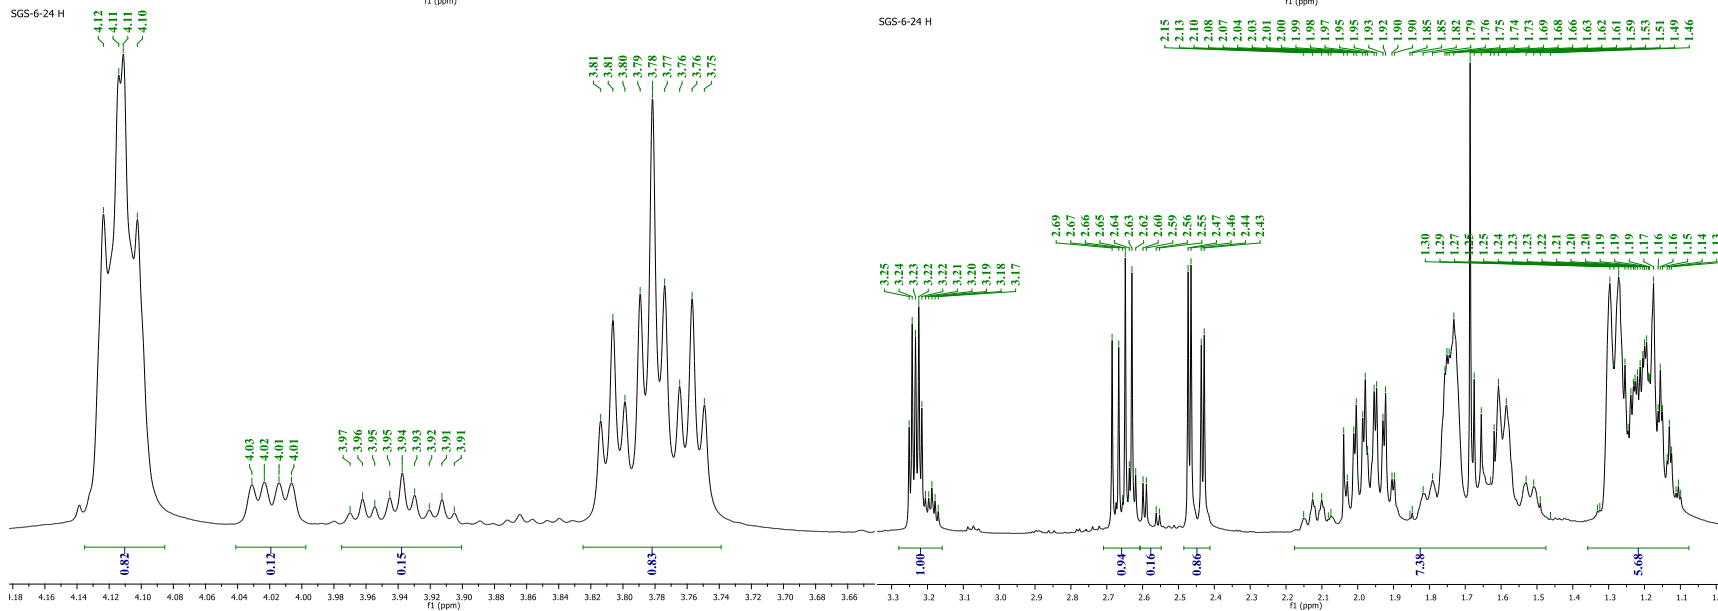

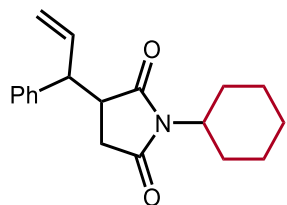

**3da**  
<sup>13</sup>C NMR  
 126 MHz, CDCl<sub>3</sub>

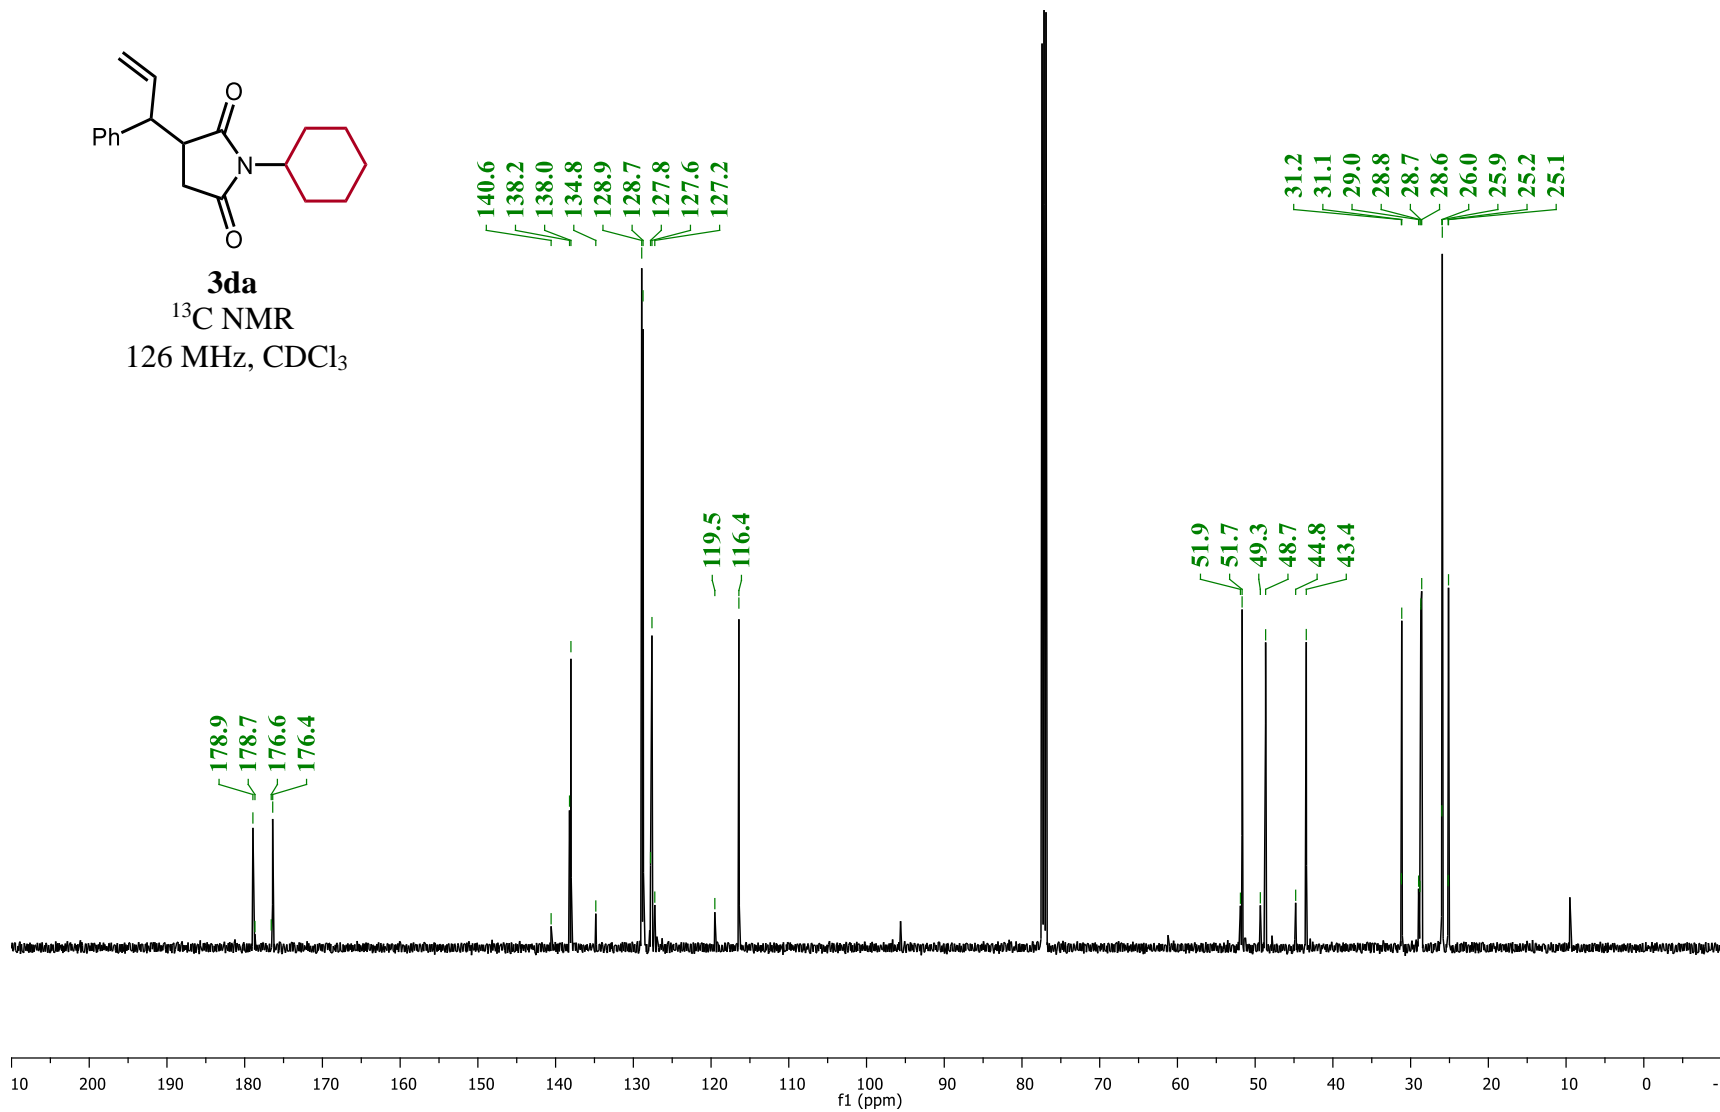



SGS-6-44 H

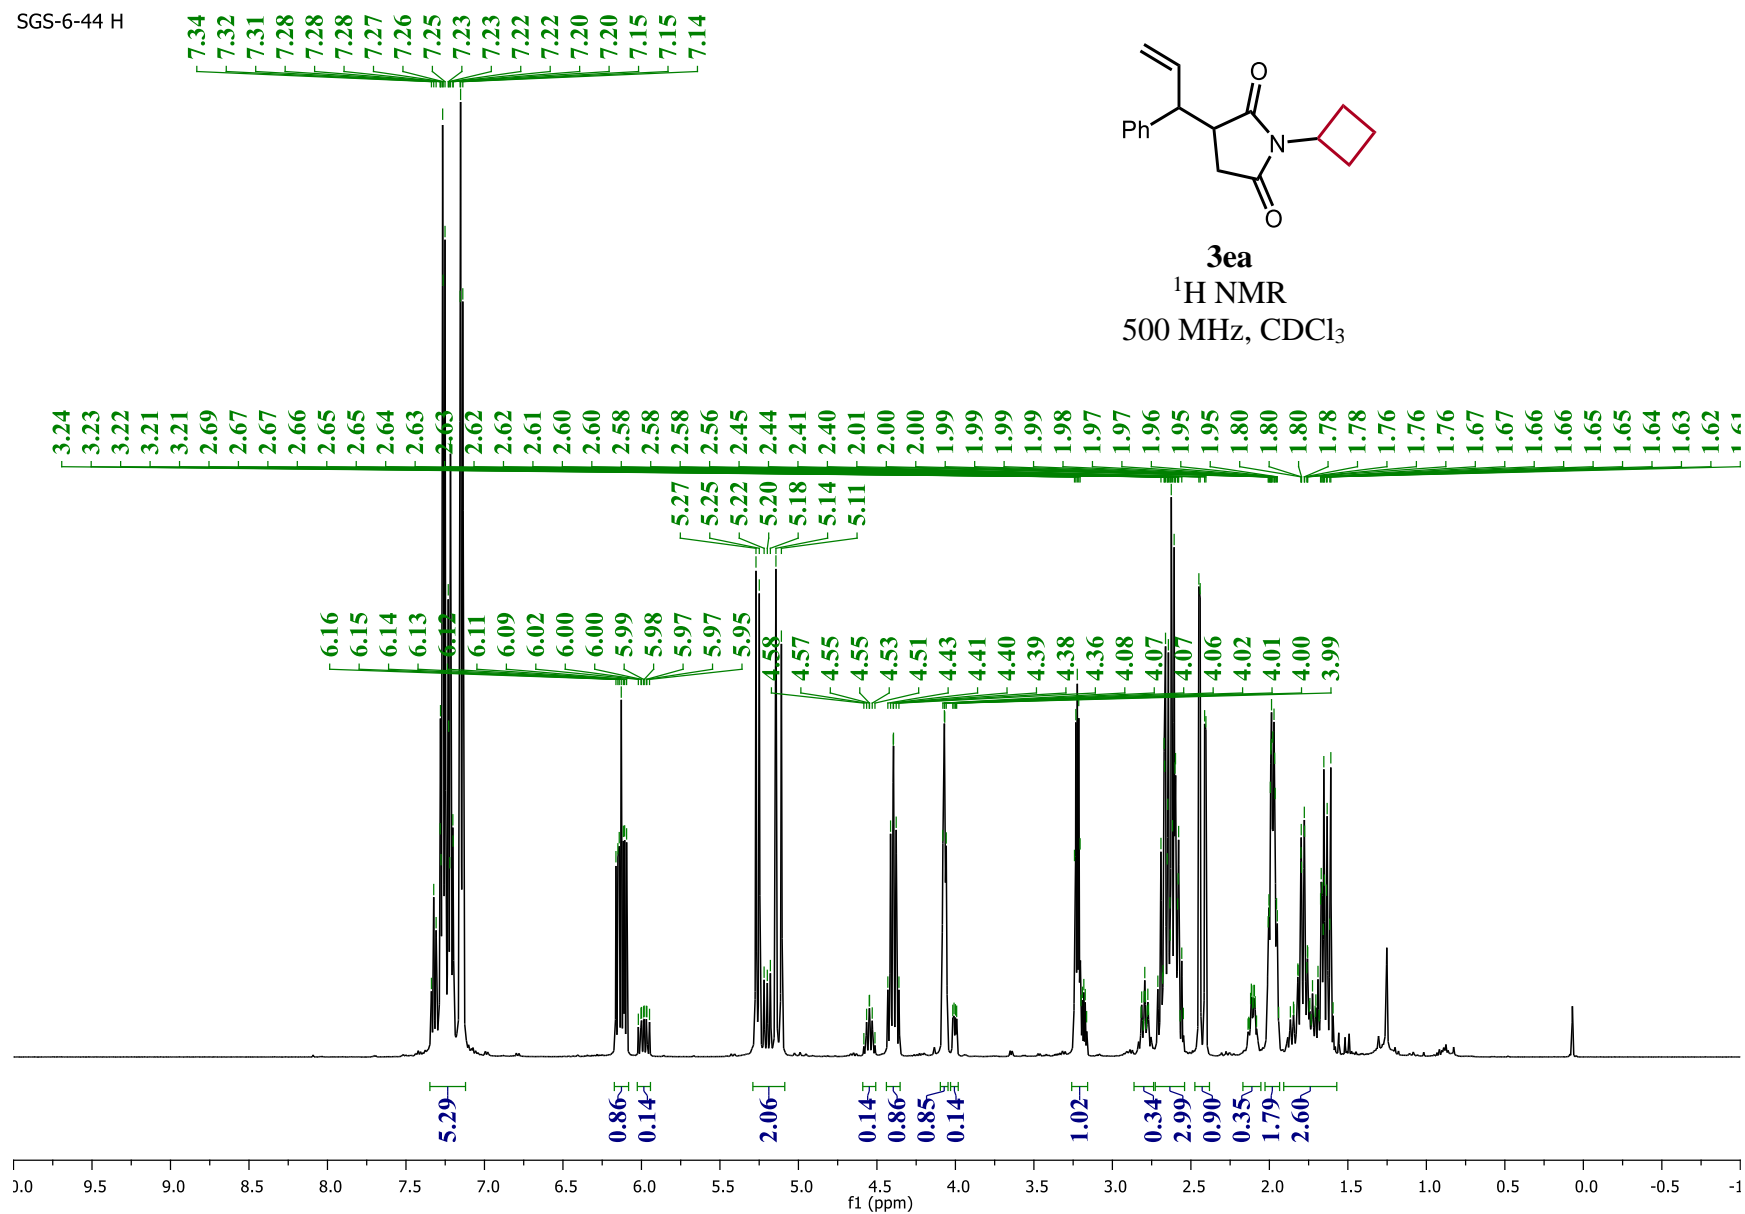

SG5-6-44 H

SG5-6-44 H

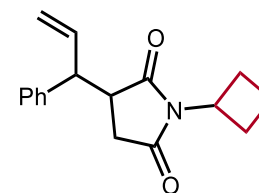

**3ea**  
 $^1\text{H}$  NMR  
 500 MHz,  $\text{CDCl}_3$

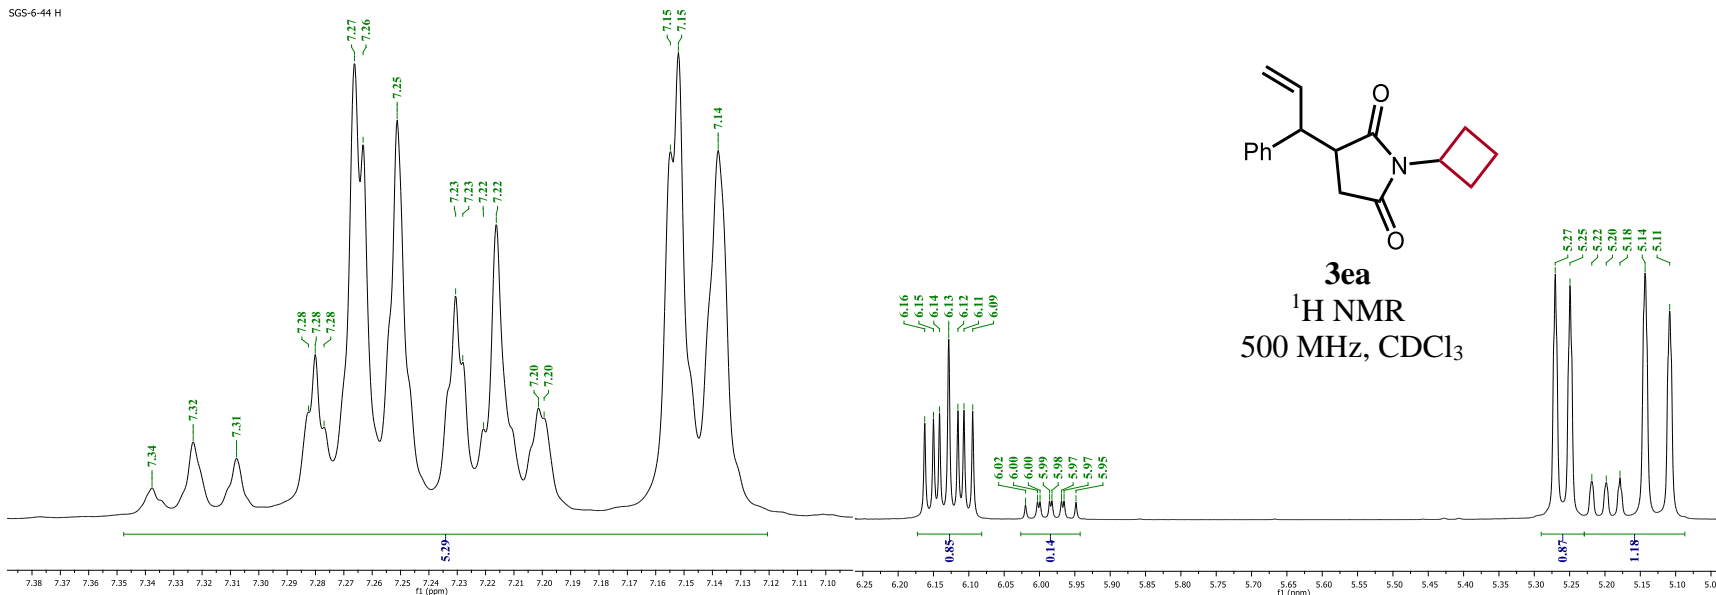

SG5-6-44 H

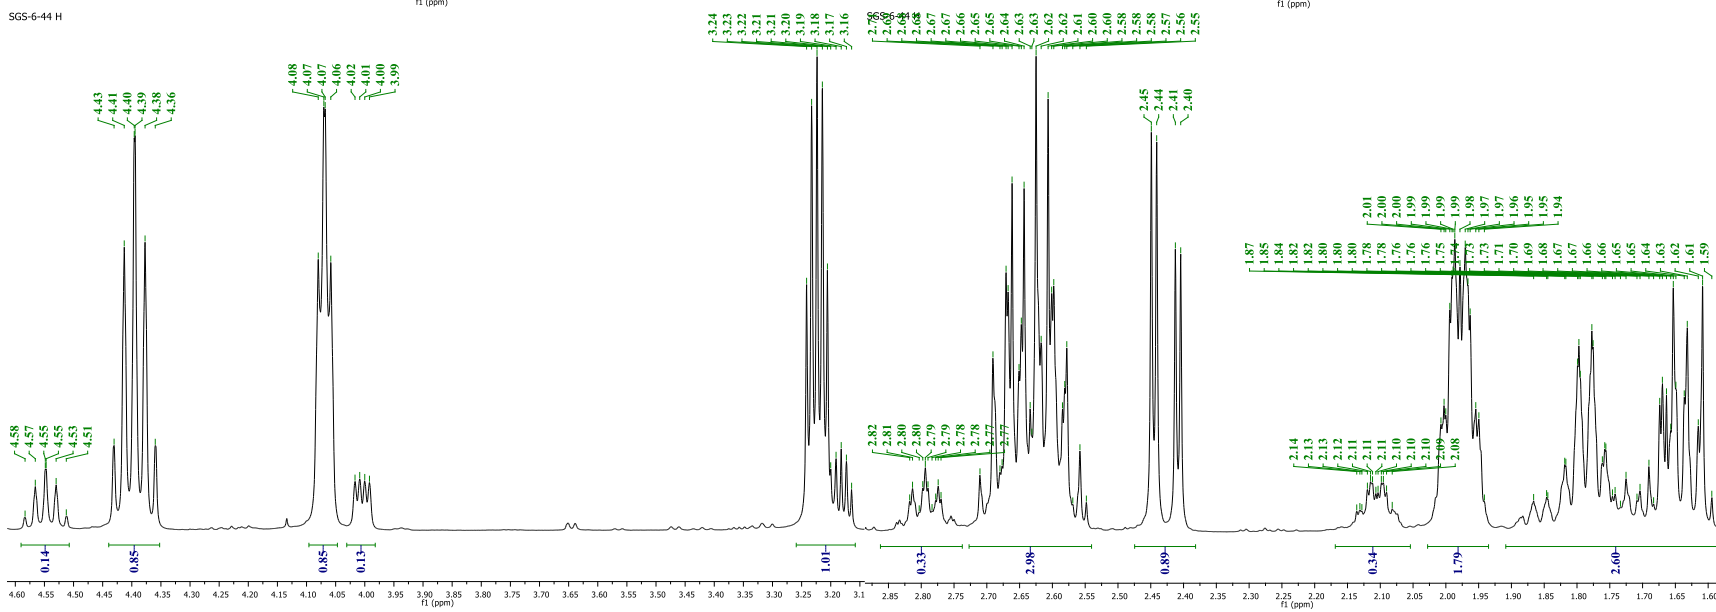

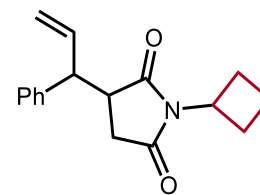

**3ea**  
<sup>13</sup>C NMR  
 126 MHz, CDCl<sub>3</sub>

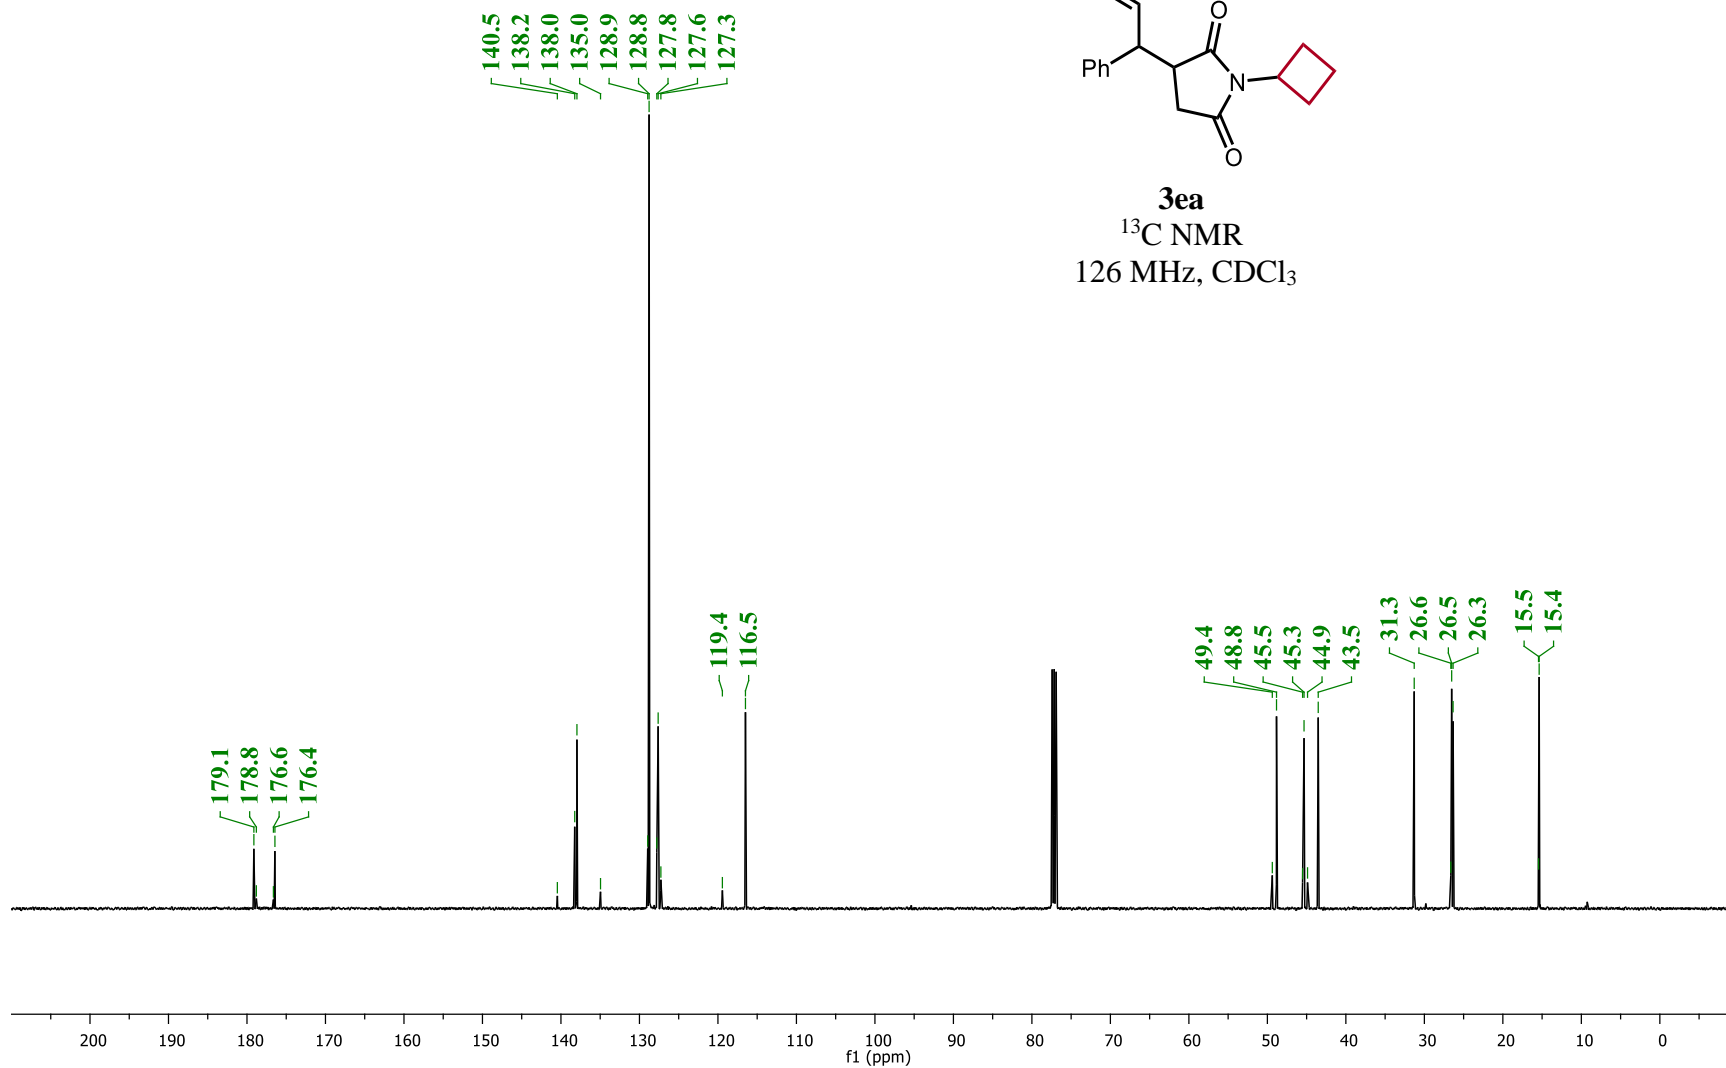

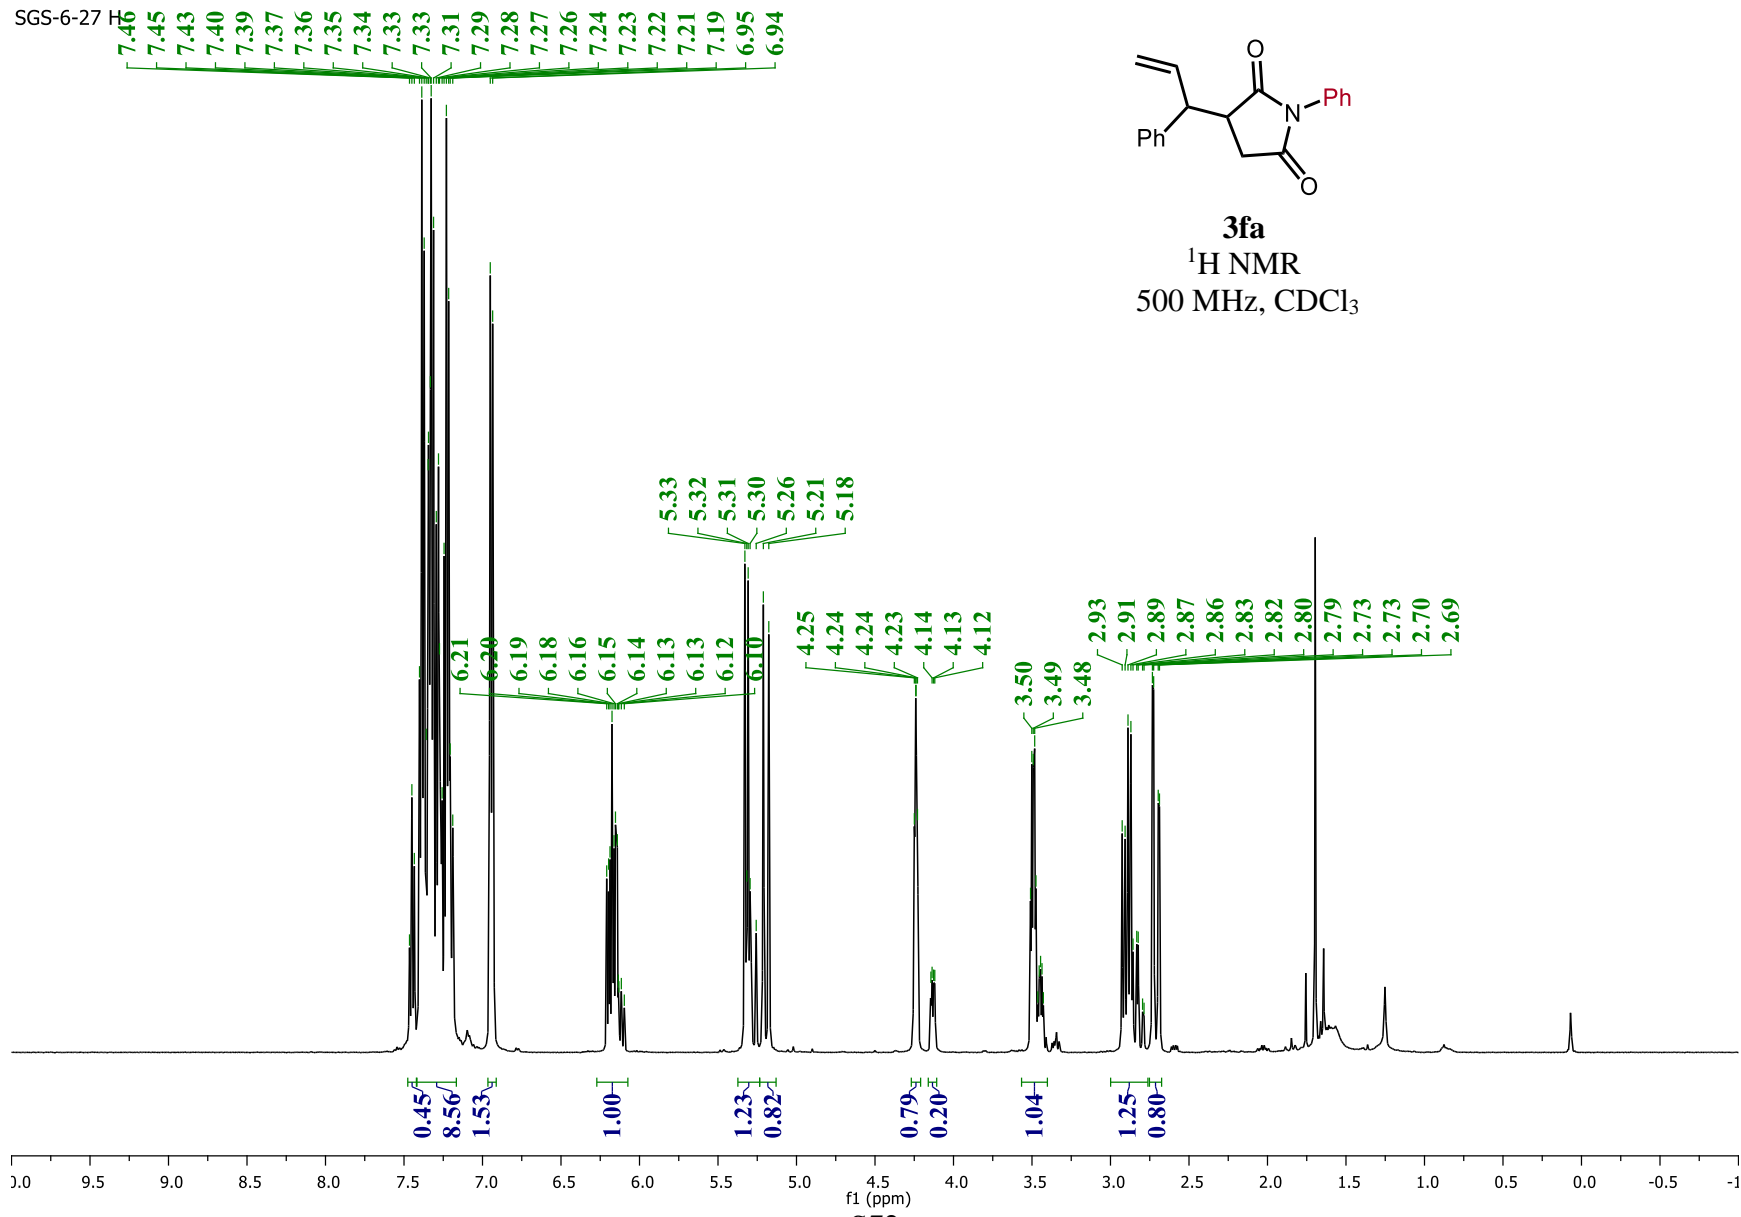

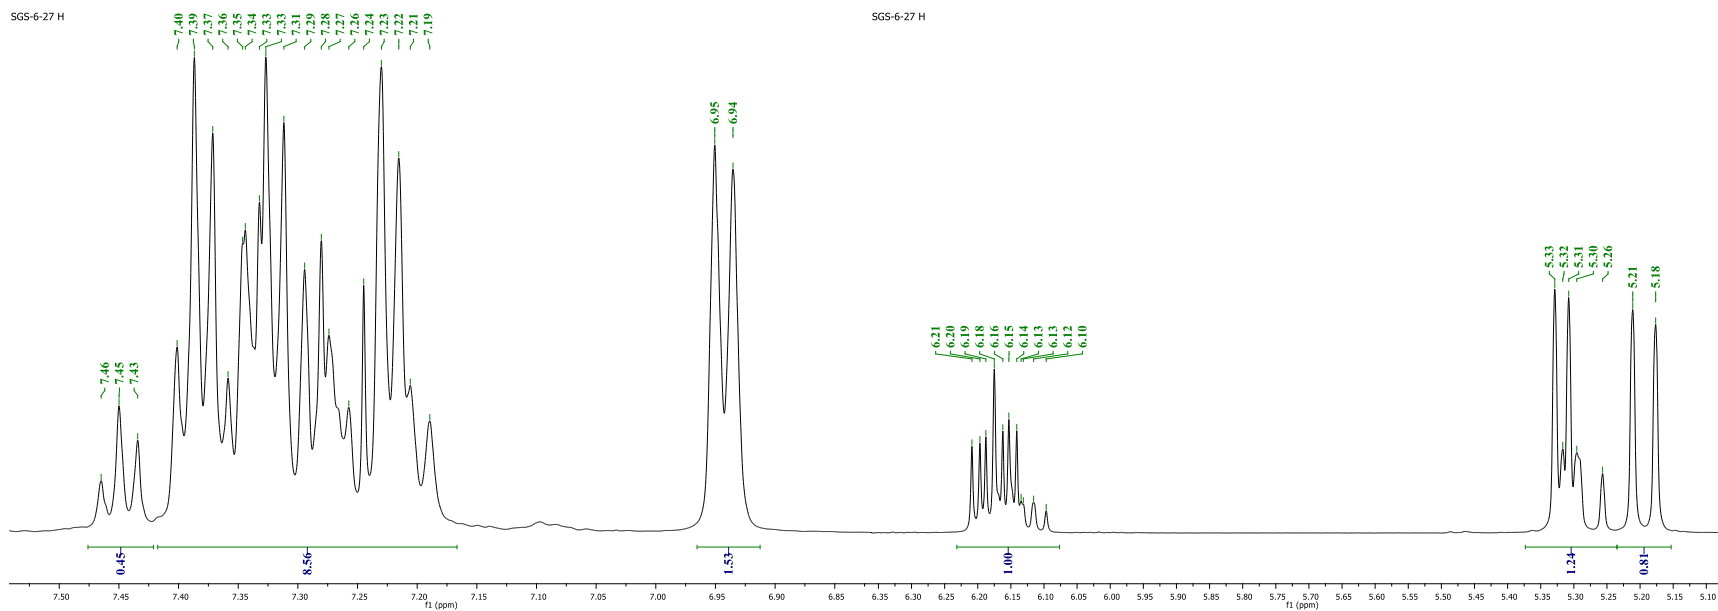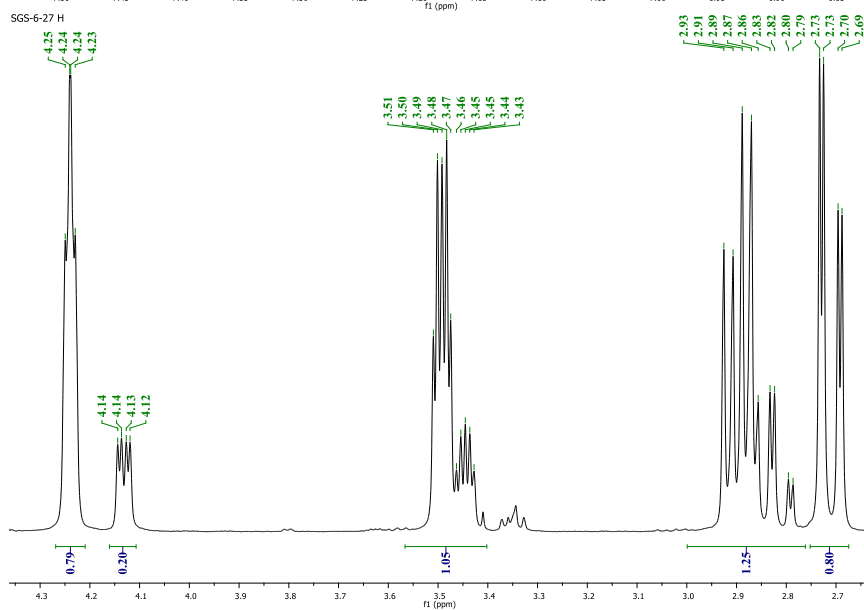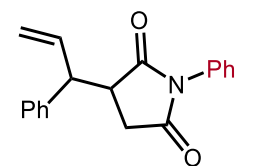

**3fa**  
 $^1\text{H}$  NMR  
 500 MHz,  $\text{CDCl}_3$

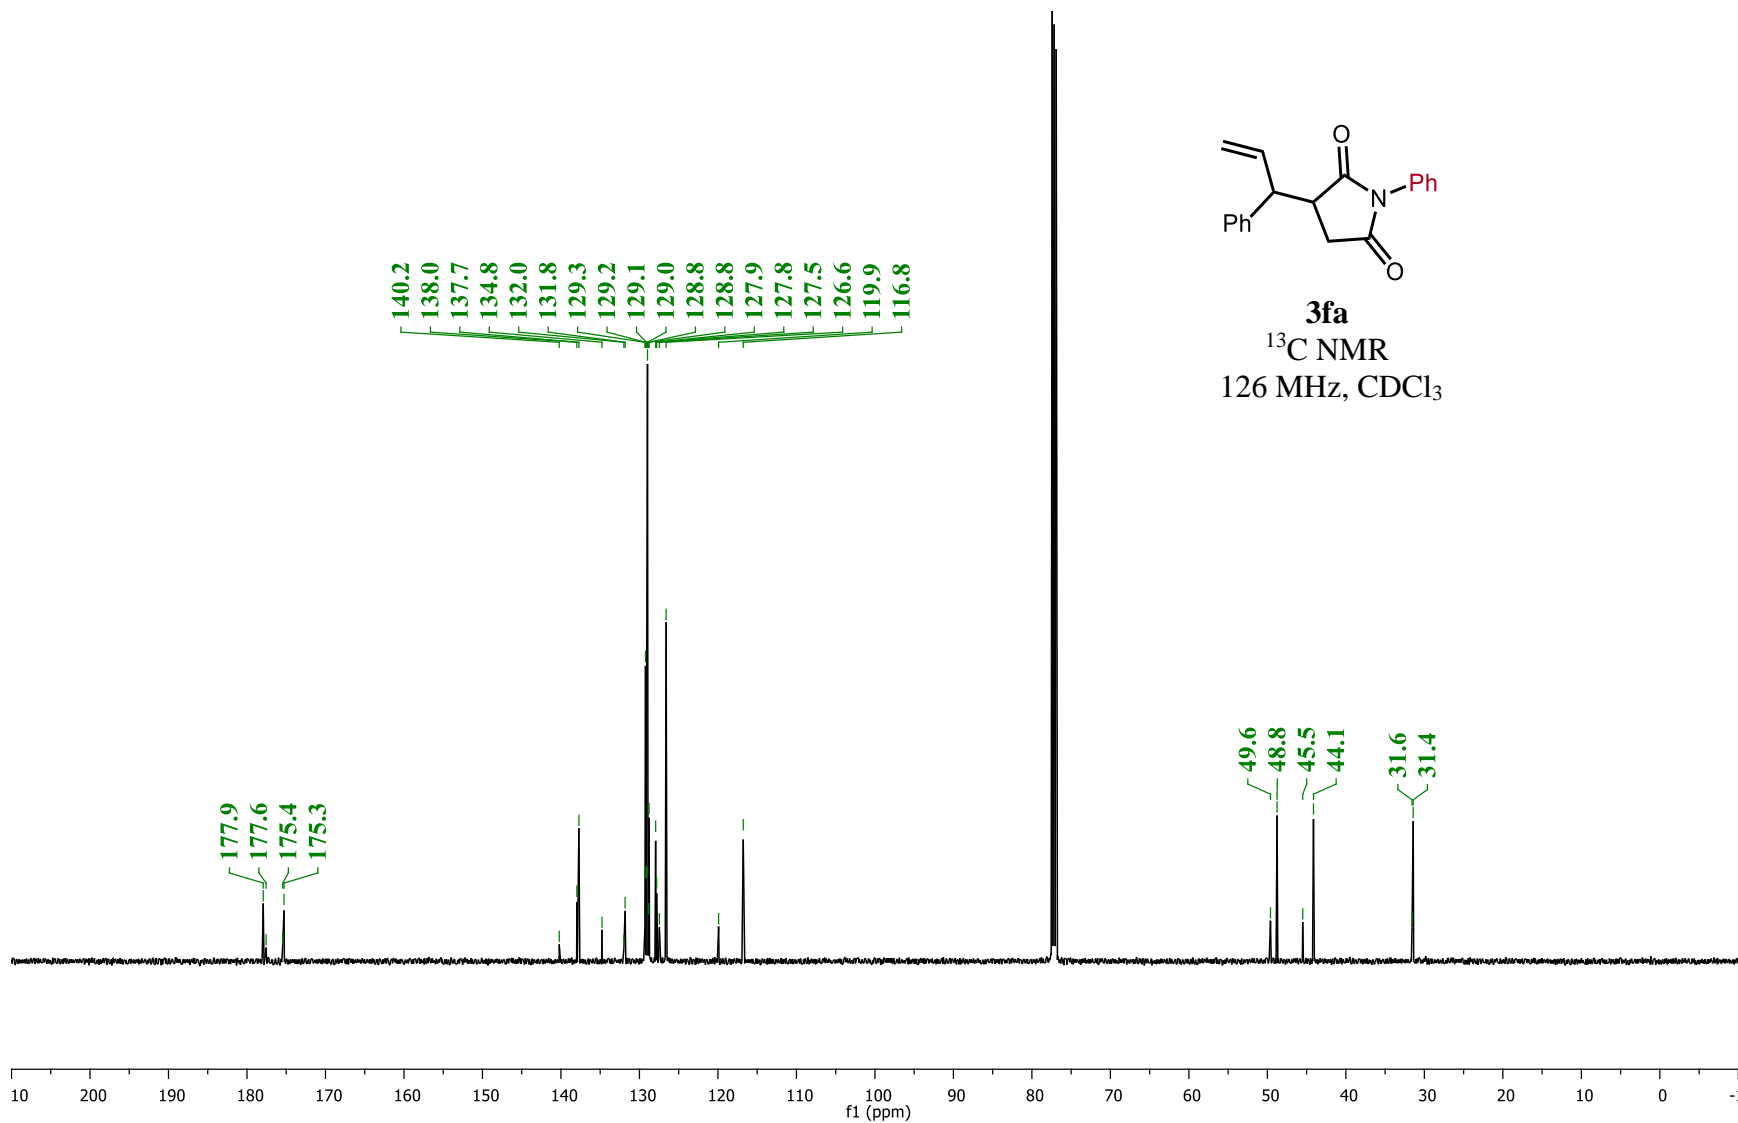

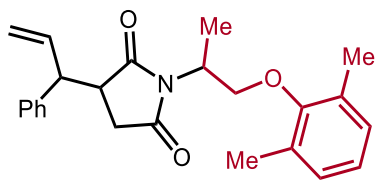

**3ga**

<sup>1</sup>H NMR  
500 MHz, CDCl<sub>3</sub>

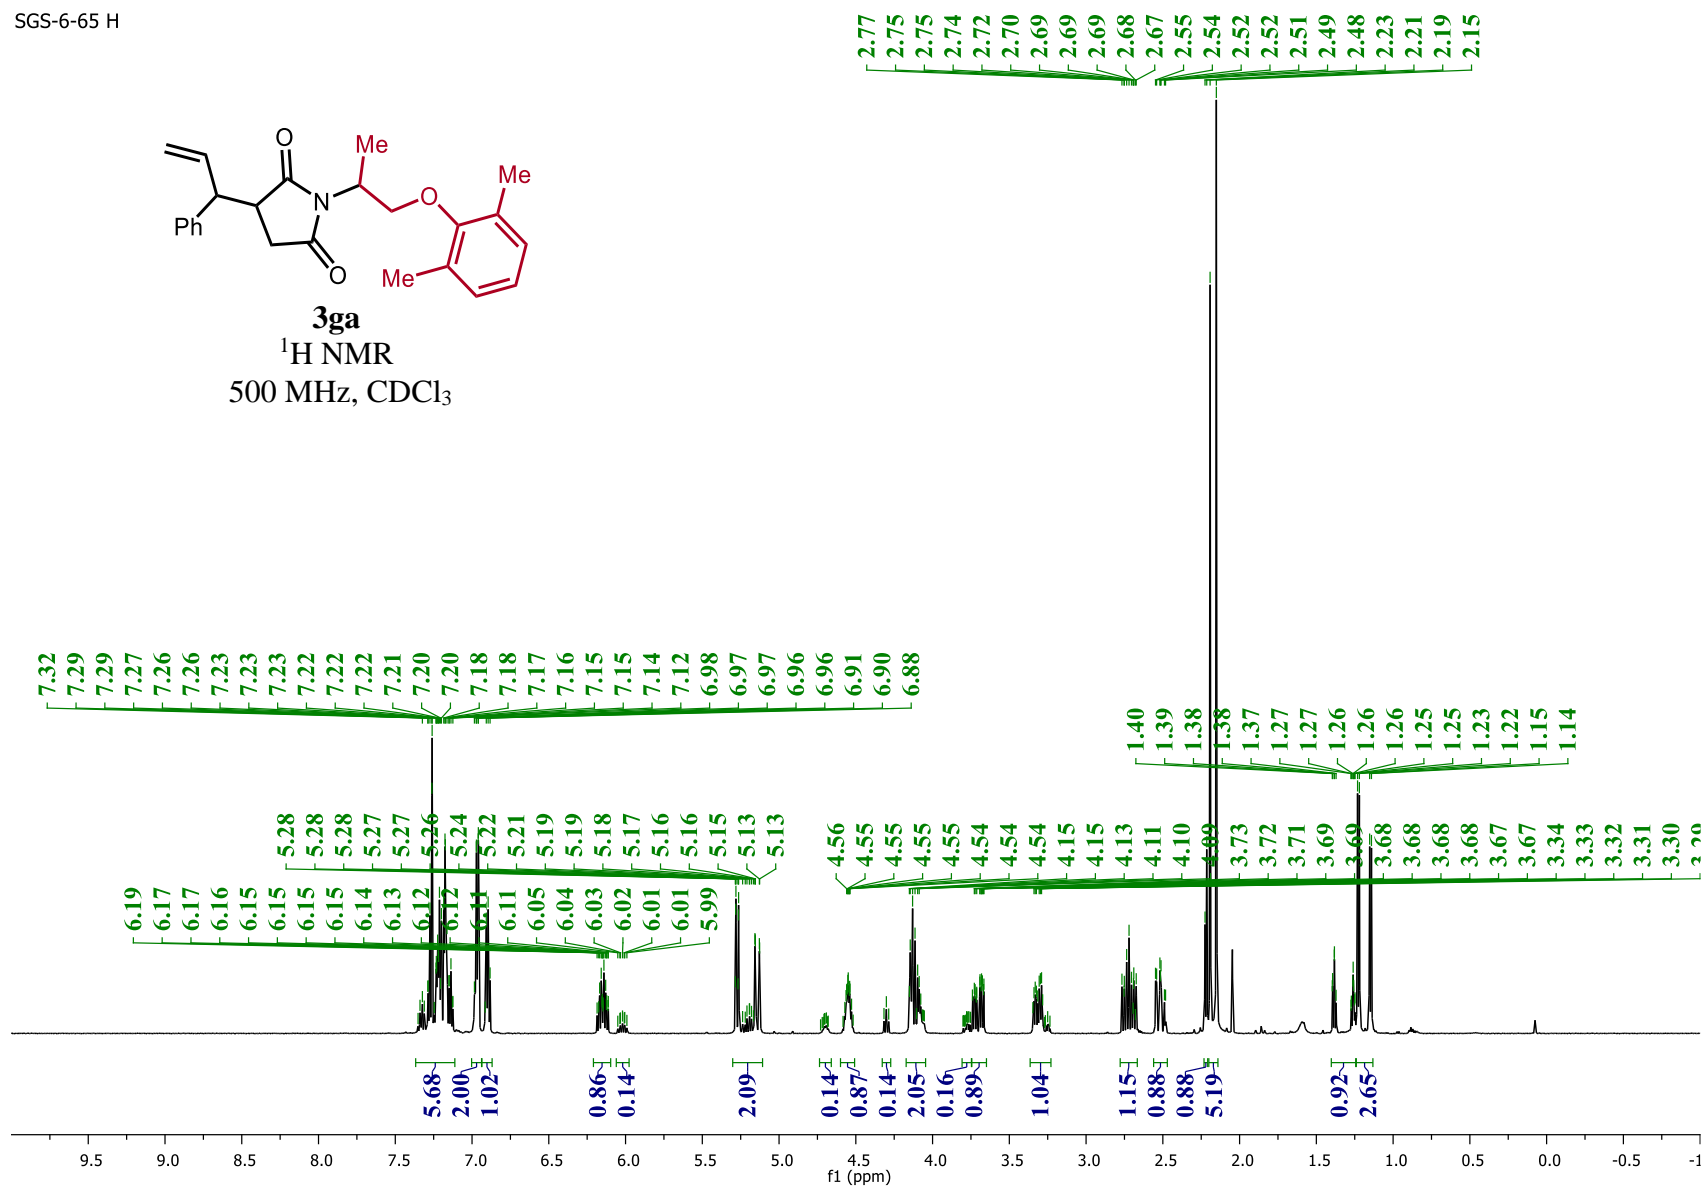





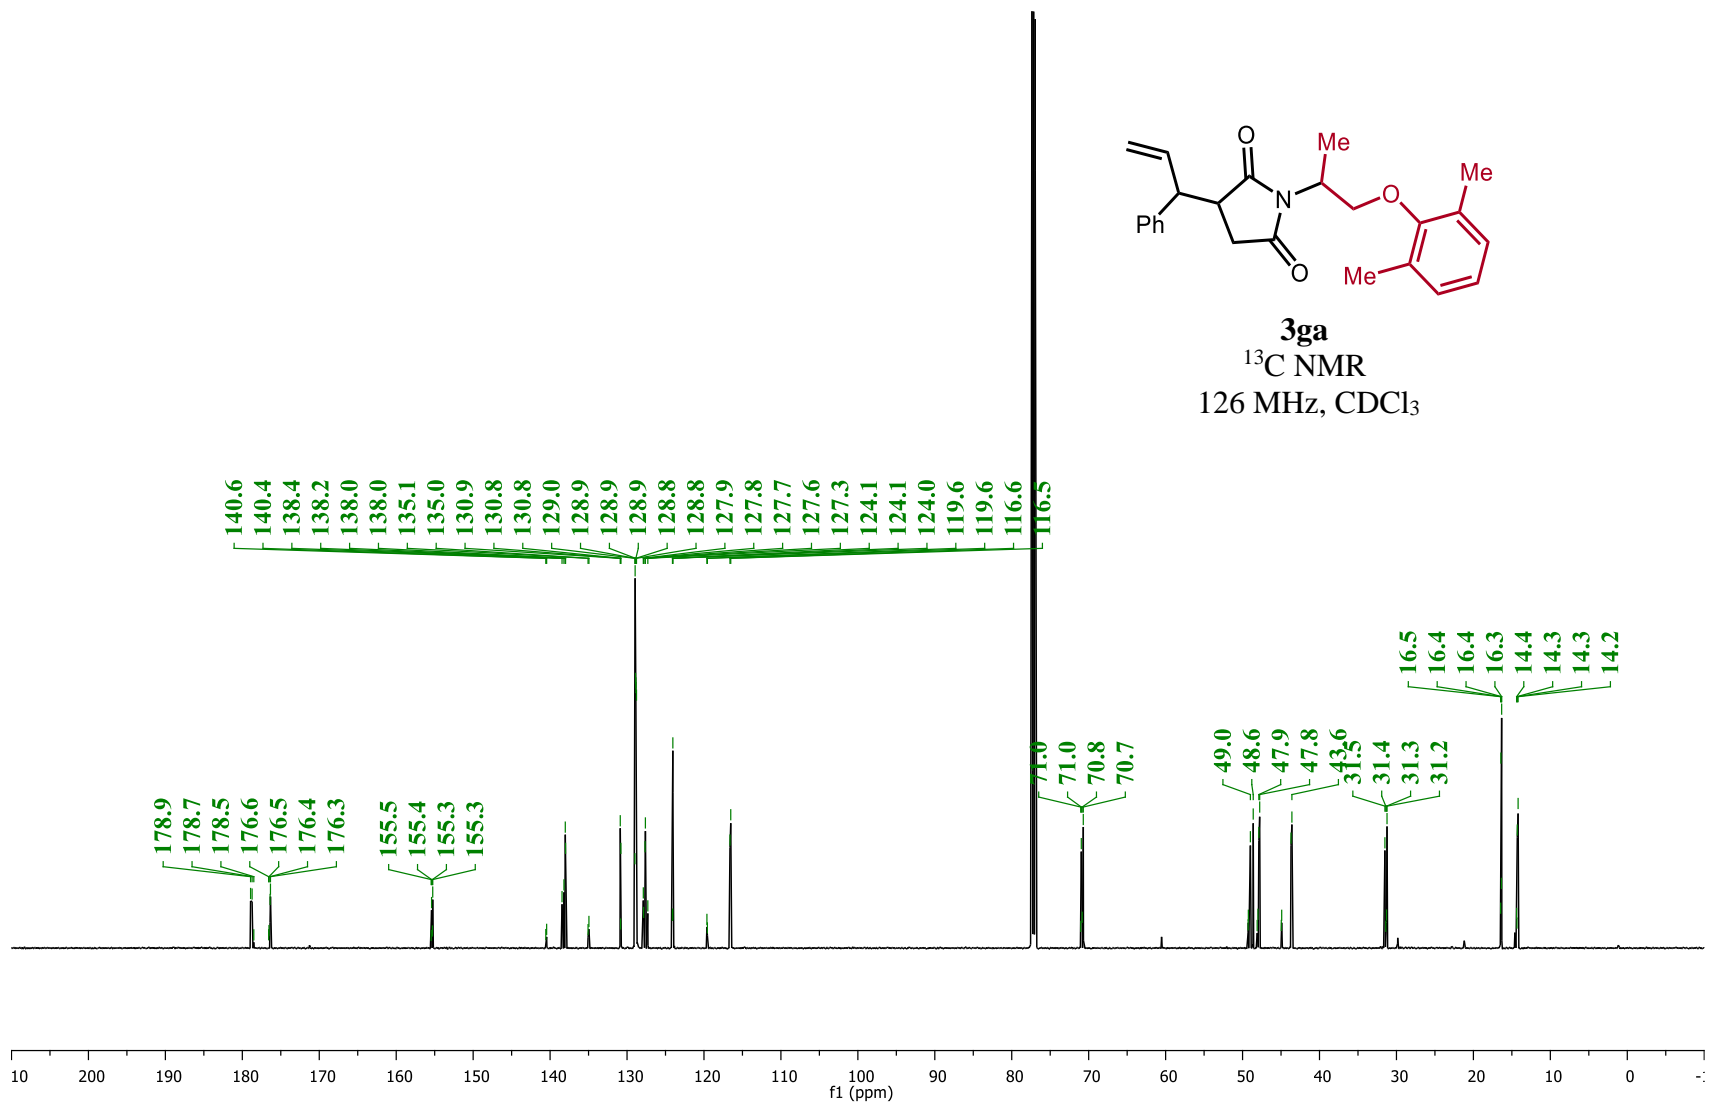

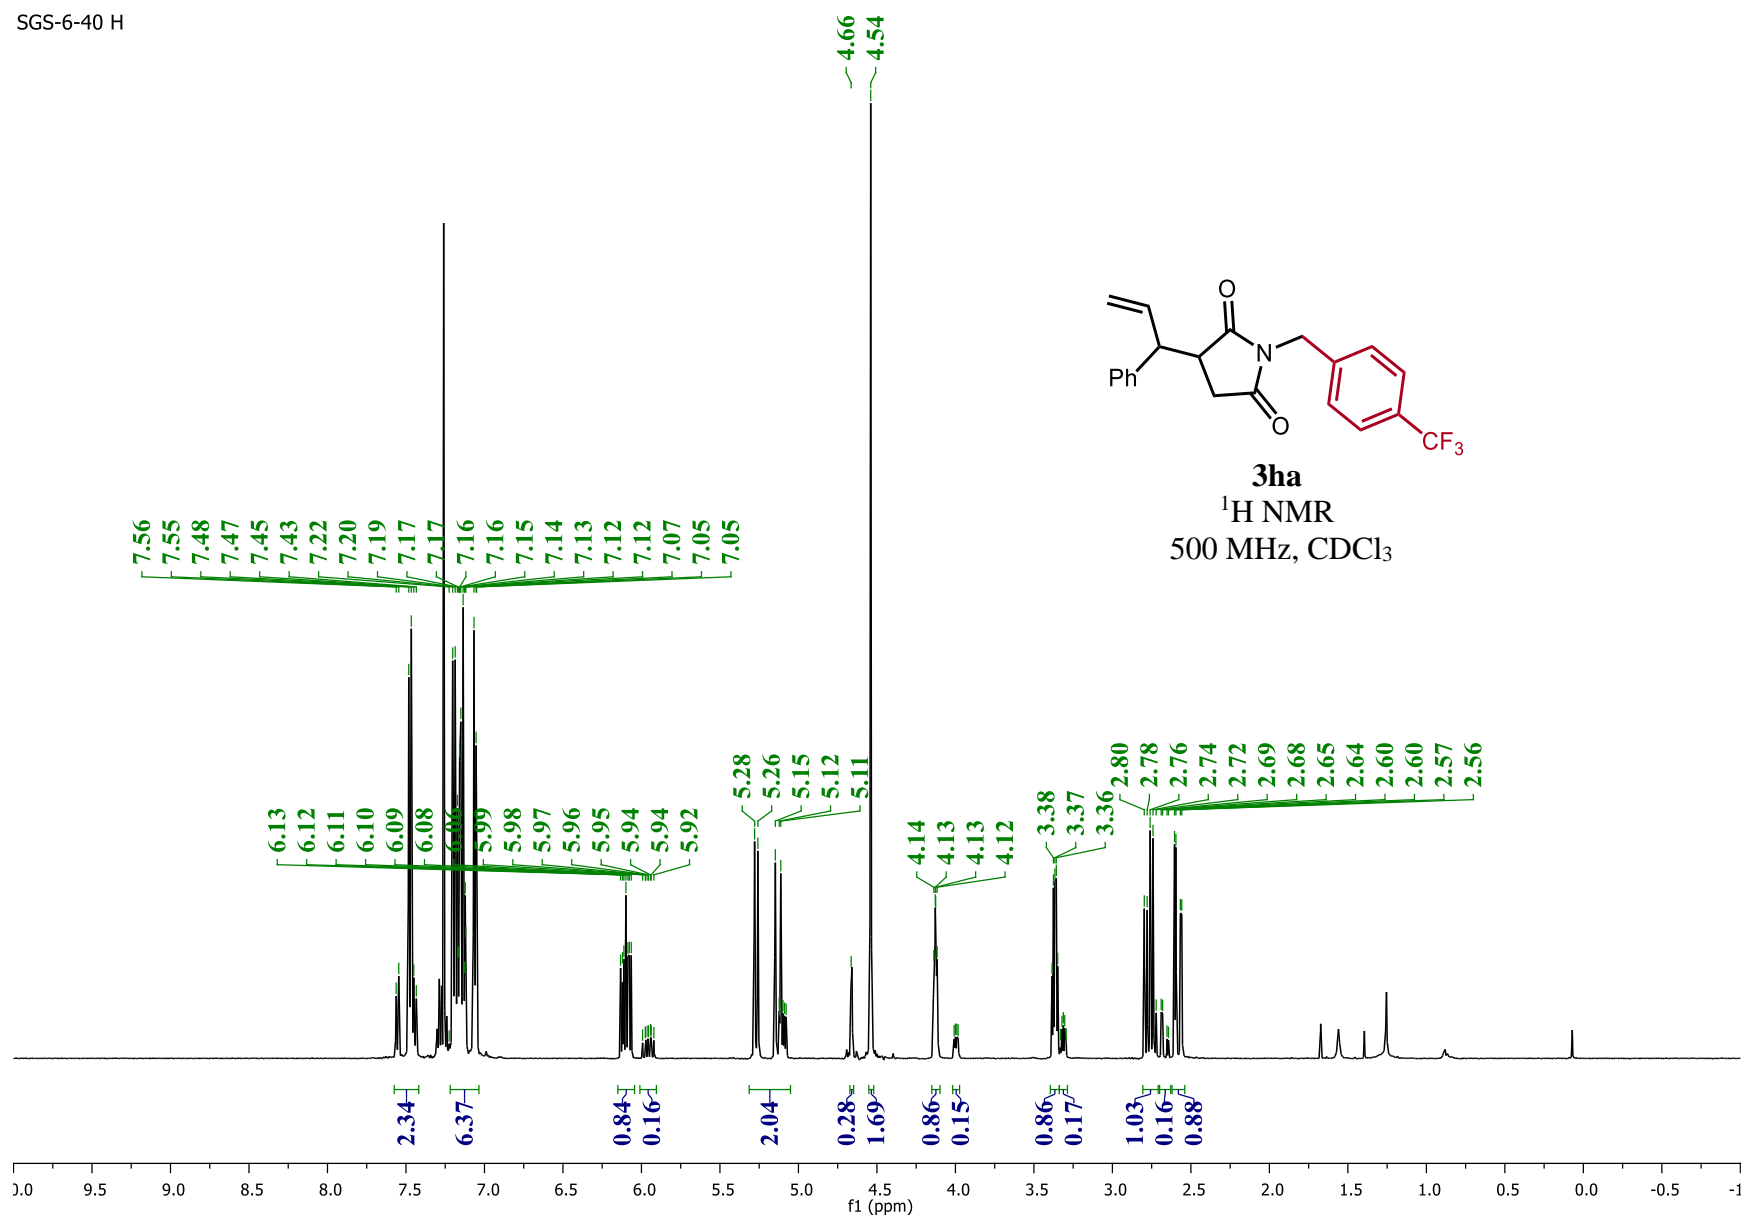

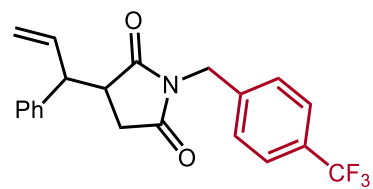

**3ha**  
<sup>13</sup>C NMR  
 151 MHz, CDCl<sub>3</sub>

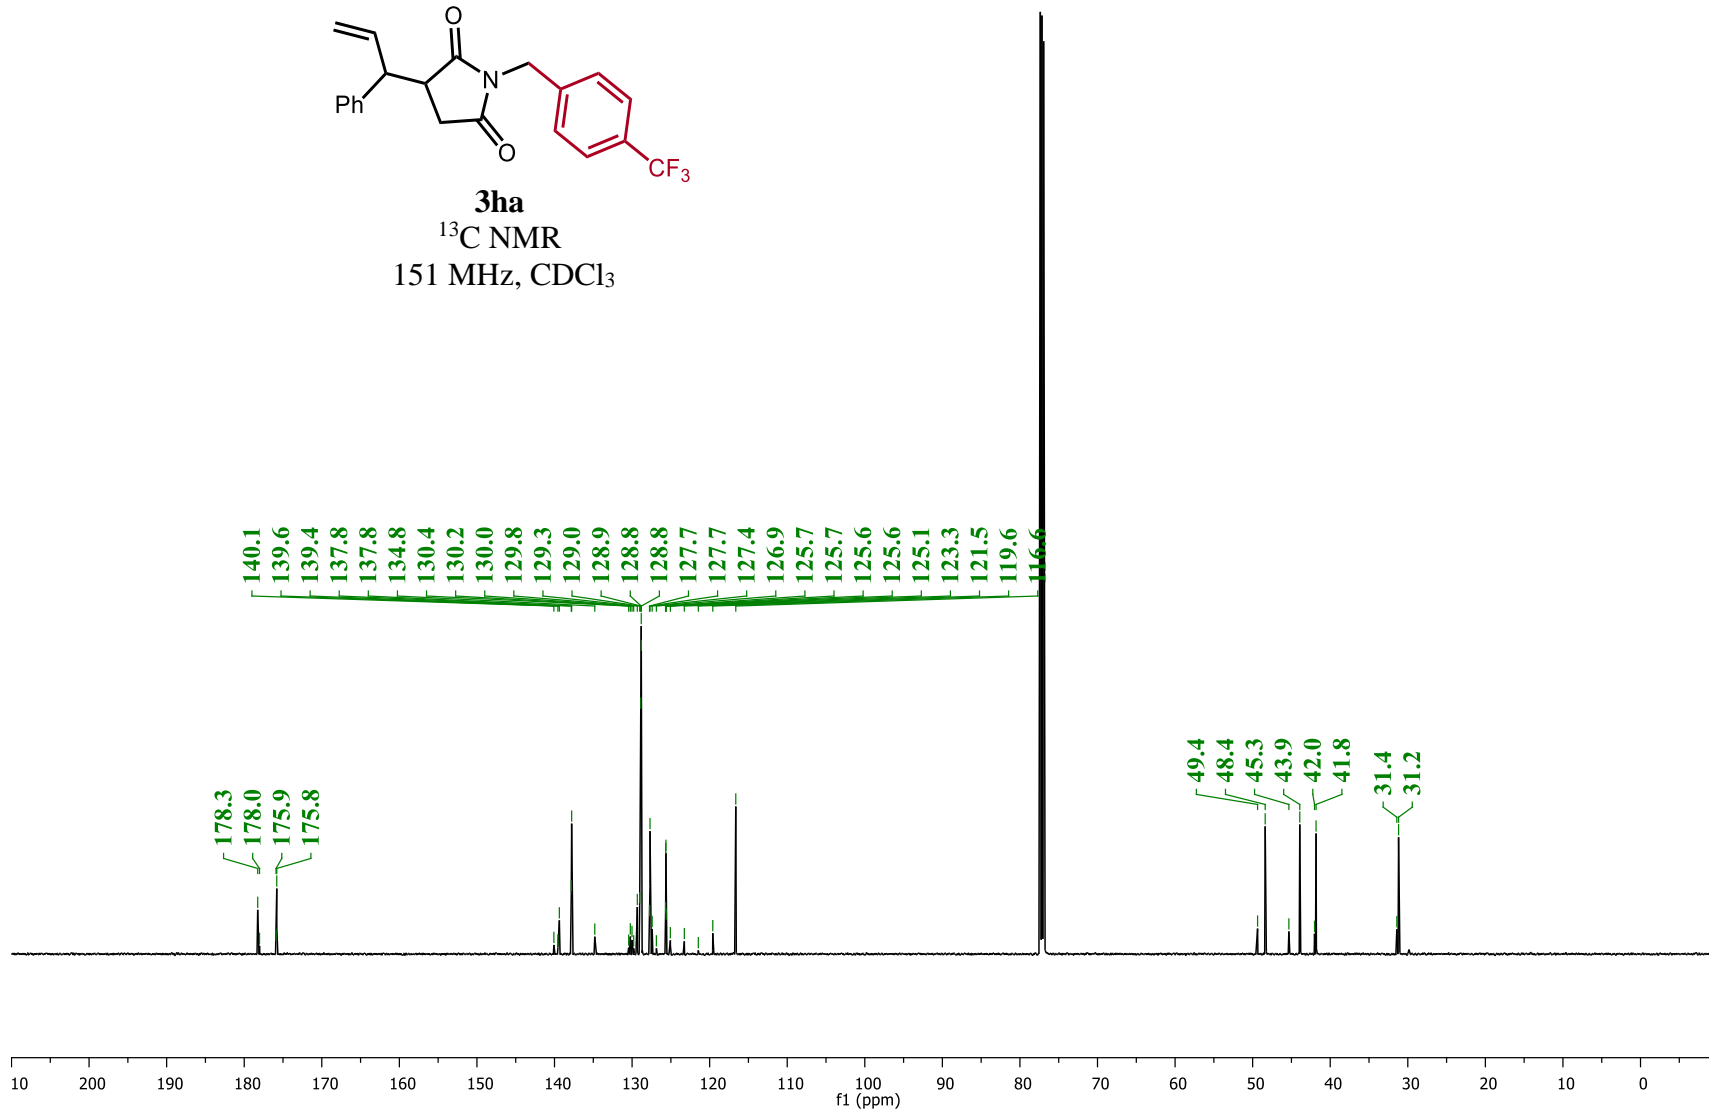

SGS-6-40 F

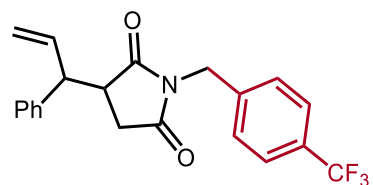

**3ha**  
<sup>19</sup>F NMR  
471 MHz, CDCl<sub>3</sub>

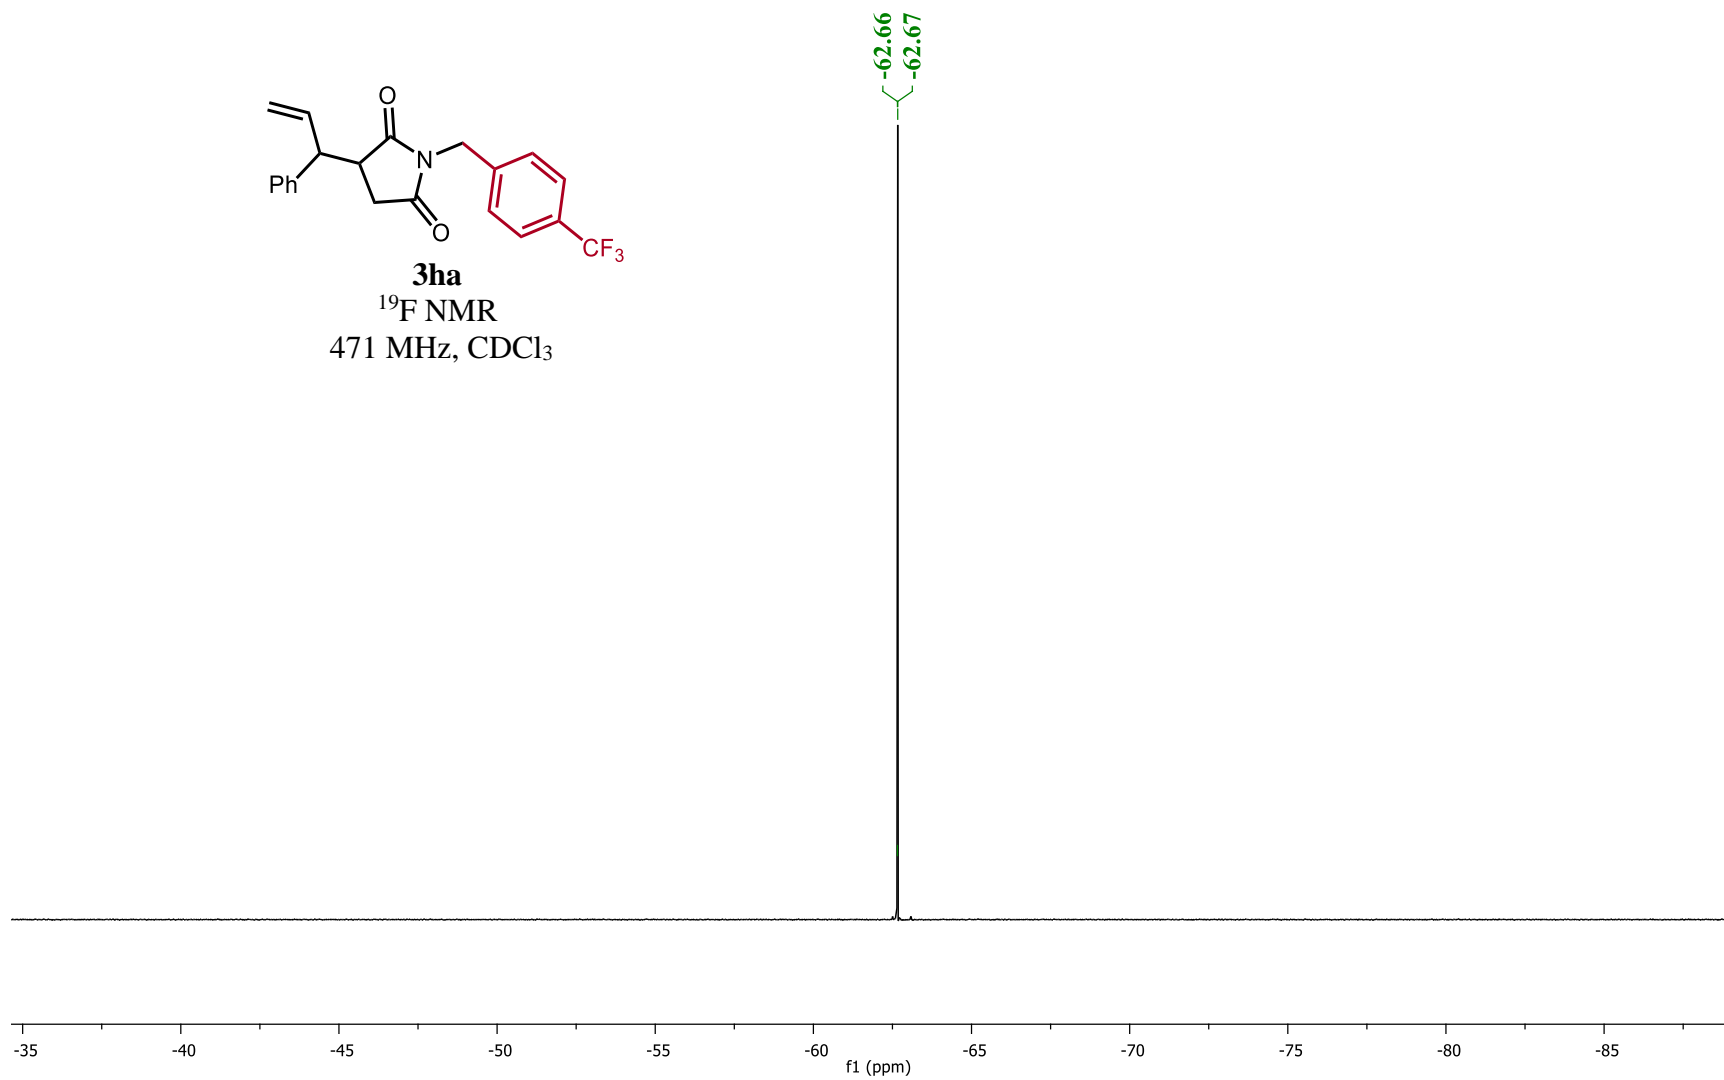

S80

SGS-6-59 H

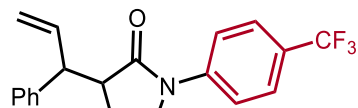

**3ja**

<sup>1</sup>H NMR  
500 MHz, CDCl<sub>3</sub>

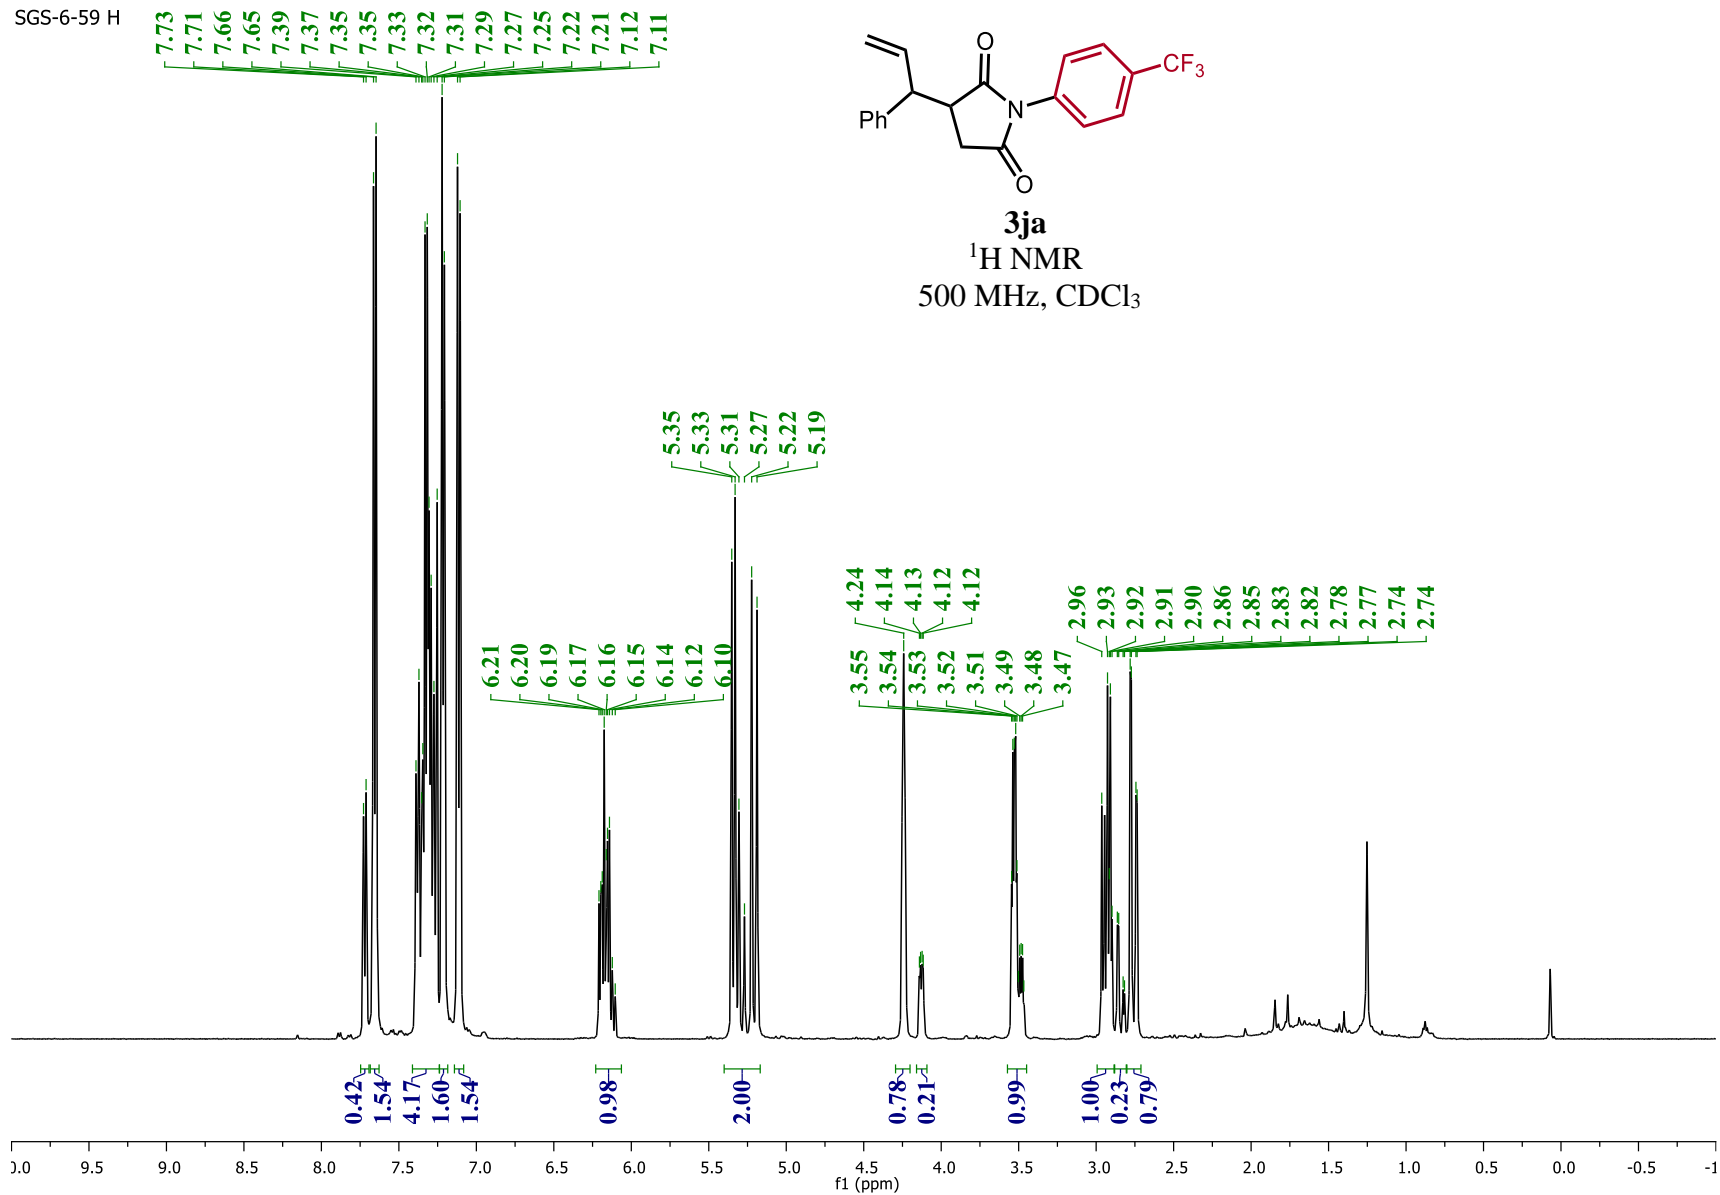

S81

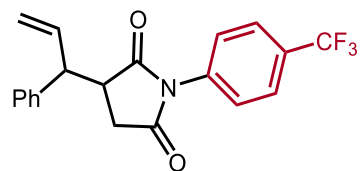

**3ja**  
<sup>13</sup>C NMR  
 126 MHz, CDCl<sub>3</sub>

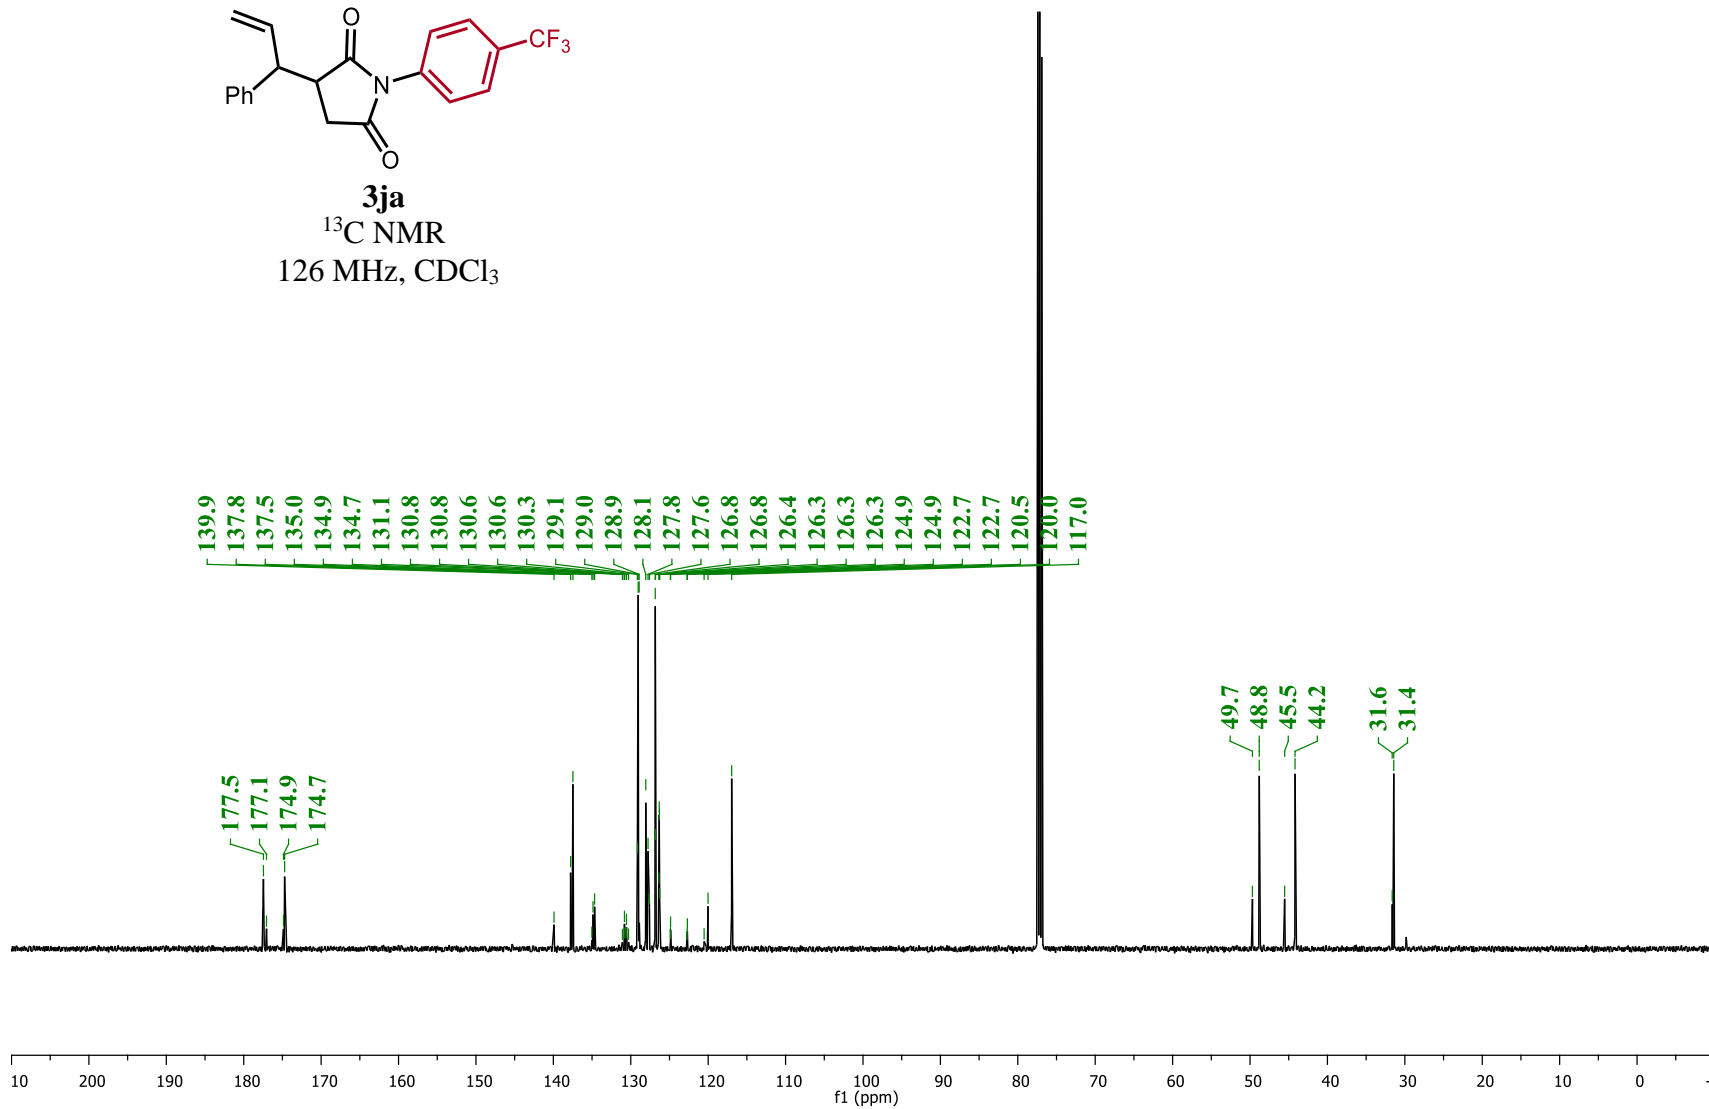

SGS-6-59 F

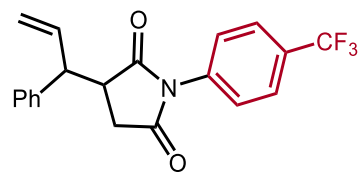

**3ja**

<sup>19</sup>F NMR  
471 MHz, CDCl<sub>3</sub>

-62.75  
-62.78

SGS-6-59 F

-62.75  
-62.78

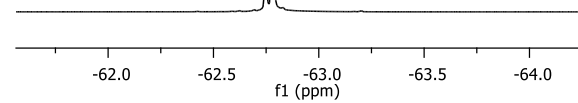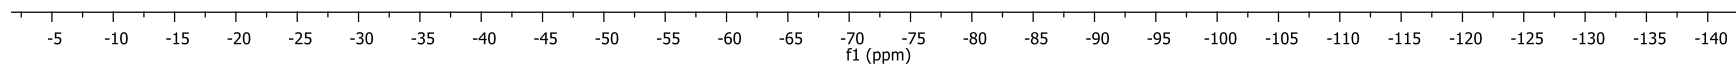

S83

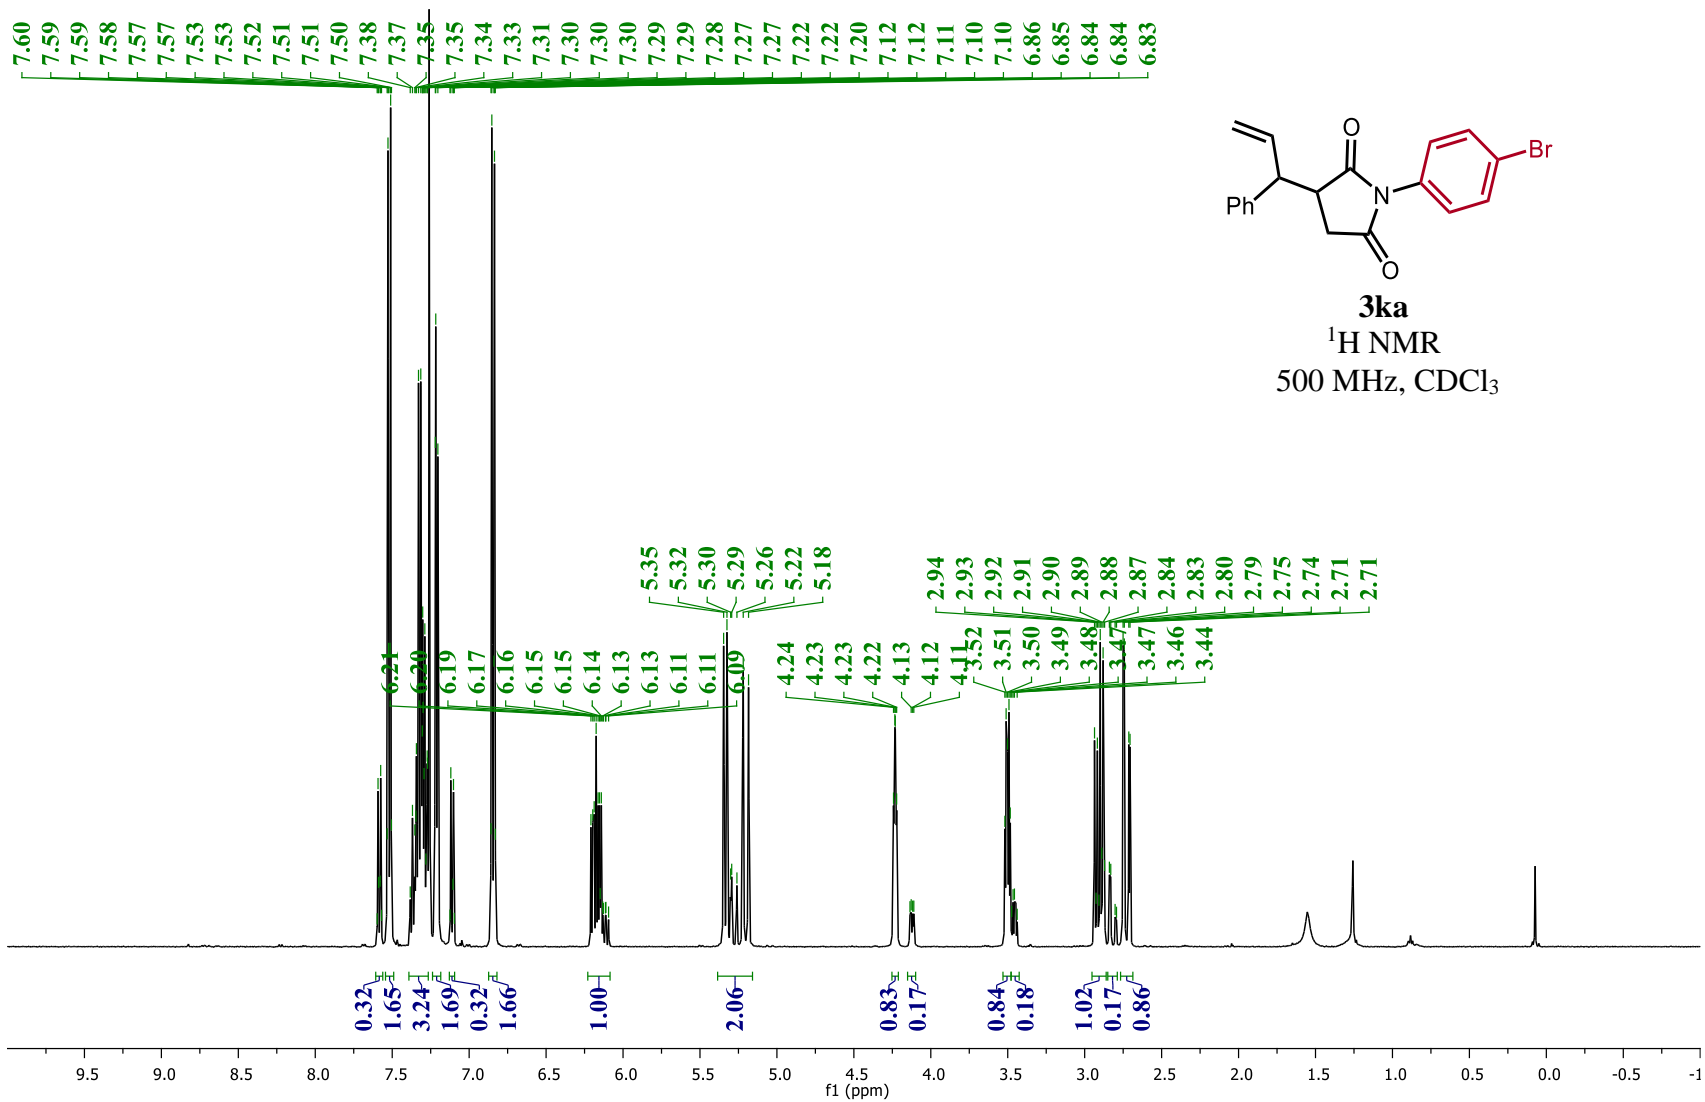



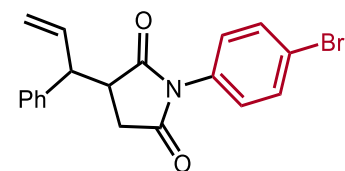

**3ka**  
<sup>13</sup>C NMR  
126 MHz, CDCl<sub>3</sub>

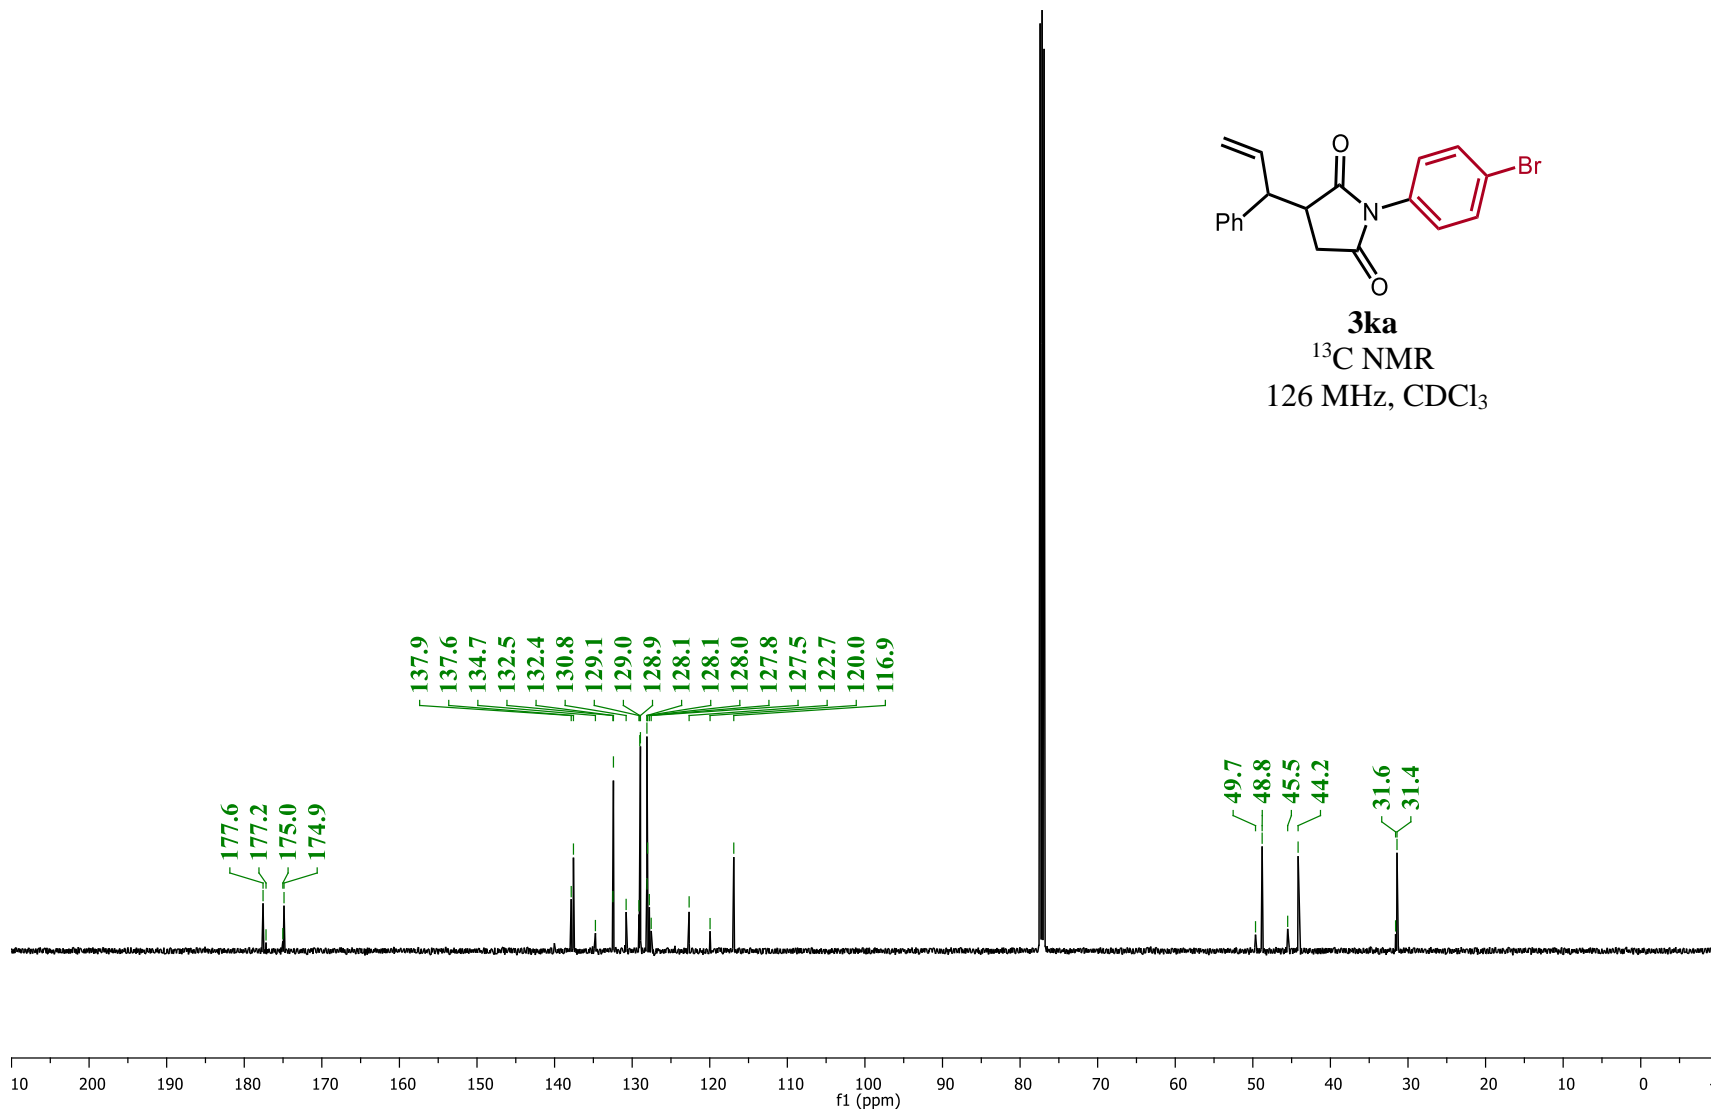

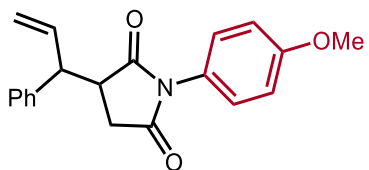

**3la**  
<sup>1</sup>H NMR  
 500 MHz, CDCl<sub>3</sub>

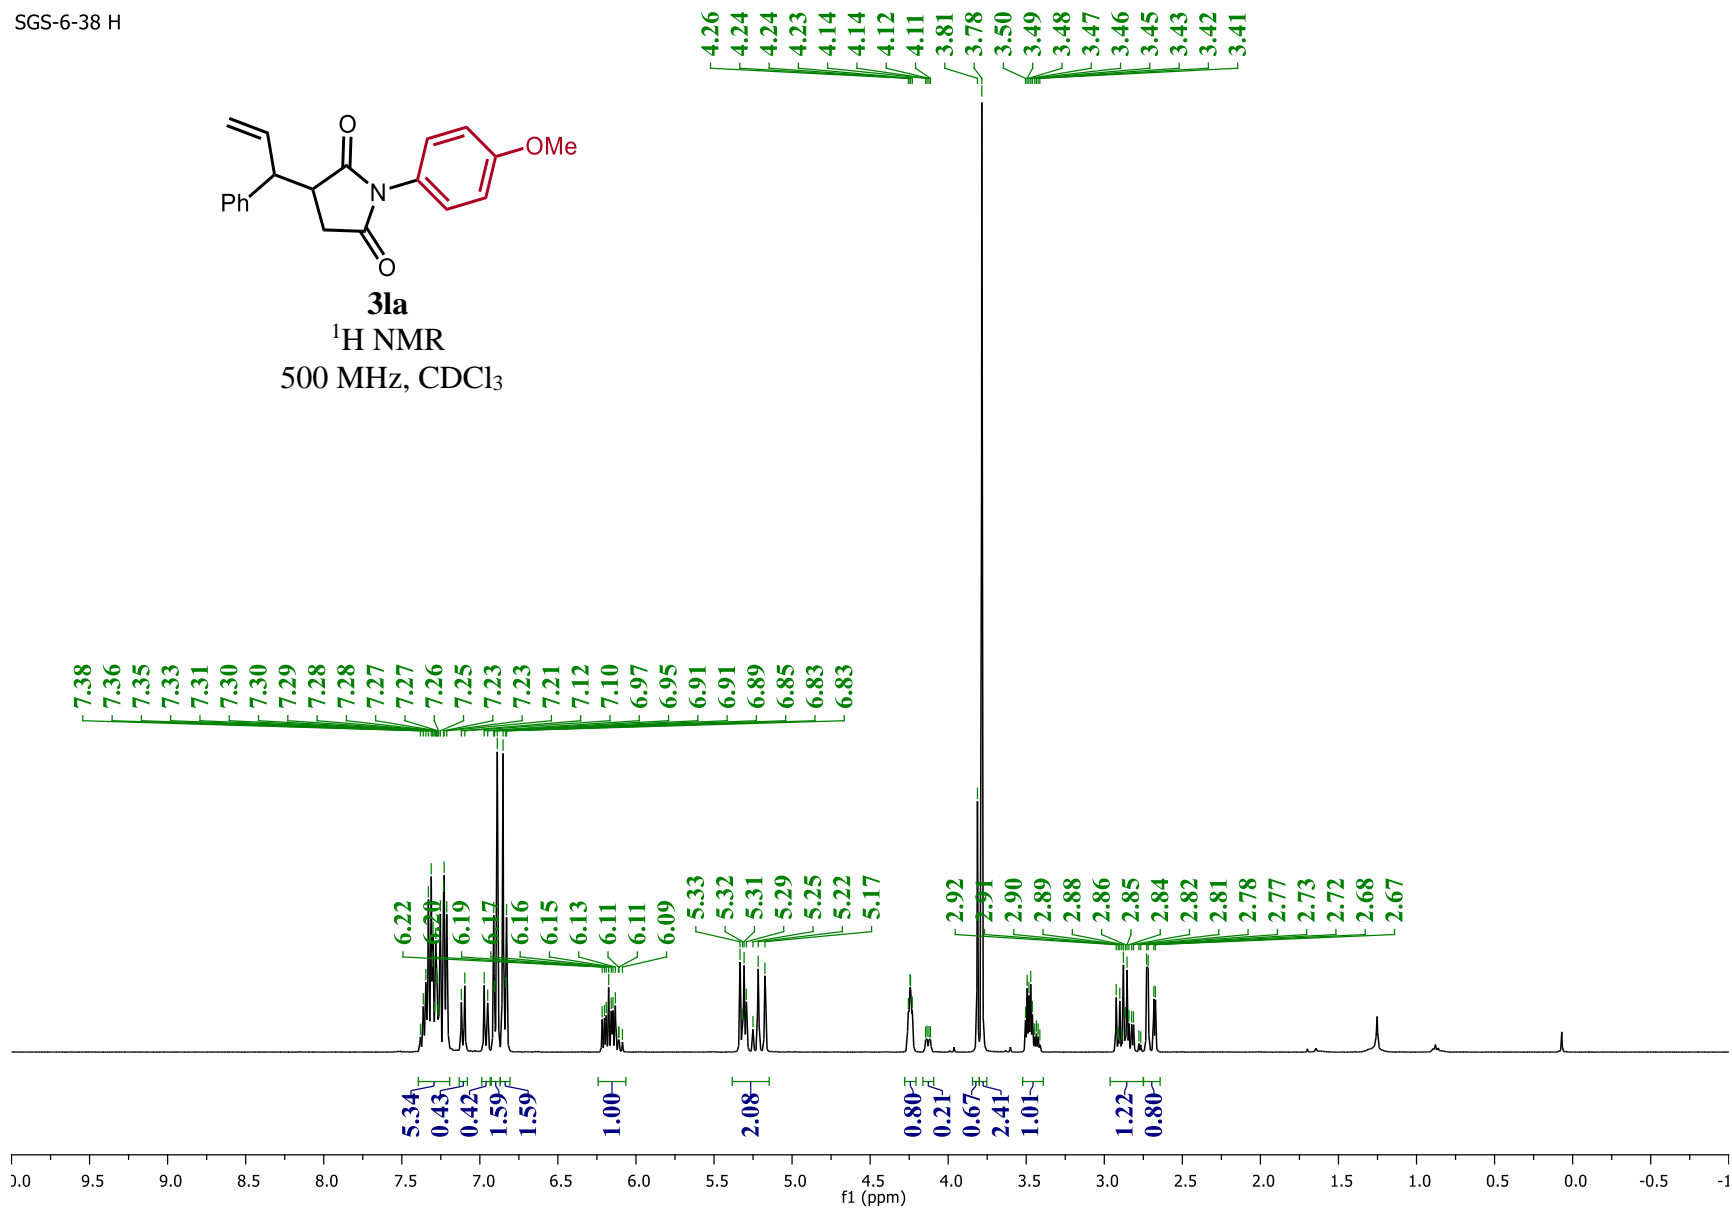

SGS-6-38 H

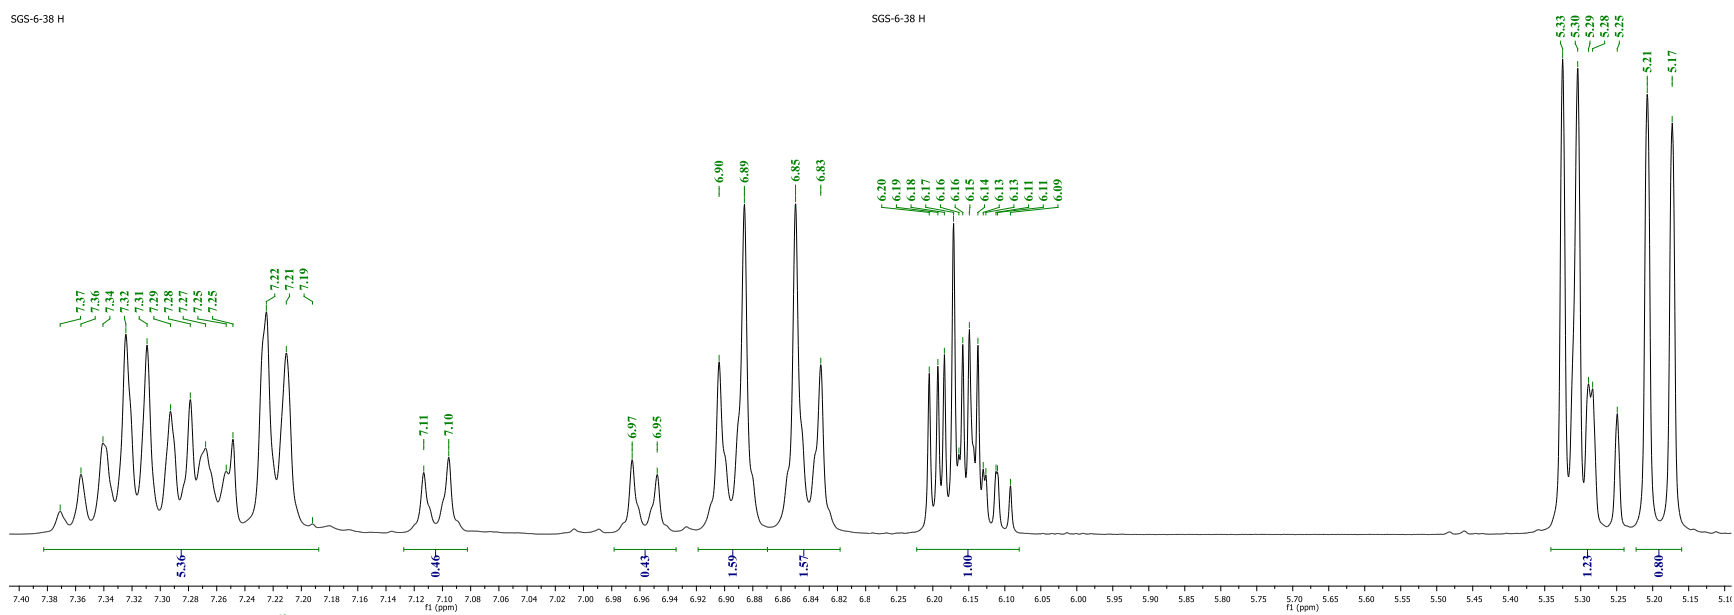

SGS-6-38 H

SGS-6-38 H

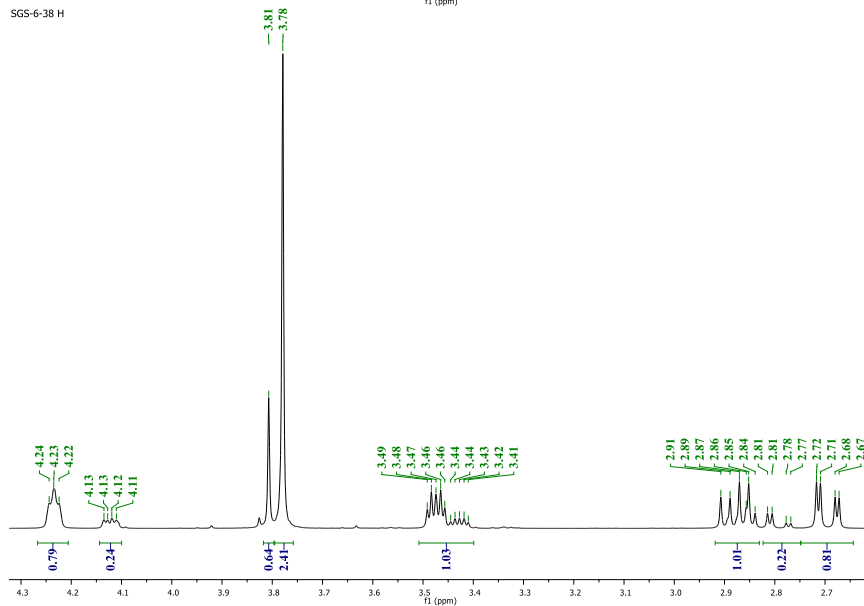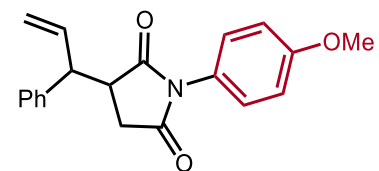**3la**

<sup>1</sup>H NMR  
500 MHz, CDCl<sub>3</sub>

SGS-6-38 C

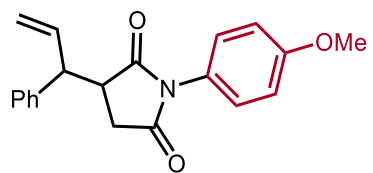

**3a**

<sup>13</sup>C NMR  
126 MHz, CDCl<sub>3</sub>

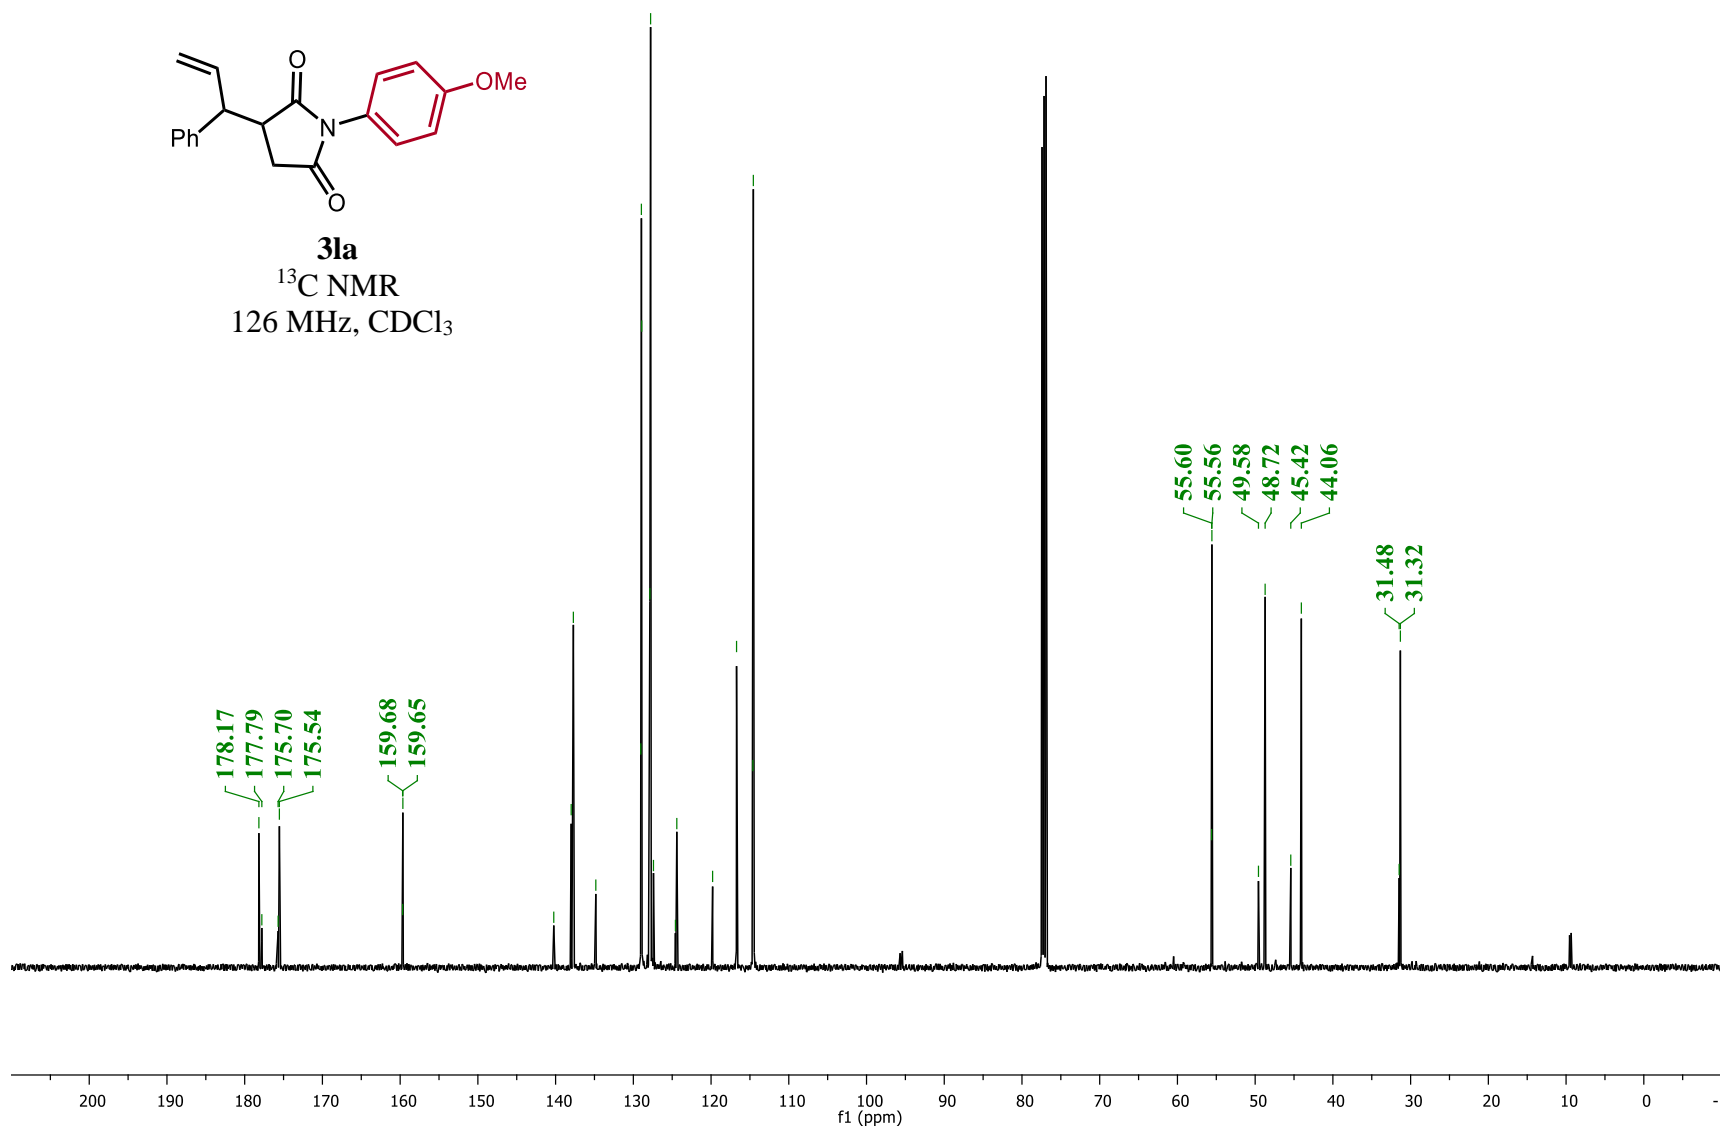

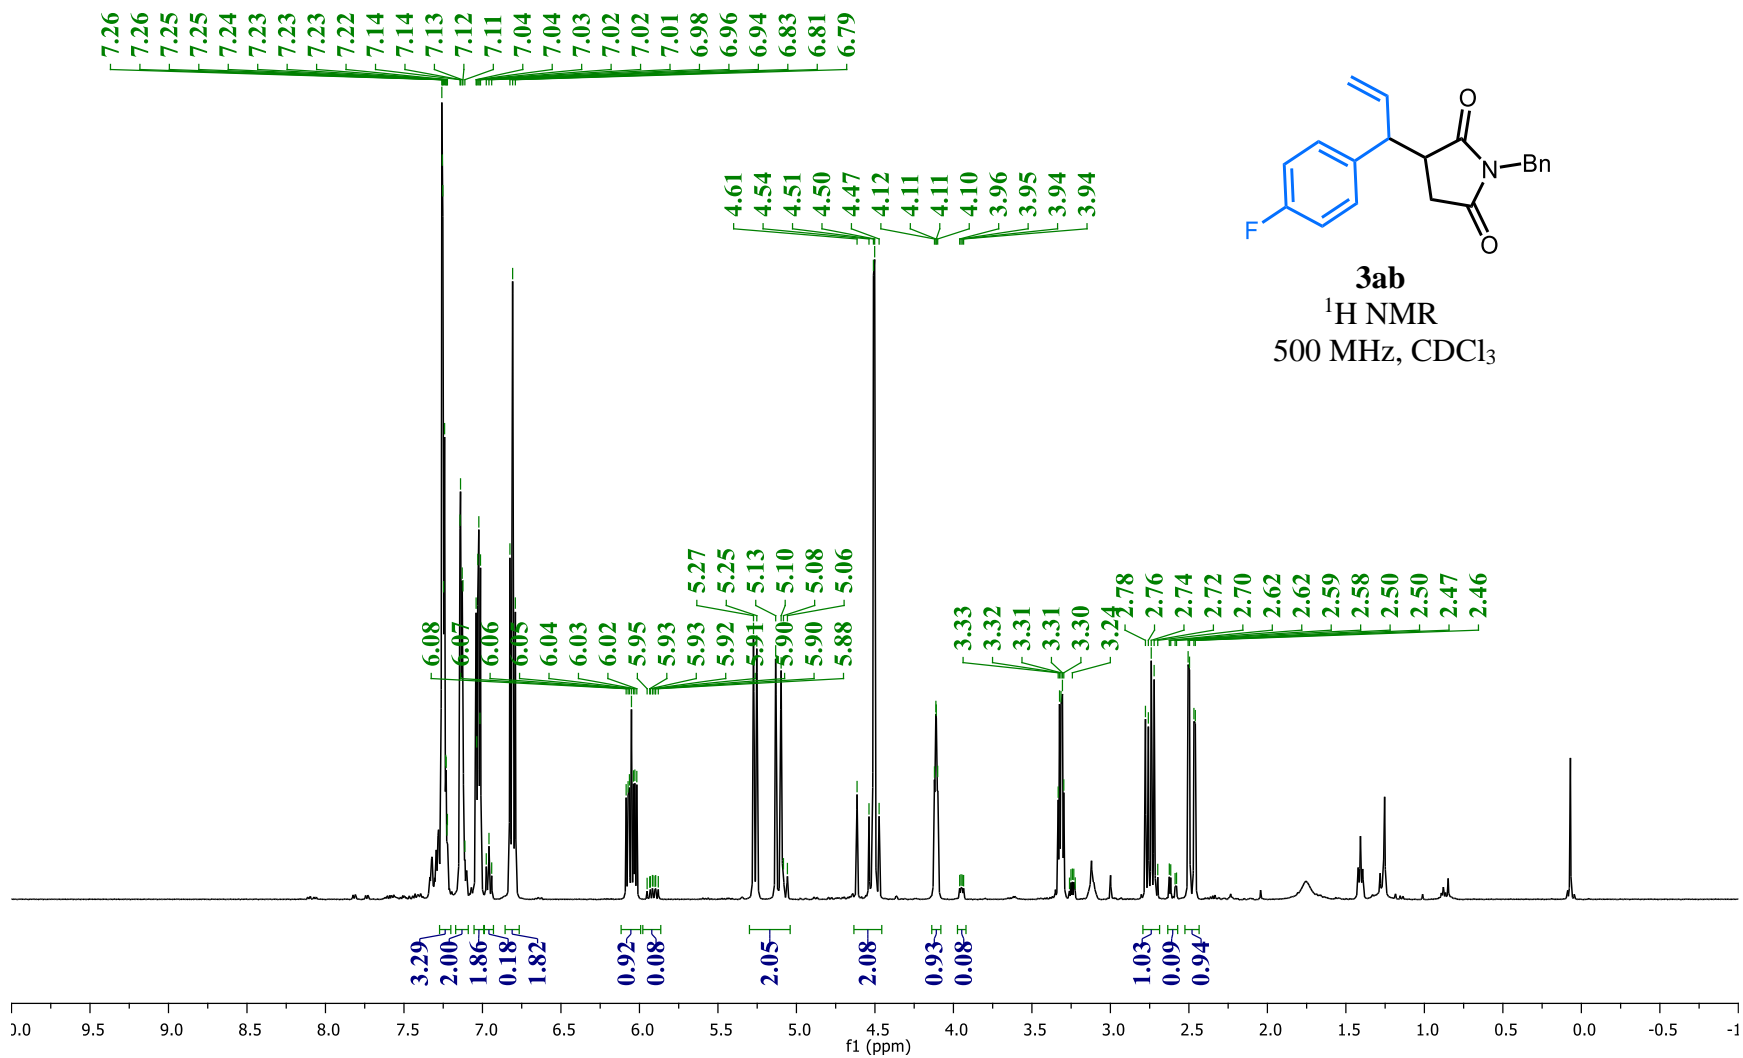

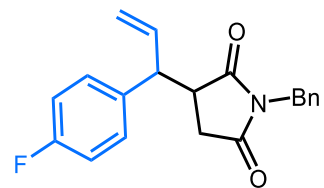

**3ab**  
<sup>13</sup>C NMR  
 126 MHz, CDCl<sub>3</sub>

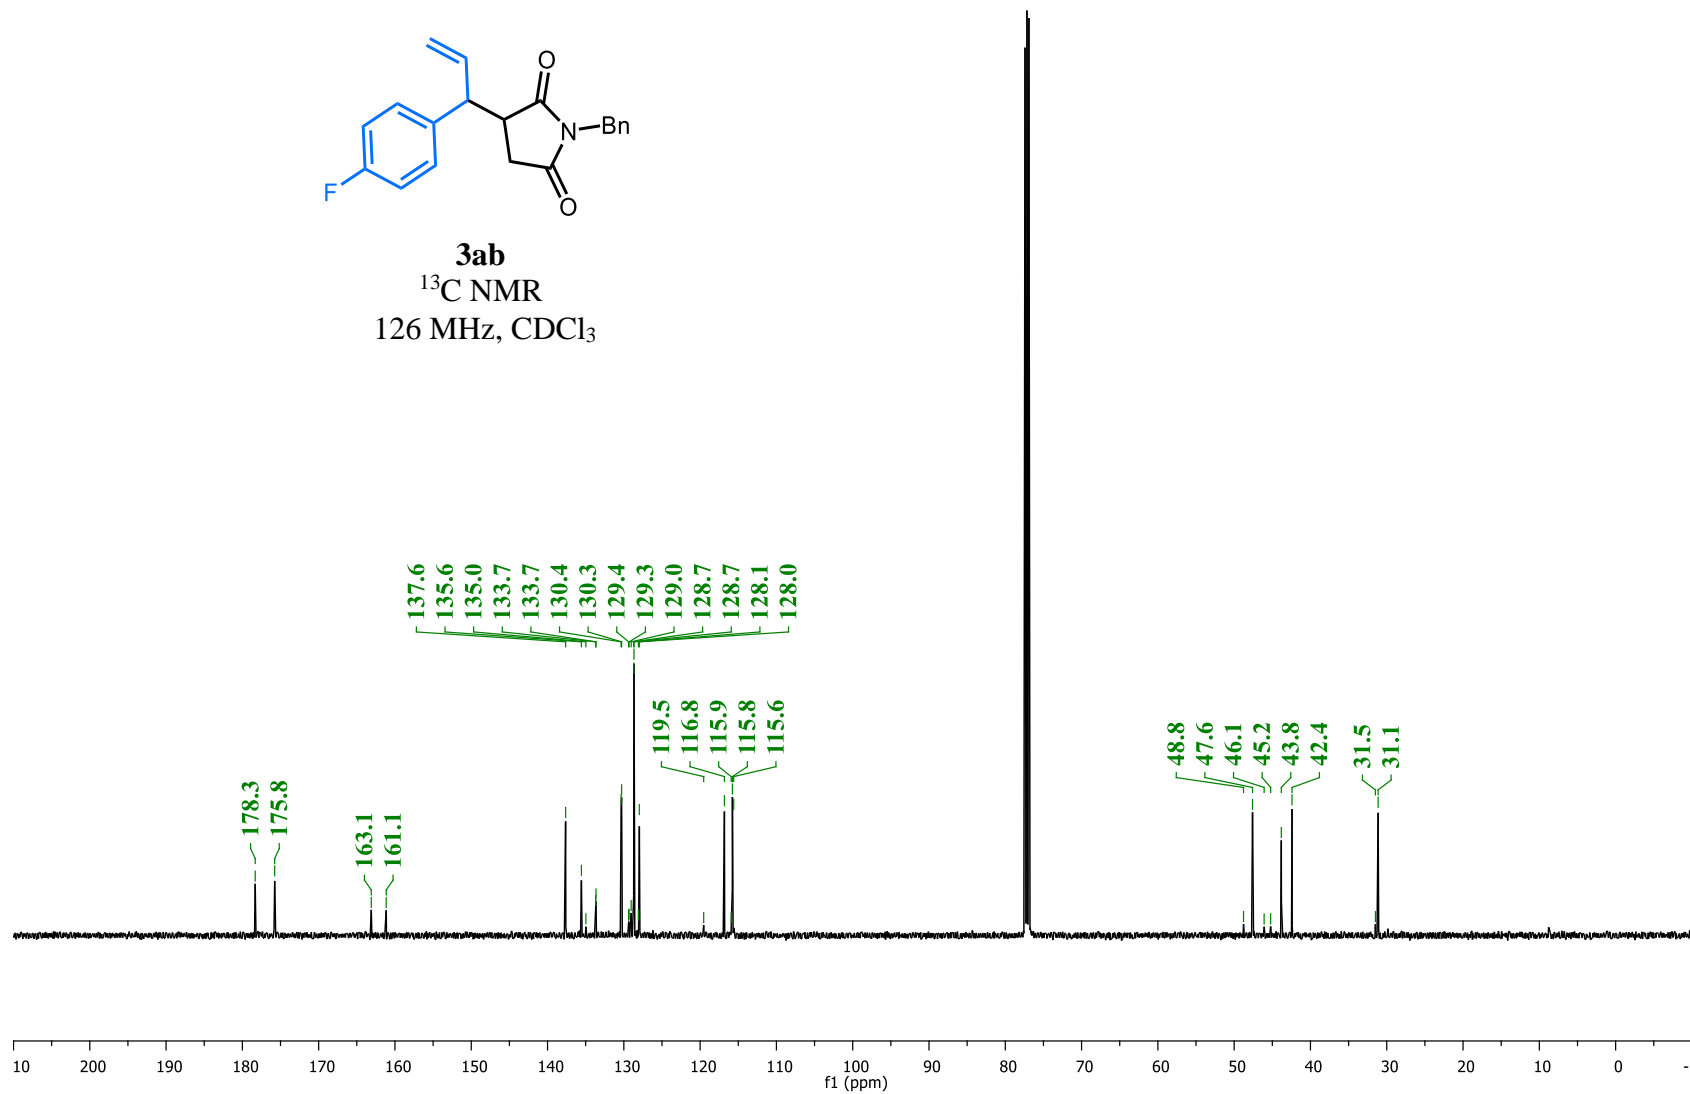

SGS-6-56 F

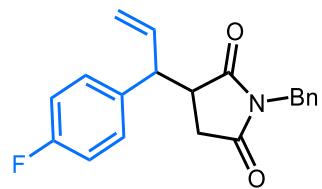

**3ab**  
<sup>19</sup>F NMR  
471 MHz, CDCl<sub>3</sub>

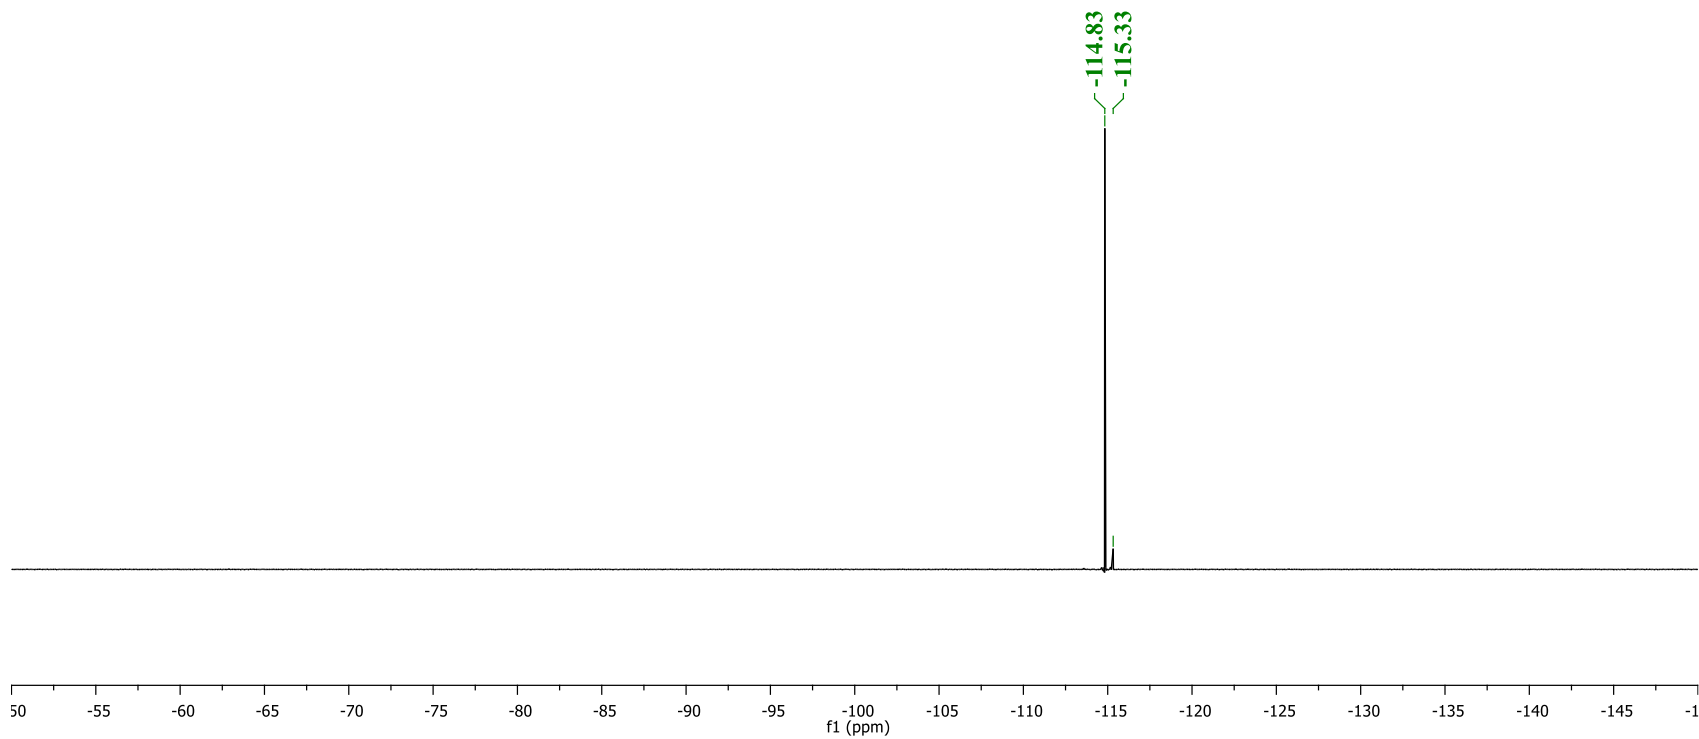

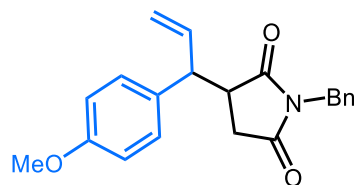

**3ac**  
 $^1\text{H}$  NMR  
500 MHz,  $\text{CDCl}_3$

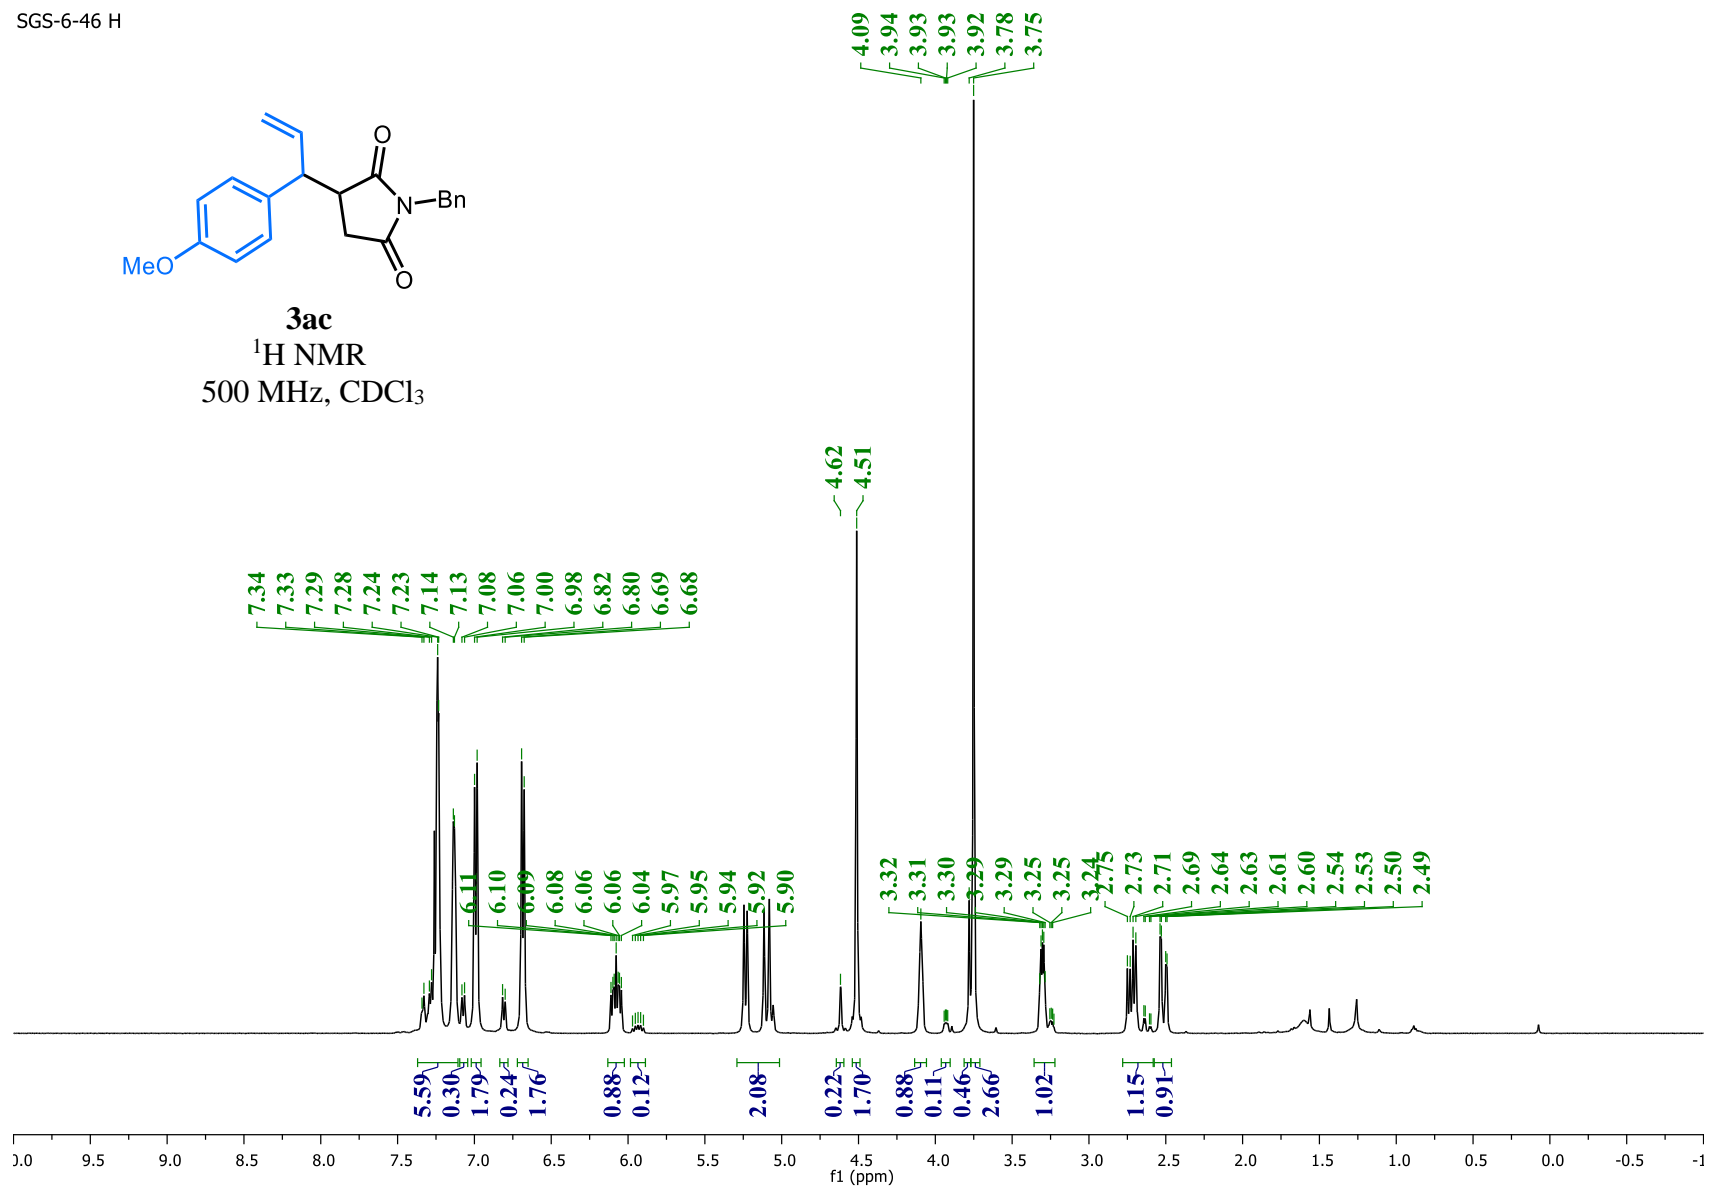



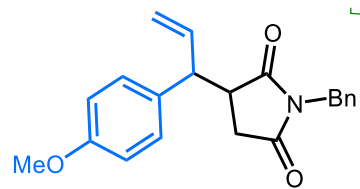

**3ac**  
<sup>13</sup>C NMR  
 126 MHz, CDCl<sub>3</sub>

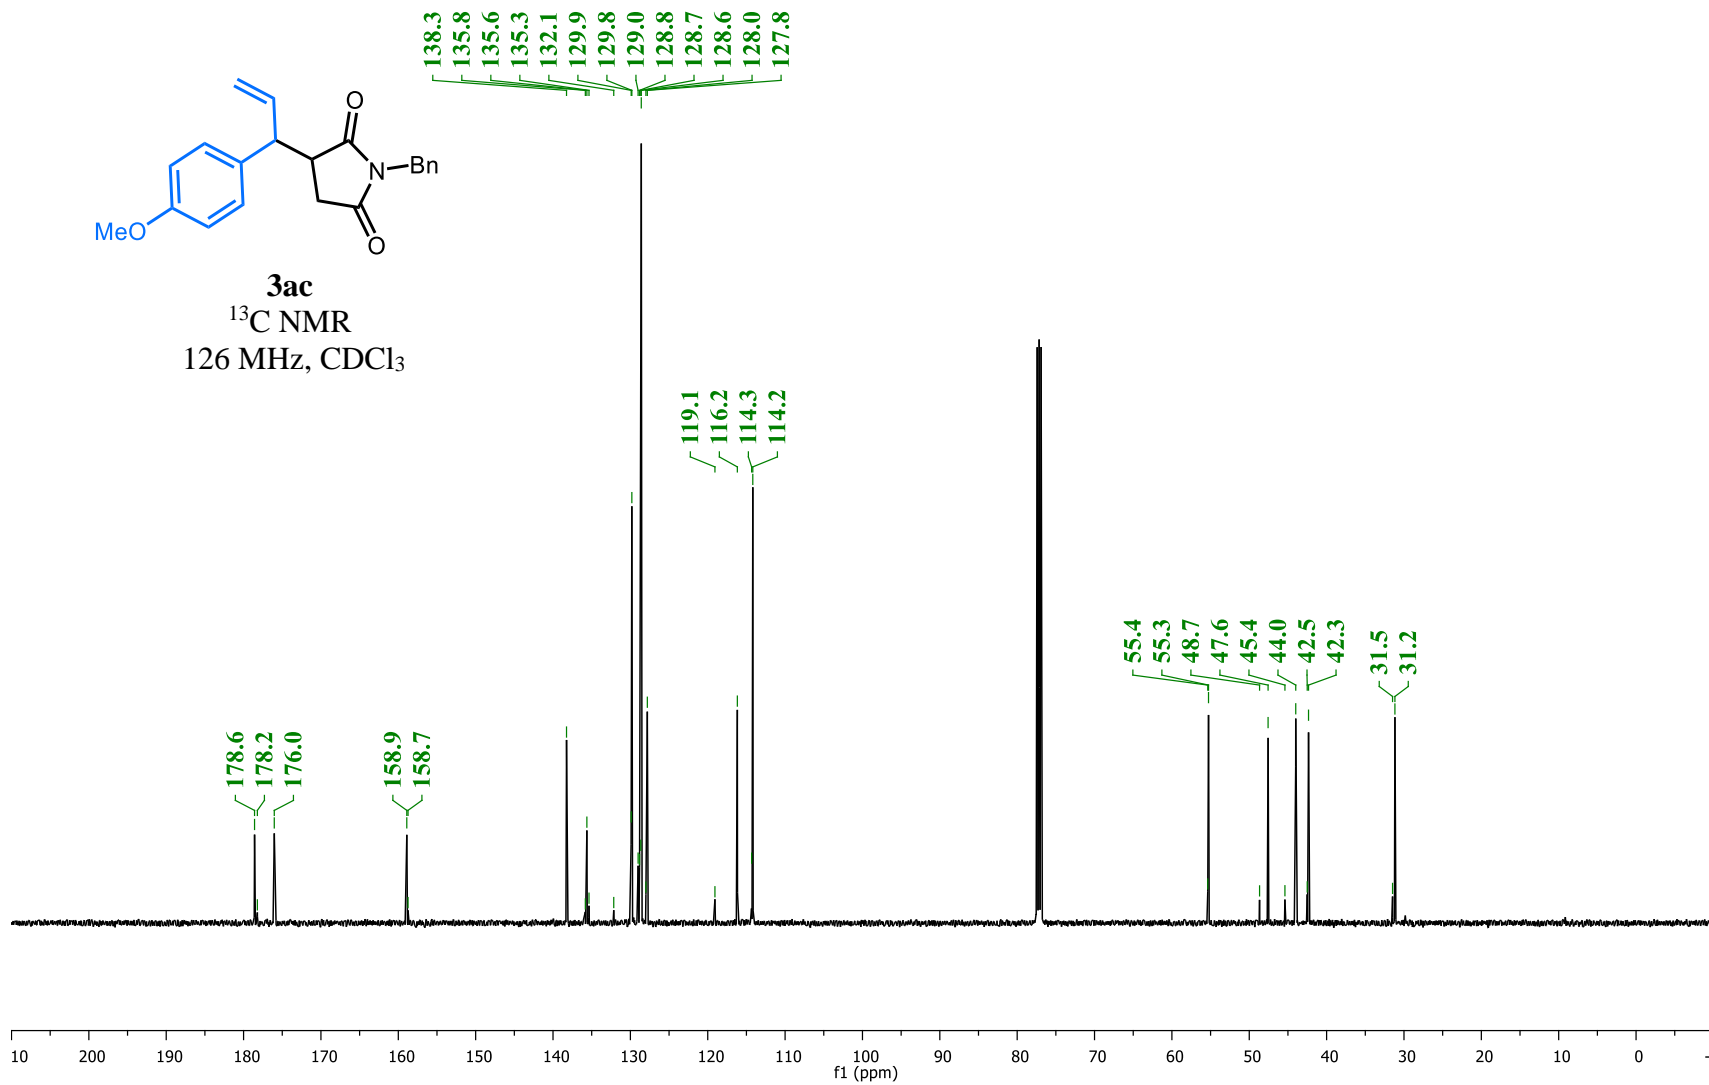

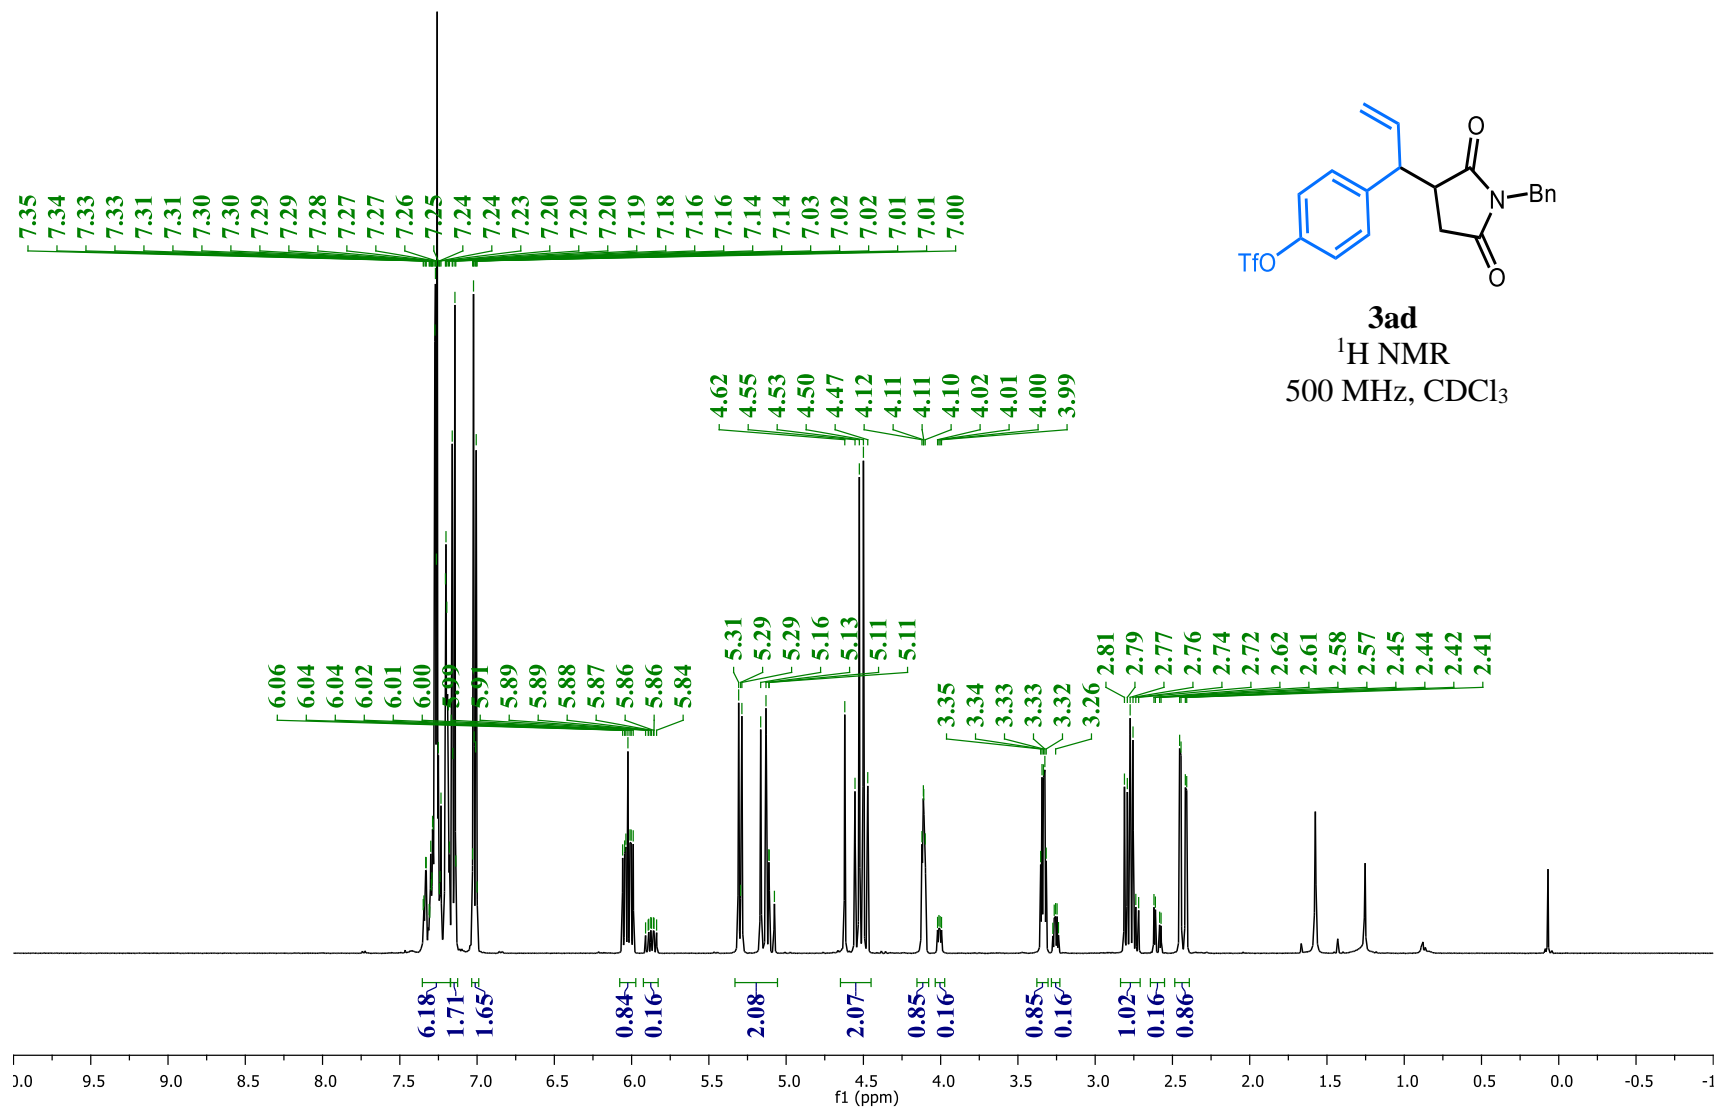

SGS-6-54 C

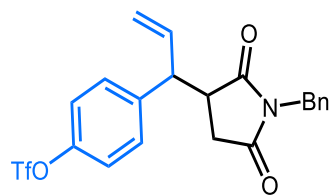

**3ad**  
<sup>13</sup>C NMR  
126 MHz, CDCl<sub>3</sub>

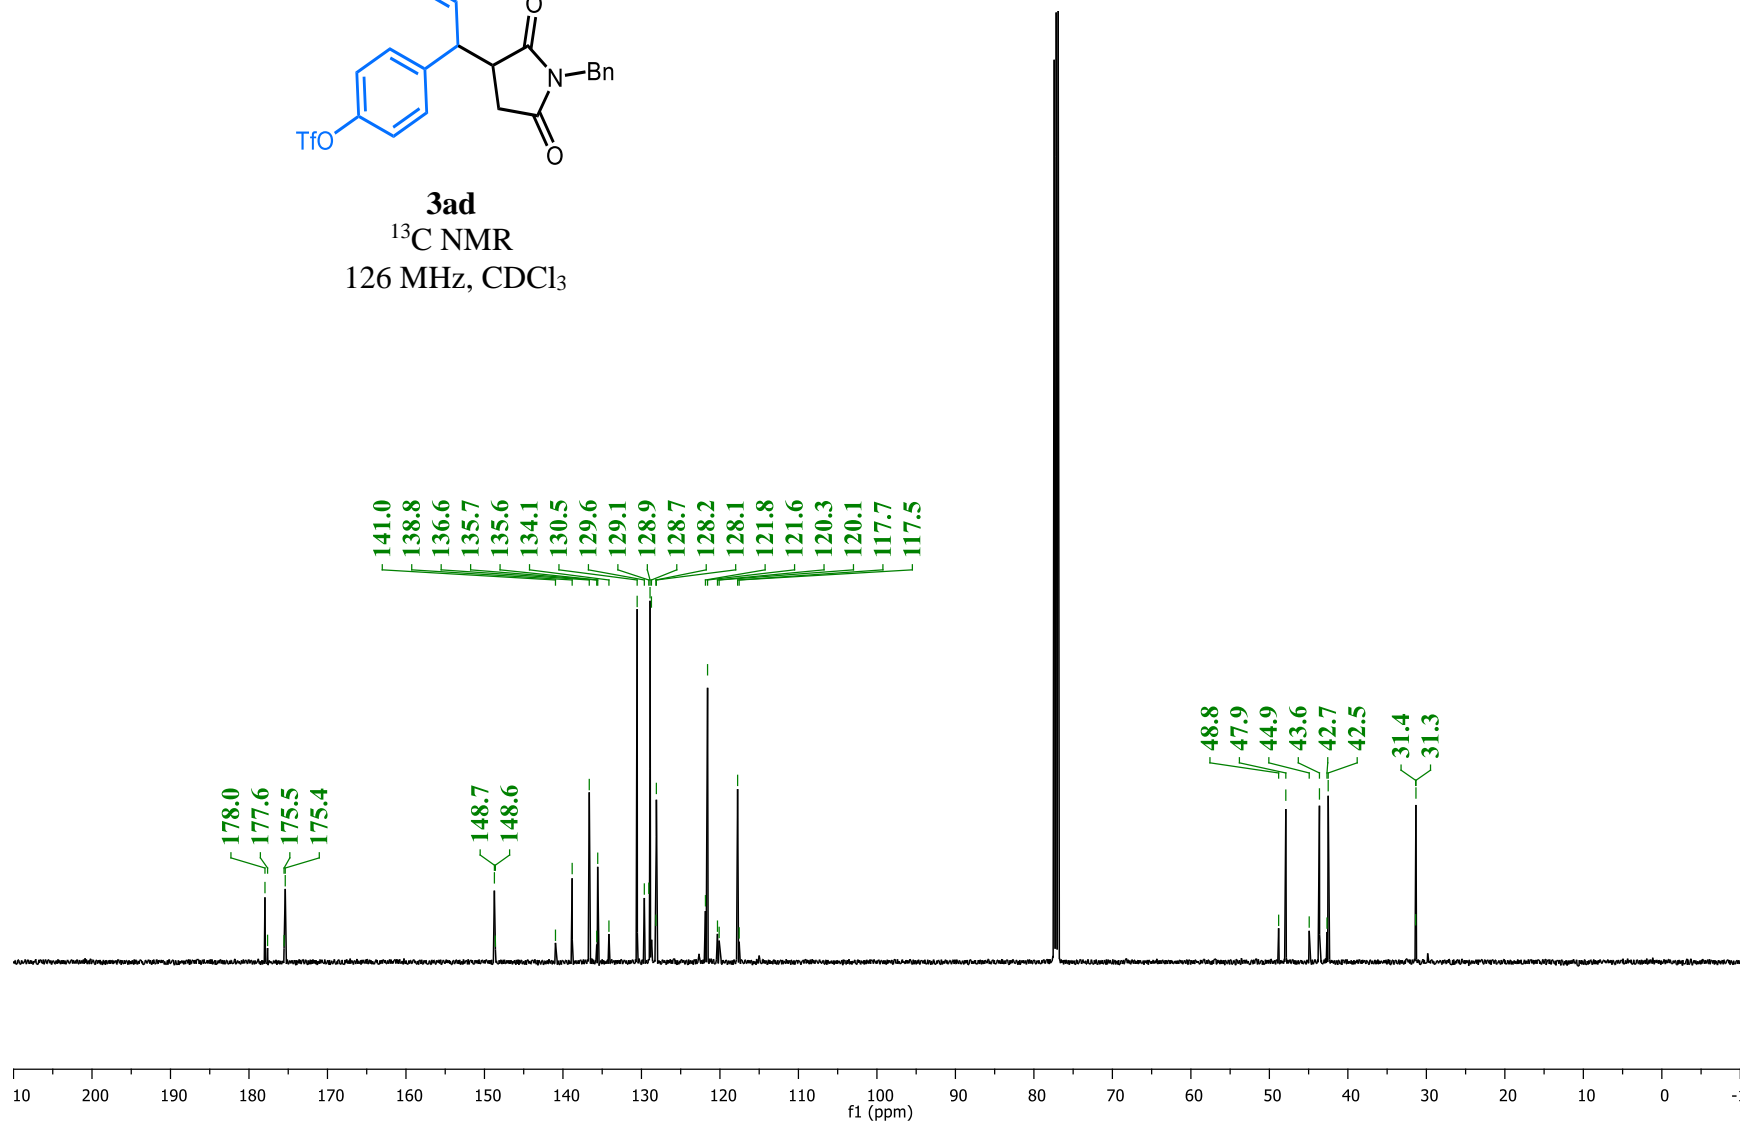

SGS-6-54 F

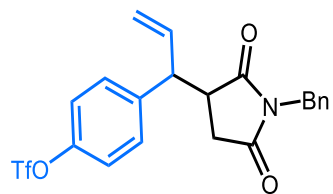

**3ad**  
<sup>19</sup>F NMR  
471 MHz, CDCl<sub>3</sub>

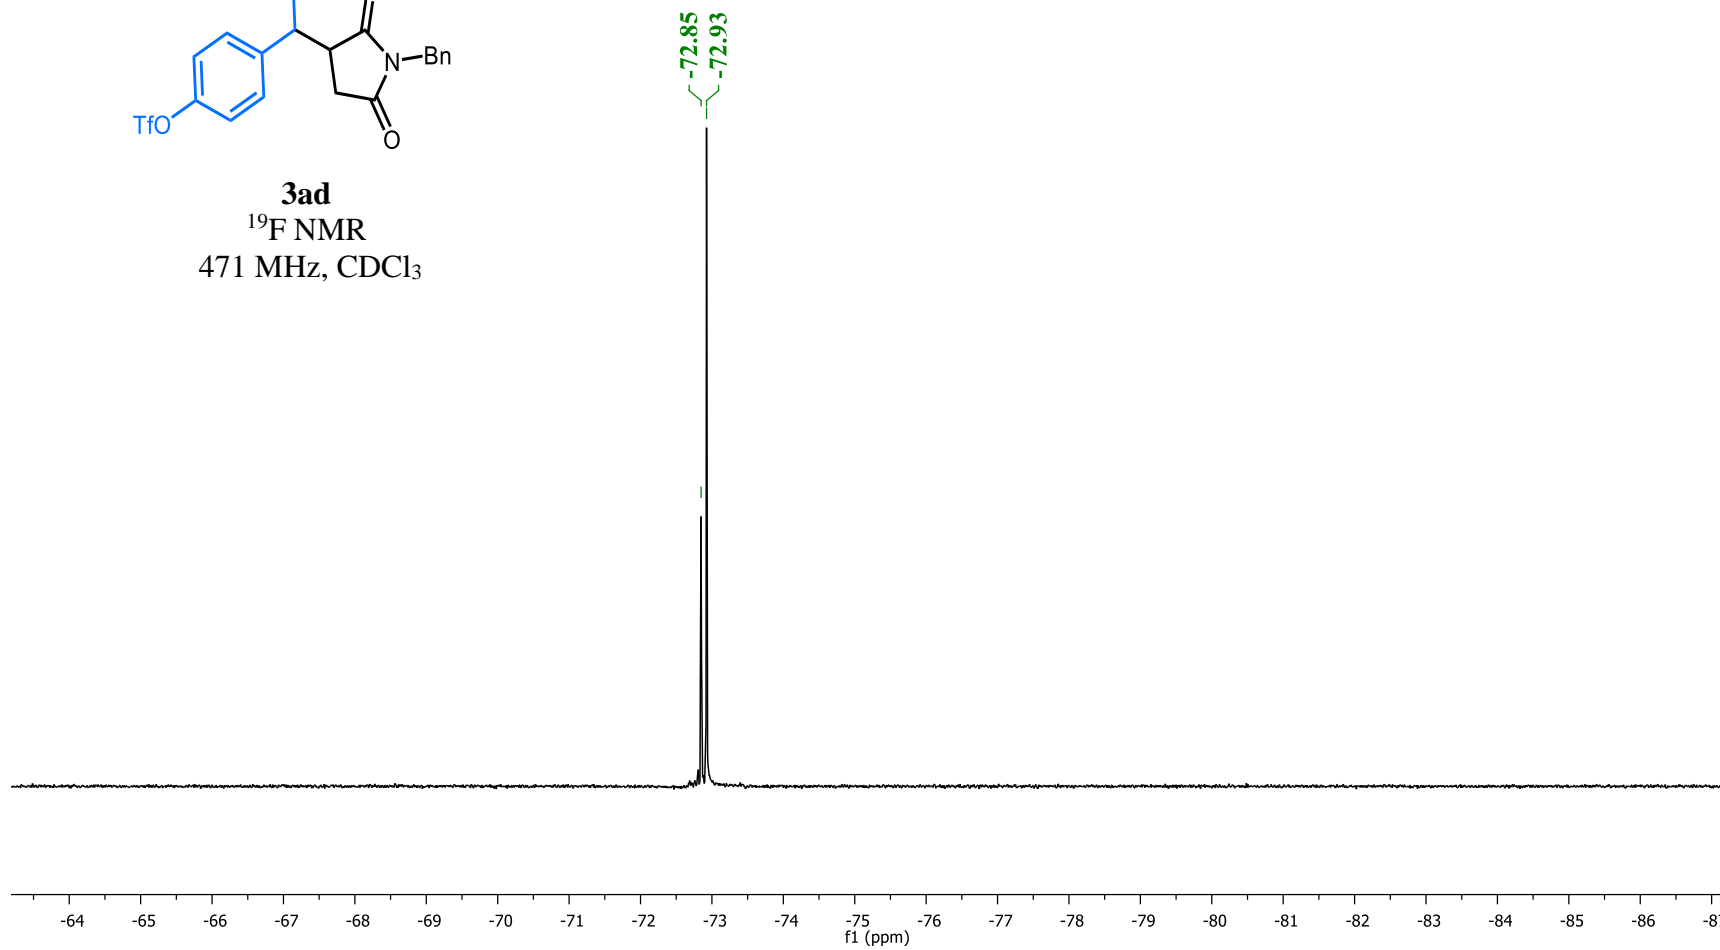

SGS-6-45 H

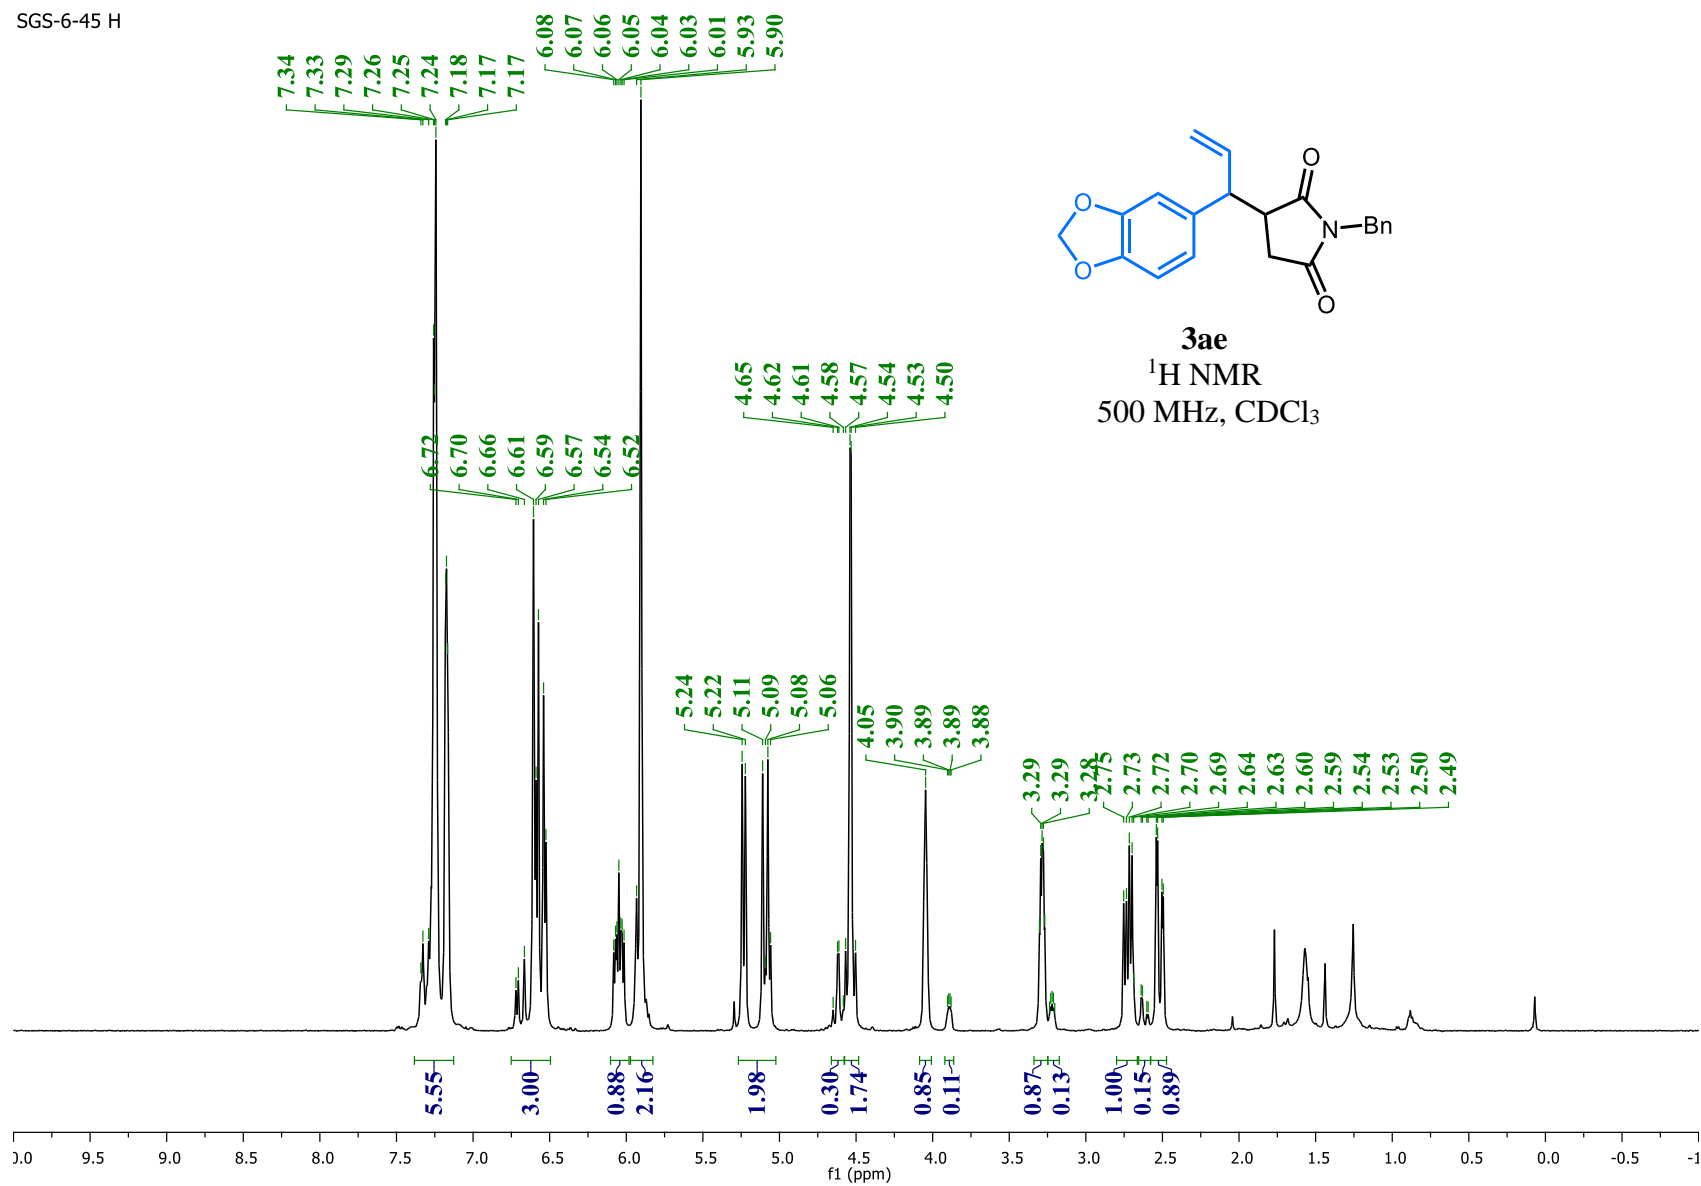

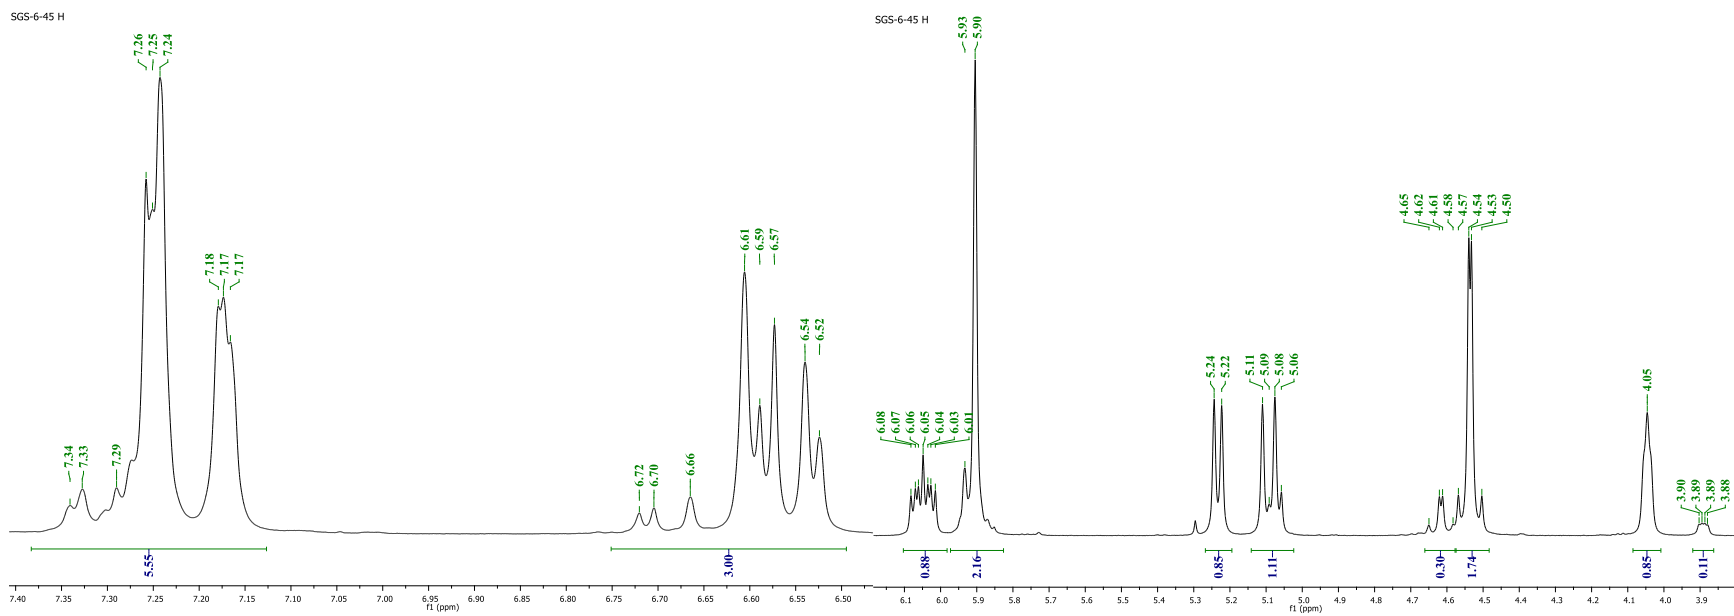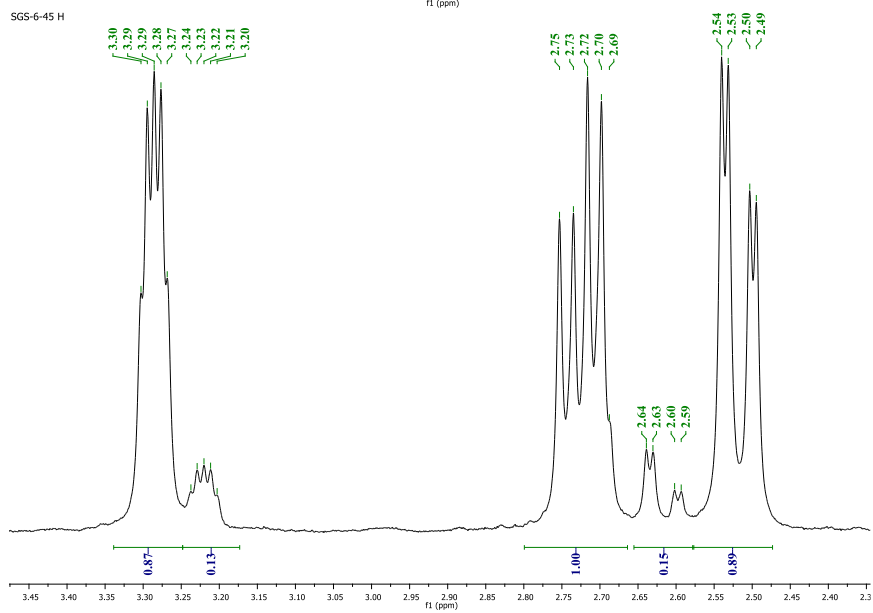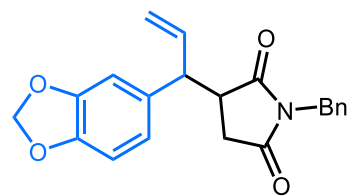

**3ae**  
 $^1\text{H}$  NMR  
 500 MHz,  $\text{CDCl}_3$

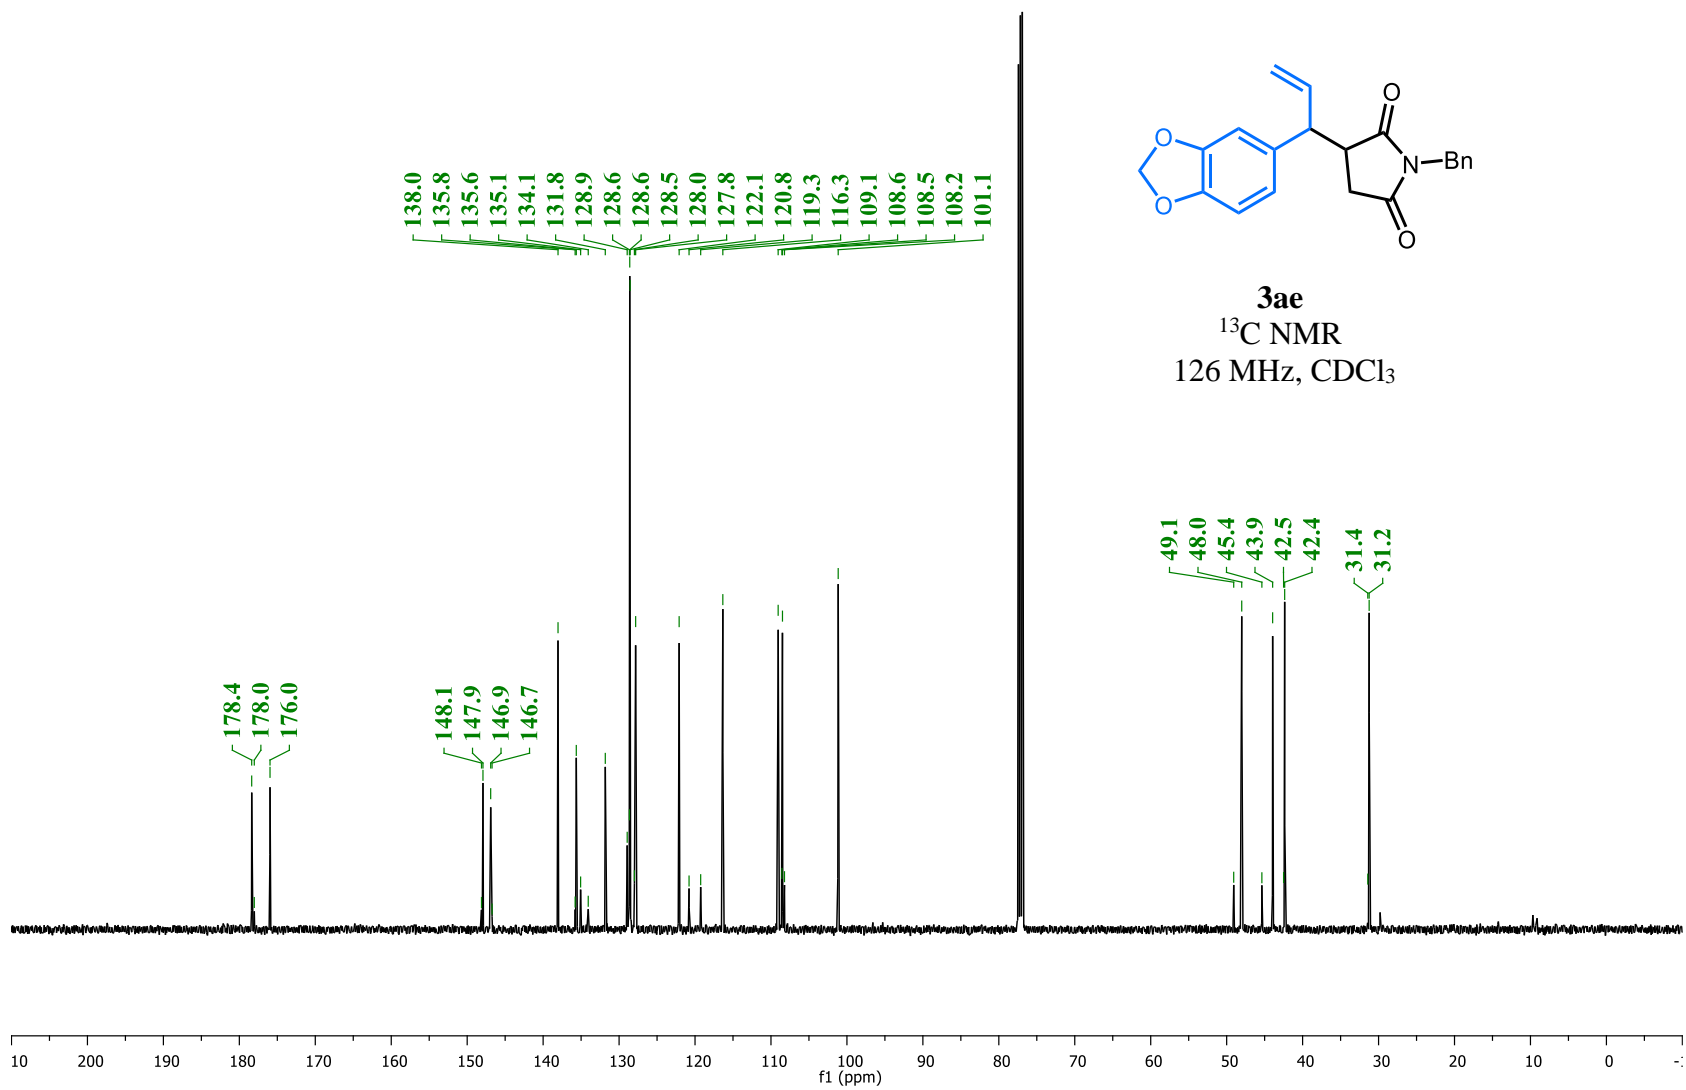

SGS-6-55 H

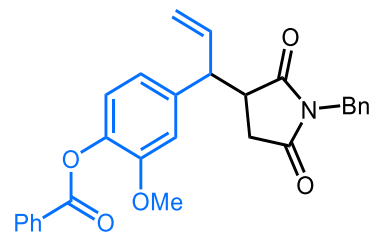

**3af**  
<sup>1</sup>H NMR  
500 MHz, CDCl<sub>3</sub>

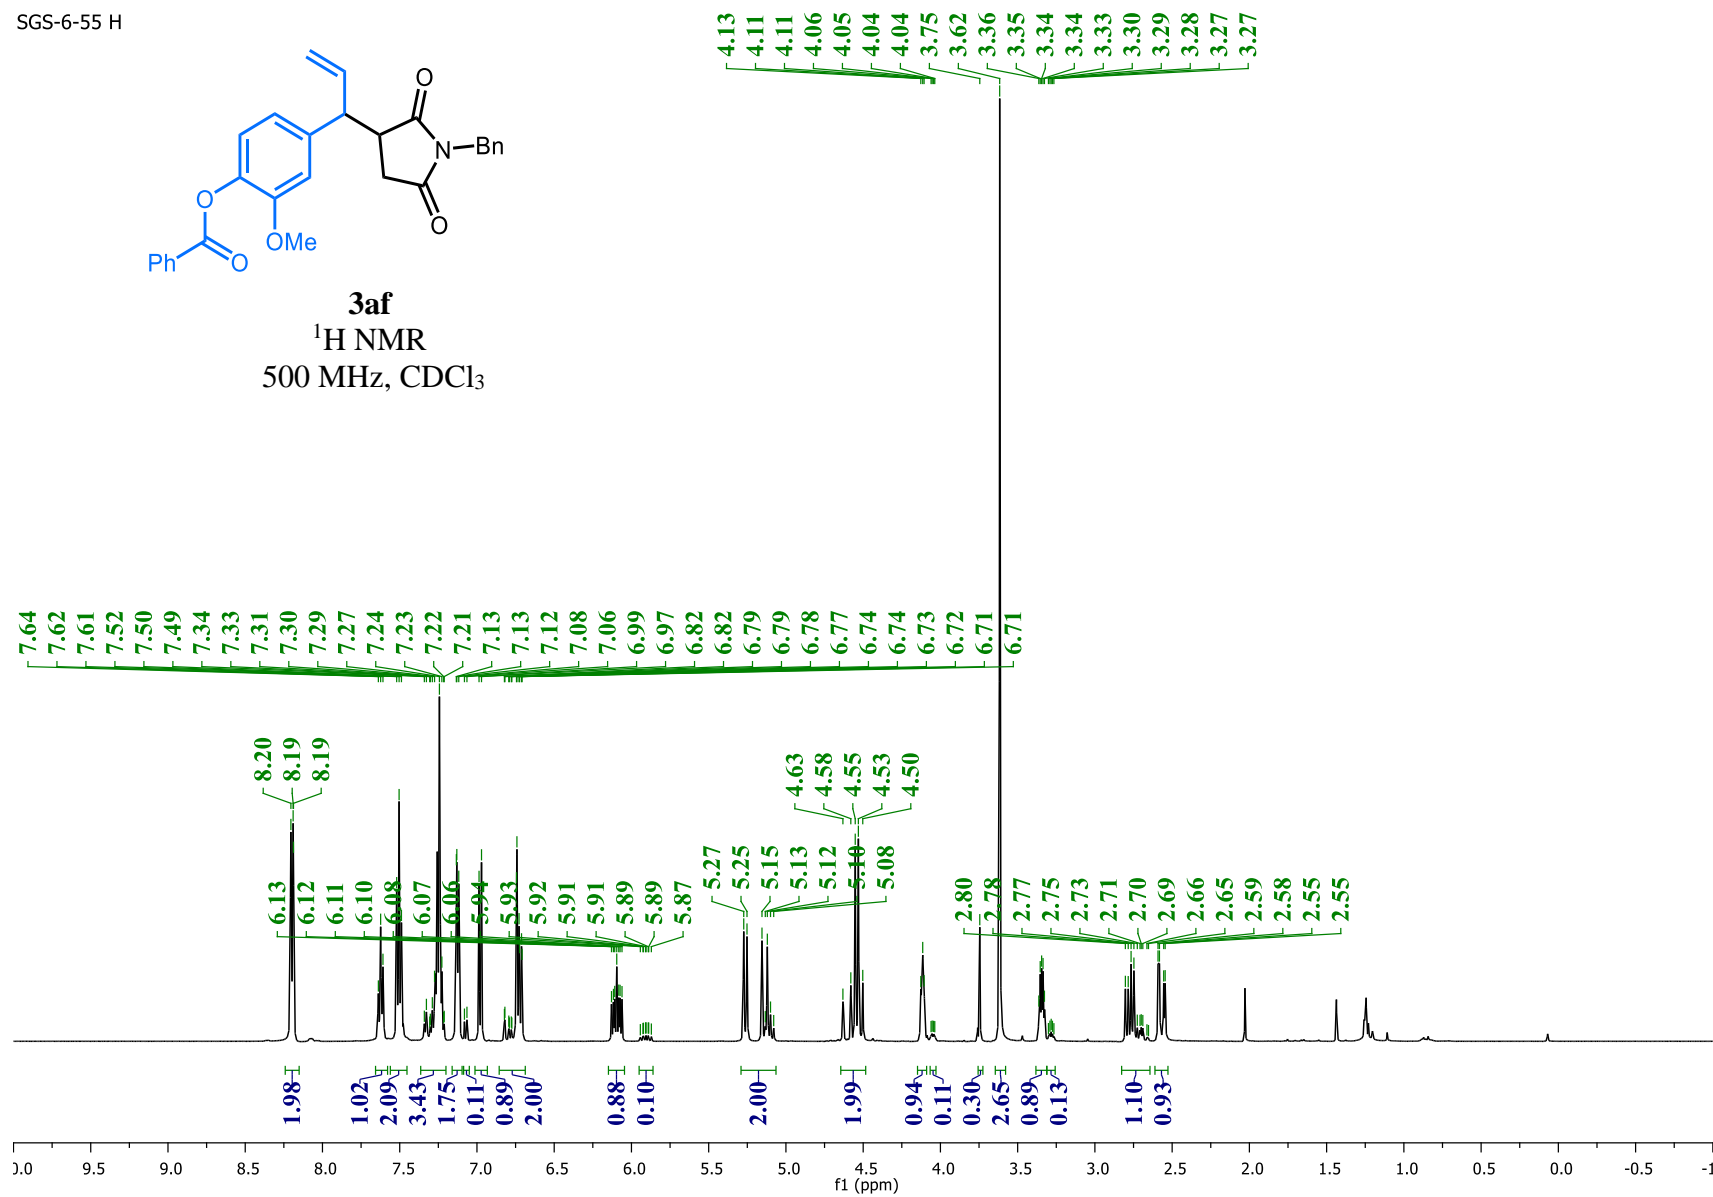



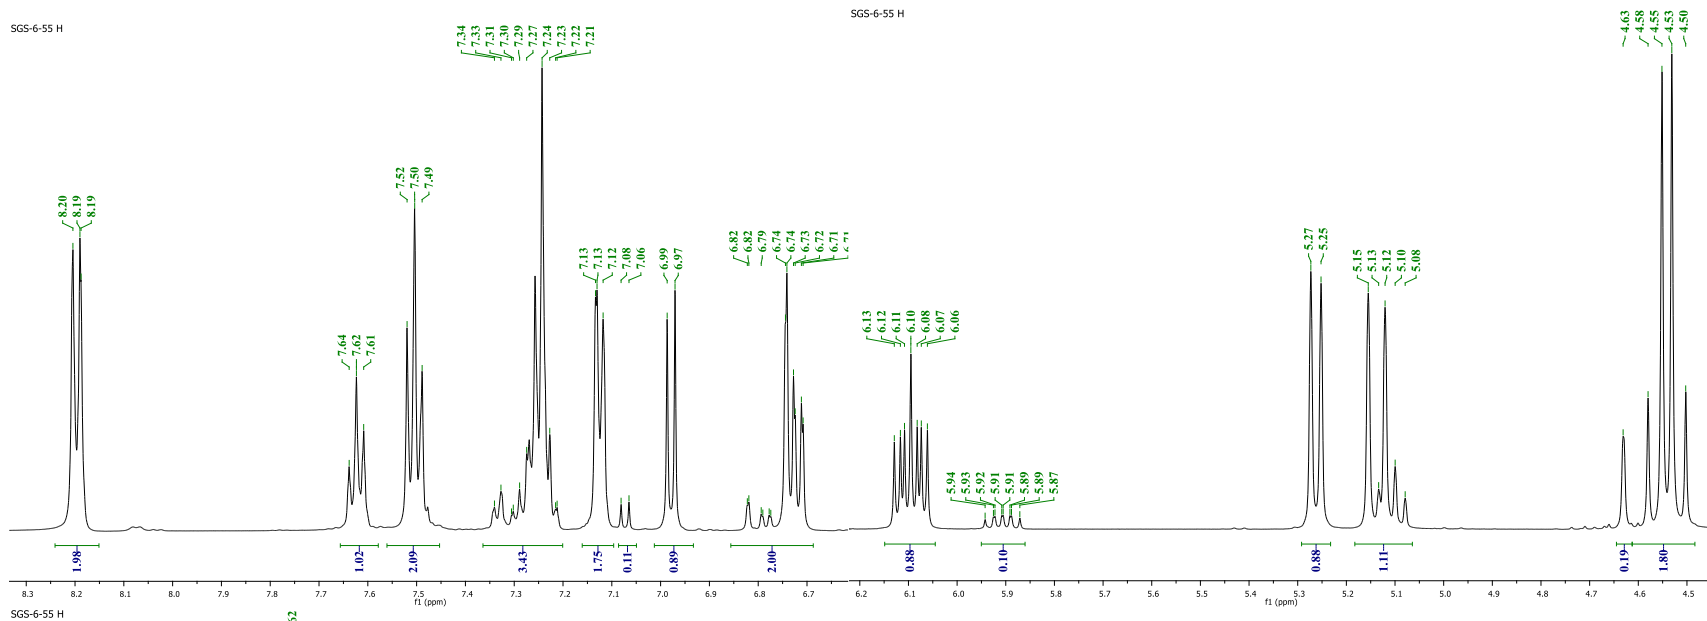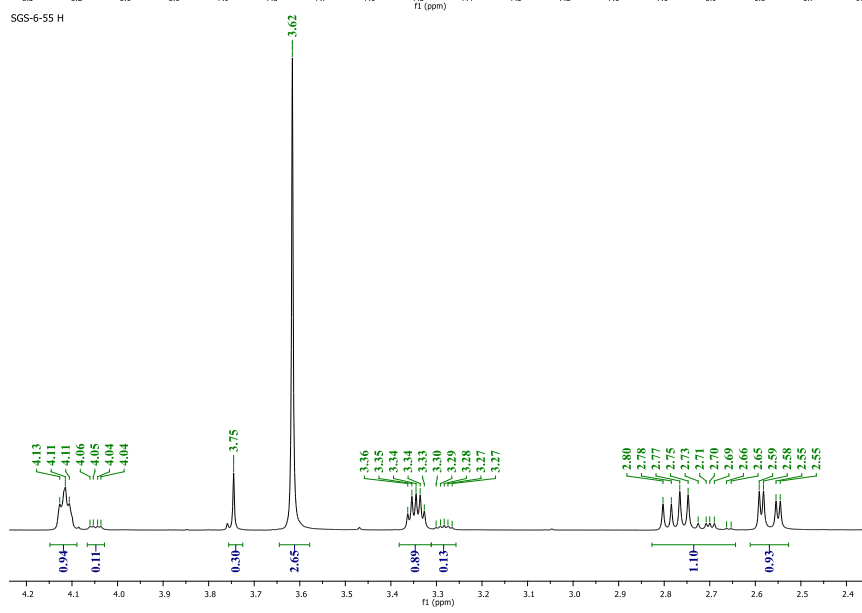

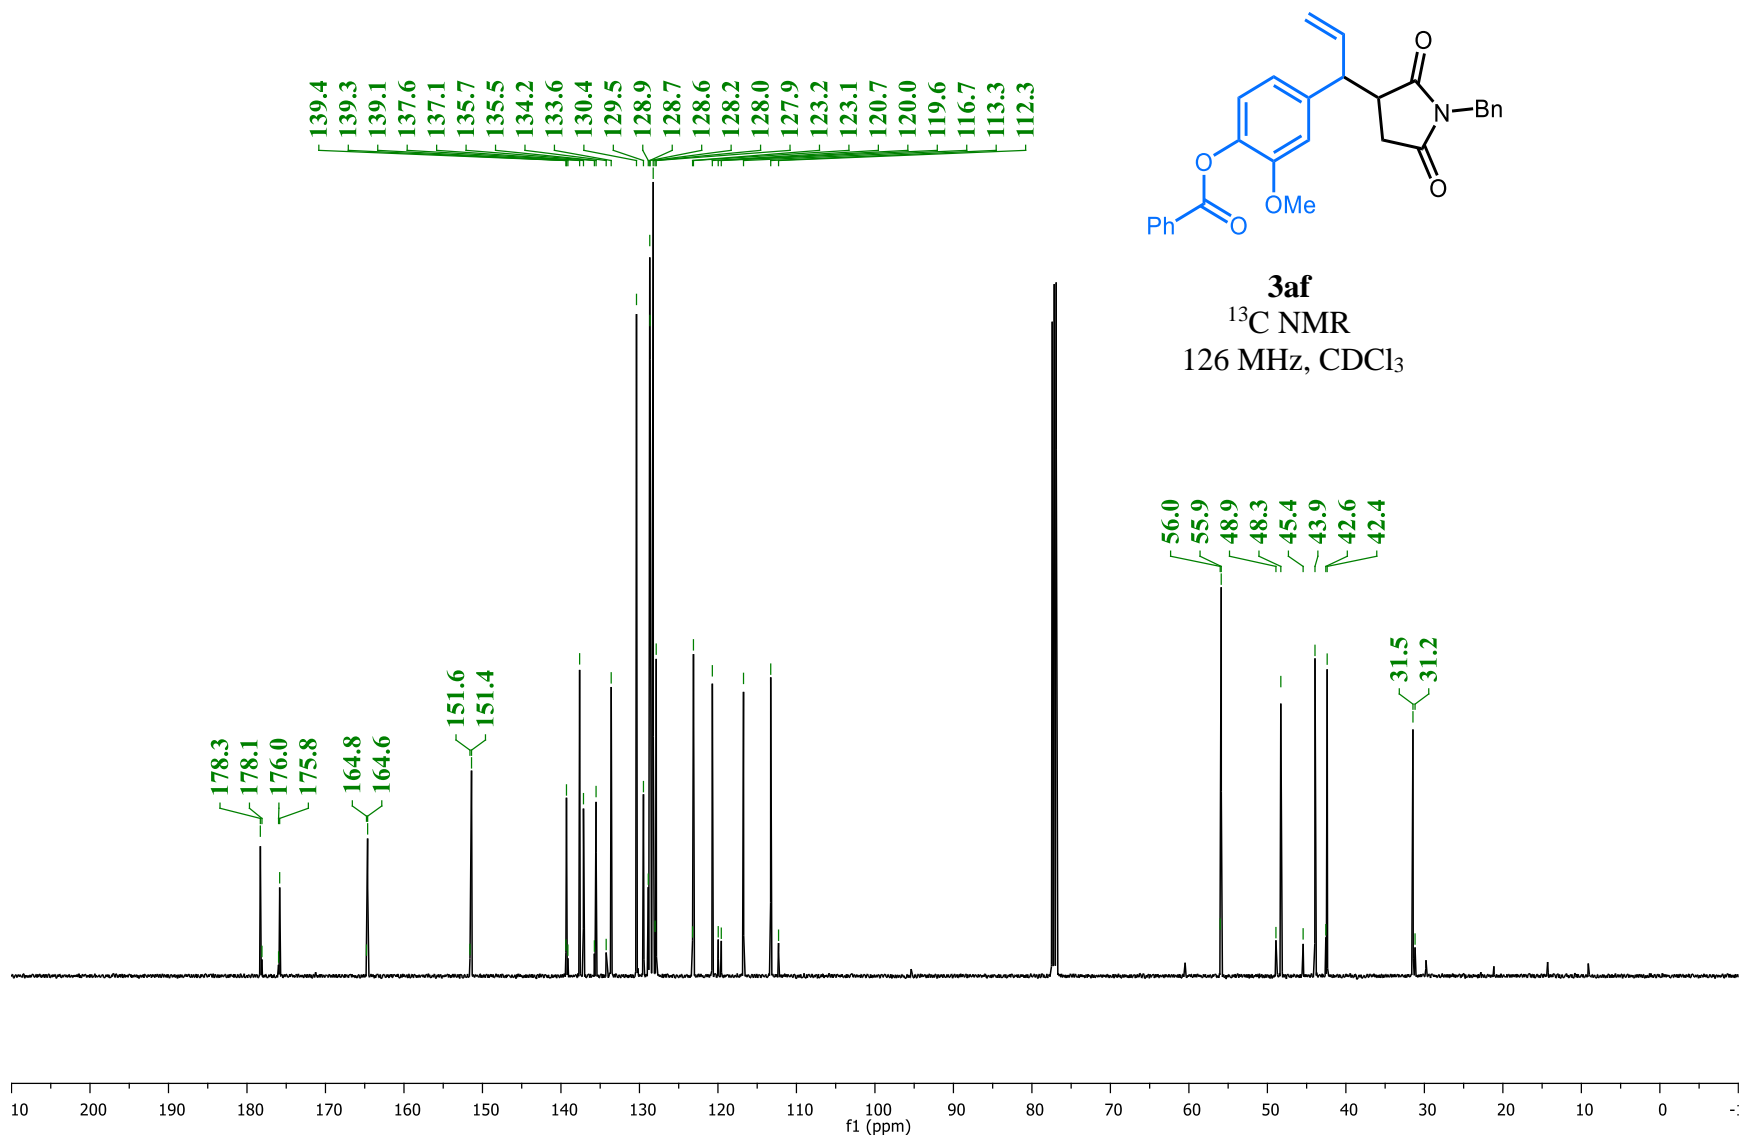

SGS-6-47 H

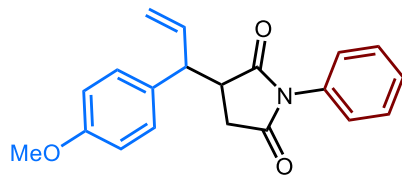

**3fc**

<sup>1</sup>H NMR  
500 MHz, CDCl<sub>3</sub>

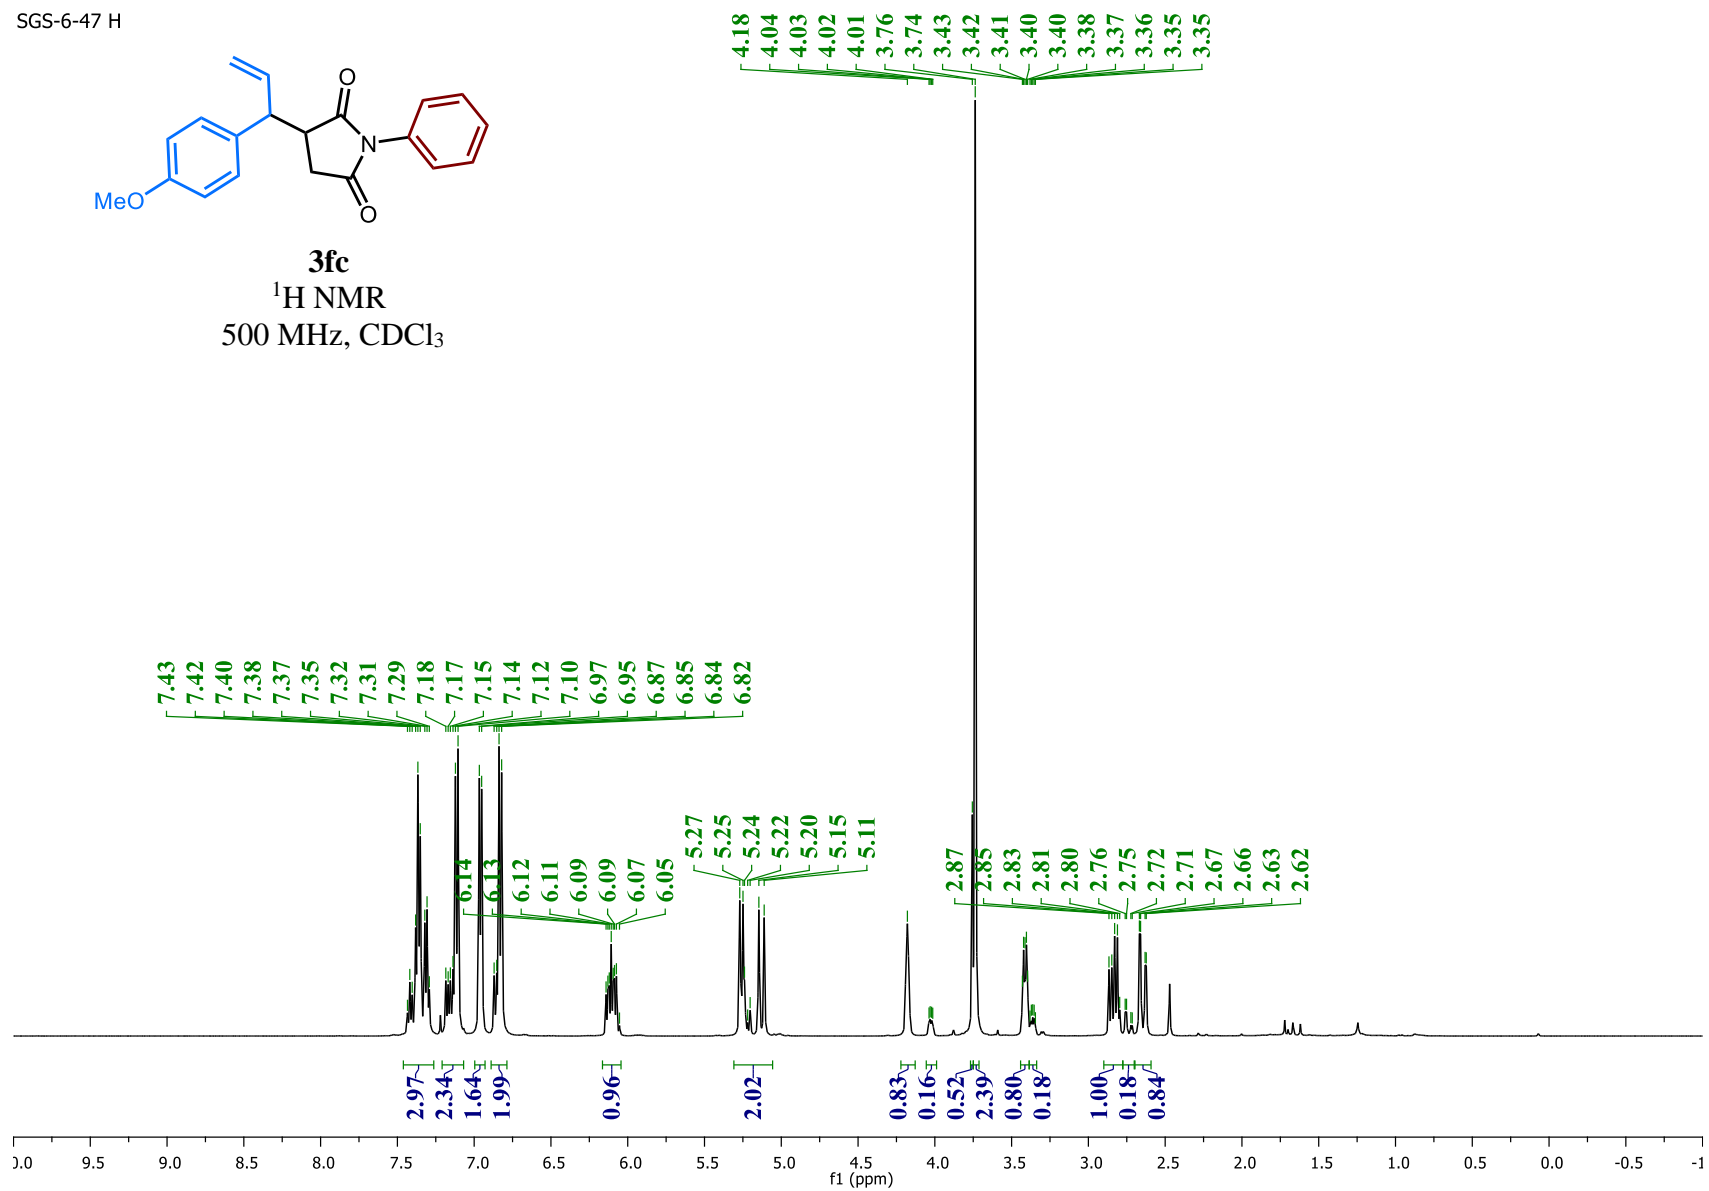

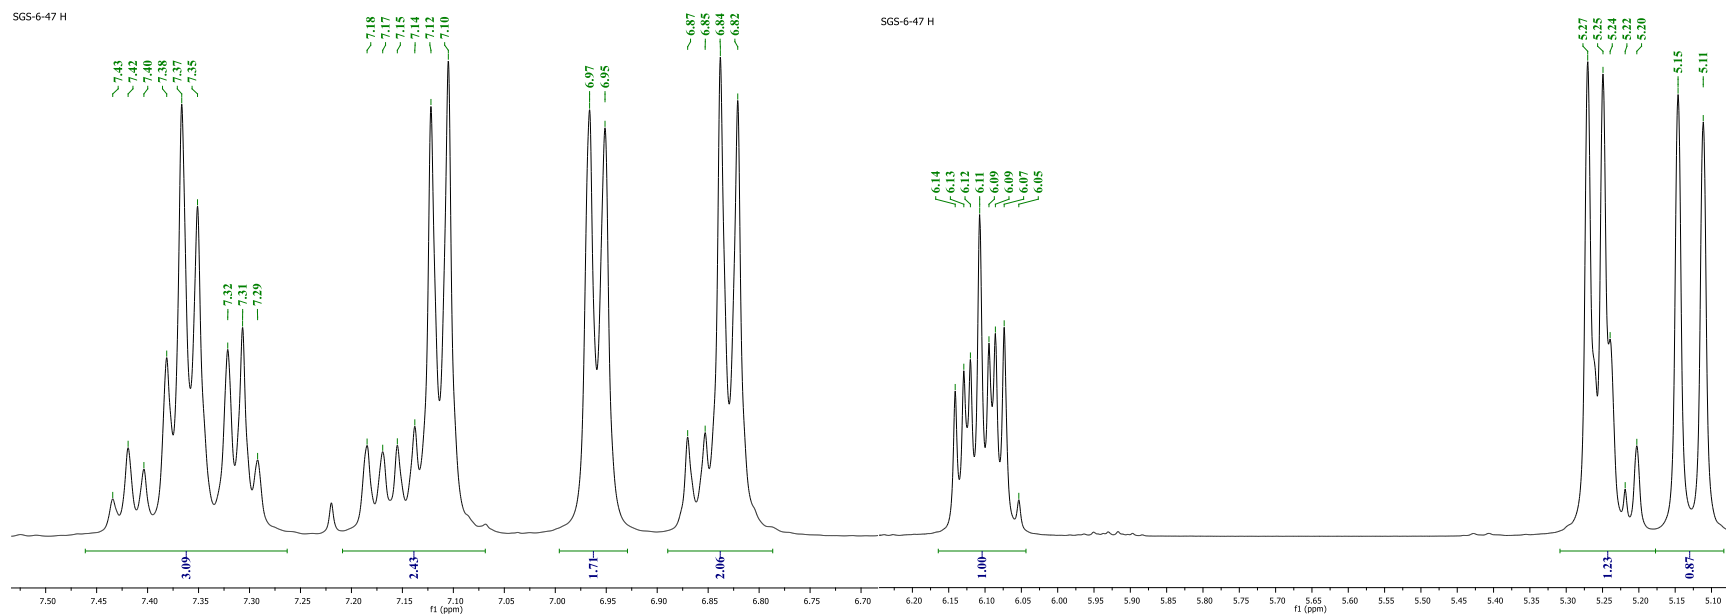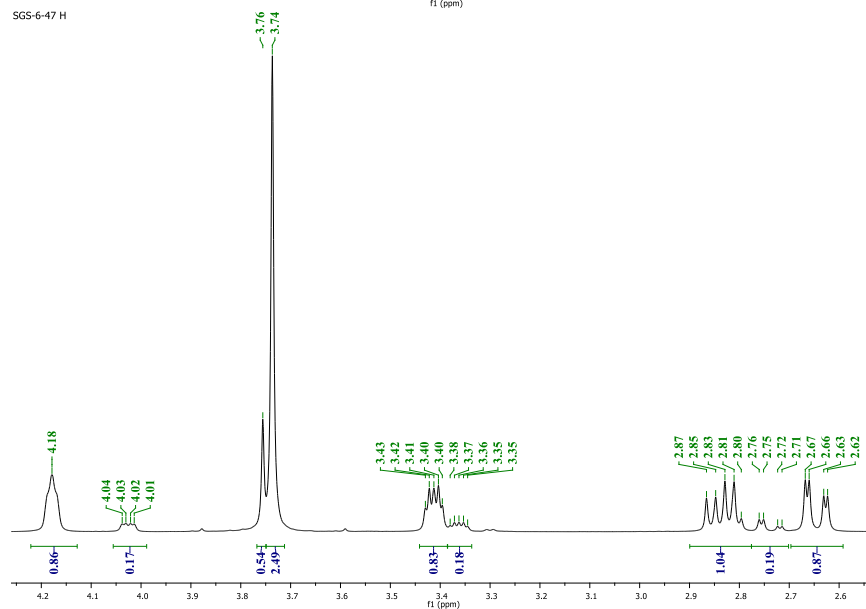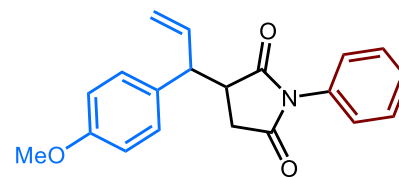

**3fc**  
<sup>1</sup>H NMR  
 500 MHz, CDCl<sub>3</sub>

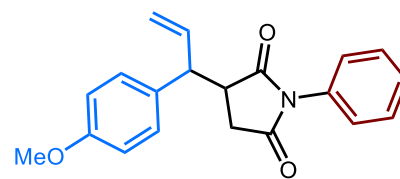

**3c**  
<sup>13</sup>C NMR  
126 MHz, CDCl<sub>3</sub>

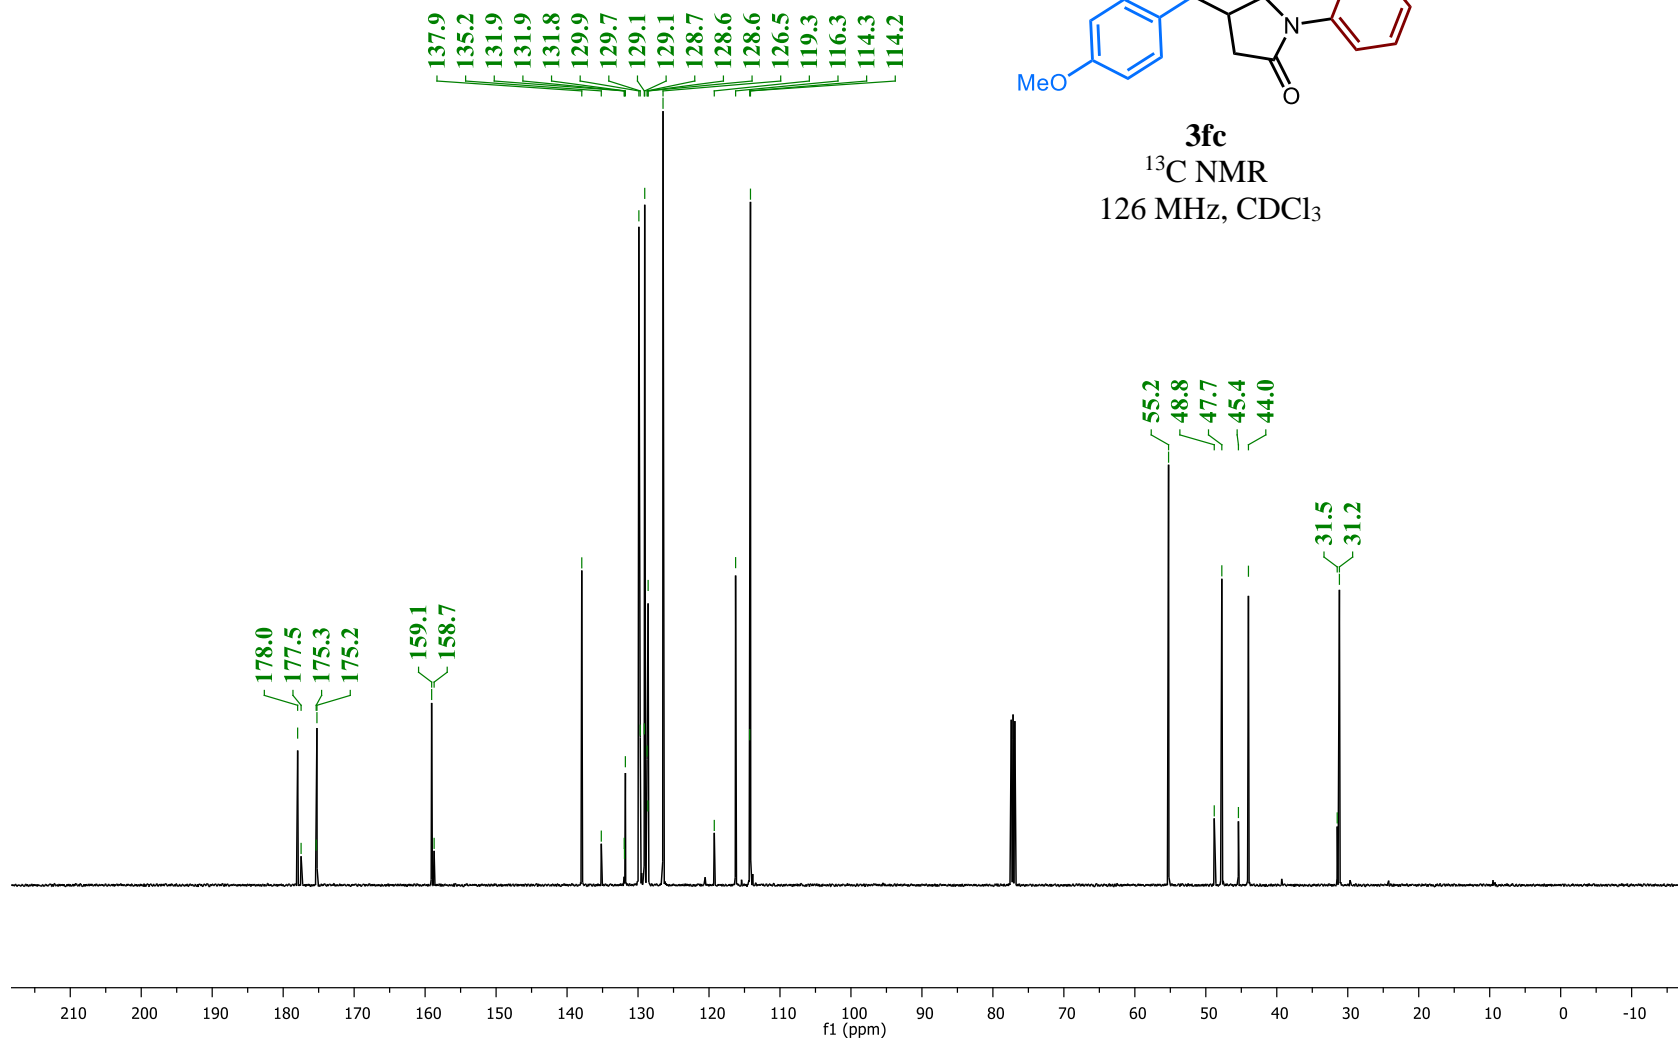

## 7.2 NMR spectra: Oxazolidinone Scope

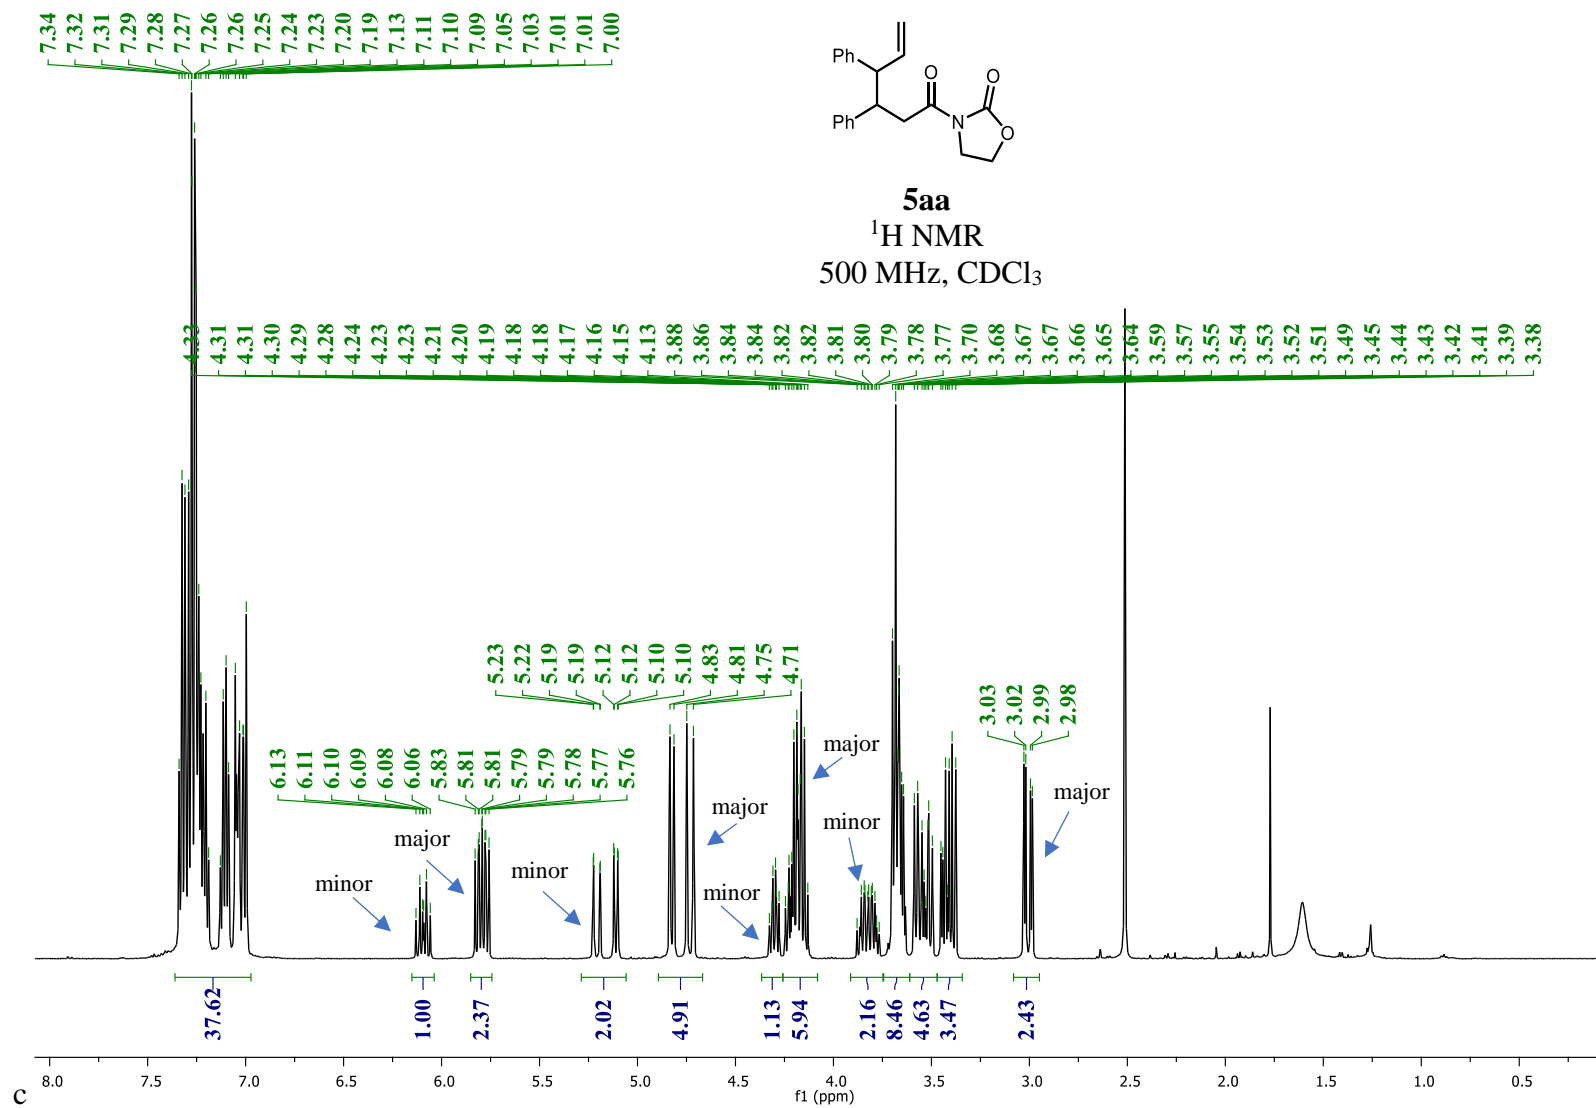

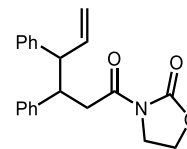

**5aa**

<sup>13</sup>C NMR  
126 MHz, CDCl<sub>3</sub>

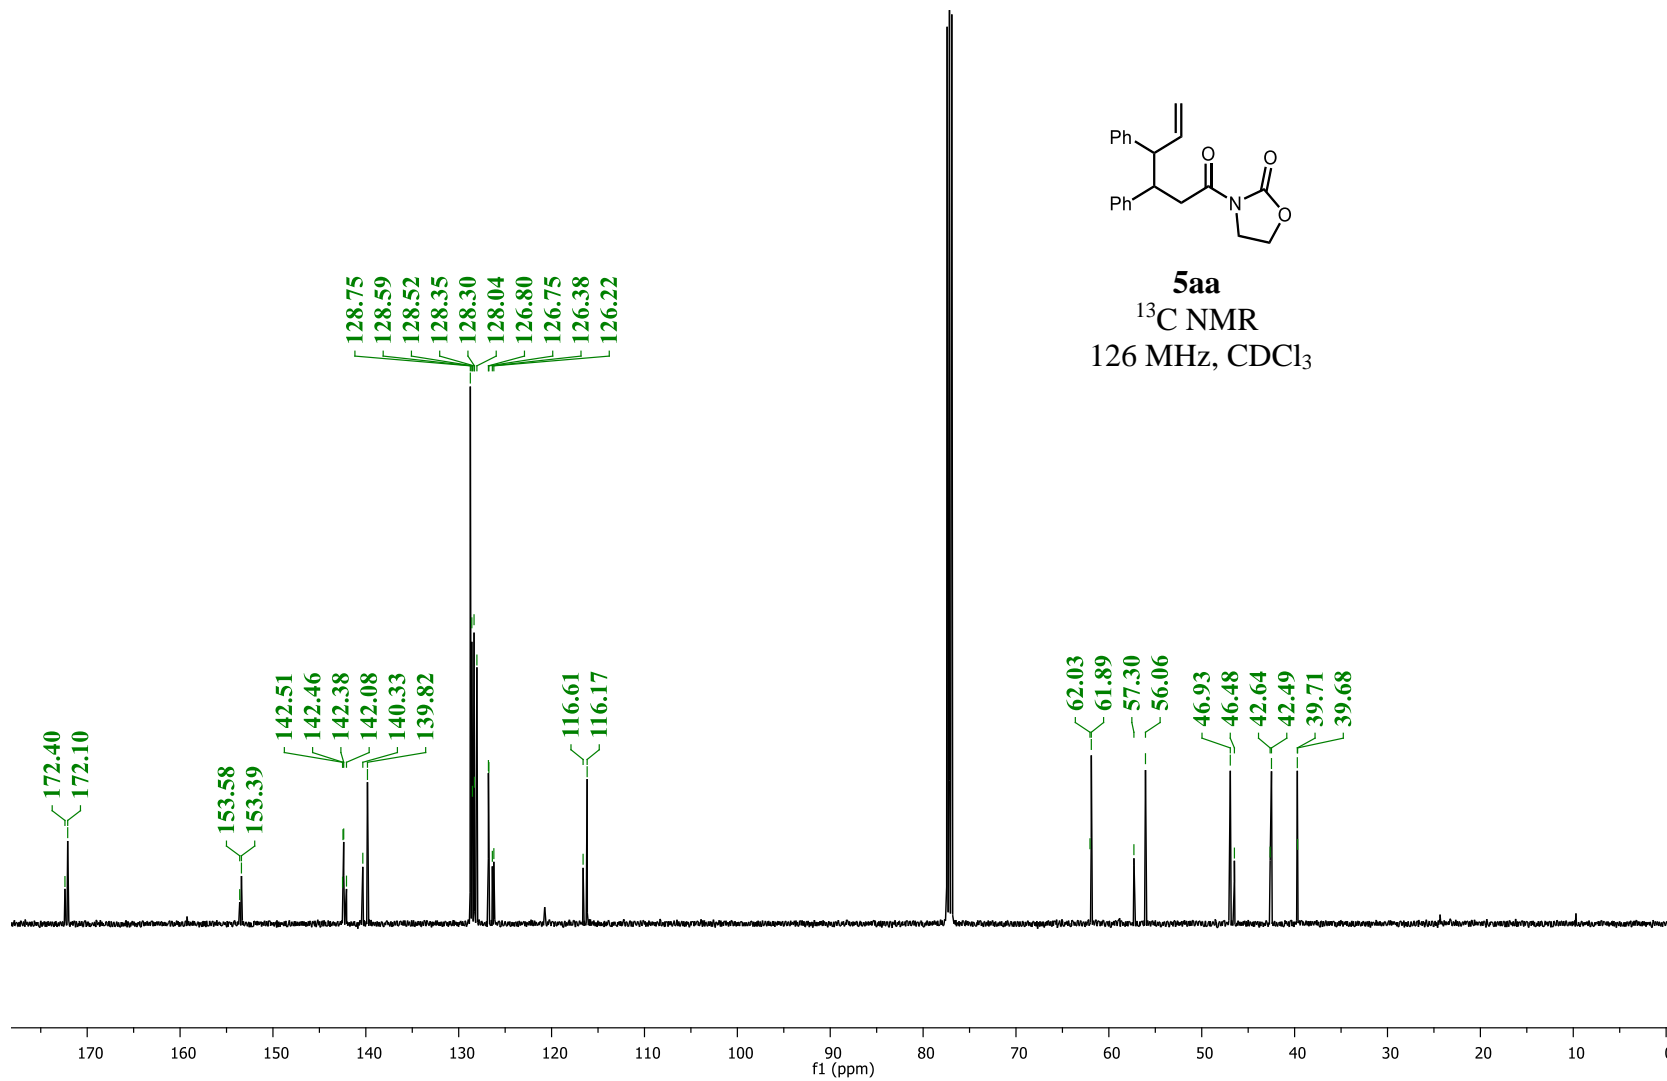

S107

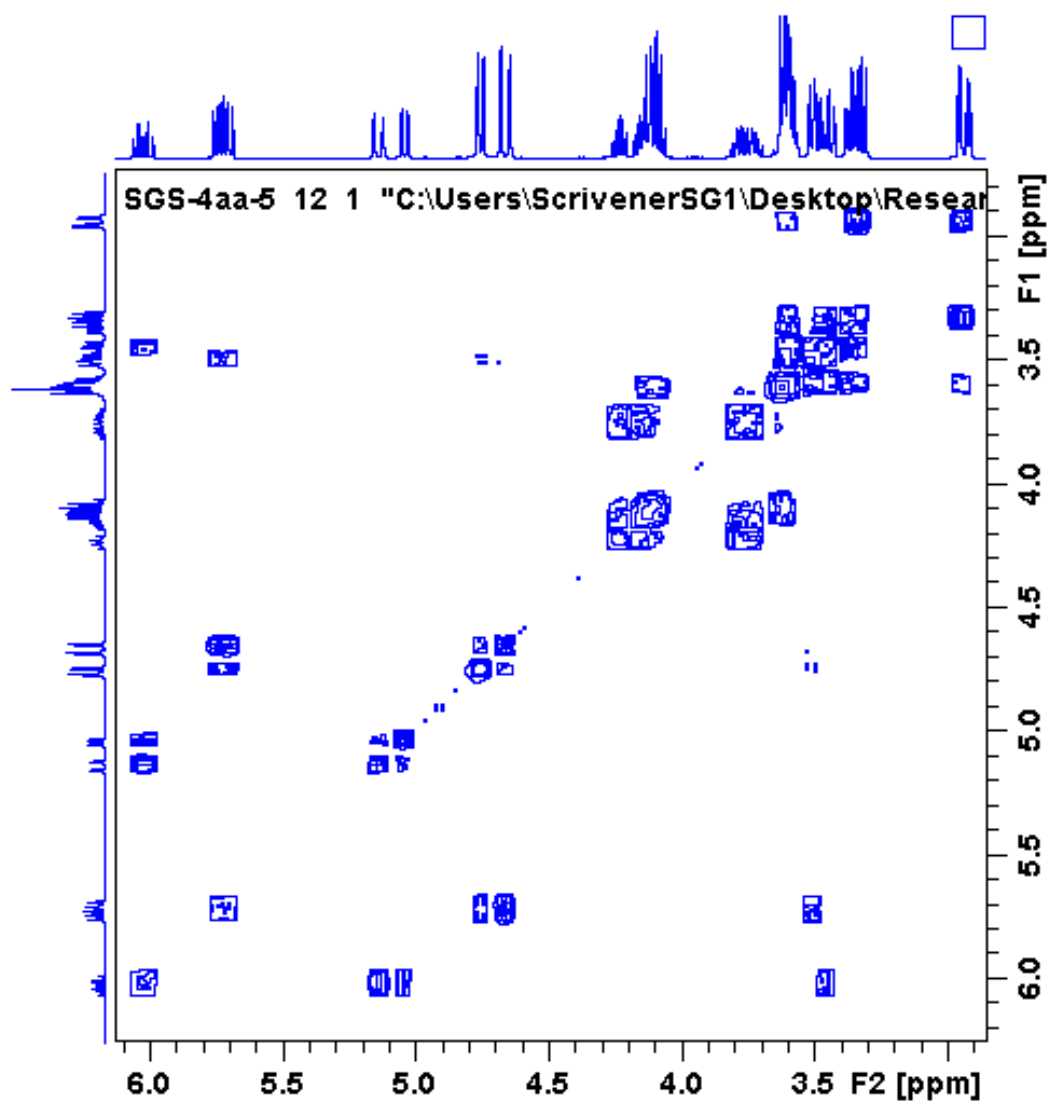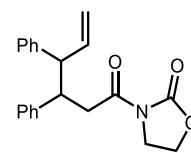

**5aa**

COSY NMR - aliphatic  
500 MHz, CDCl<sub>3</sub>



SGS-6-71 H

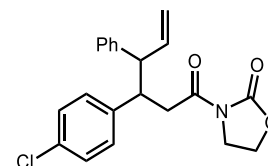

**5ba**  
<sup>1</sup>H NMR  
500 MHz, CDCl<sub>3</sub>

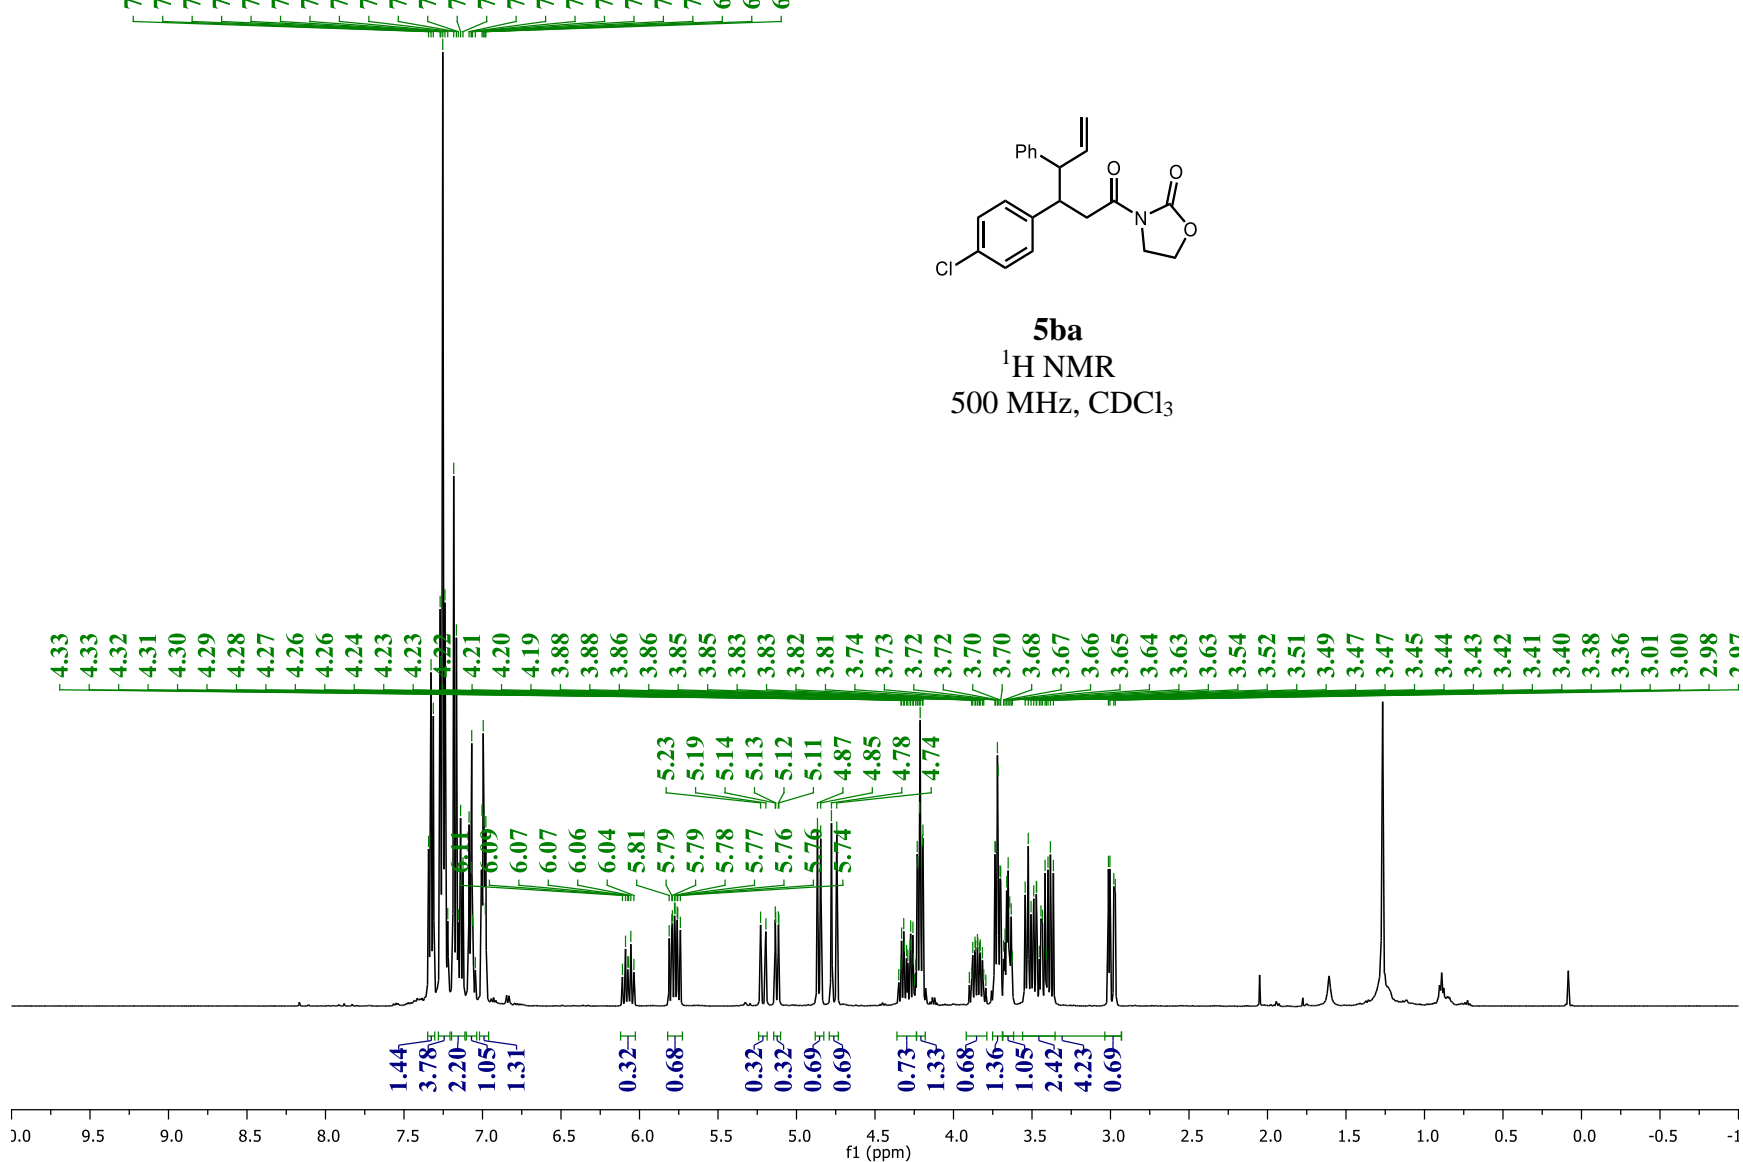

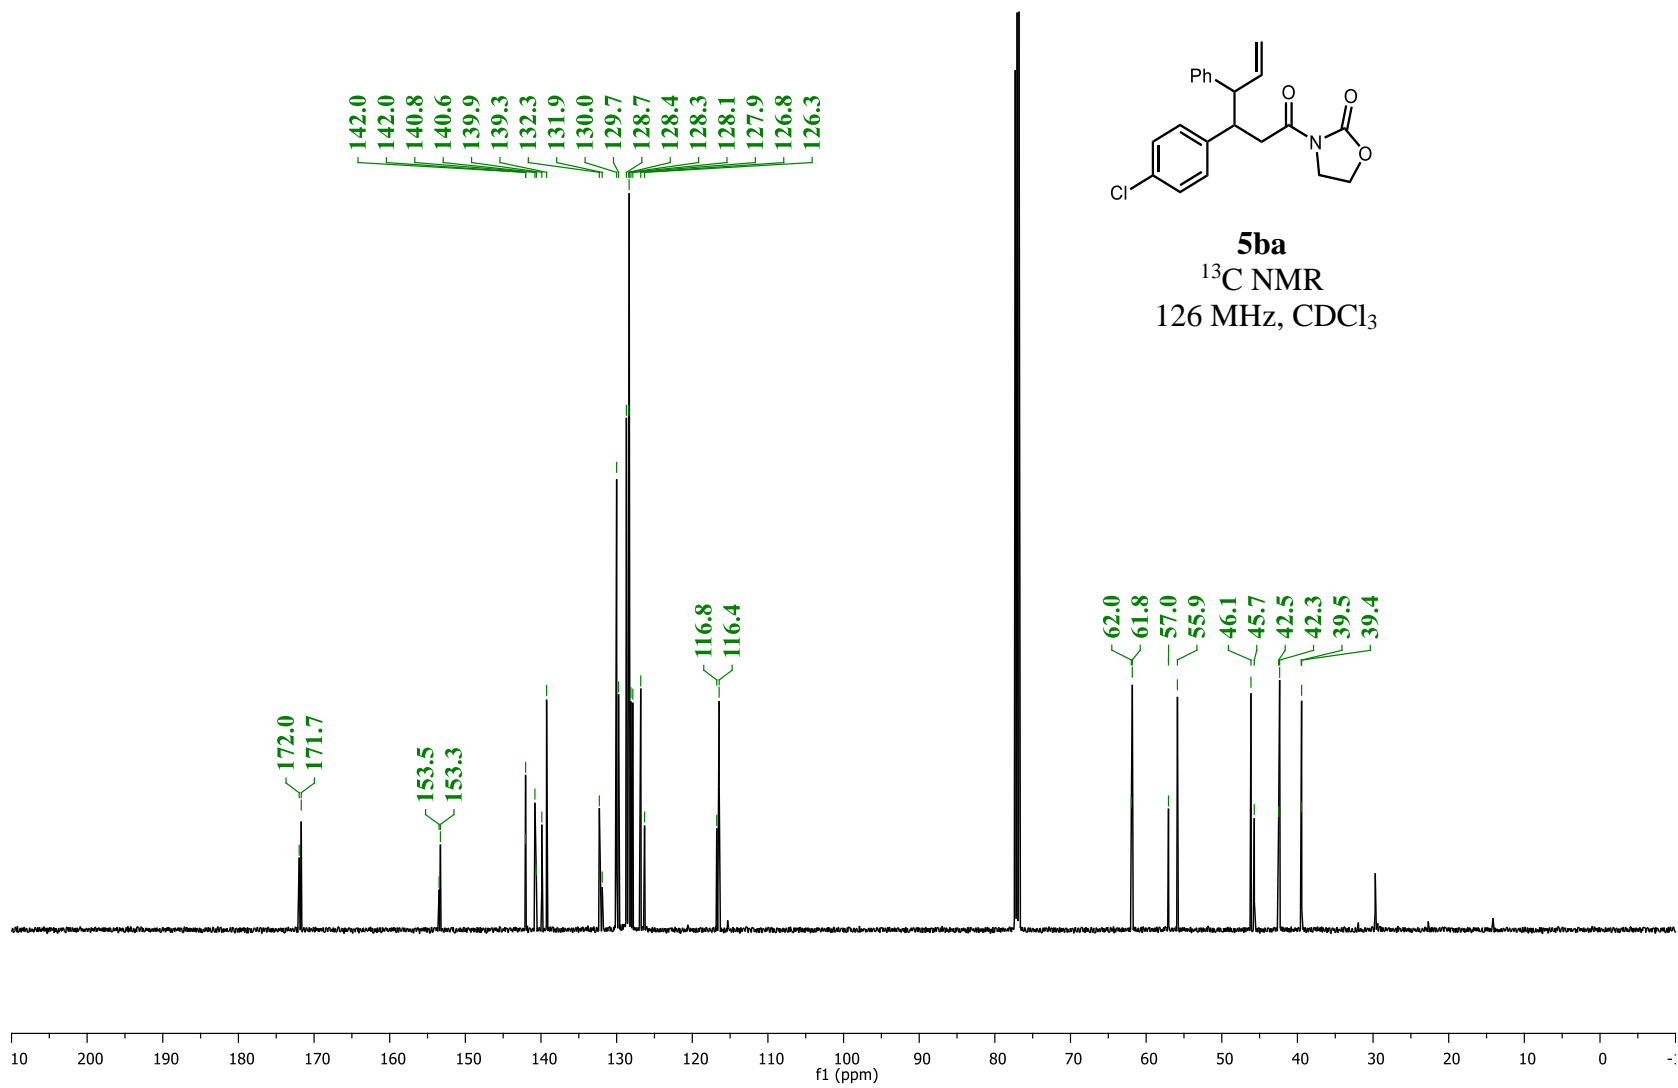

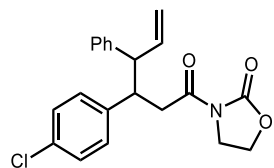

**5ba**  
COSY NMR - aliphatic  
500 MHz, CDCl<sub>3</sub>

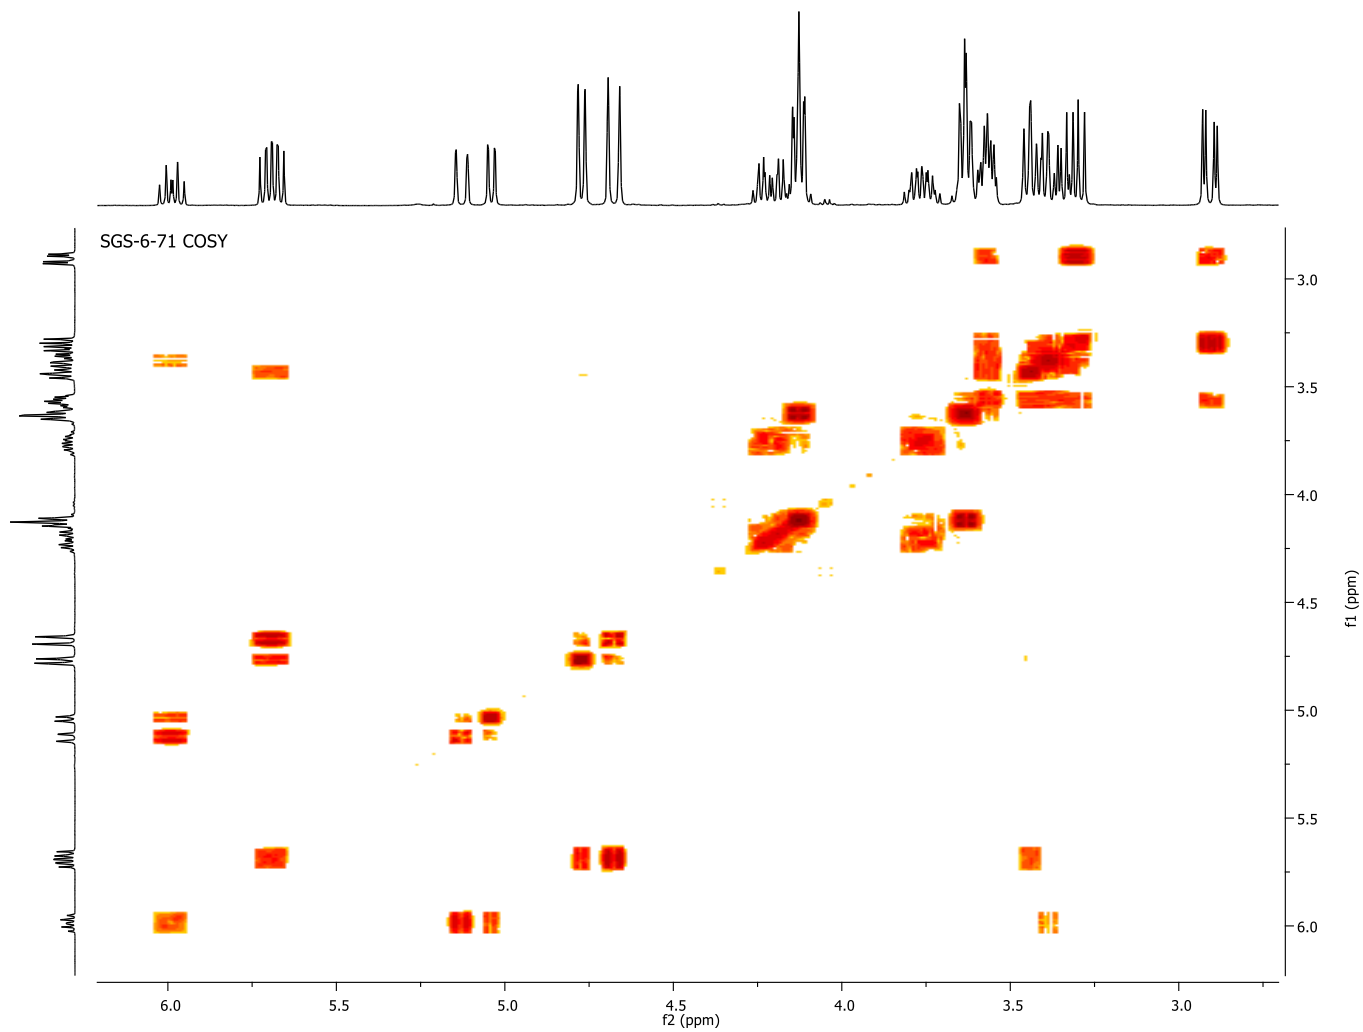

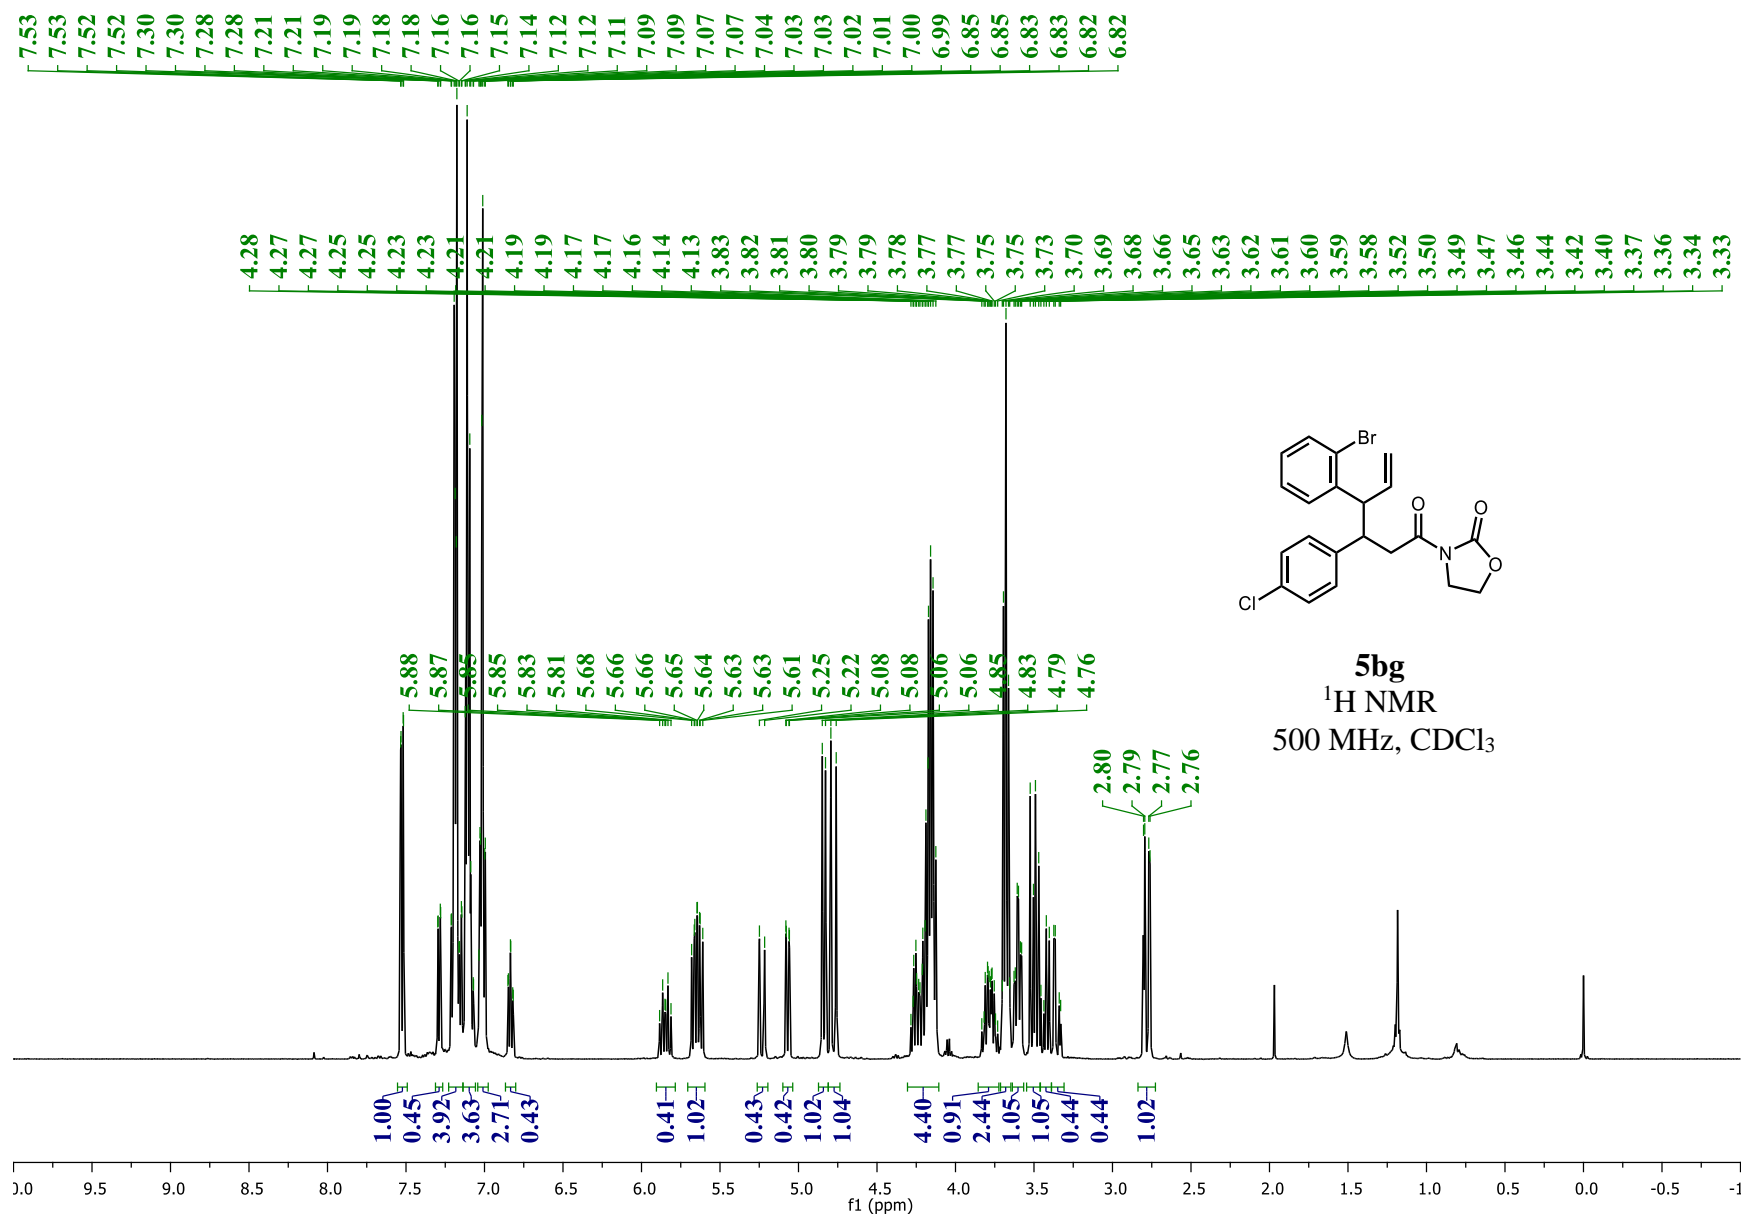

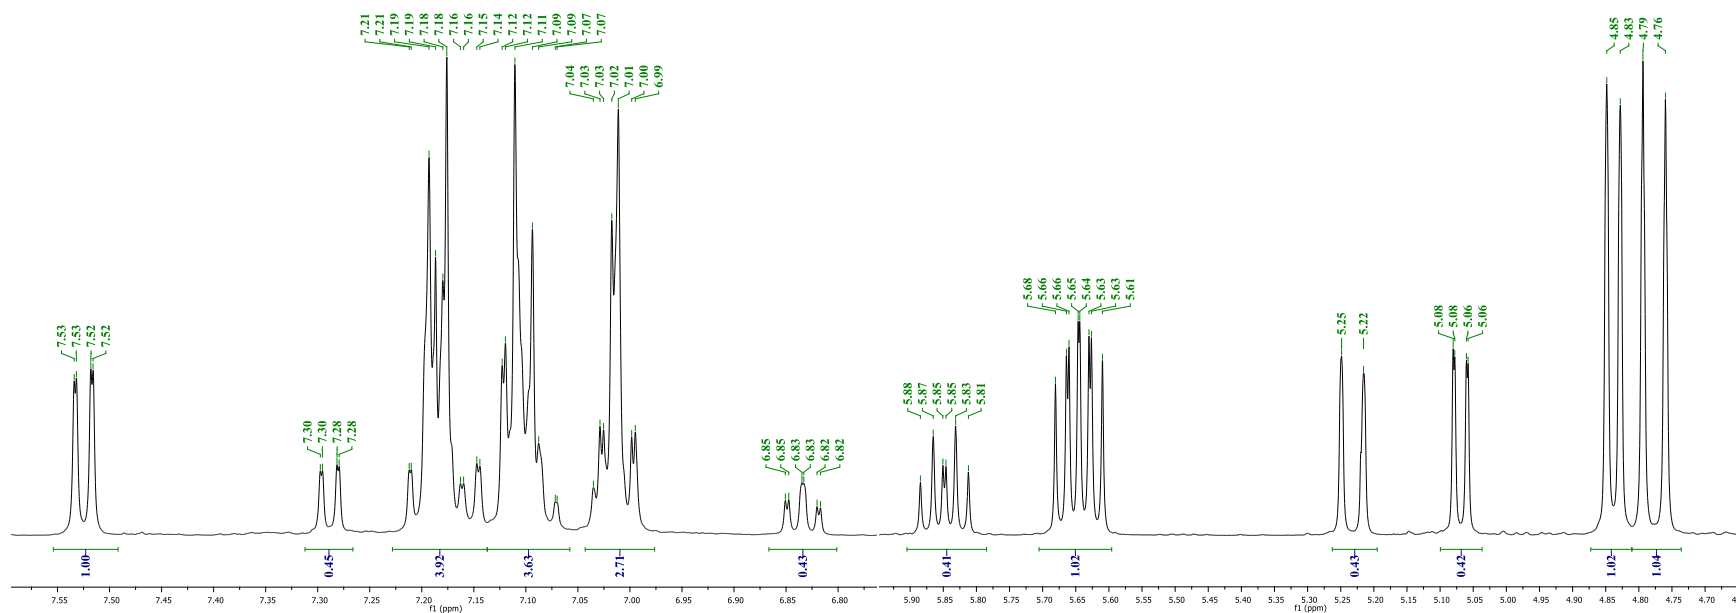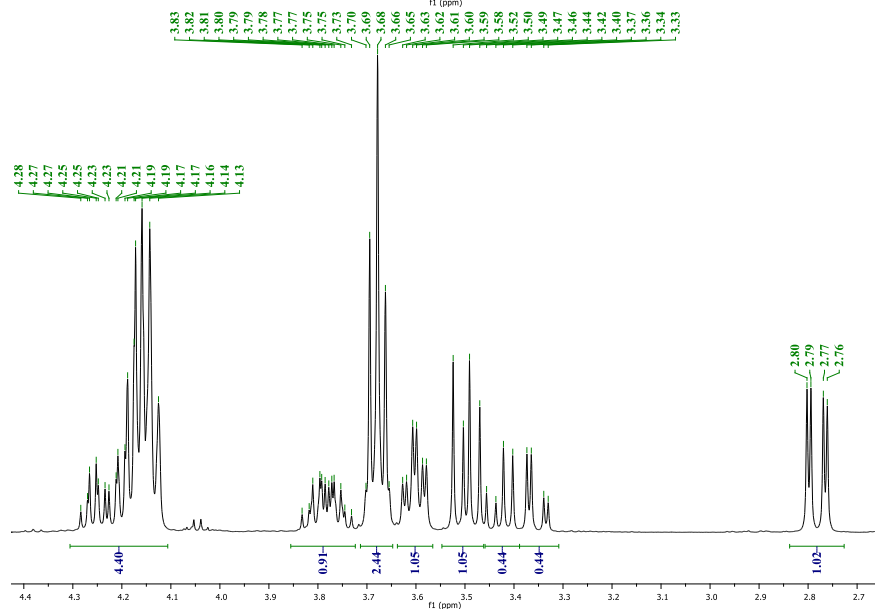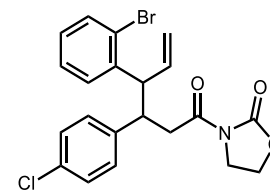

**5bg**  
 $^1\text{H}$  NMR  
 500 MHz,  $\text{CDCl}_3$

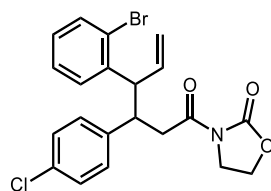

**5bg**  
<sup>13</sup>C NMR  
 126 MHz, CDCl<sub>3</sub>

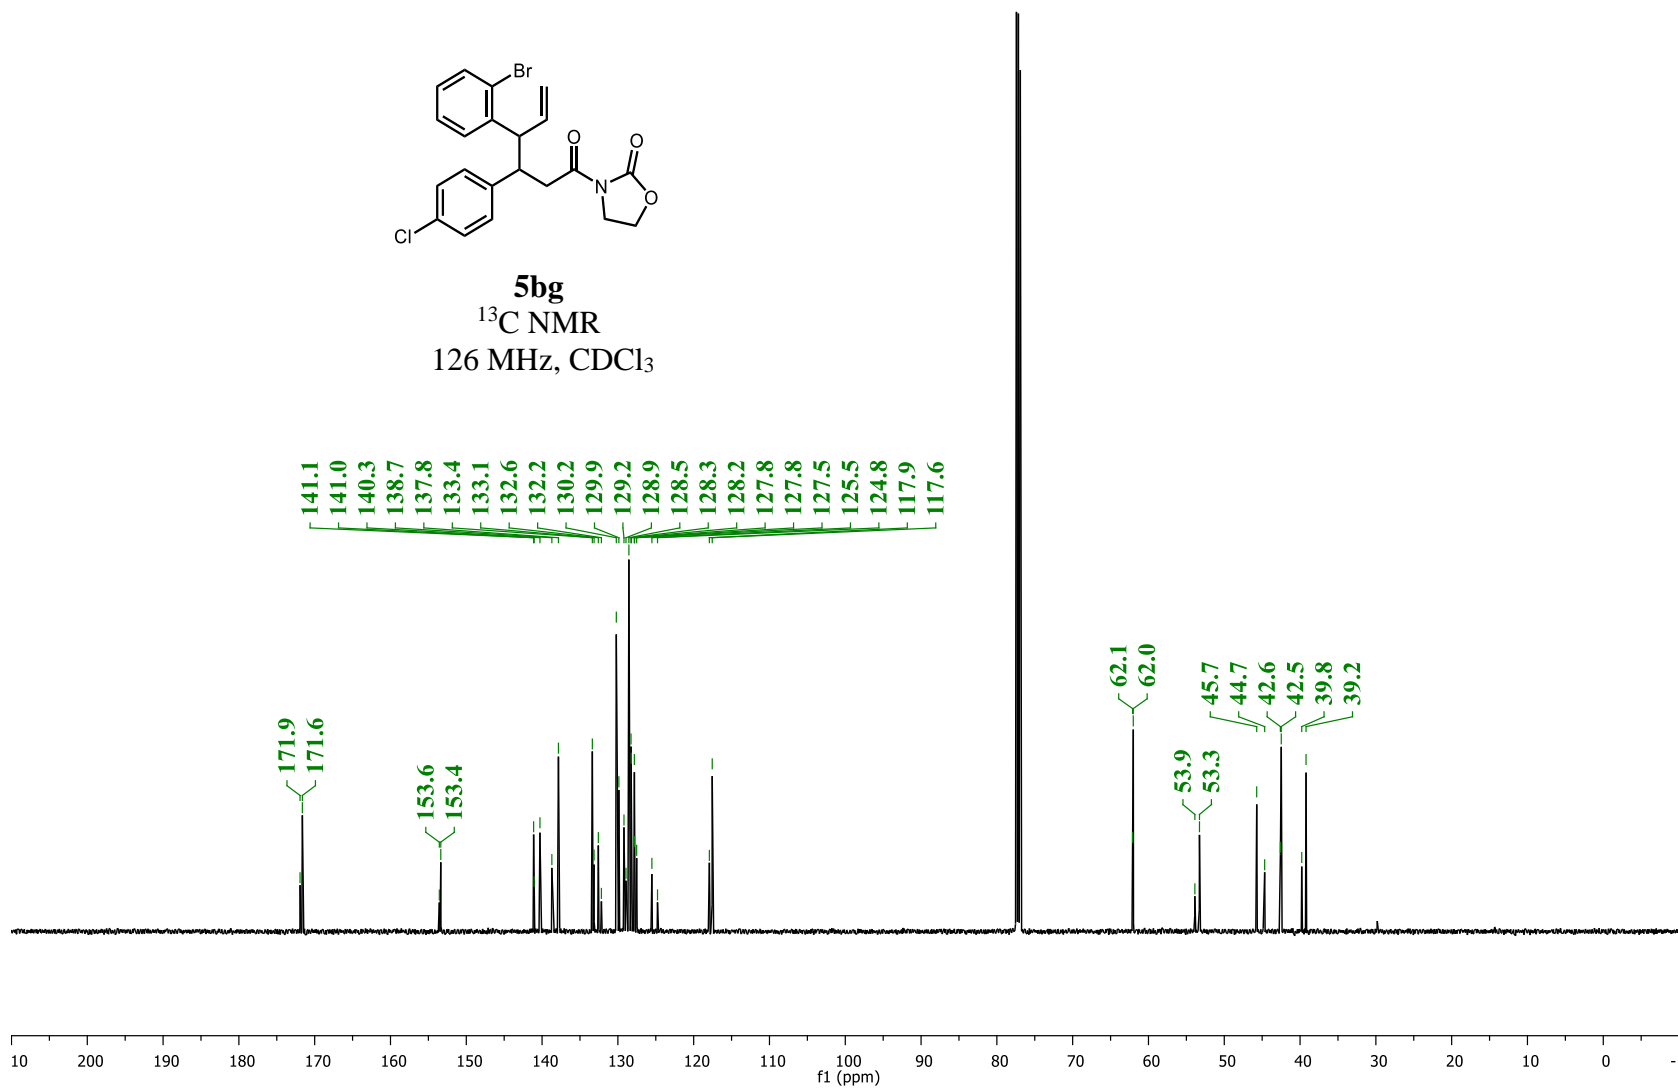

SGS-6-76 (major) H

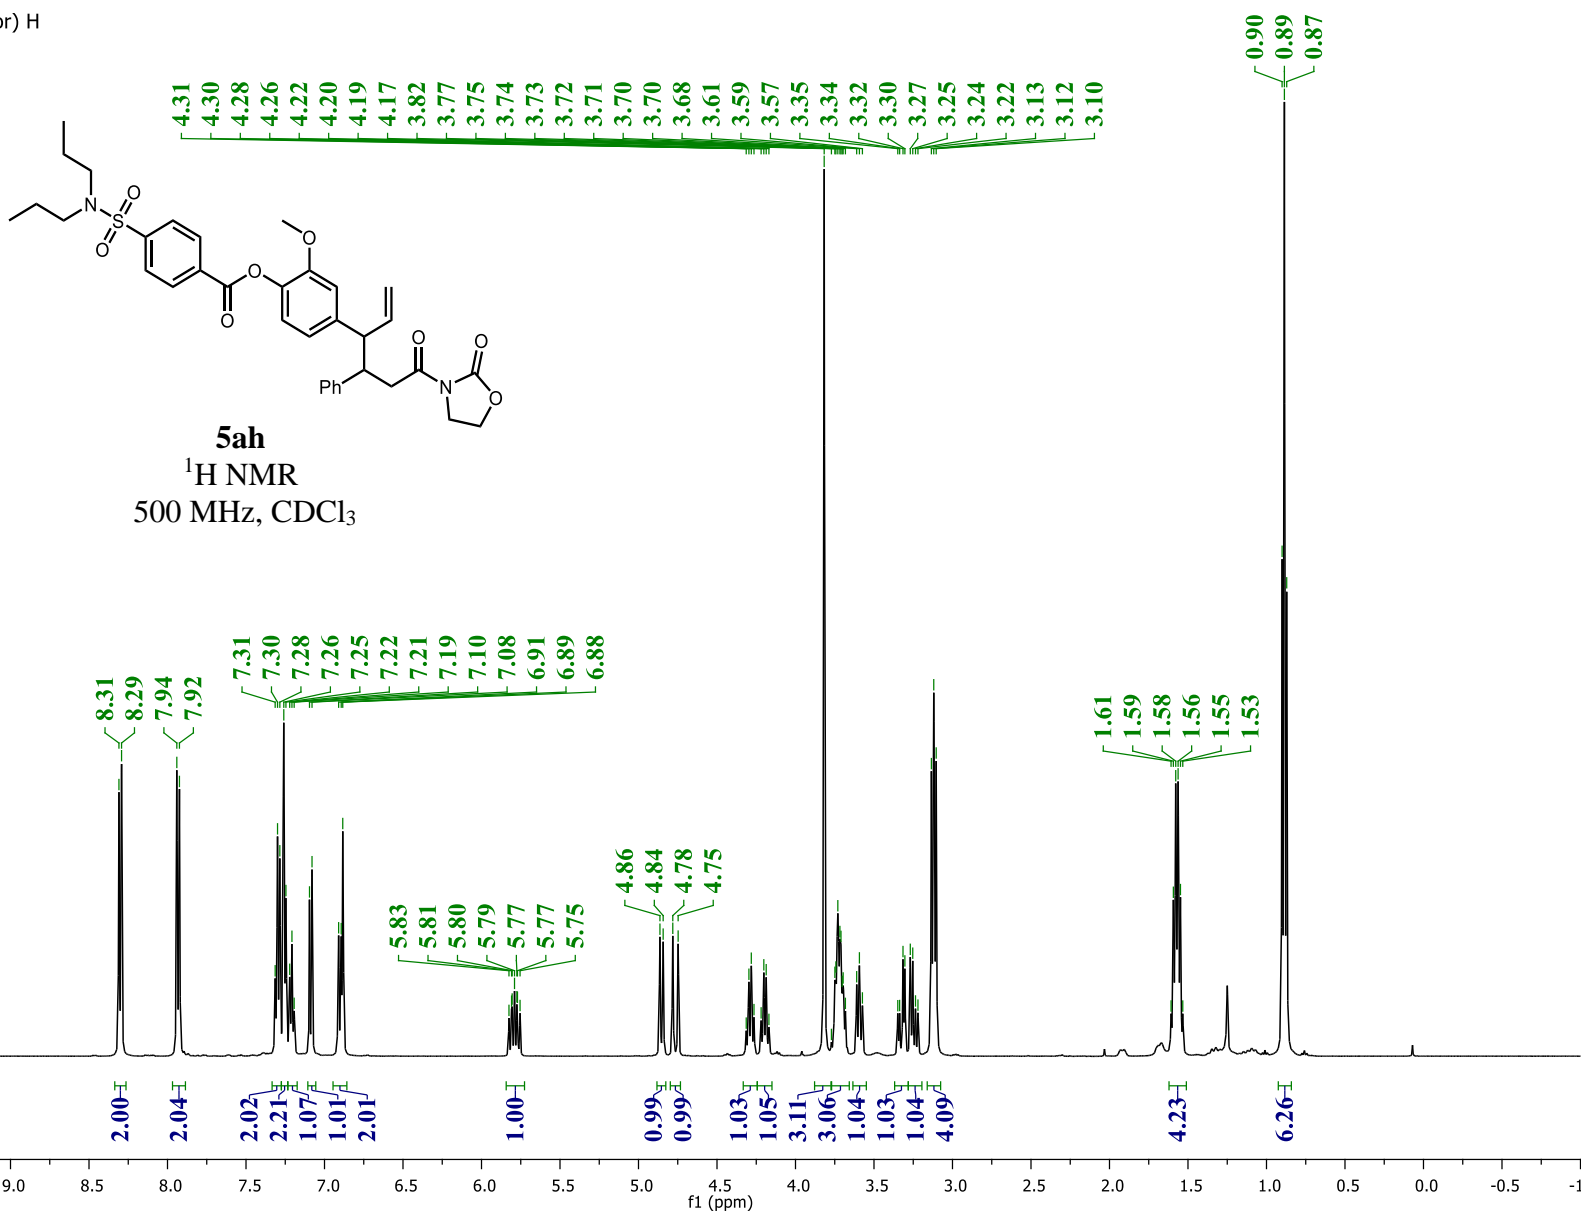

SGS-6-76 (major) H

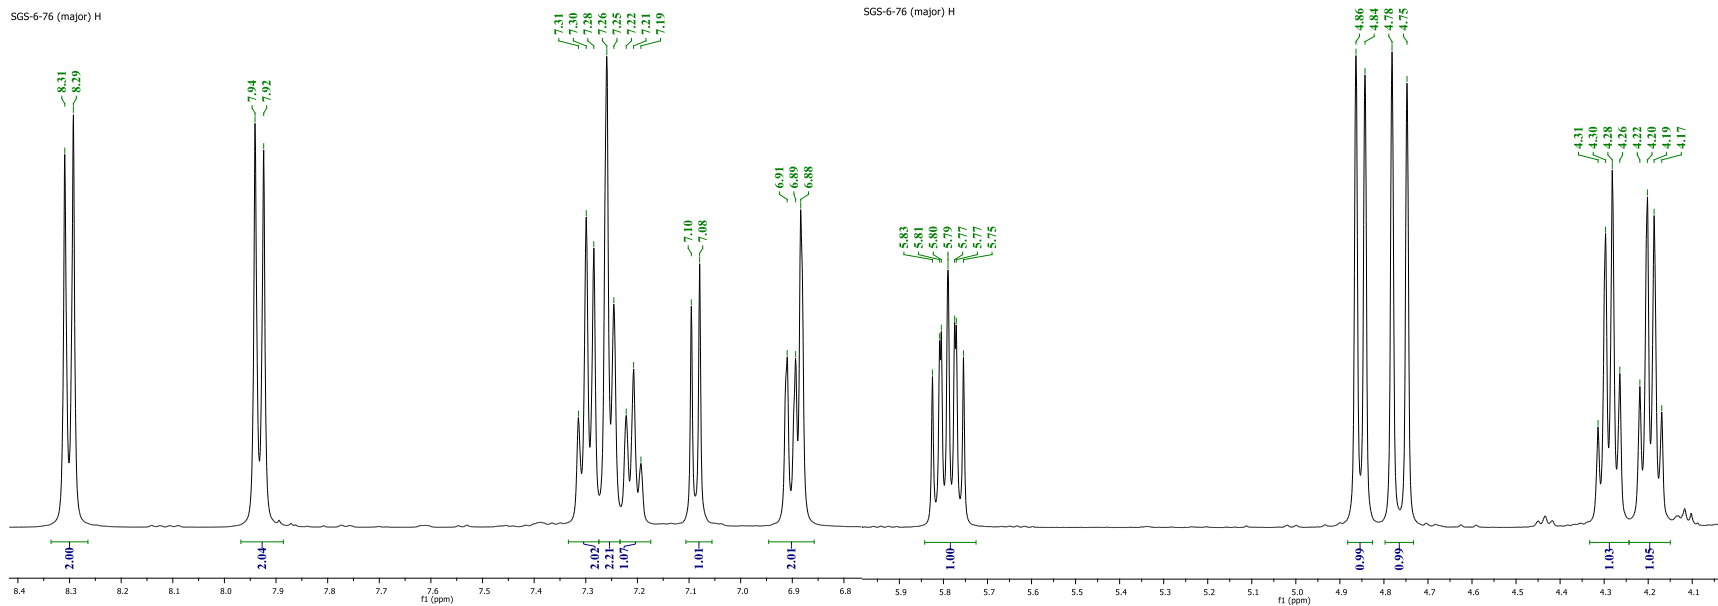

SGS-6-76 (major) H

SGS-6-76 (major) H

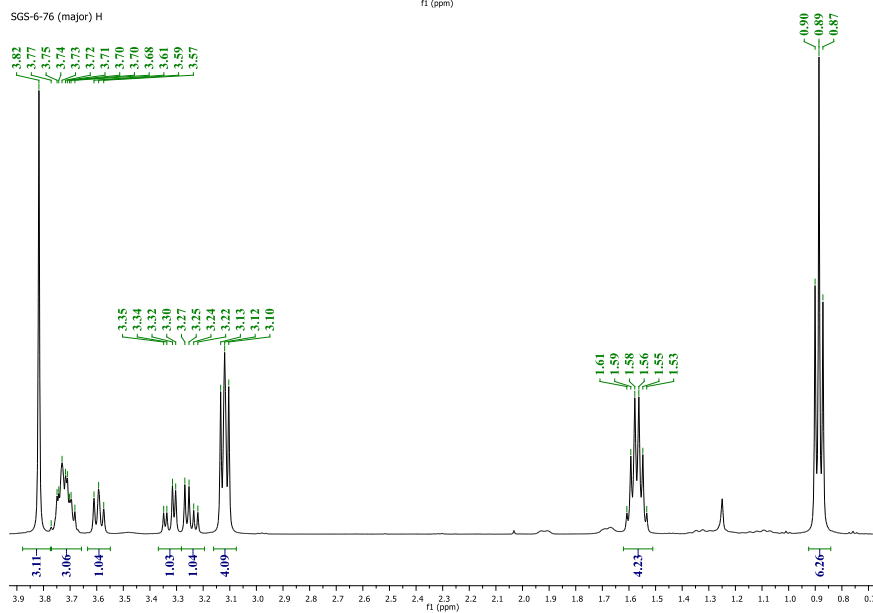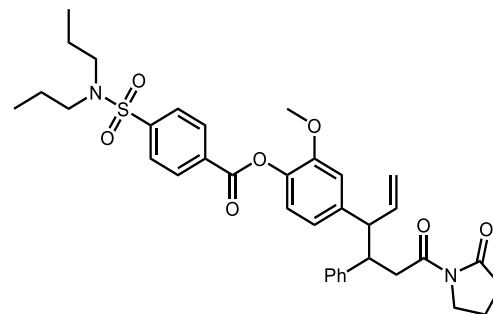

**5ah**  
 $^1\text{H}$  NMR  
 500 MHz,  $\text{CDCl}_3$



SGS-6-76 (major) C

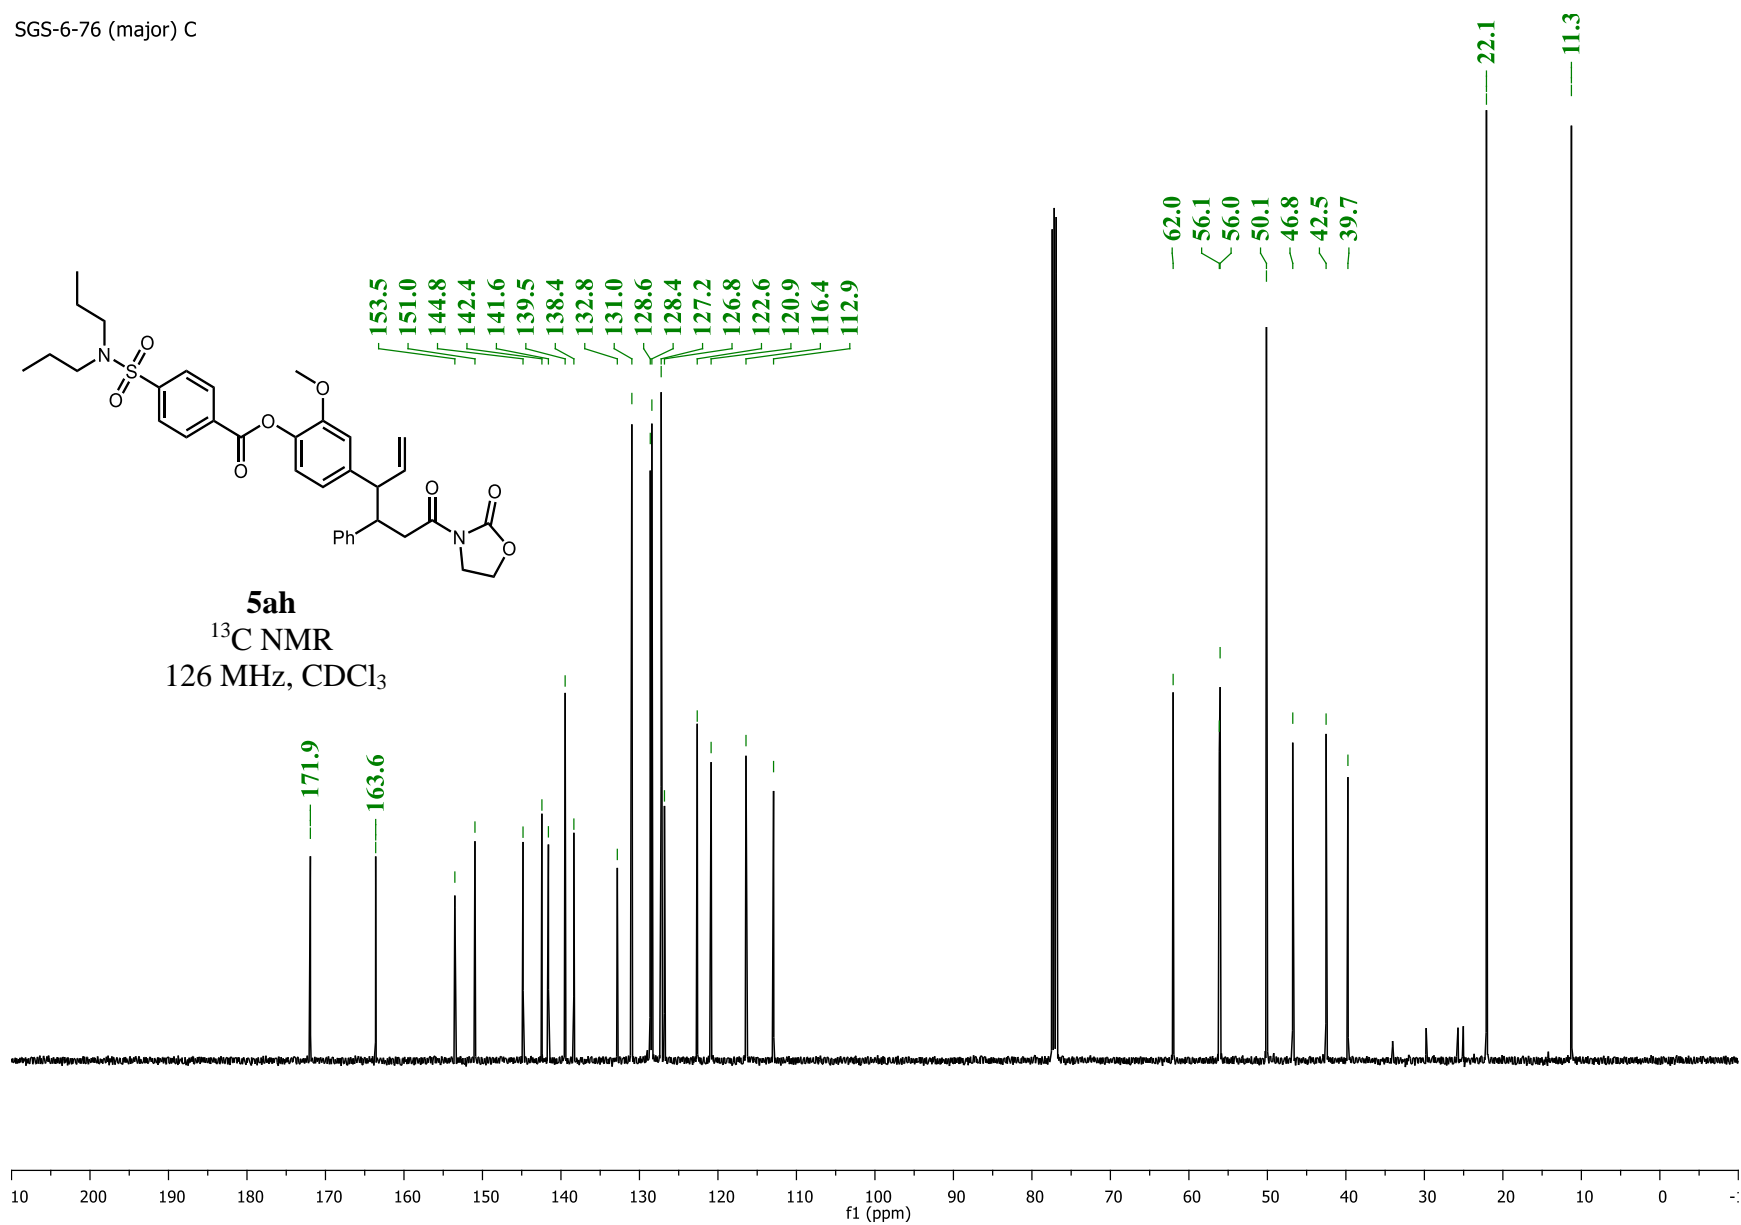



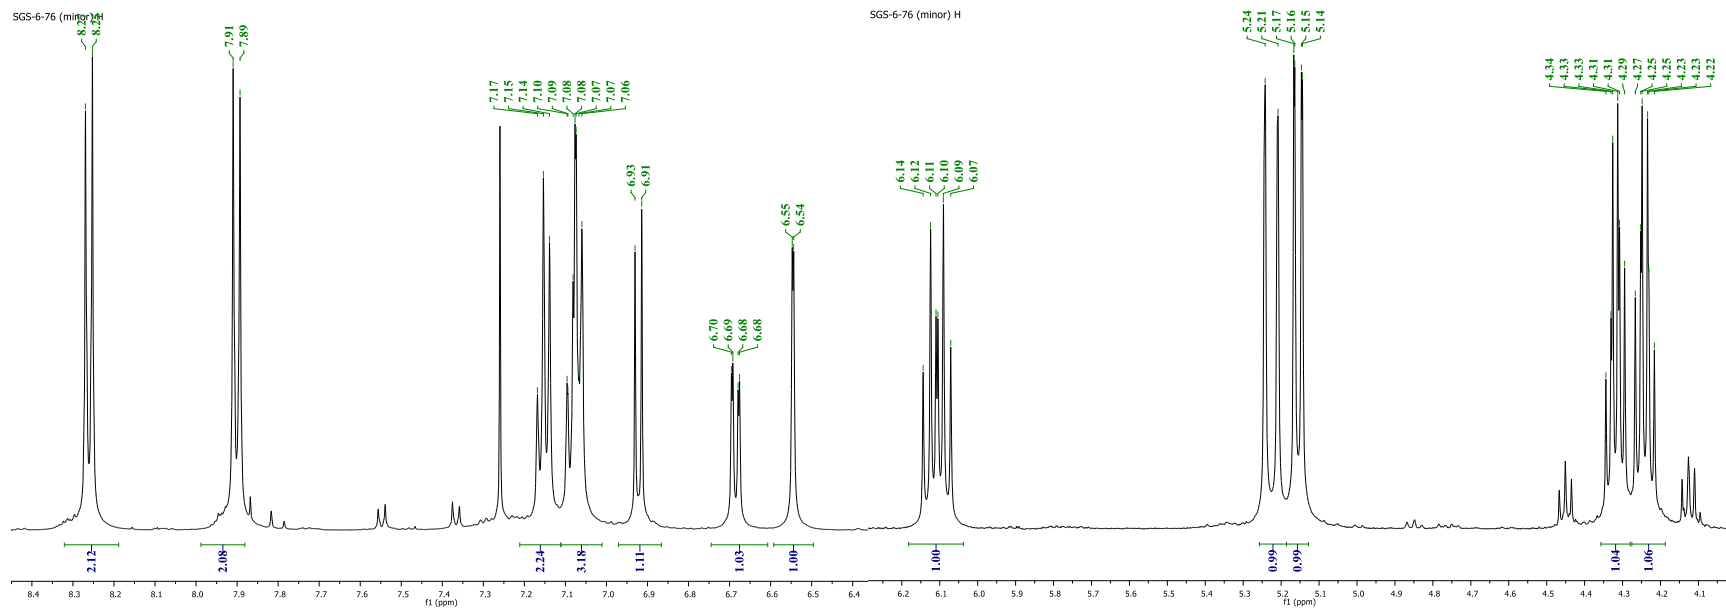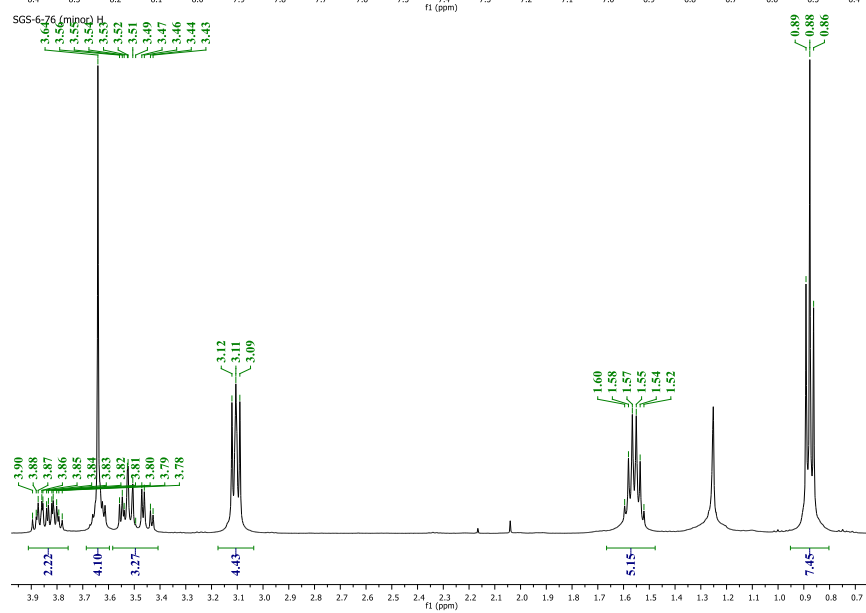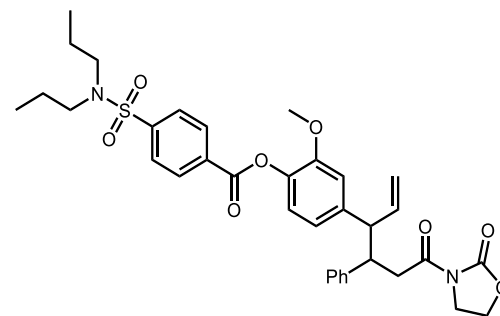

**5ah**  
<sup>1</sup>H NMR  
 500 MHz, CDCl<sub>3</sub>

SGS-6-76 (minor) C

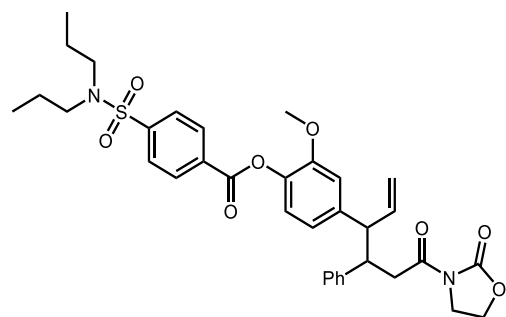

**5ah**  
<sup>13</sup>C NMR  
126 MHz, CDCl<sub>3</sub>

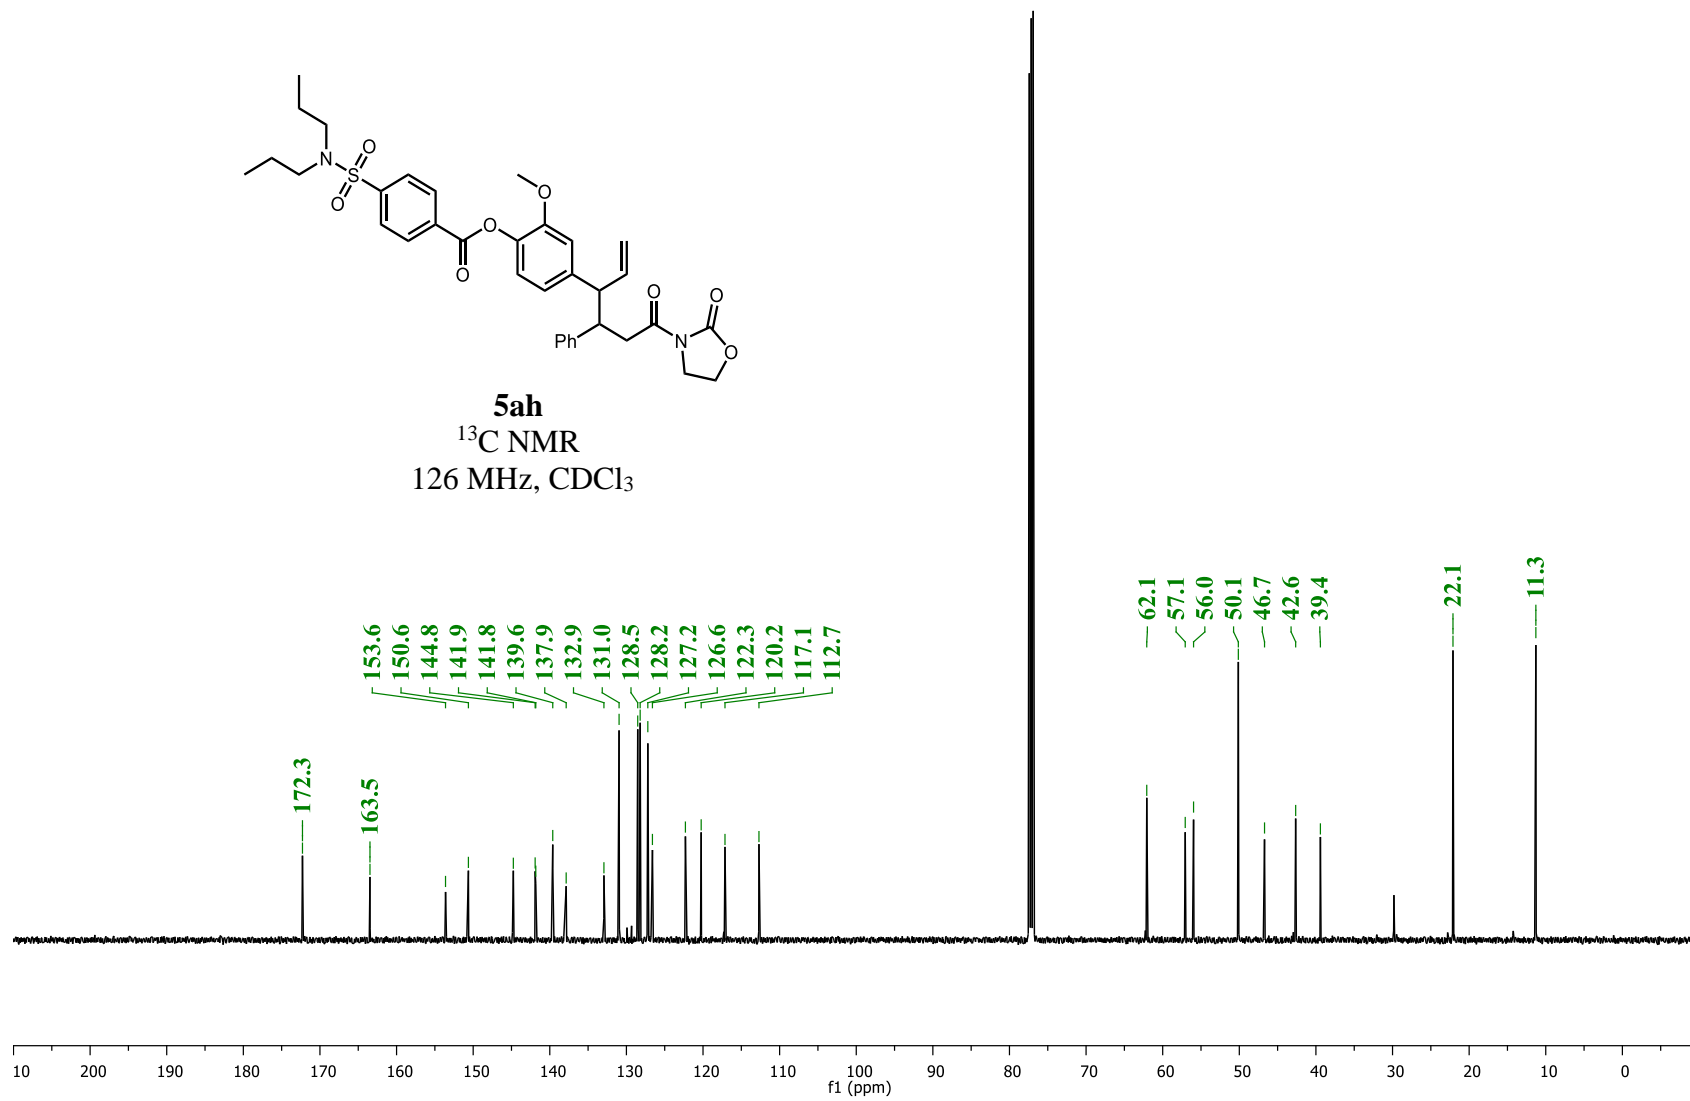

SGS-7-8 H

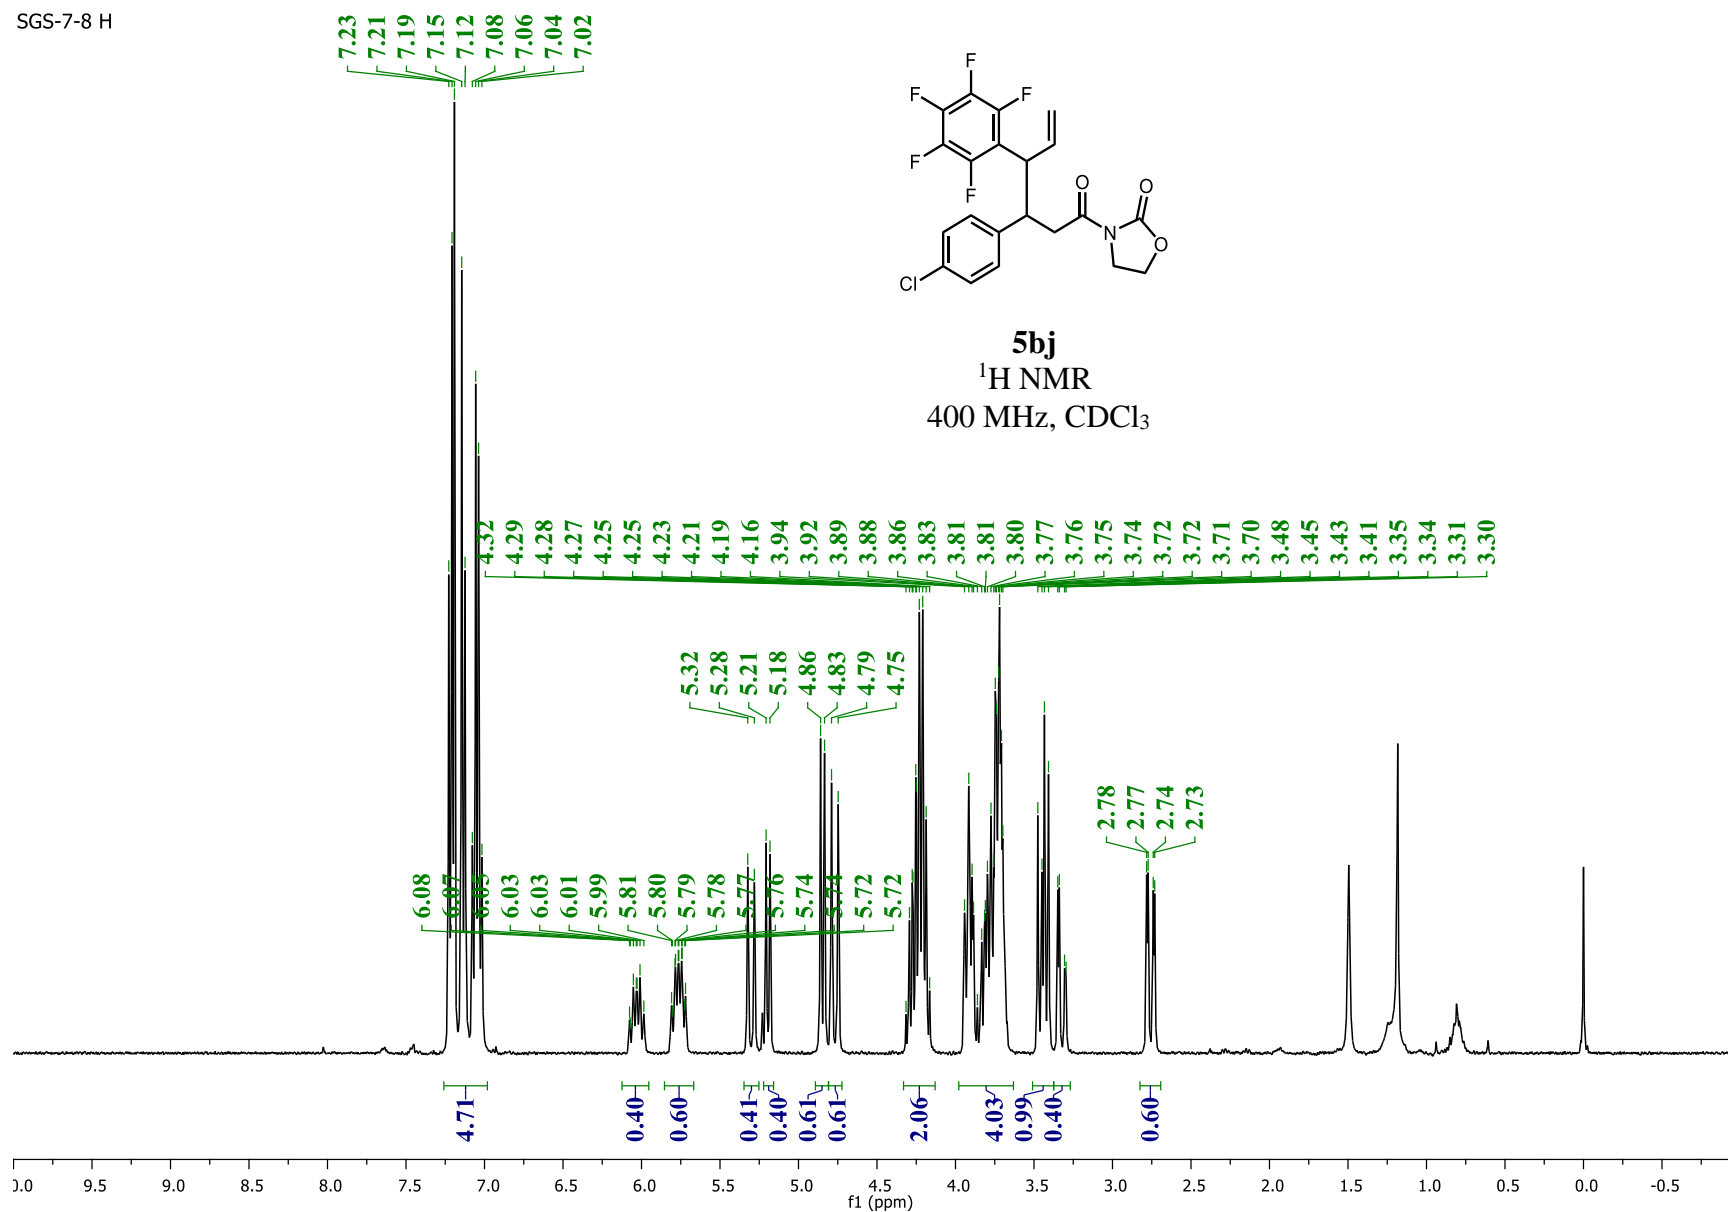

SGS-7-8 H

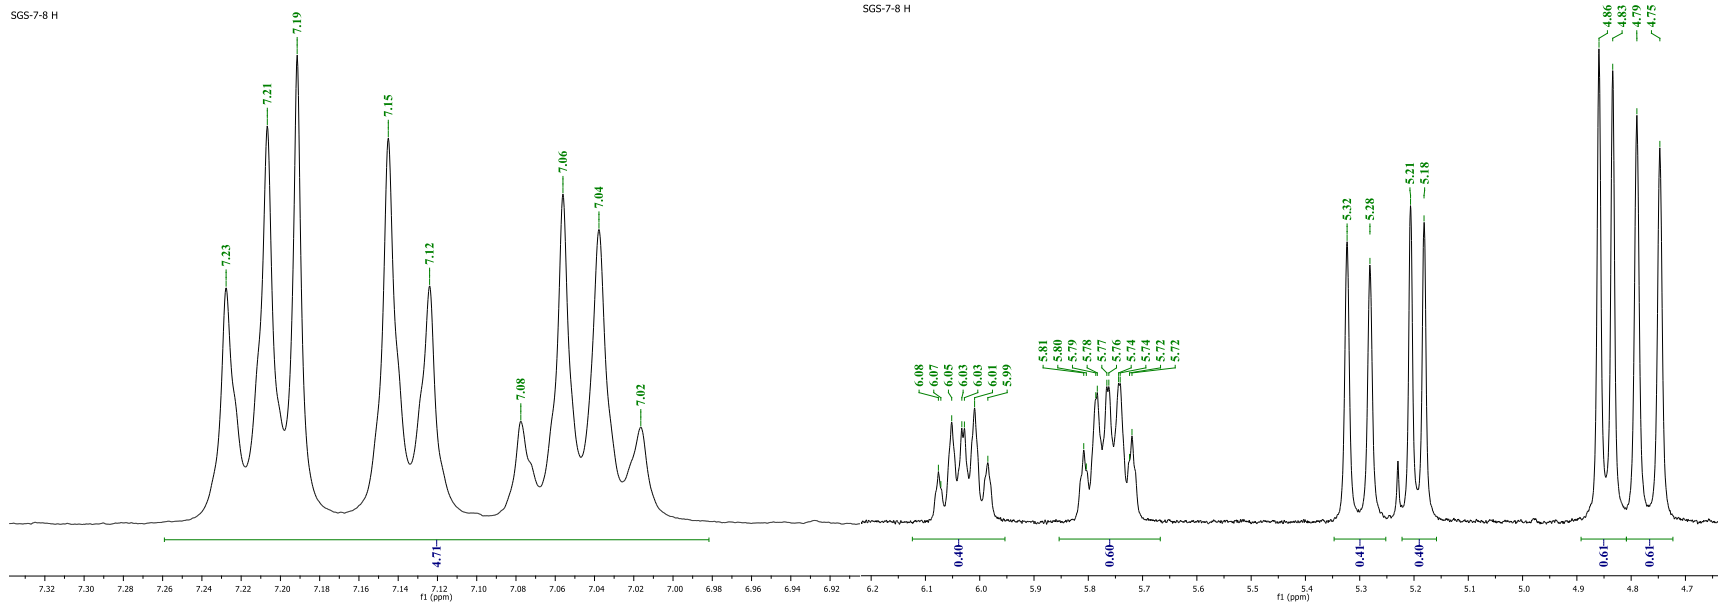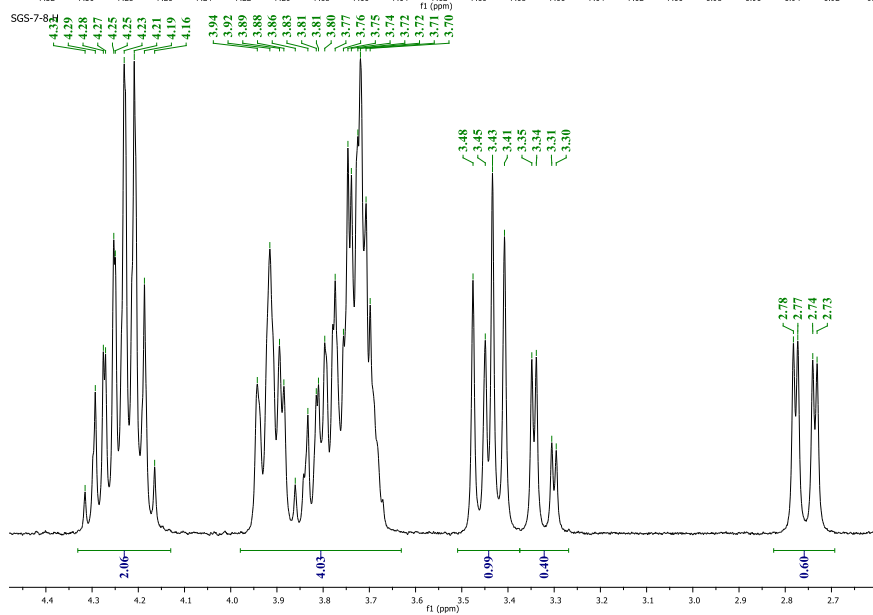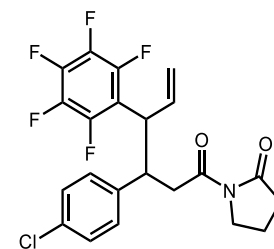

**5bj**  
<sup>1</sup>H NMR  
 400 MHz, CDCl<sub>3</sub>

SGS-7-8 C

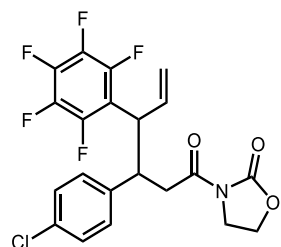

**5bj**  
<sup>13</sup>C NMR  
126 MHz, CDCl<sub>3</sub>

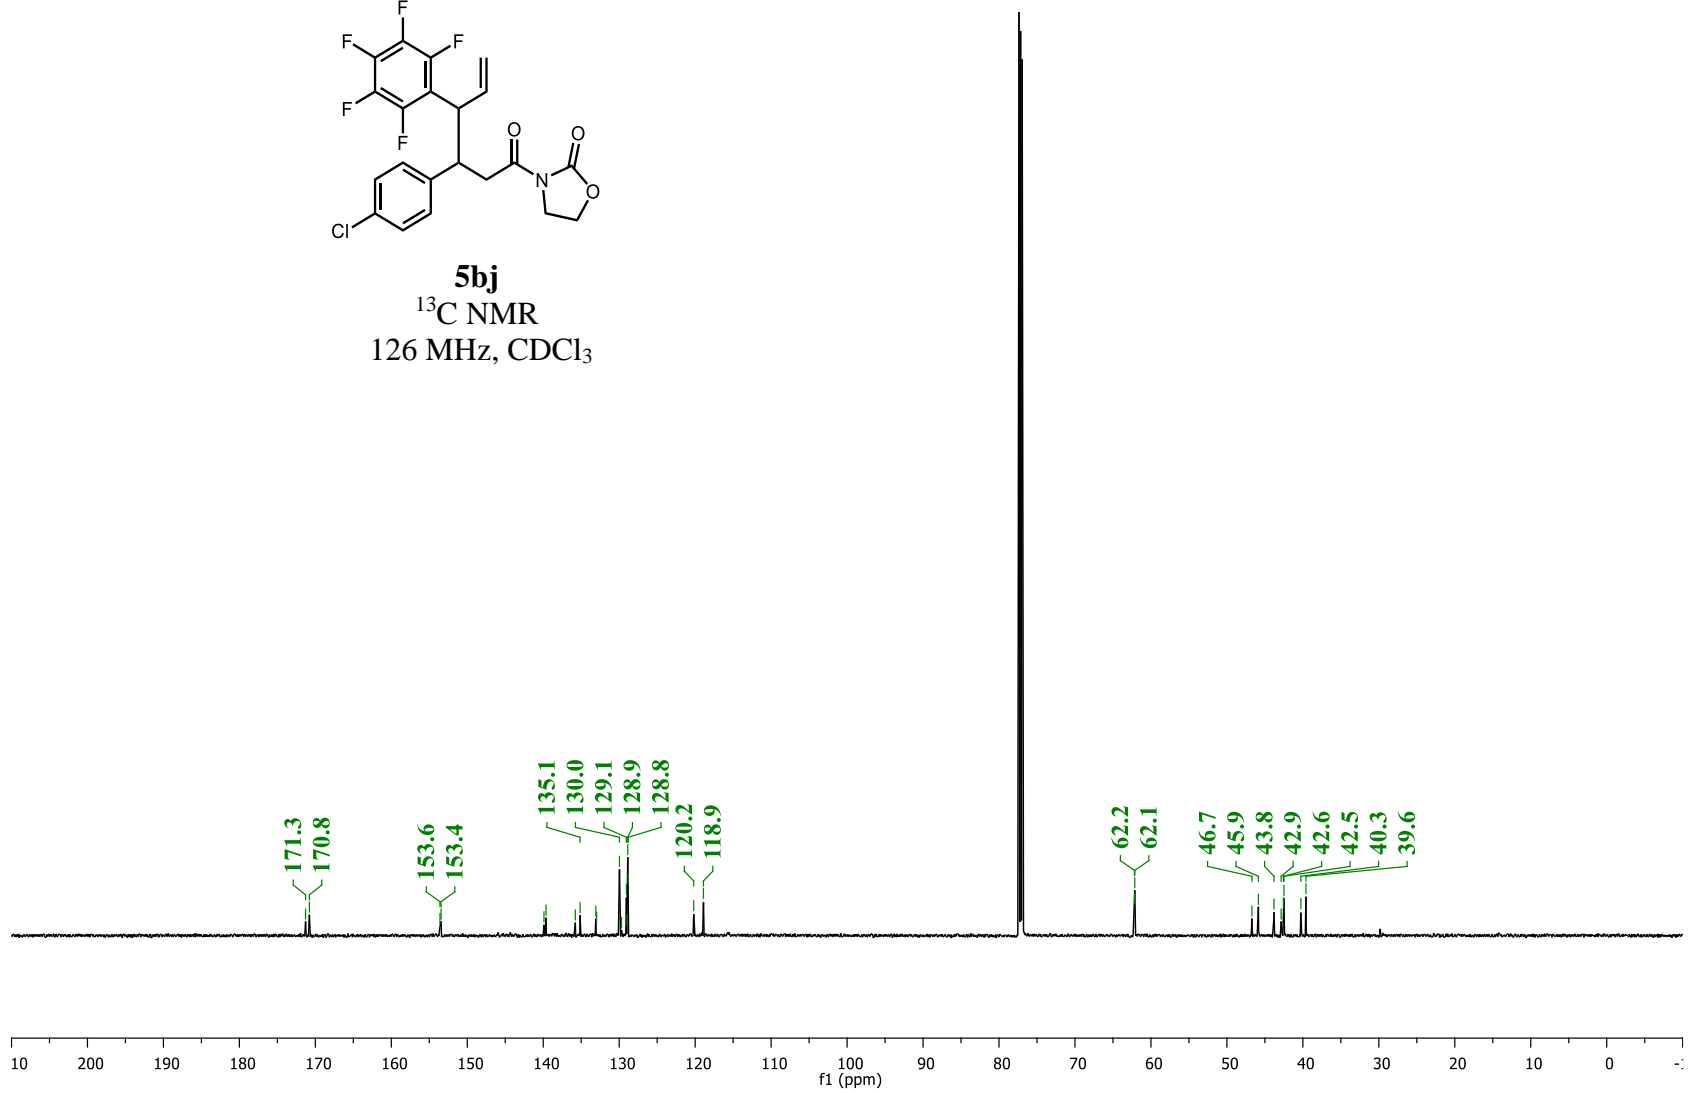

### 7.3 NMR spectra: Phthalimide Scope

SGS-5-144 H

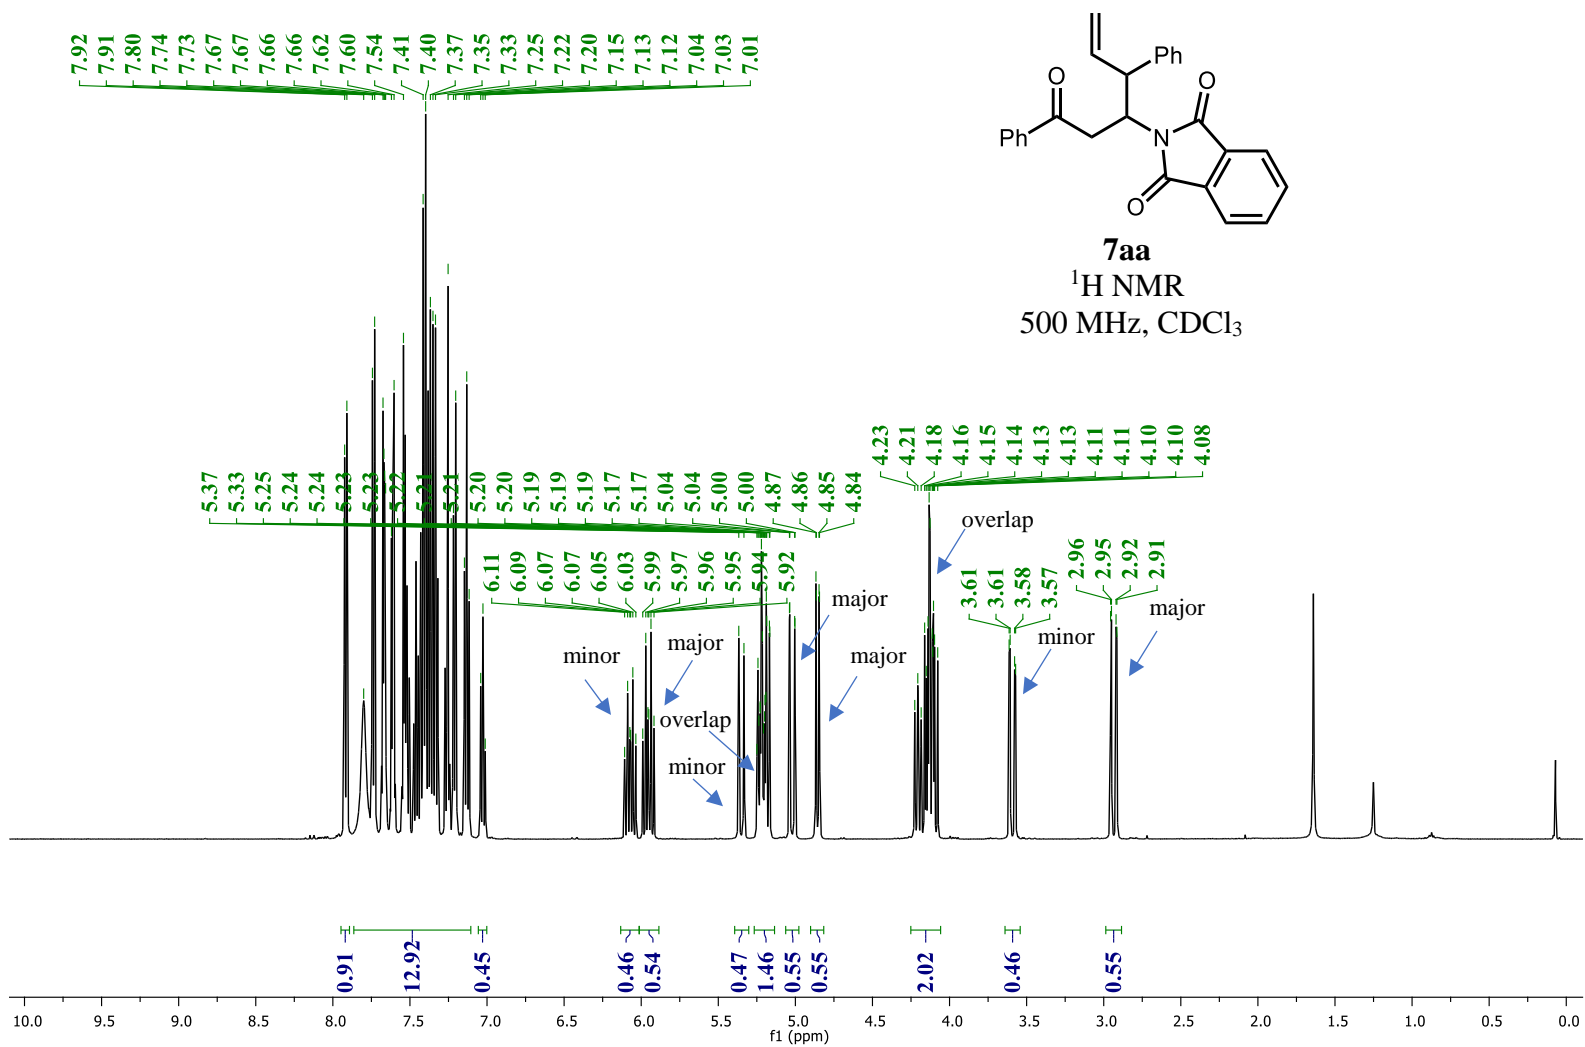



SG5-5-144 H

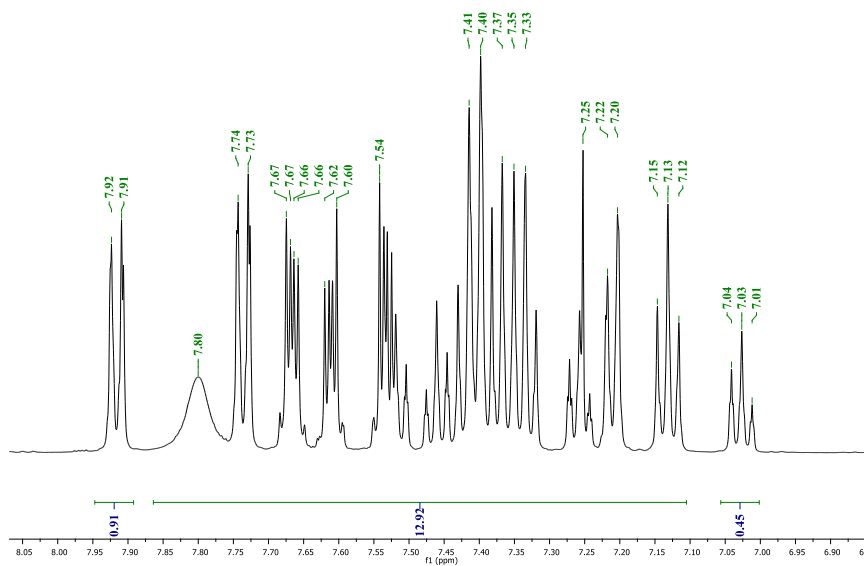

SG5-5-144 H

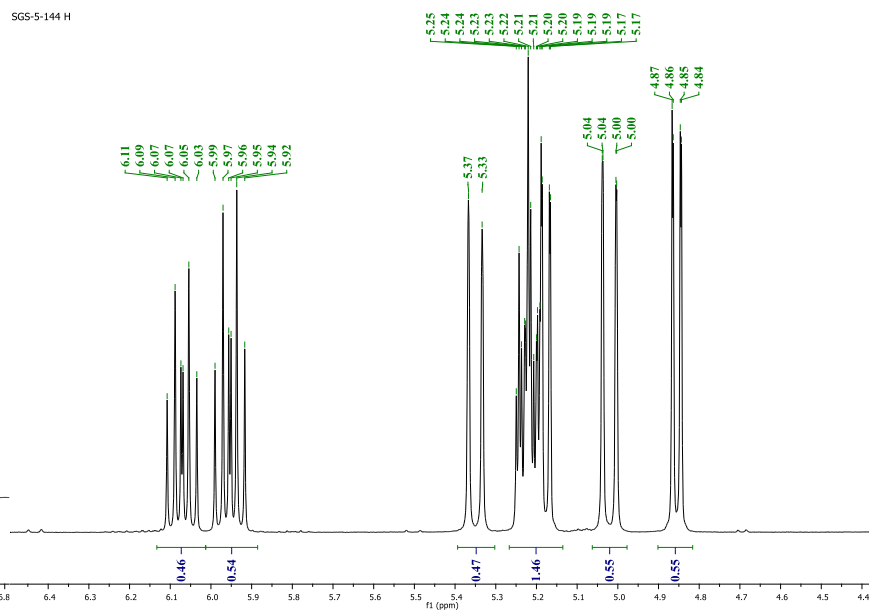

SG5-5-144 H

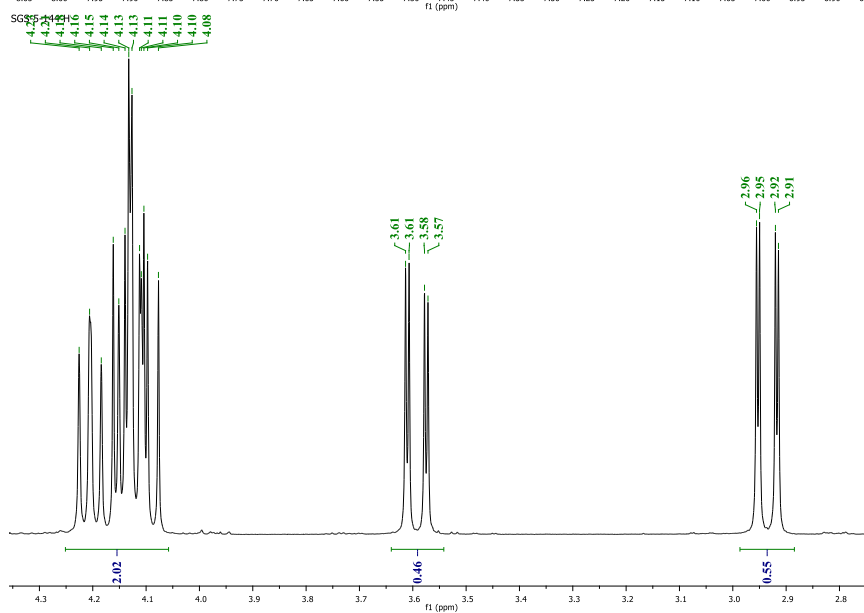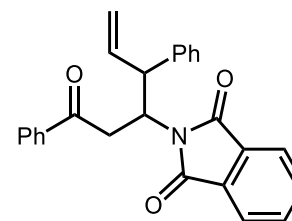**7aa**

$^1\text{H}$  NMR  
500 MHz,  $\text{CDCl}_3$

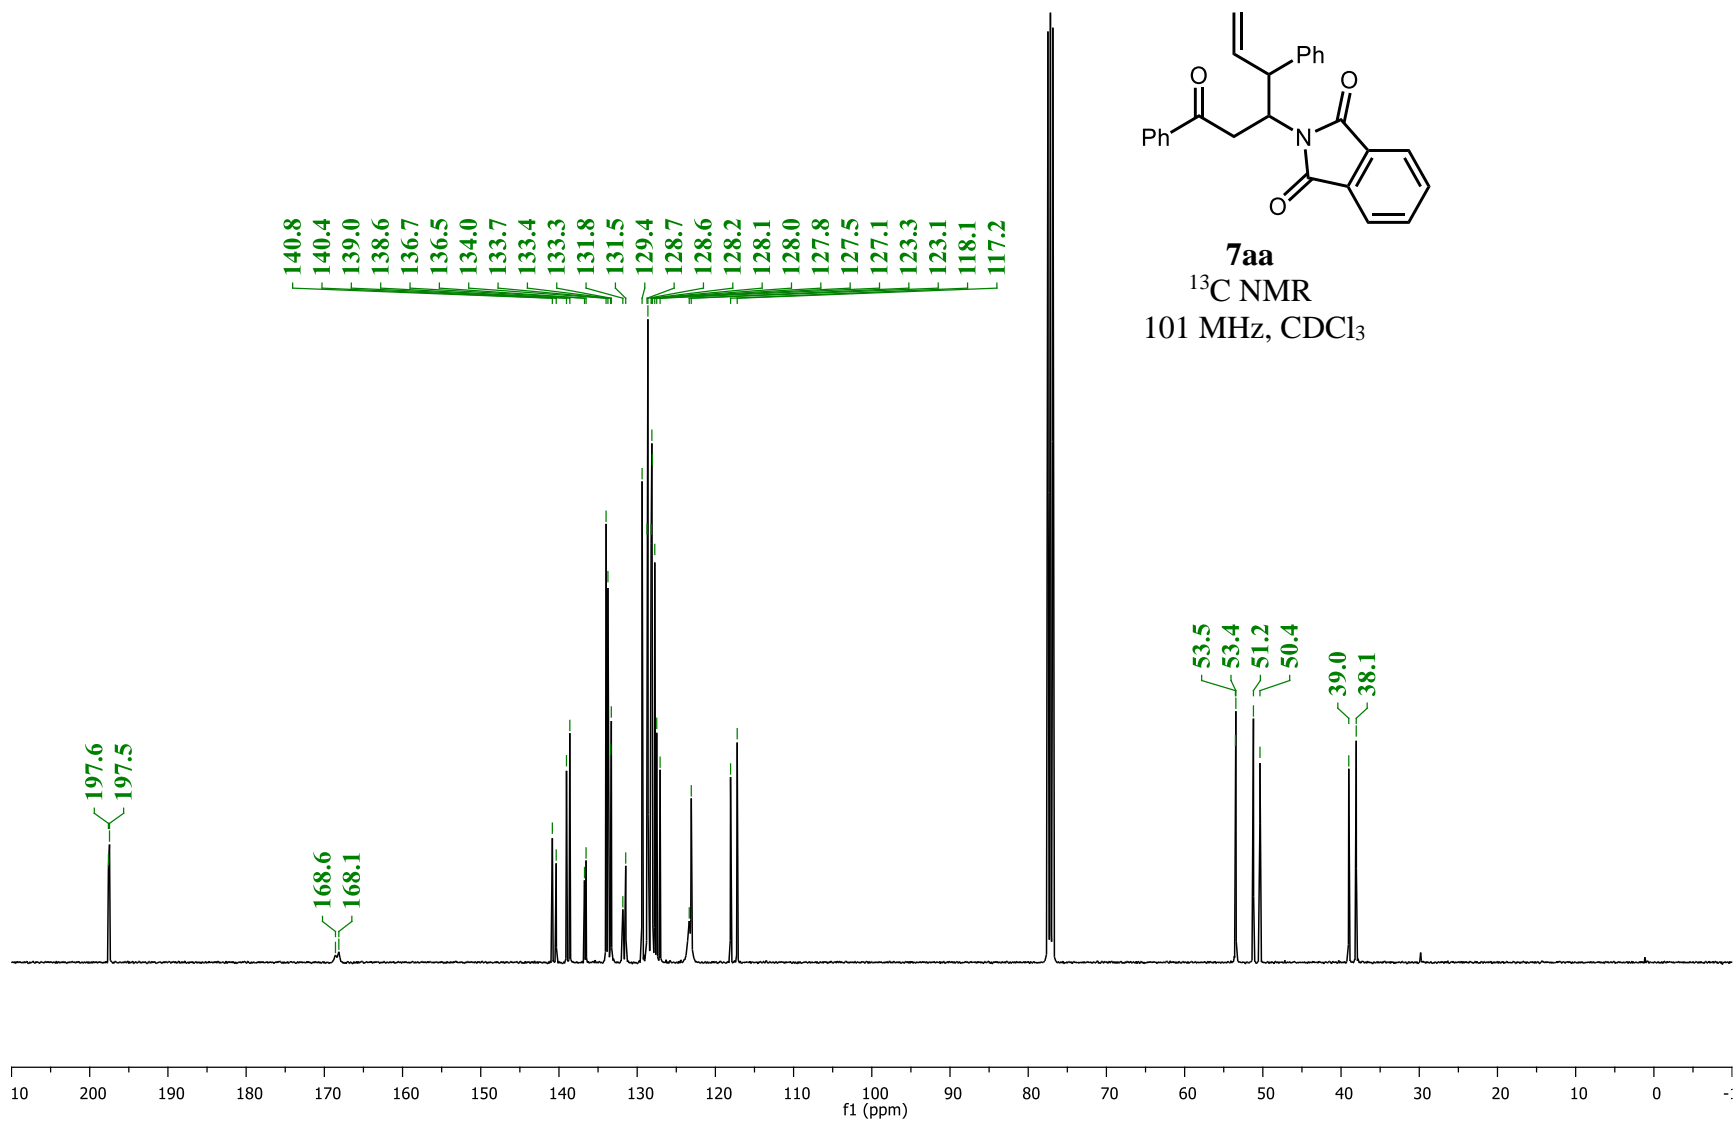

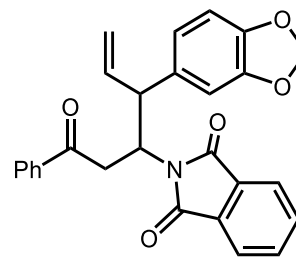**7ae**

$^1\text{H NMR}$   
500 MHz,  $\text{CDCl}_3$

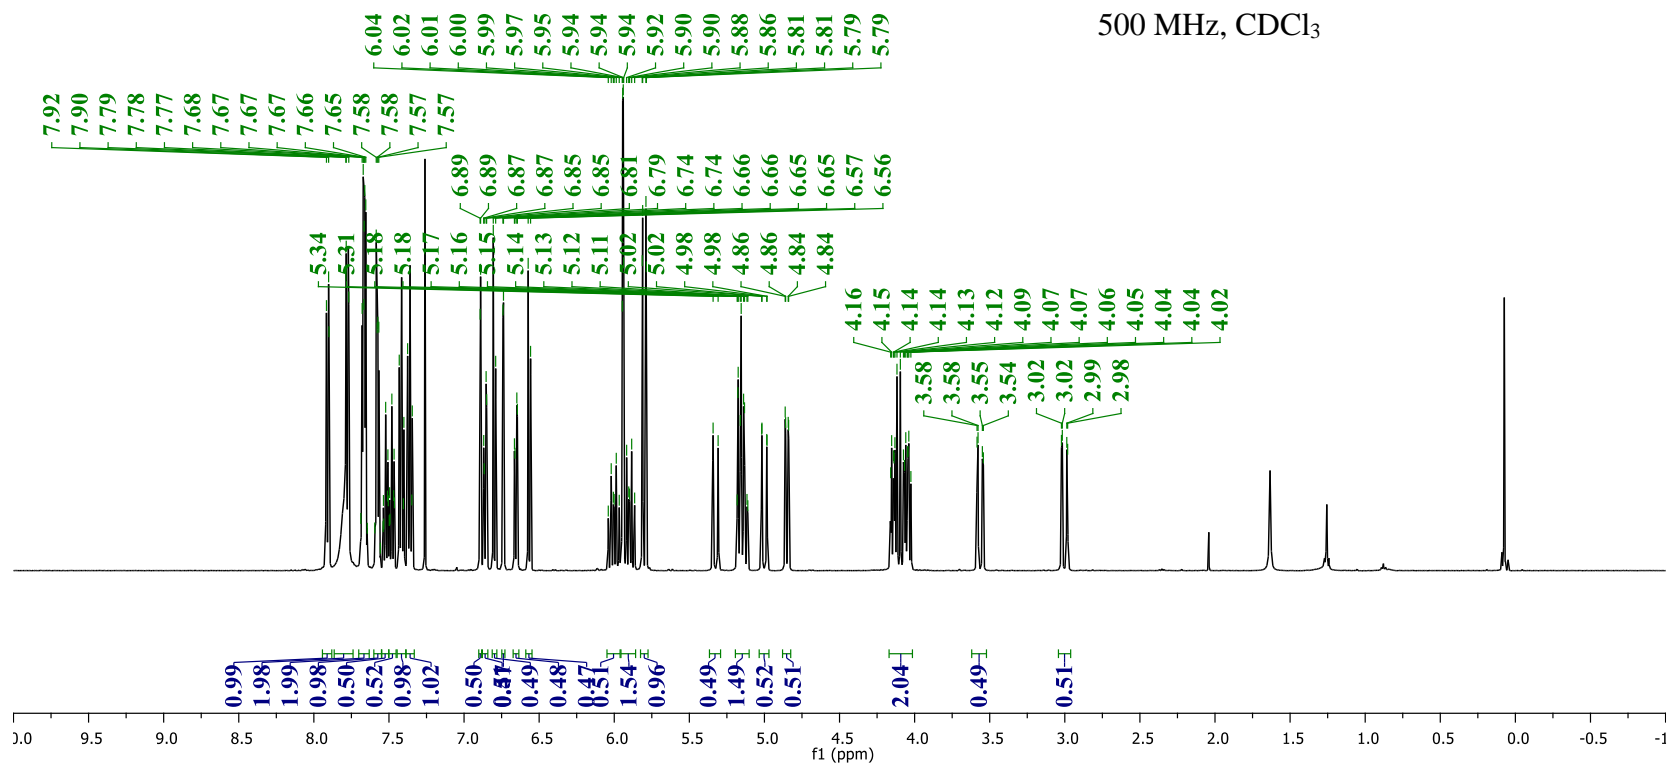

SG5-6-1-H

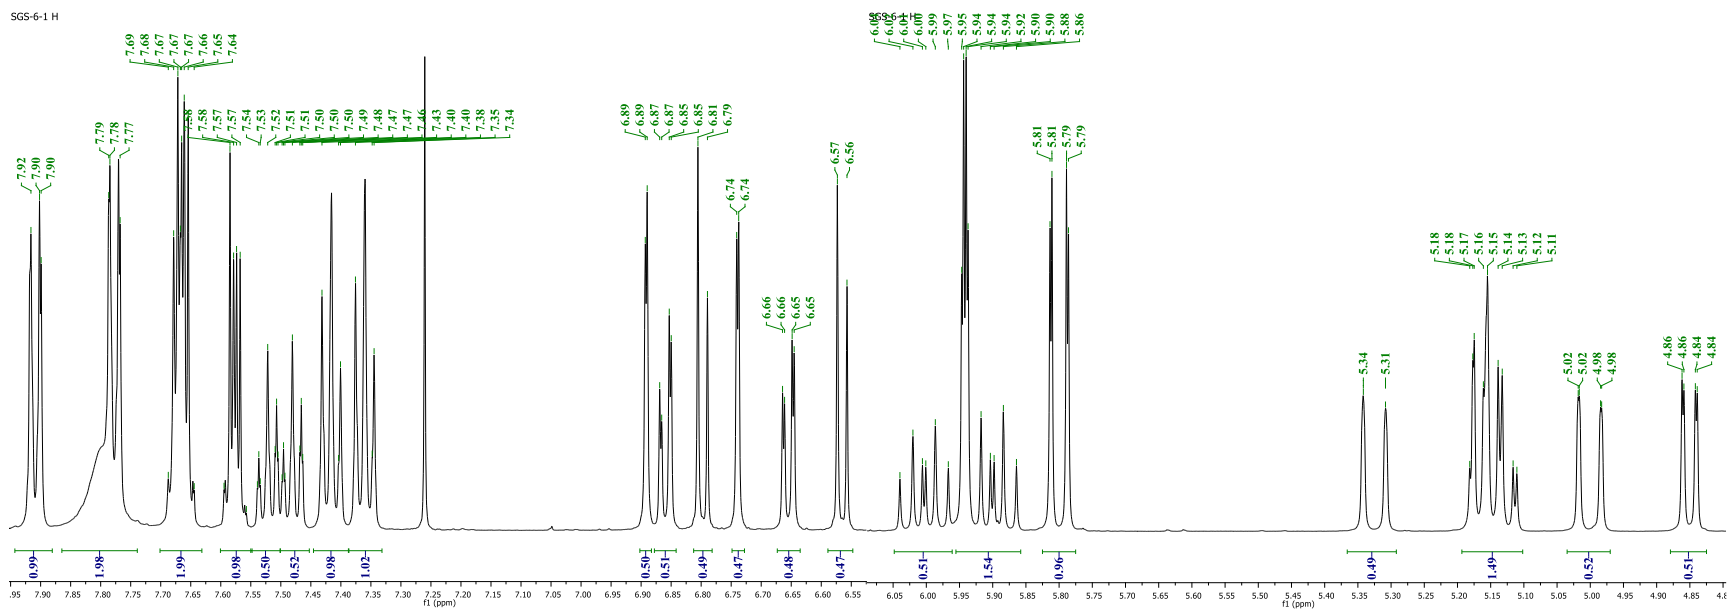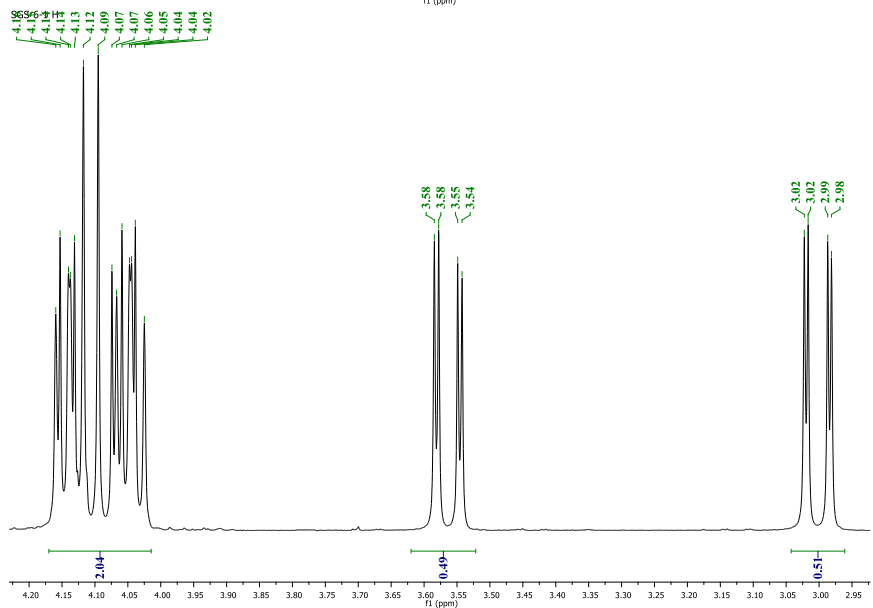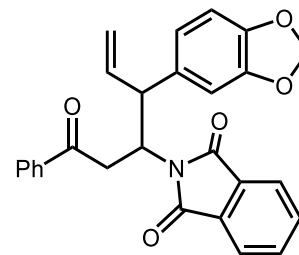

**7ae**  
<sup>1</sup>H NMR  
 500 MHz, CDCl<sub>3</sub>

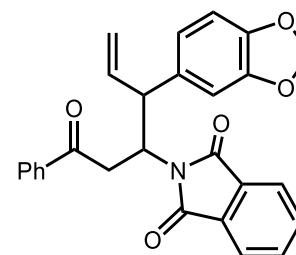

**7ae**

<sup>13</sup>C NMR

126 MHz, CDCl<sub>3</sub>

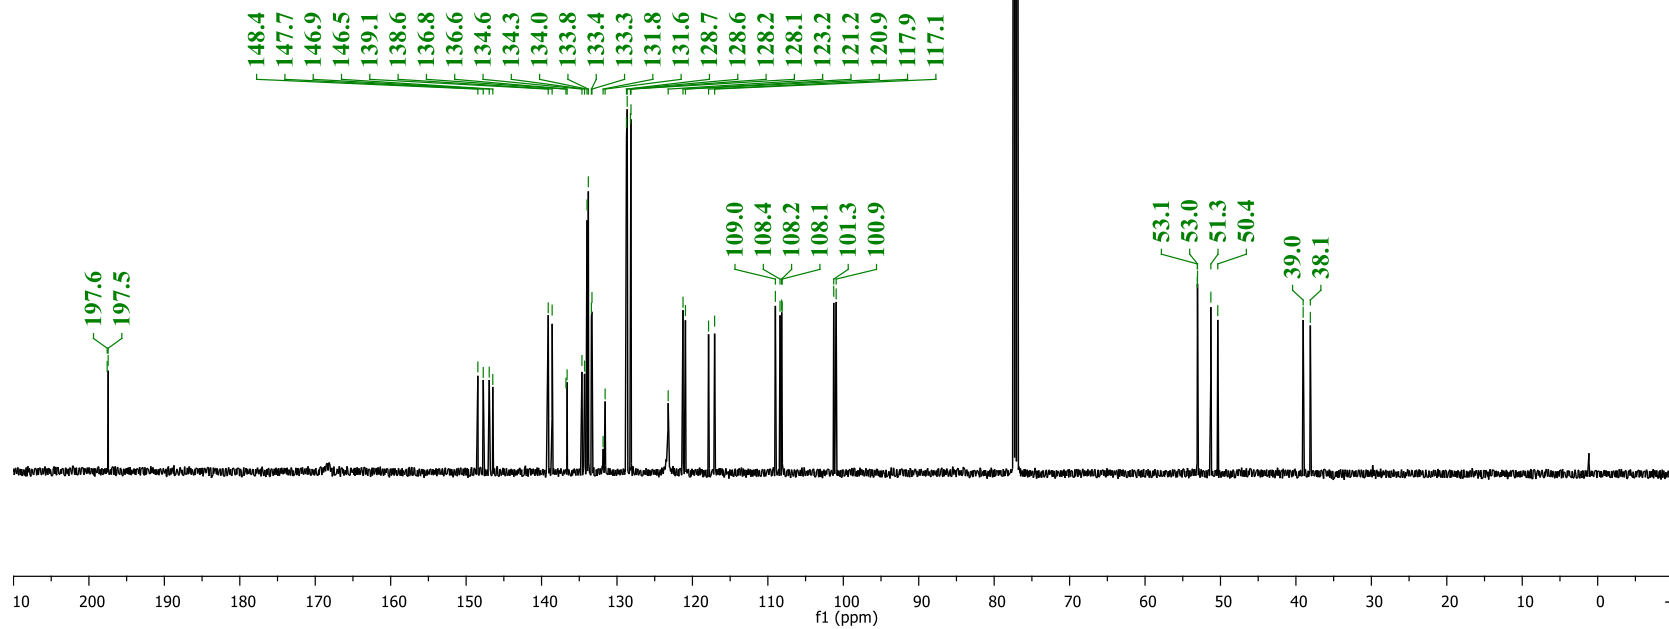



SGS-6-5 H

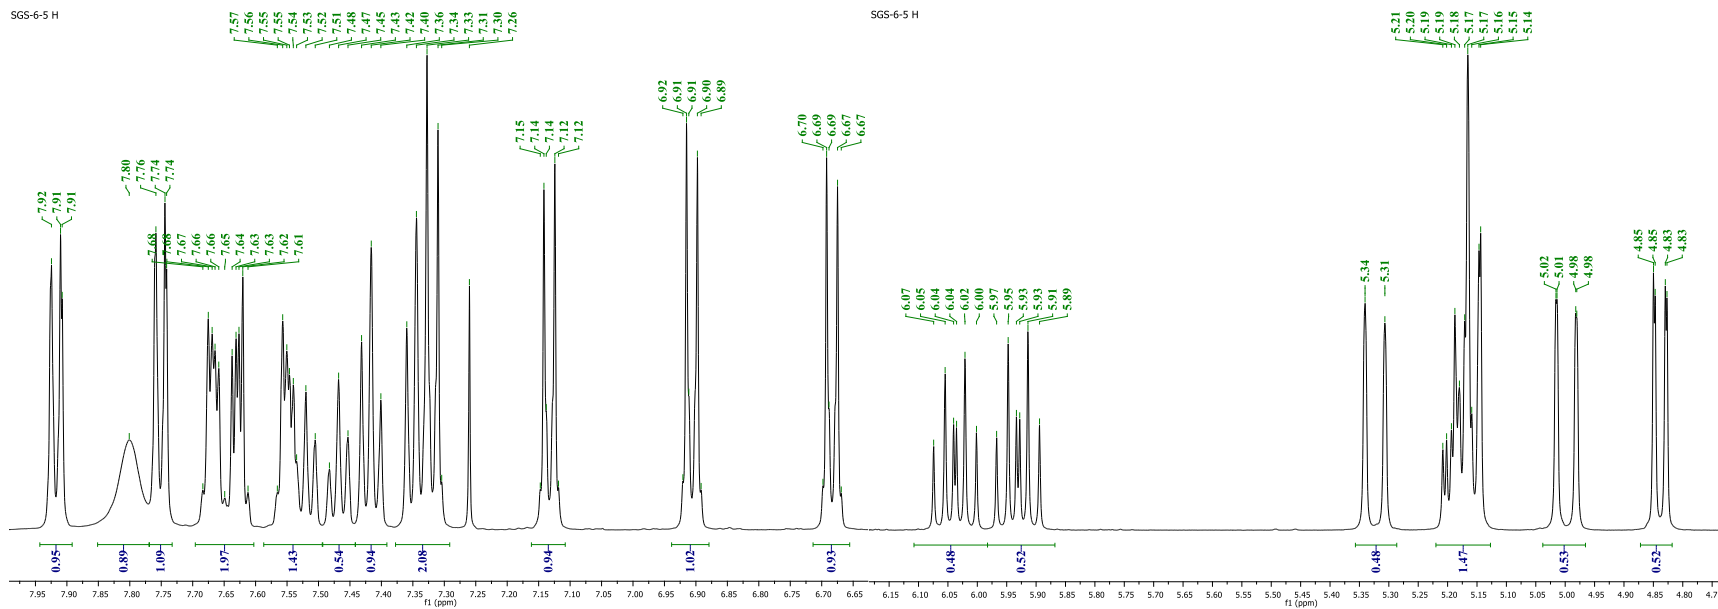

SGS-6-5 H

SGS-6-5 H

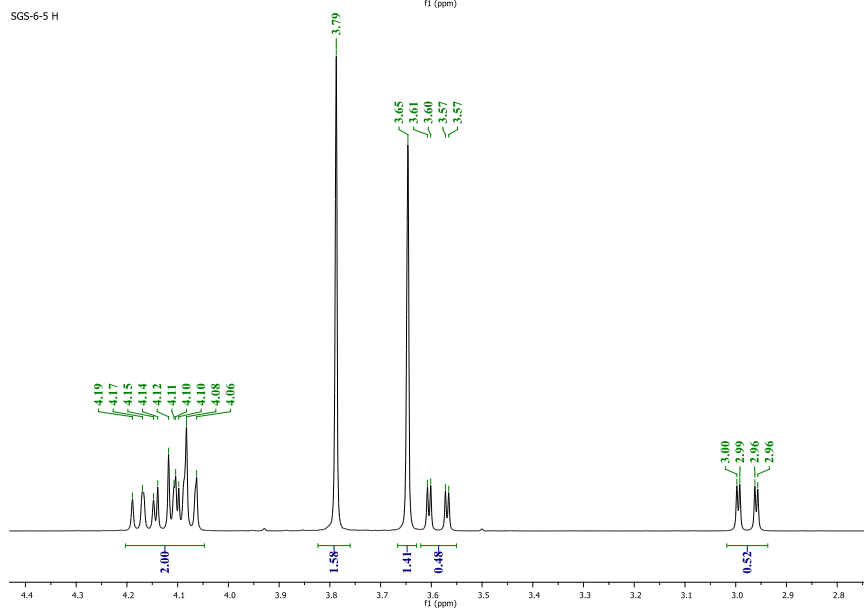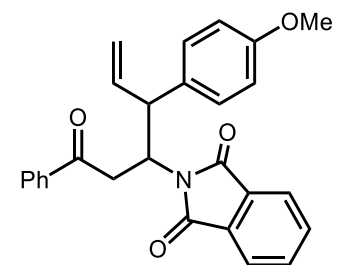

**7ac**  
<sup>1</sup>H NMR  
 500 MHz, CDCl<sub>3</sub>

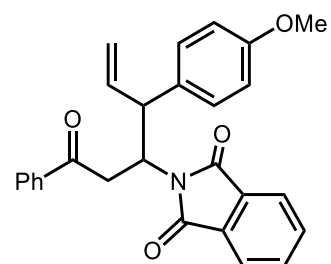

**7ac**  
<sup>13</sup>C NMR  
 126 MHz, CDCl<sub>3</sub>

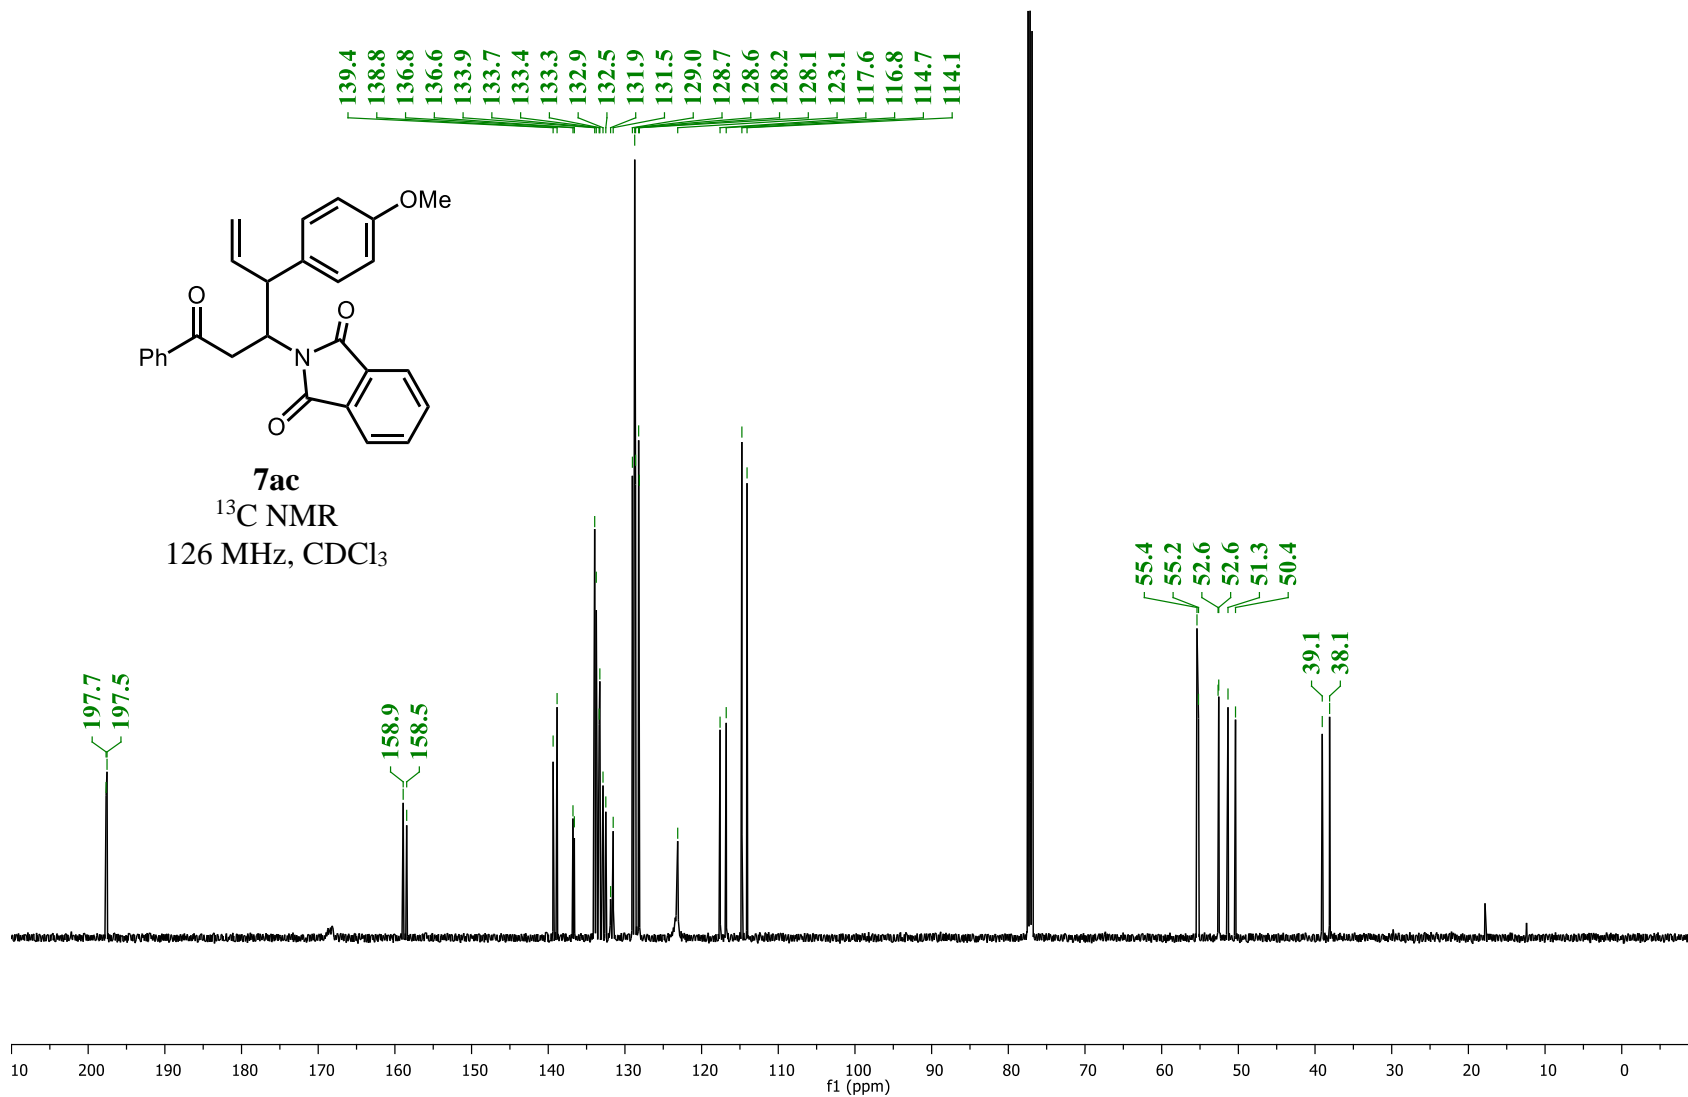



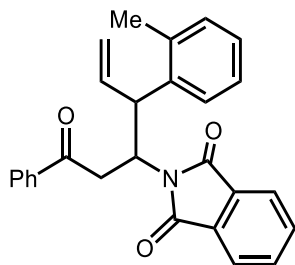

**7ai**  
<sup>1</sup>H NMR  
 500 MHz, CDCl<sub>3</sub>

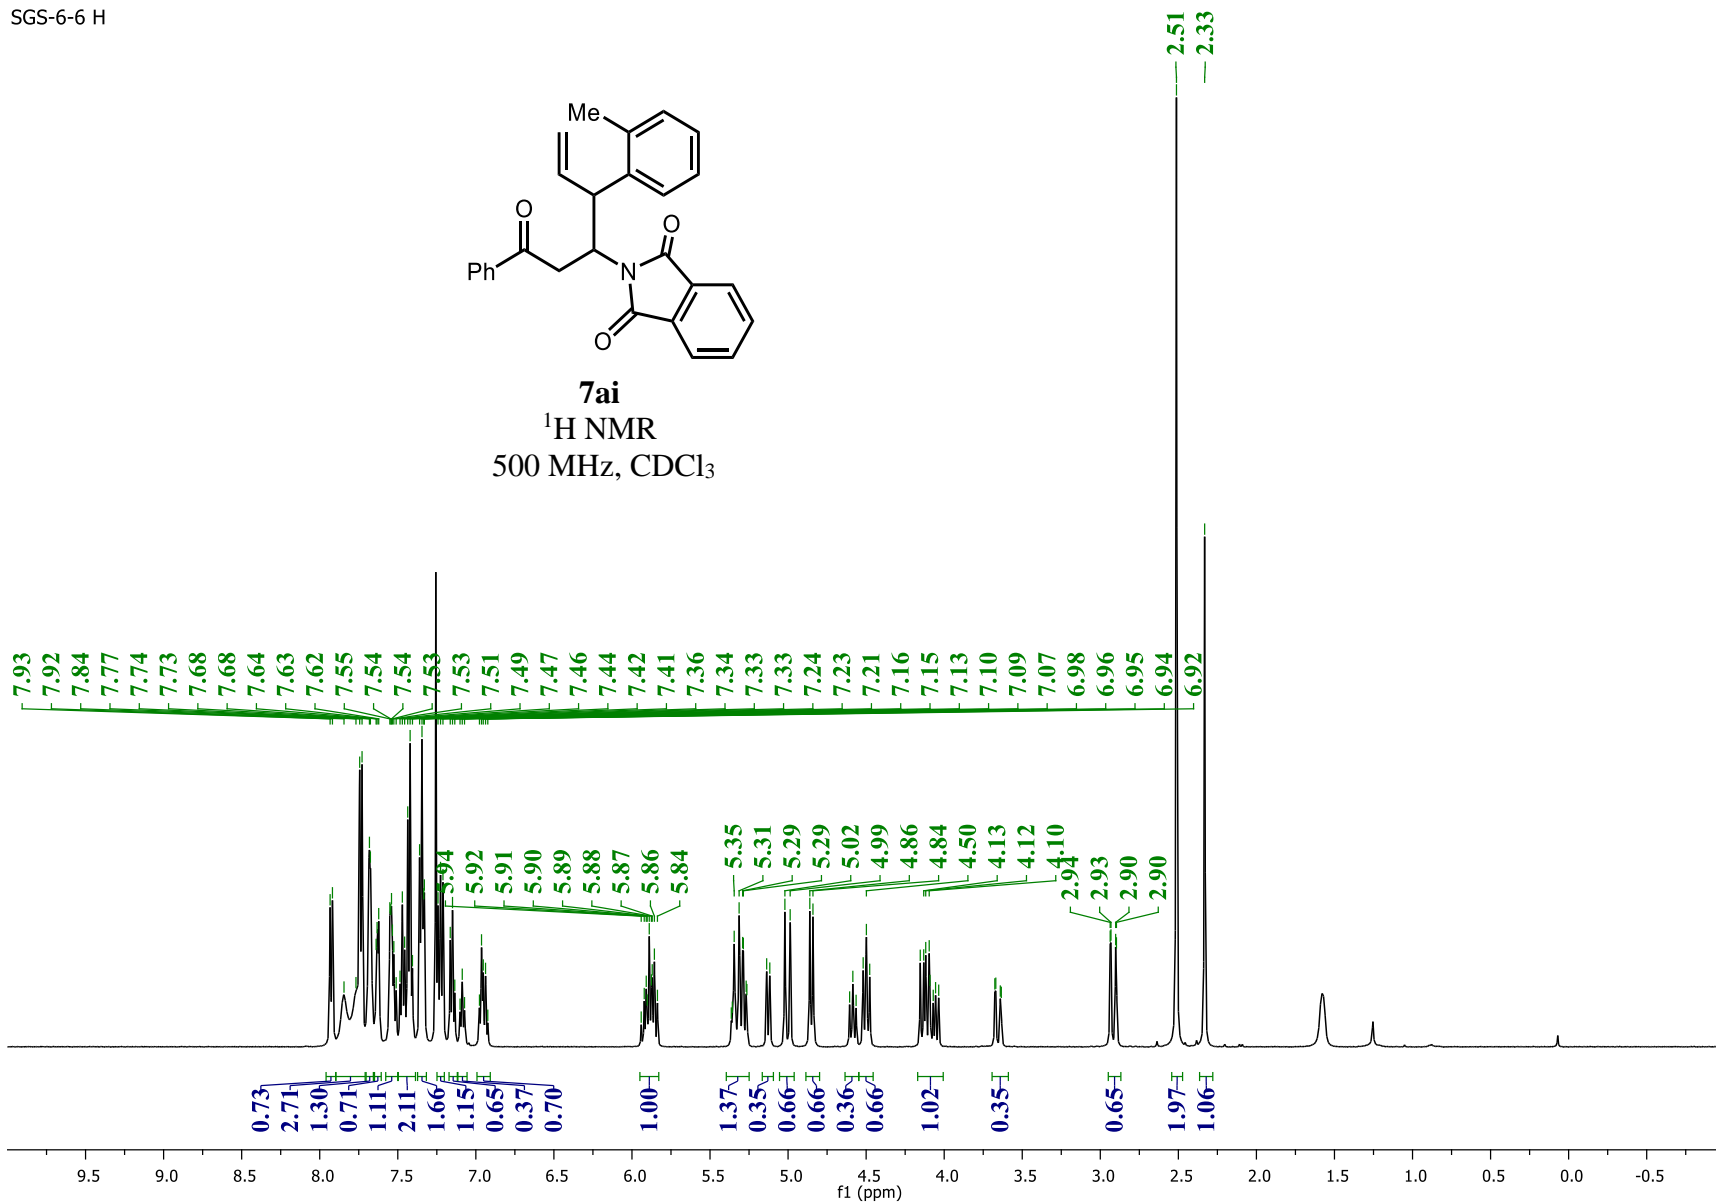

SG5-6-6 H

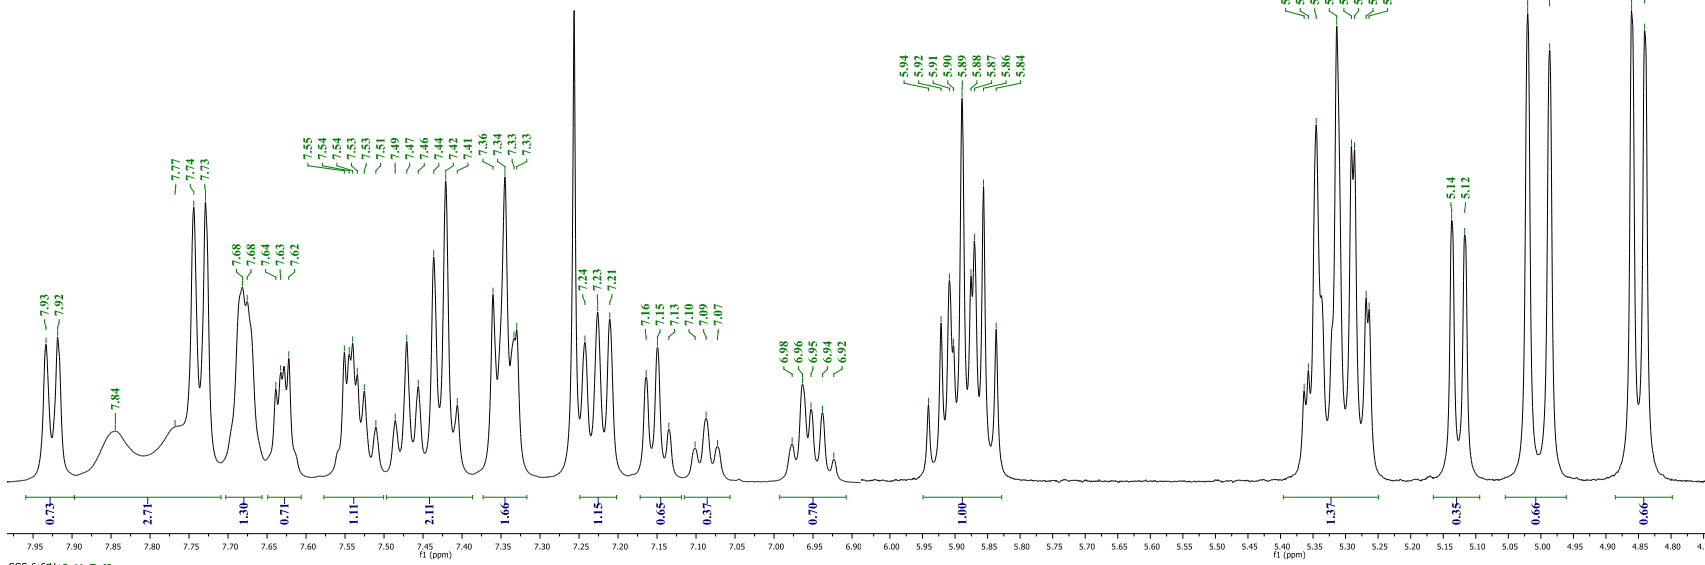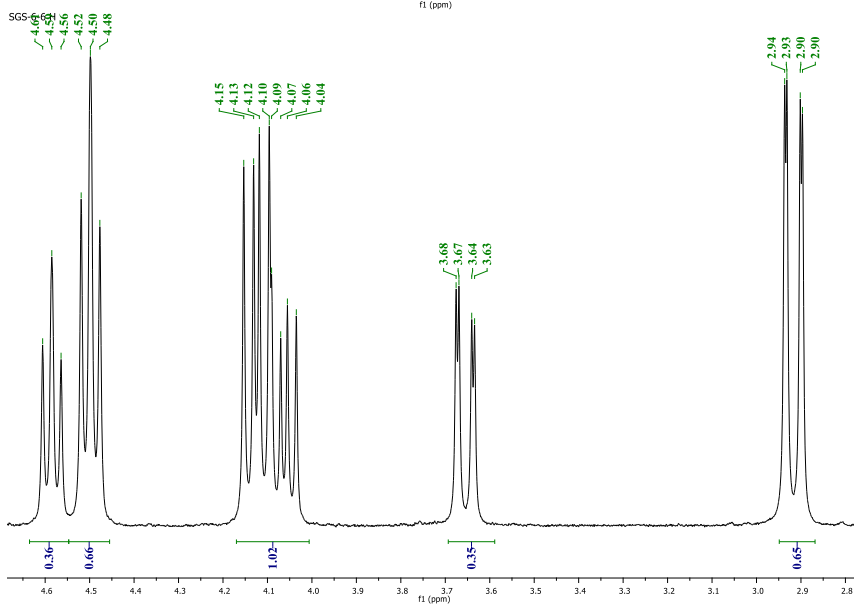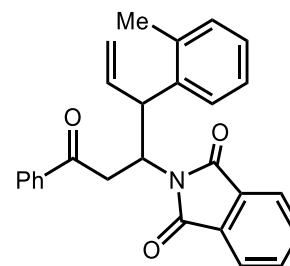

**7ai**  
<sup>1</sup>H NMR  
 500 MHz, CDCl<sub>3</sub>

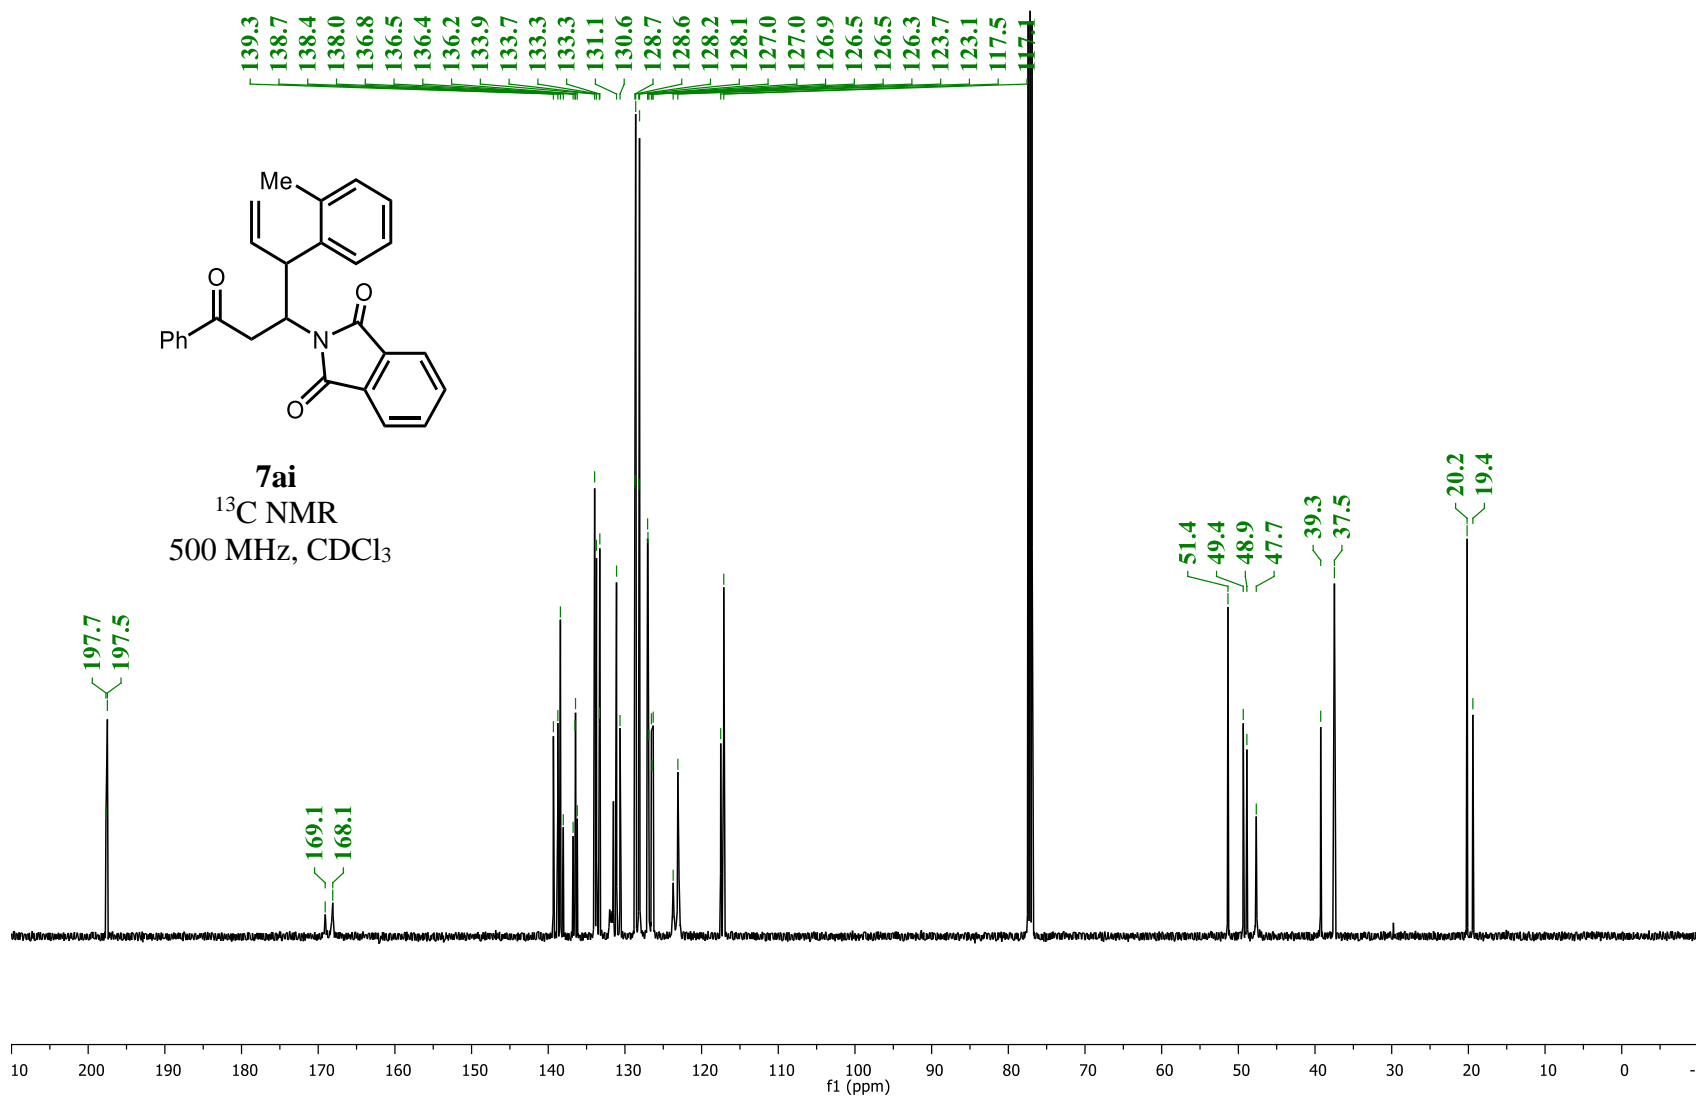

SGS-6-2 H

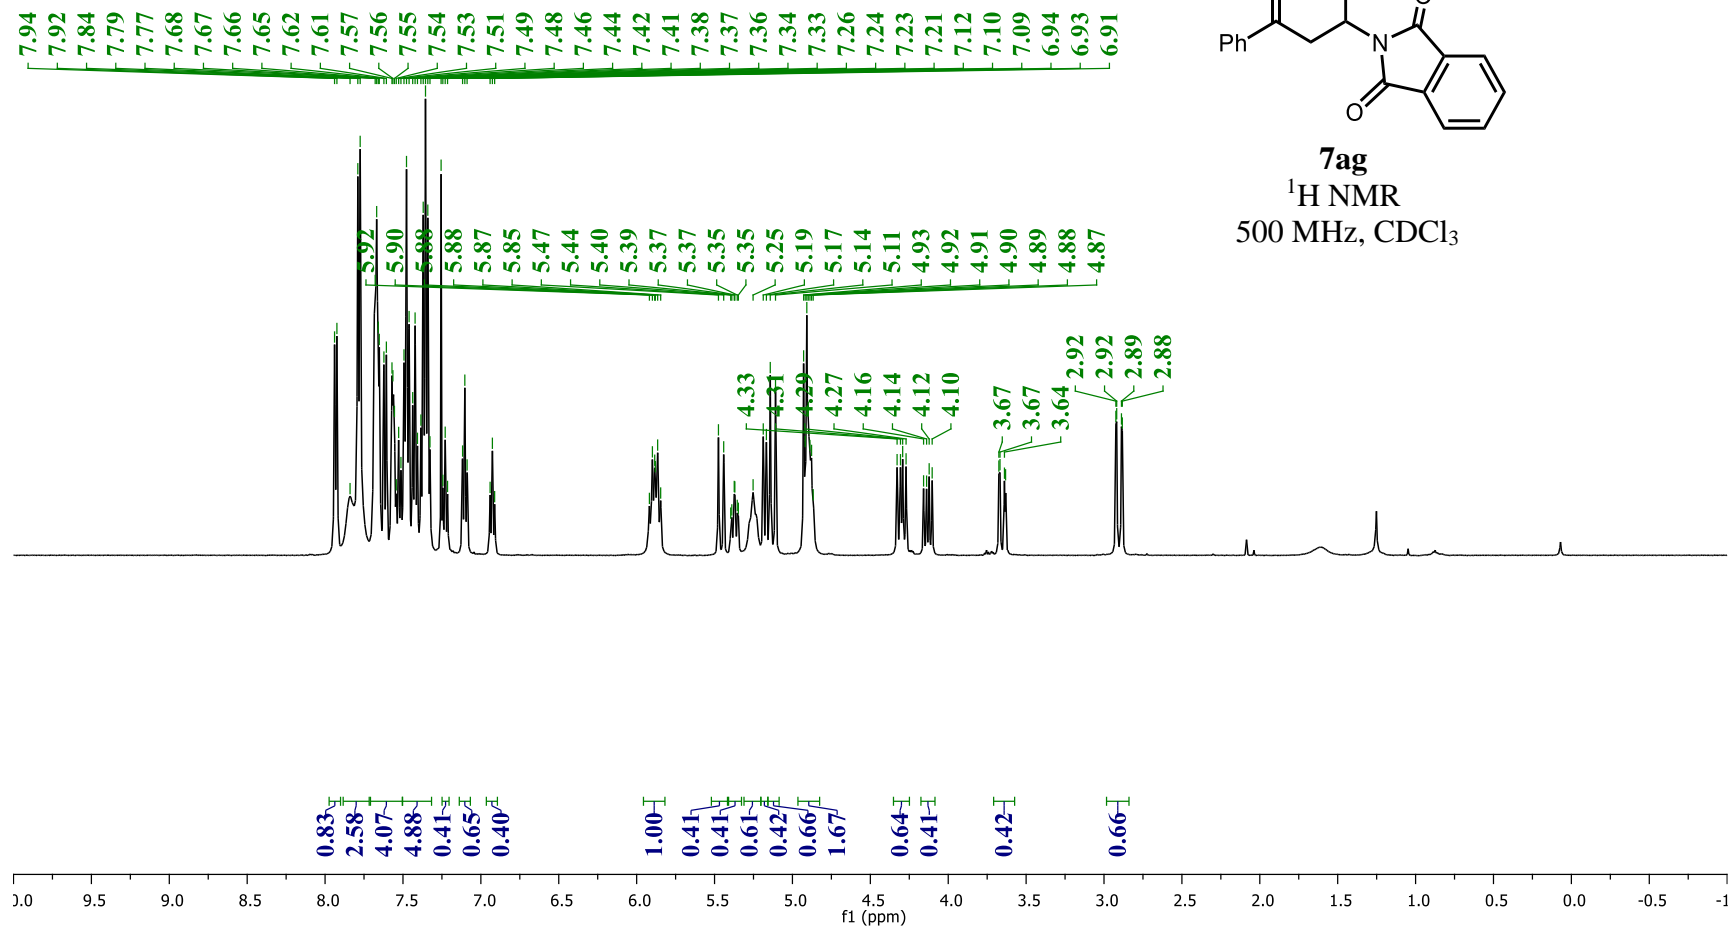

S136

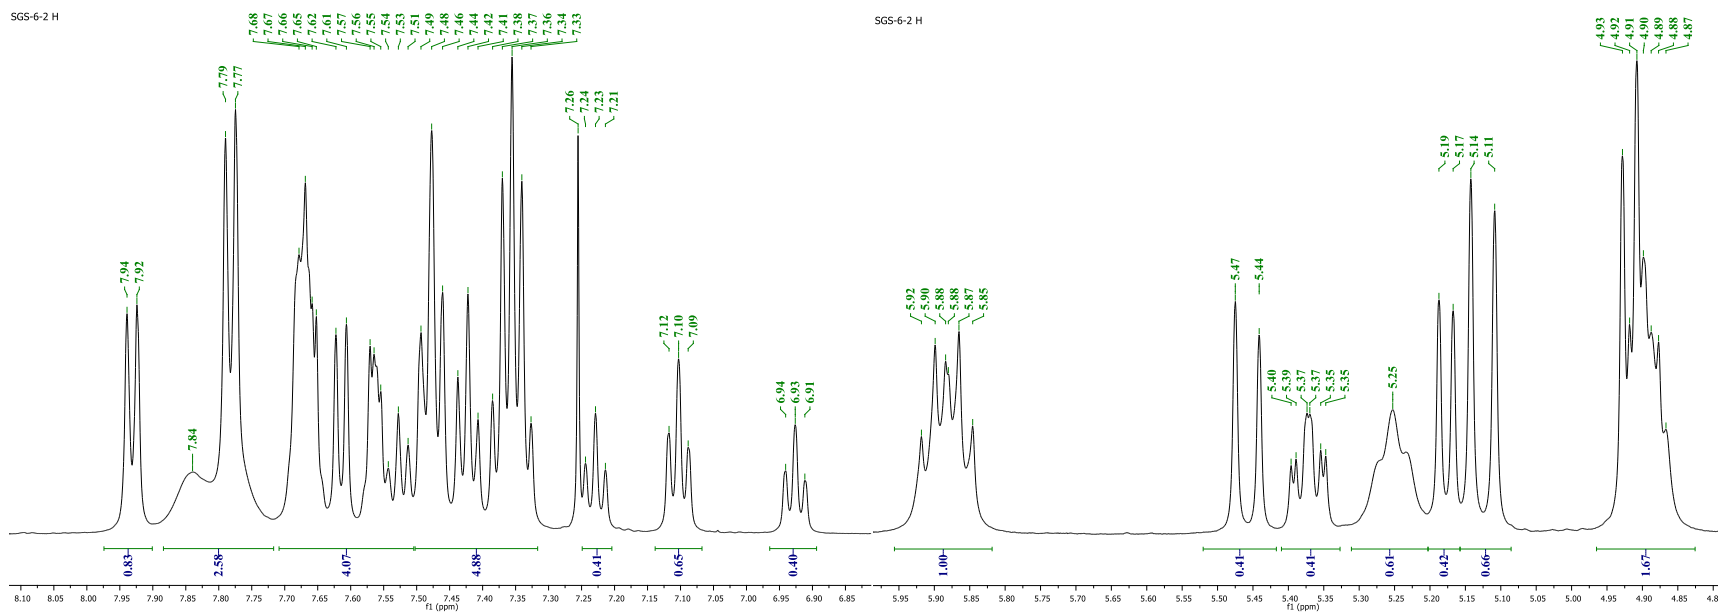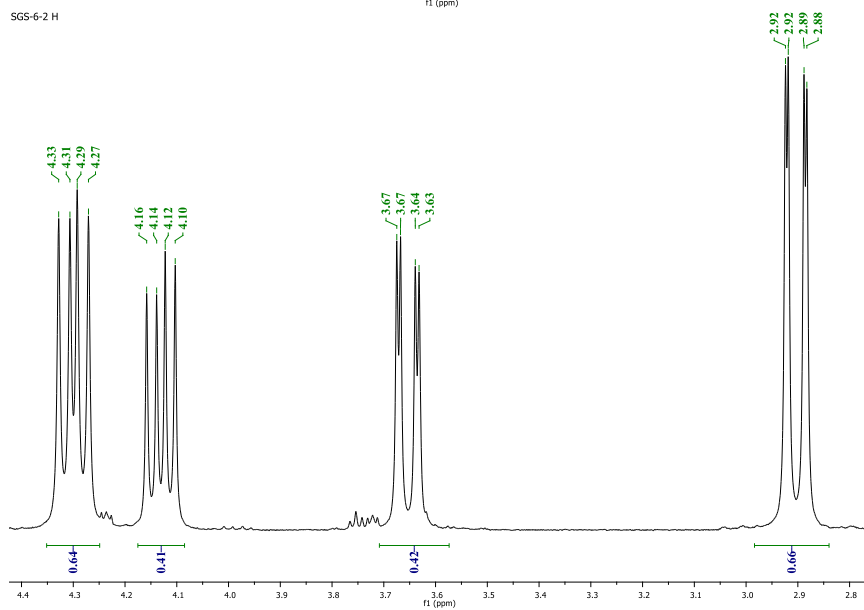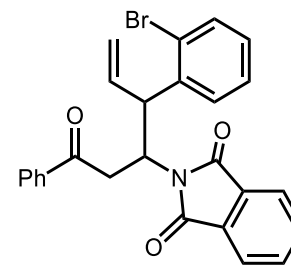

**7ag**  
 $^1\text{H NMR}$   
 500 MHz,  $\text{CDCl}_3$

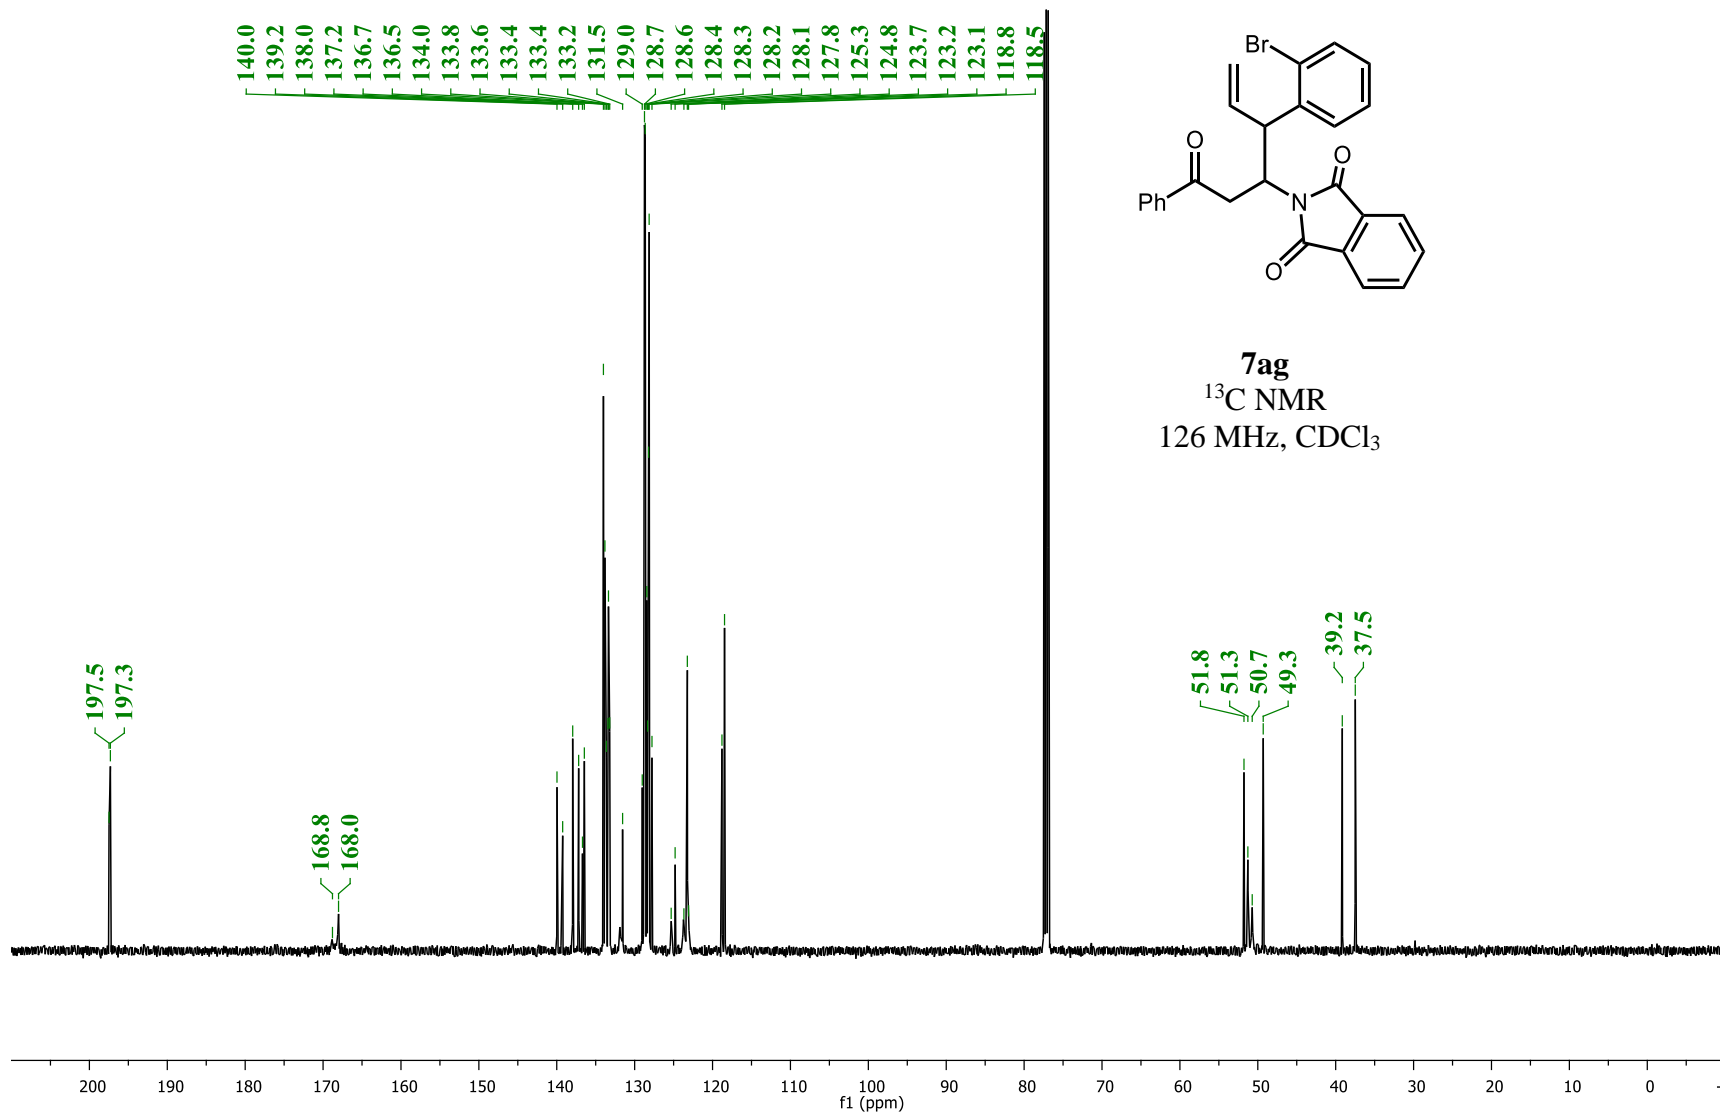

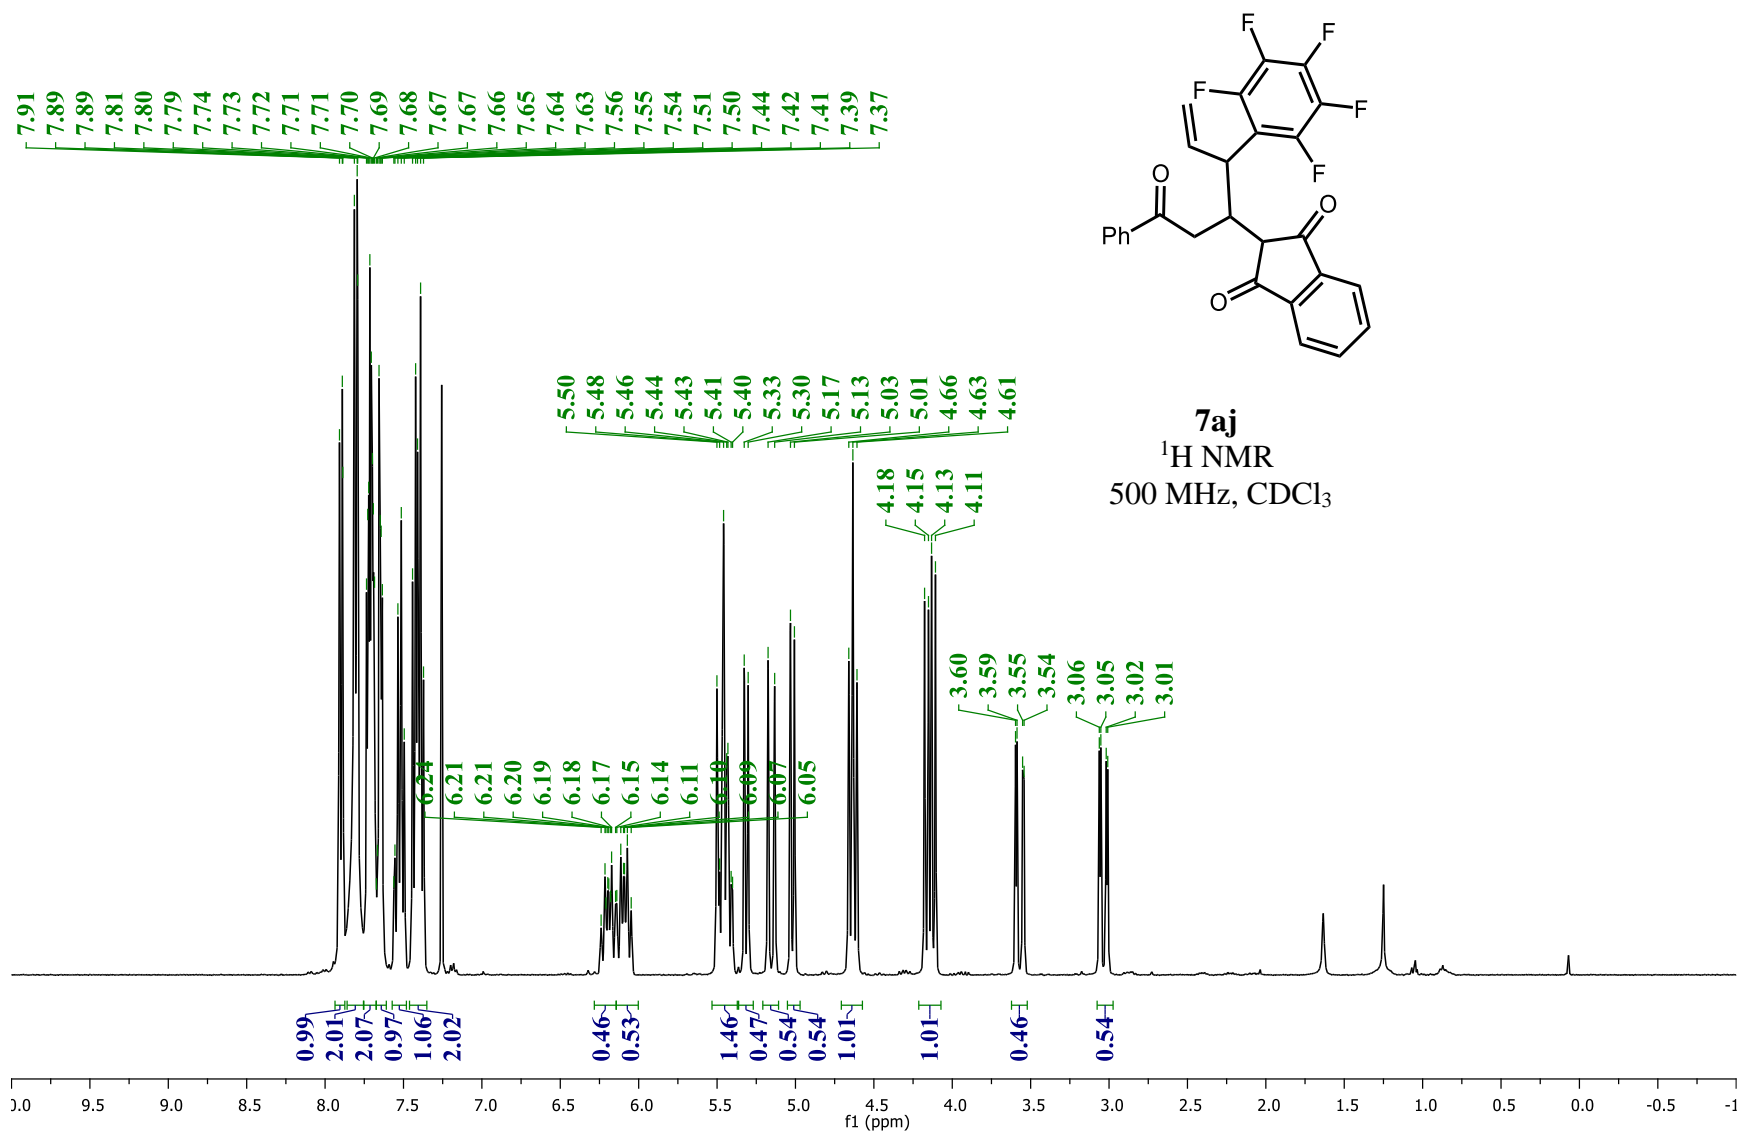

SG5-6-4 H

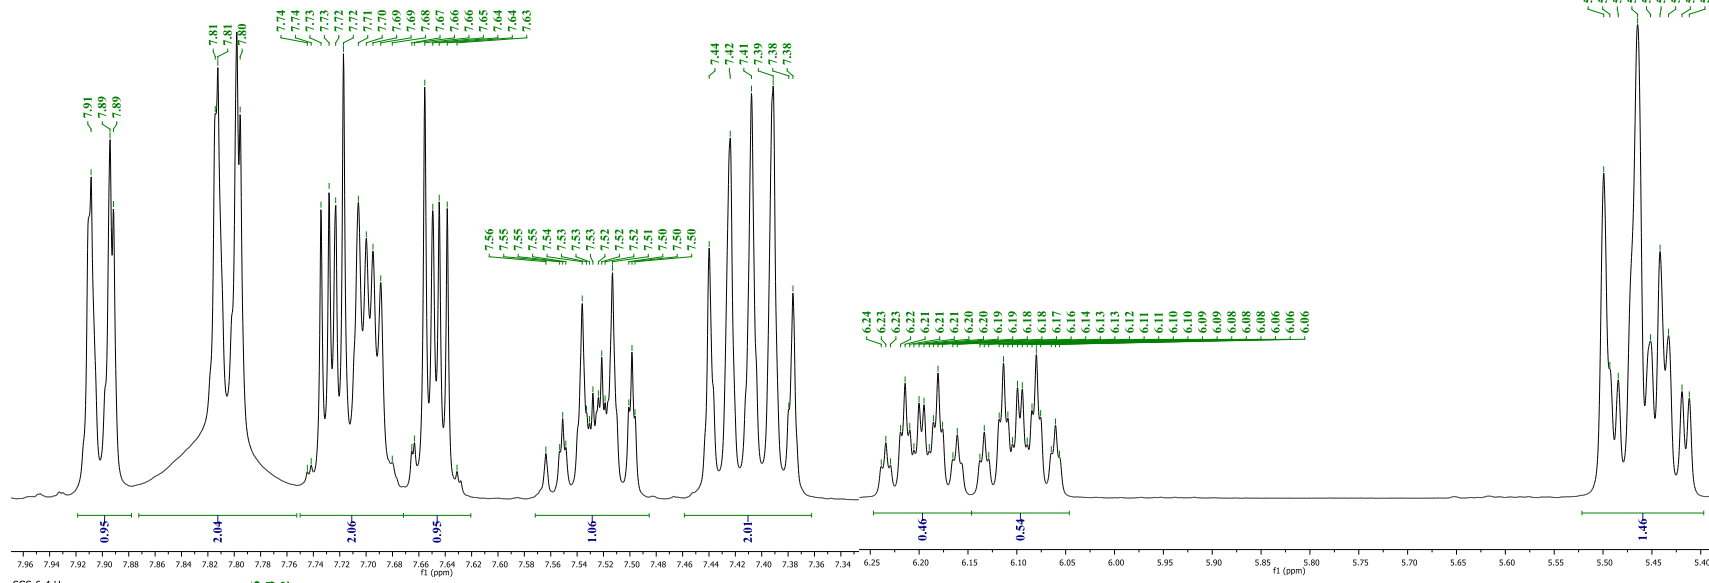

SG5-6-4 H

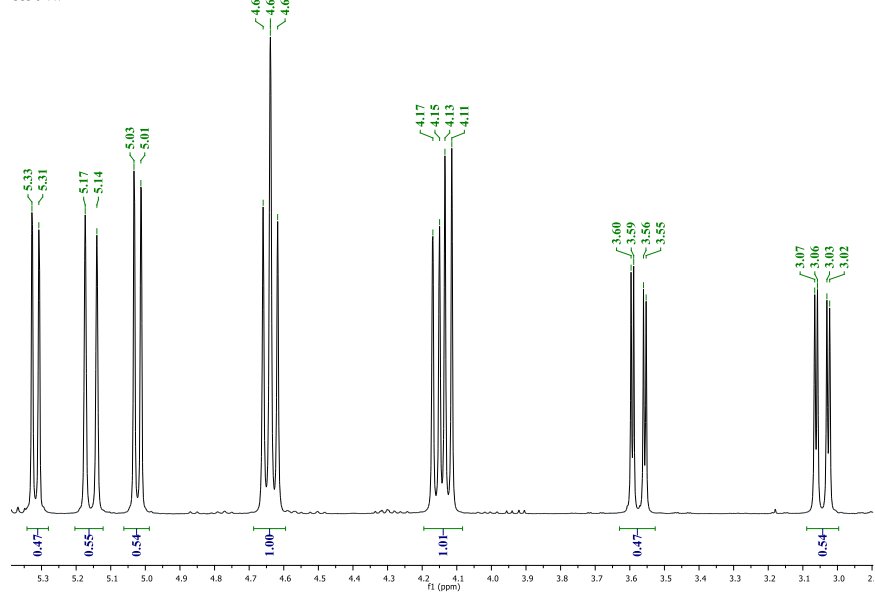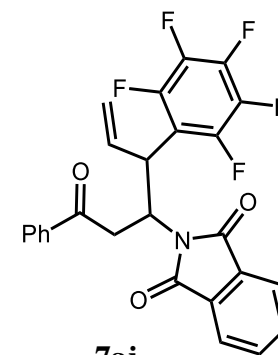

**7aj**  
 $^1\text{H}$  NMR  
 500 MHz,  $\text{CDCl}_3$



SGS-6-4 C

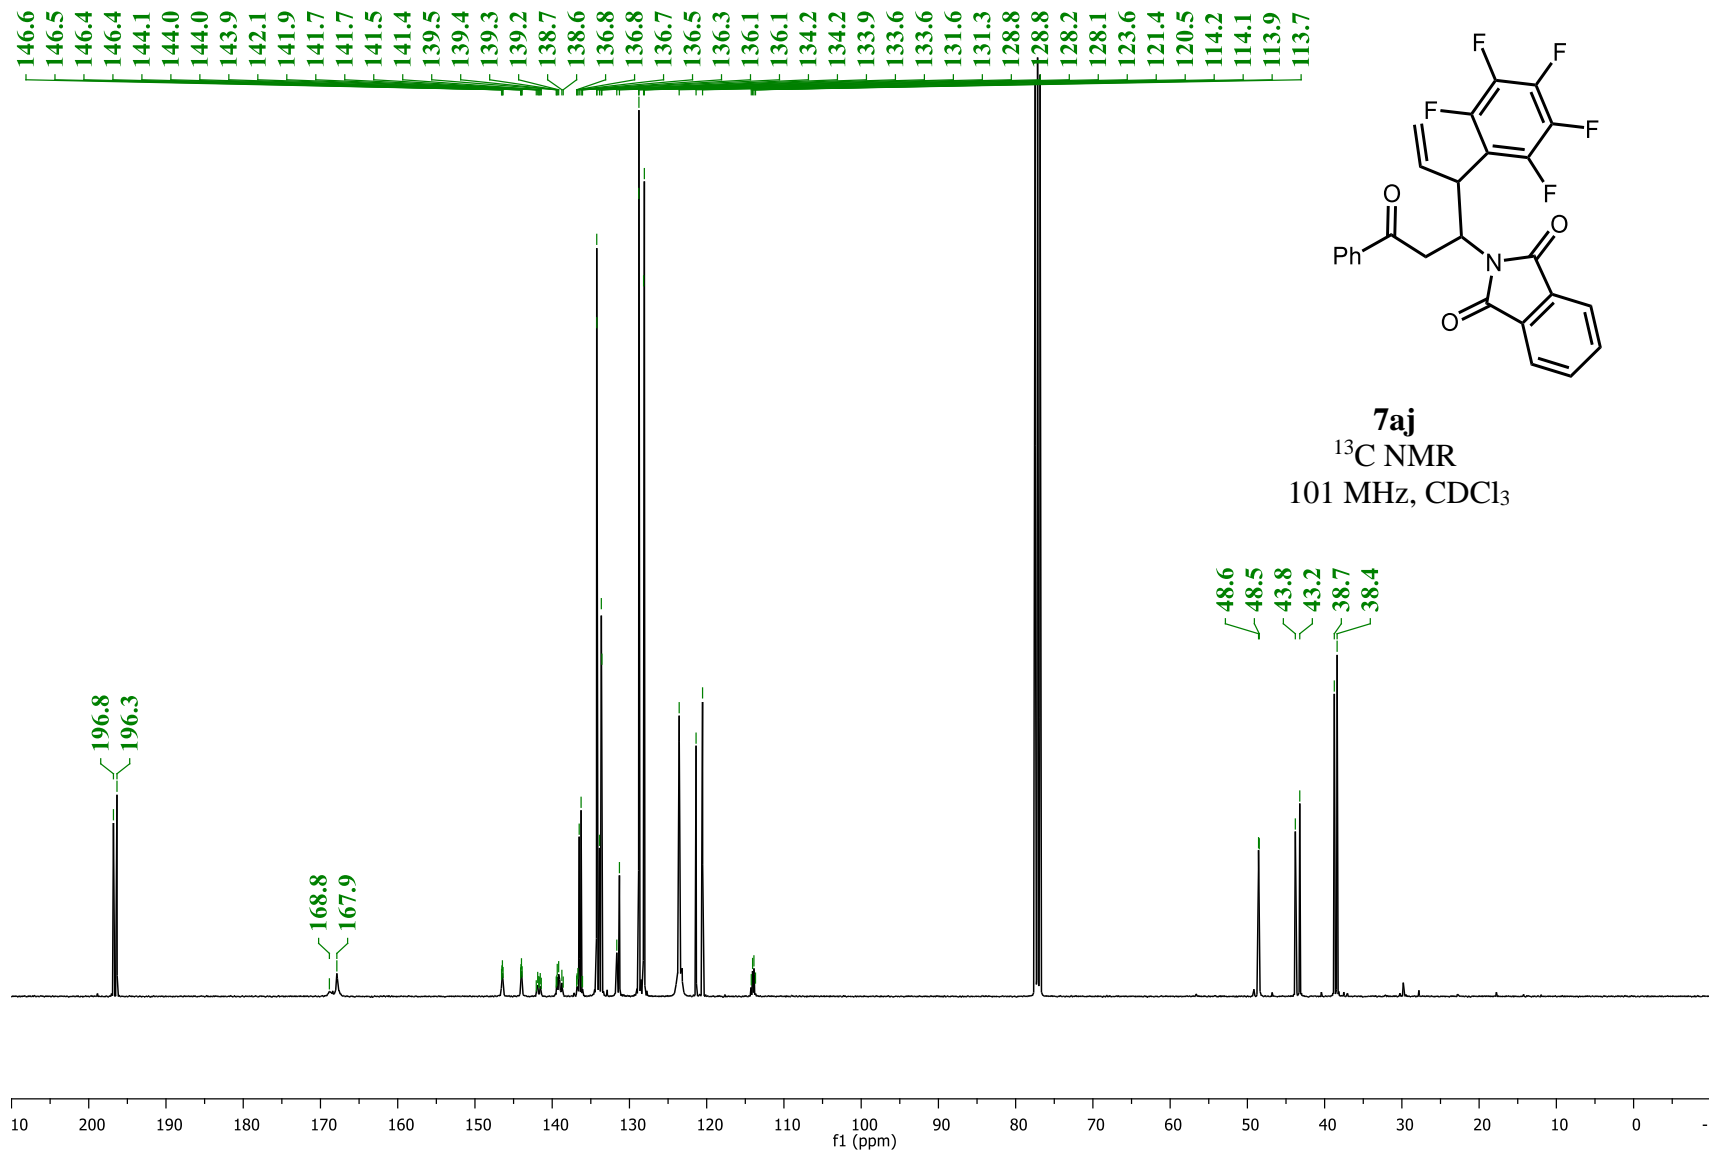



SGS-6-4 F

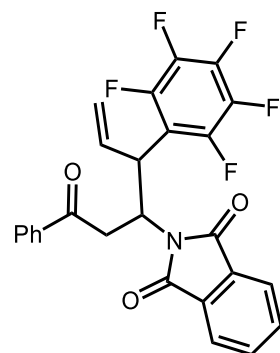

**7aj**  
<sup>19</sup>F NMR  
471 MHz, CDCl<sub>3</sub>

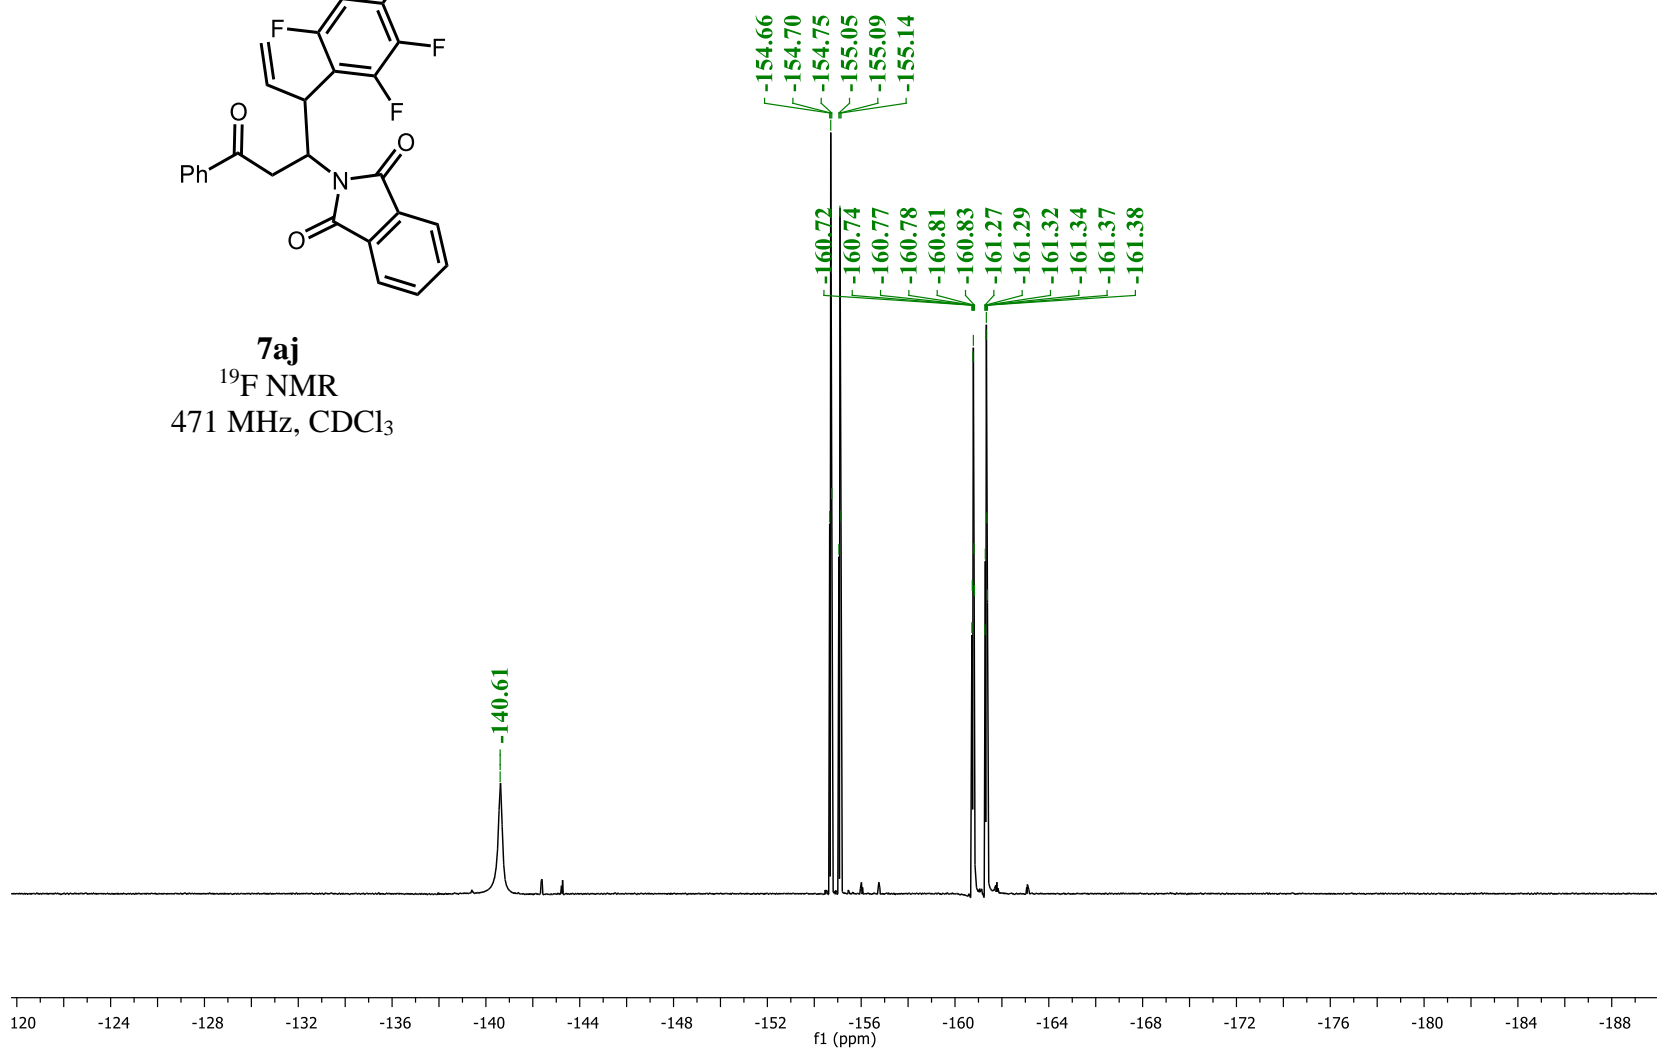

SGS-6-3 H

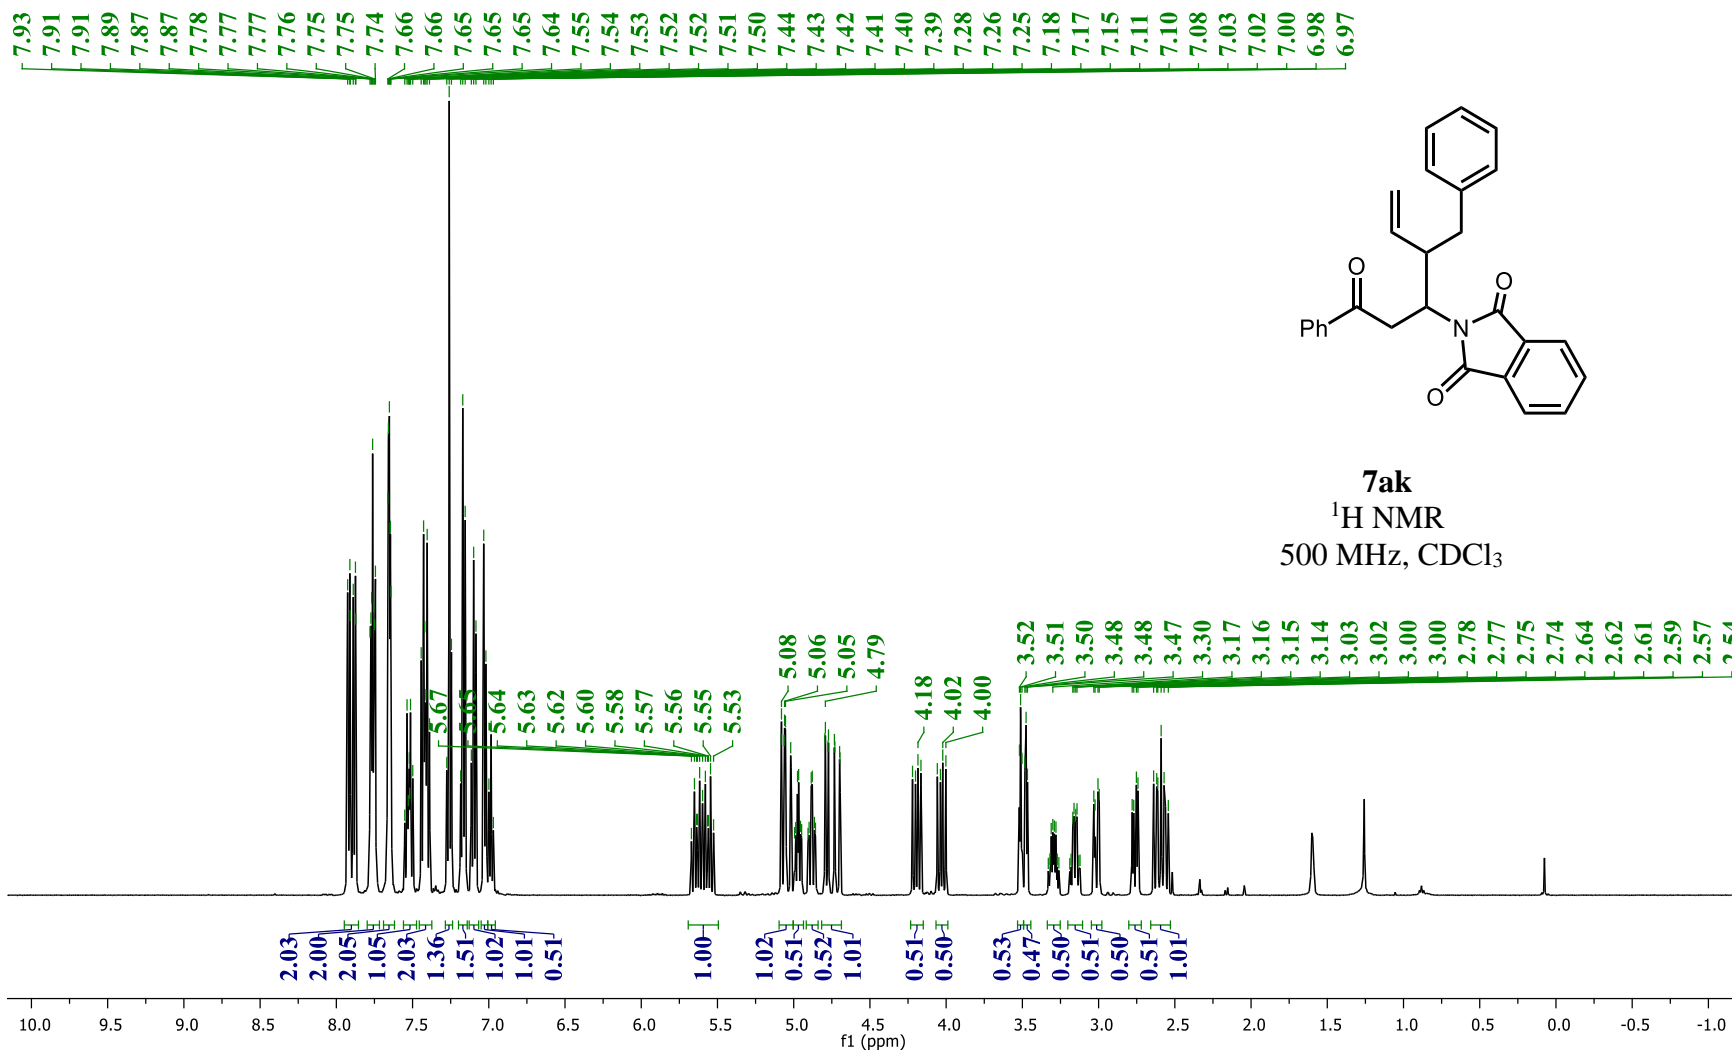

SG5-6-3 H

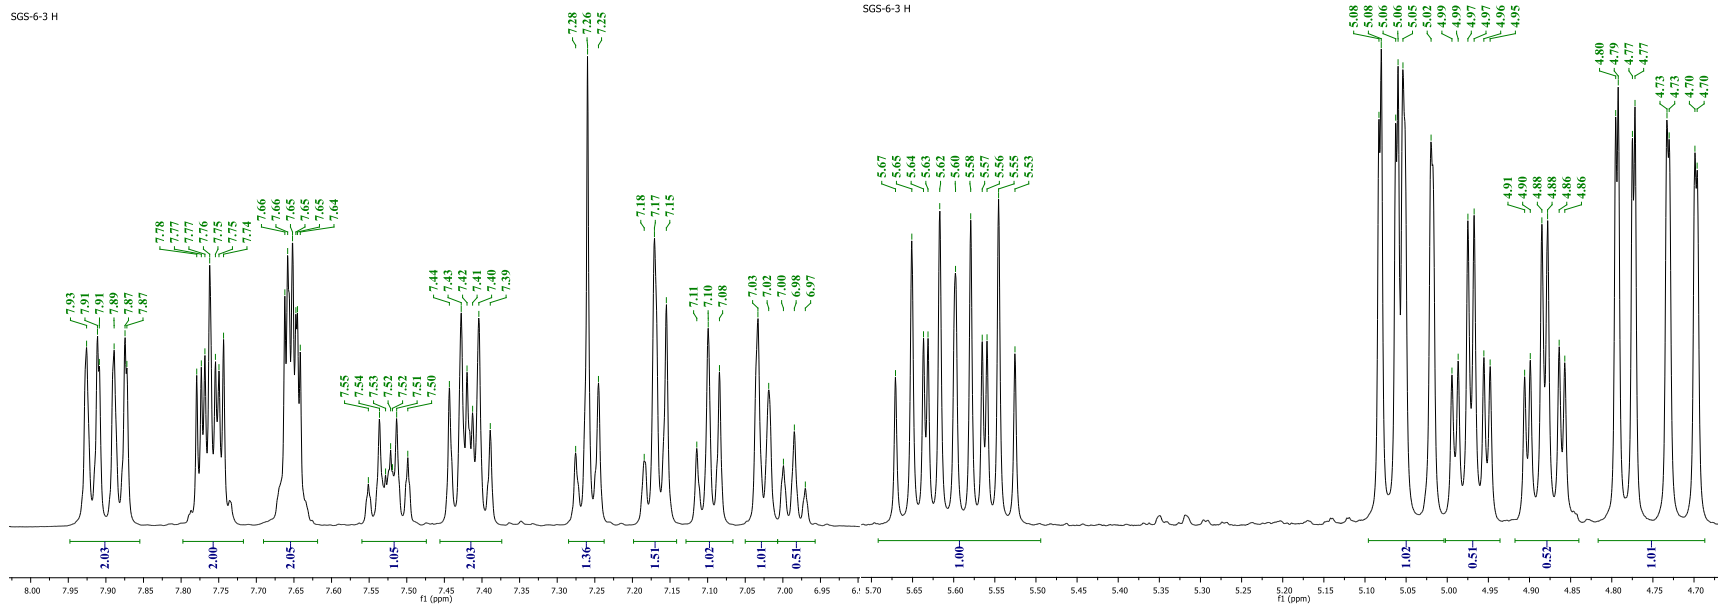

SG5-6-3 H

SG5-6-3 H

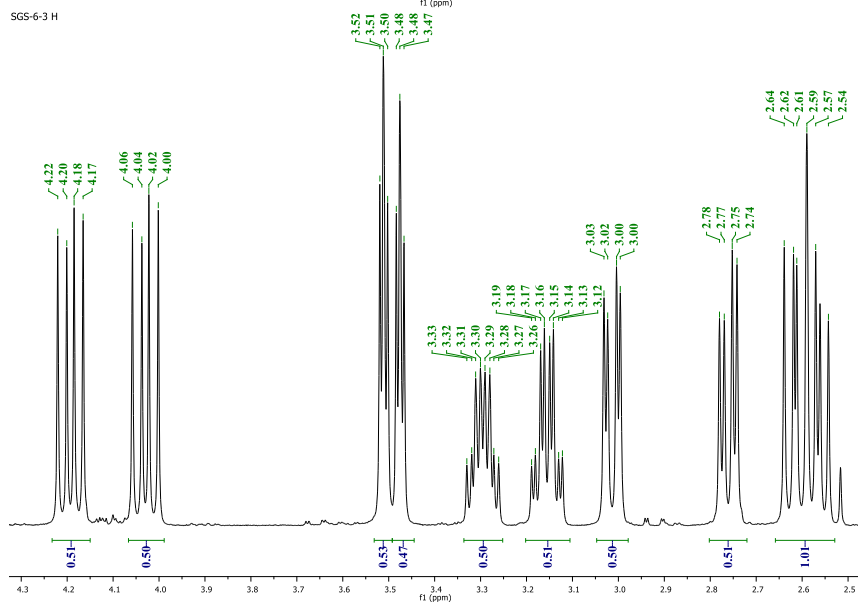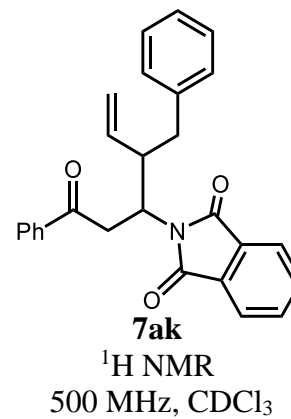

S145

SGS-6-3 C

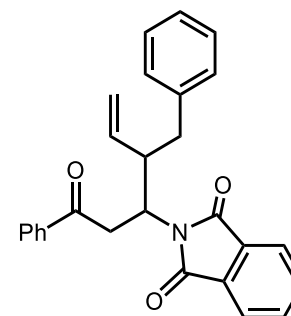

**7ak**  
<sup>13</sup>C NMR  
126 MHz, CDCl<sub>3</sub>

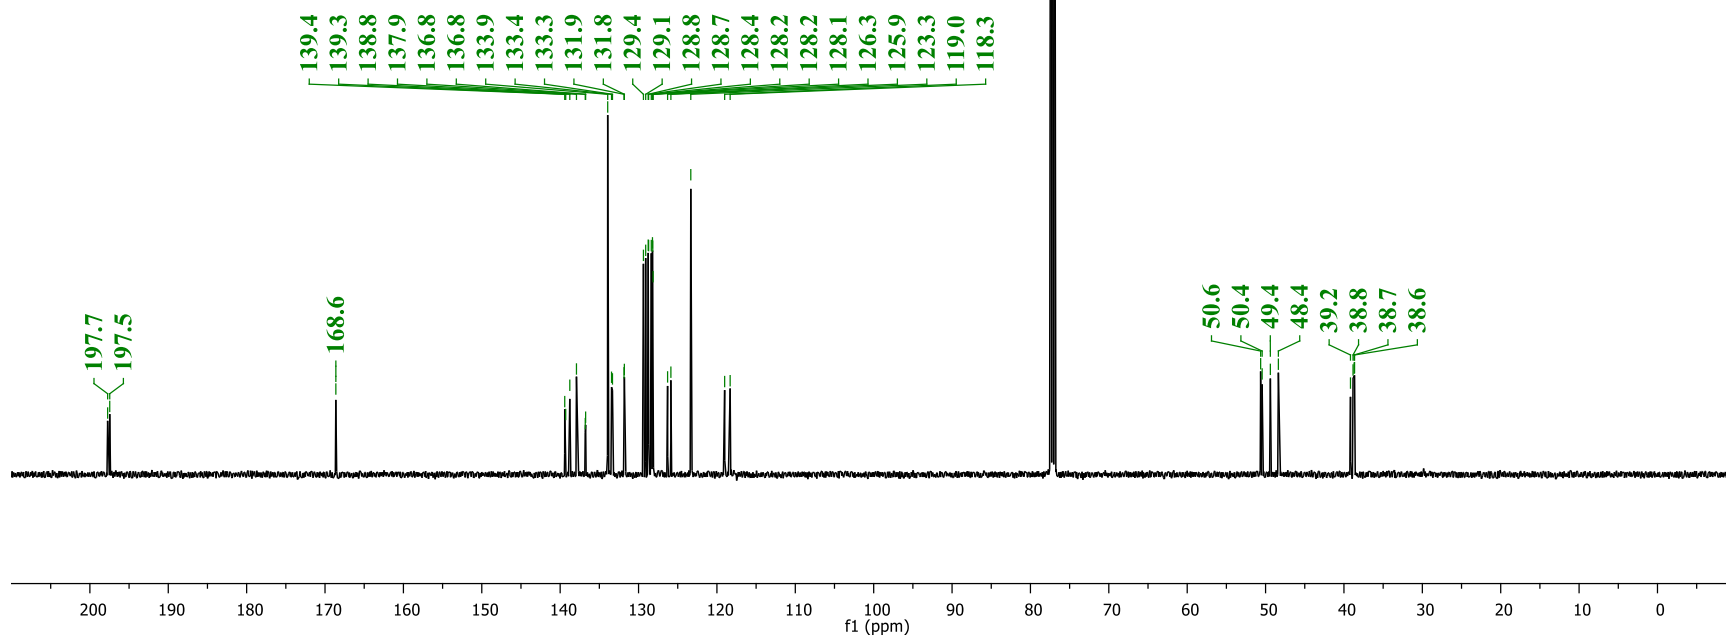

SGS-5-23 H

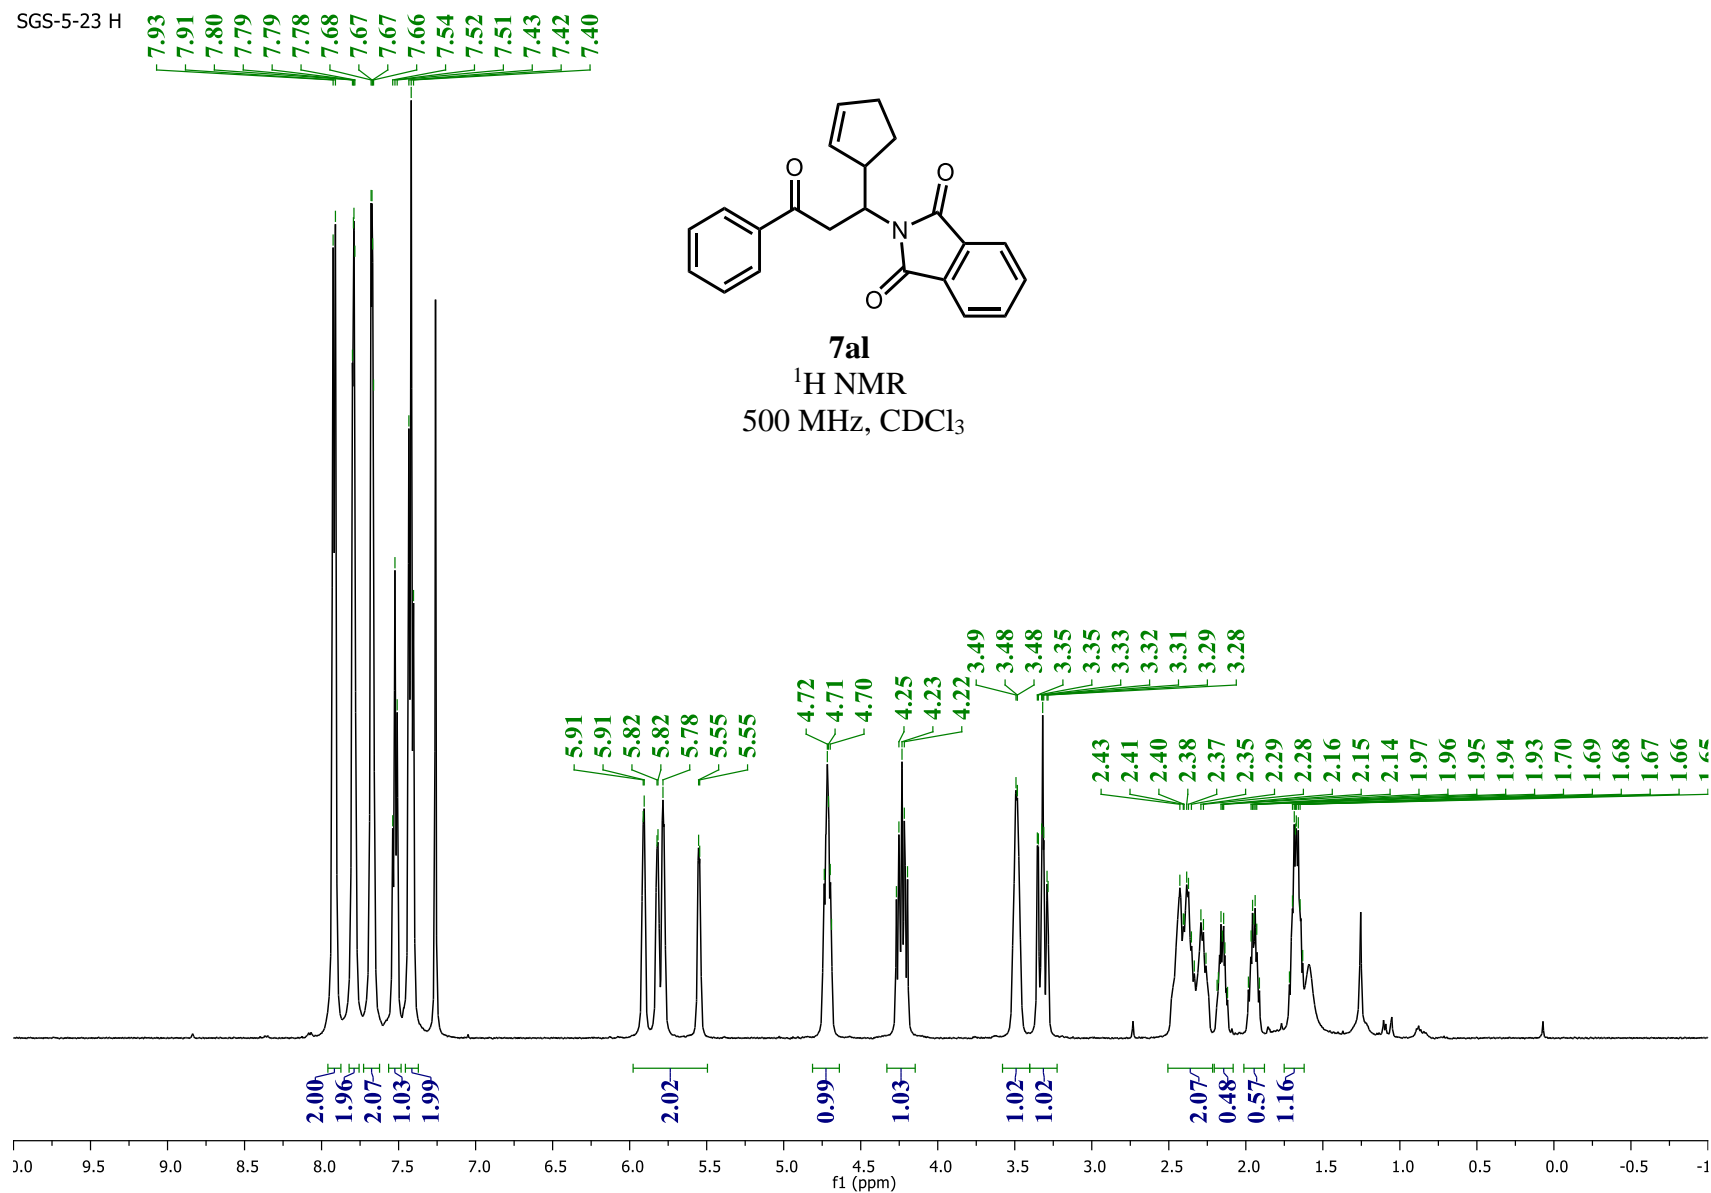

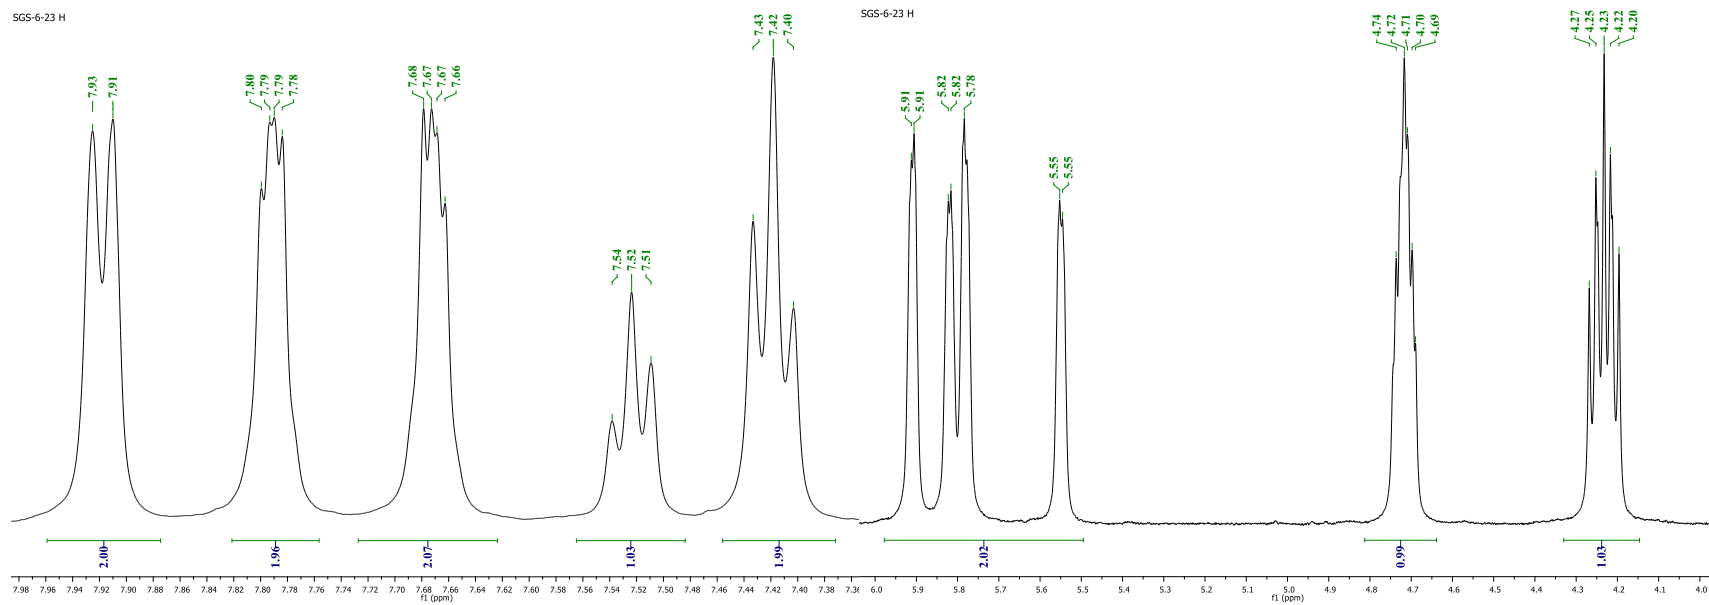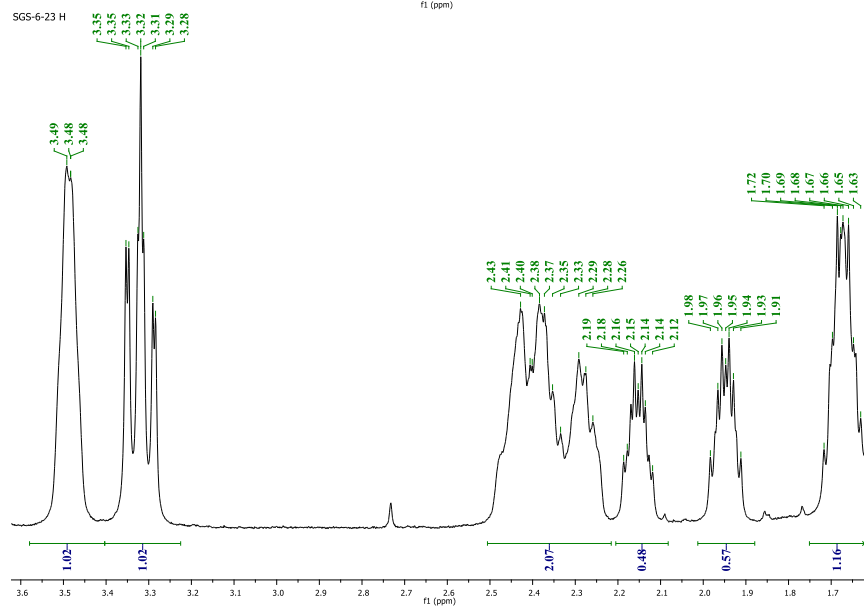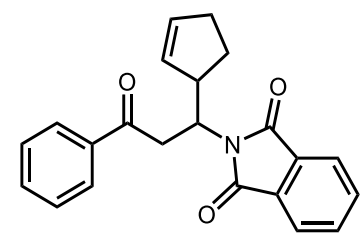

**7a**  
<sup>1</sup>H NMR  
 500 MHz, CDCl<sub>3</sub>



SGS-5-23 C

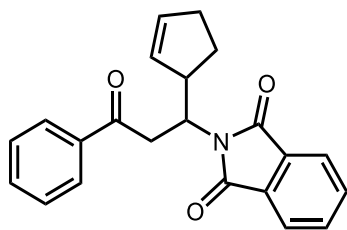

**7al**

<sup>13</sup>C NMR

126 MHz, CDCl<sub>3</sub>

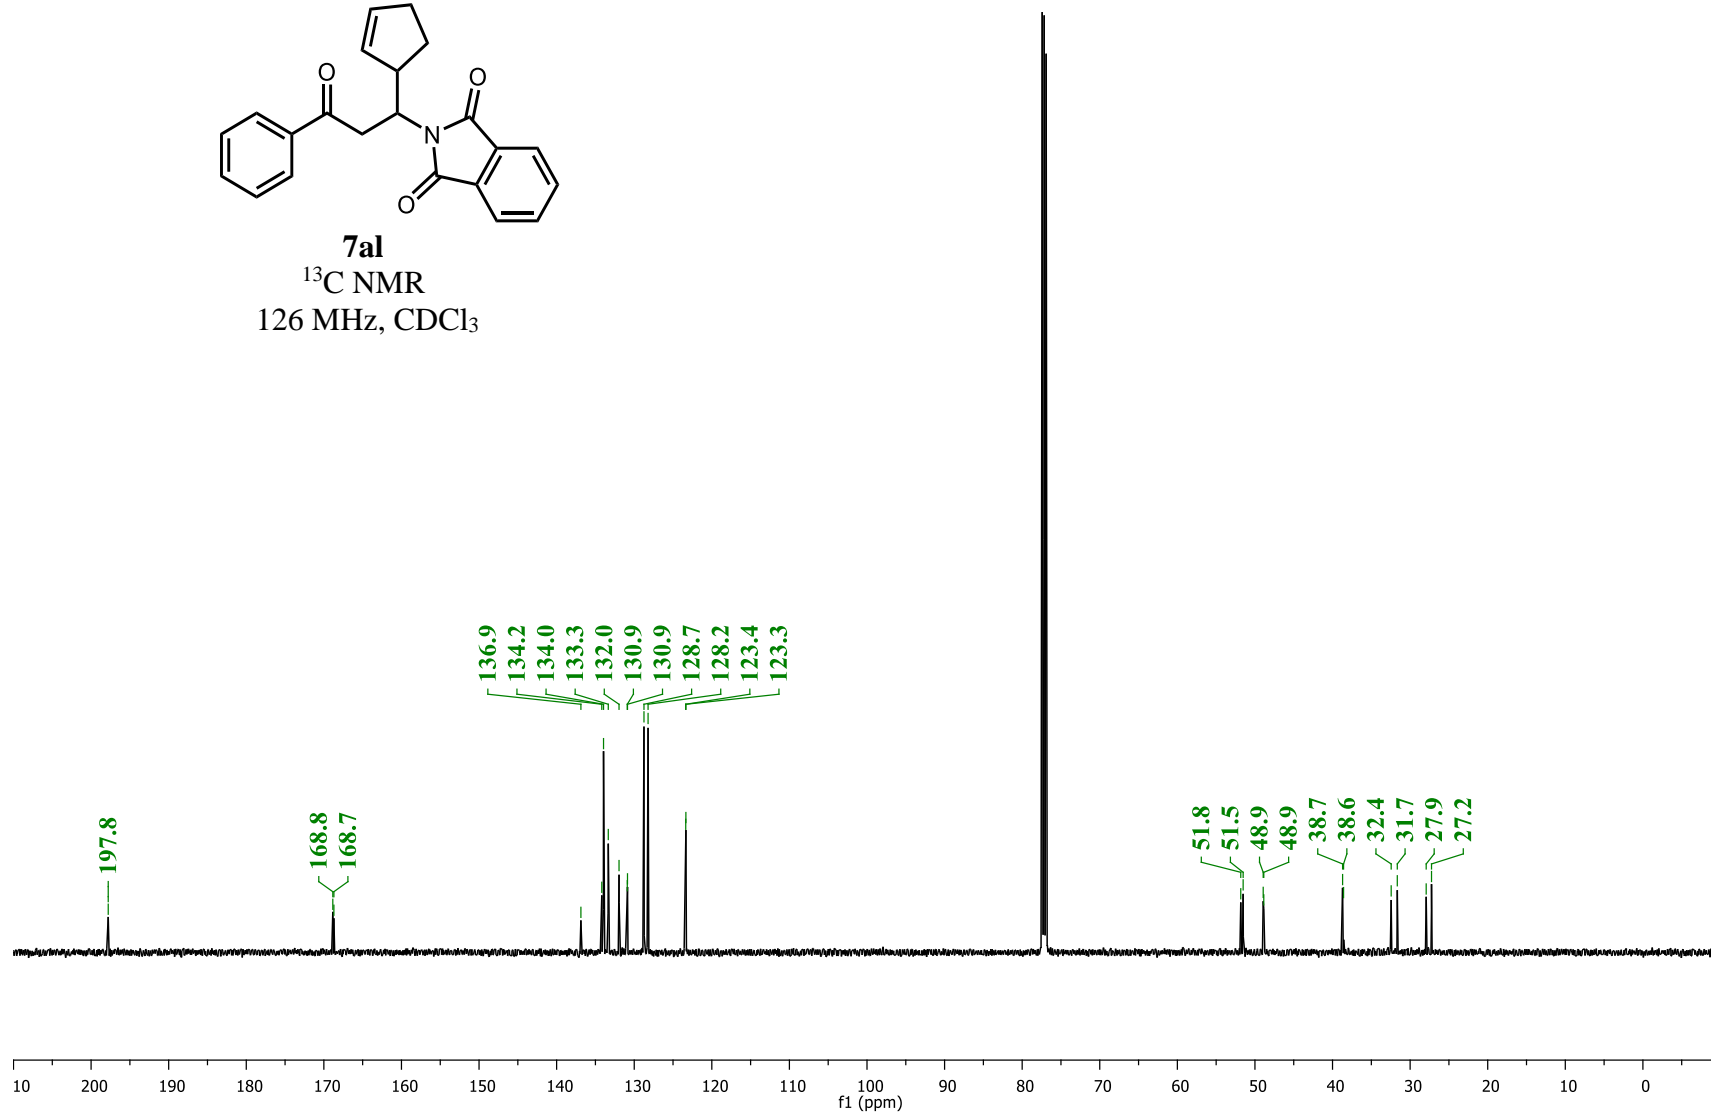

S149



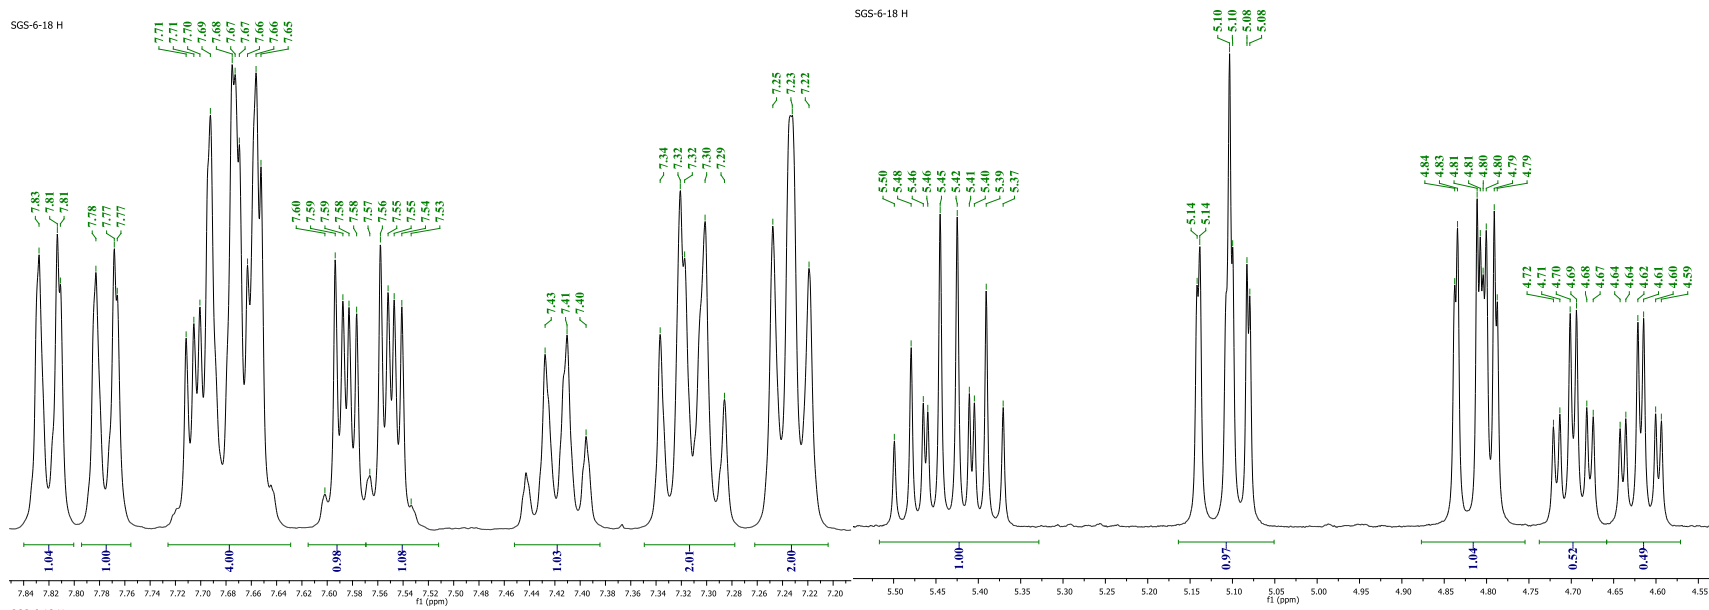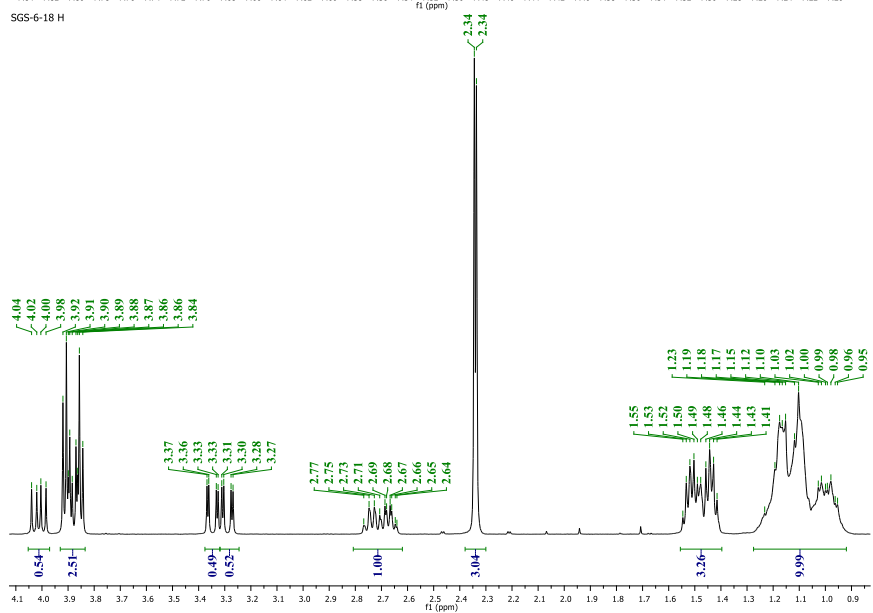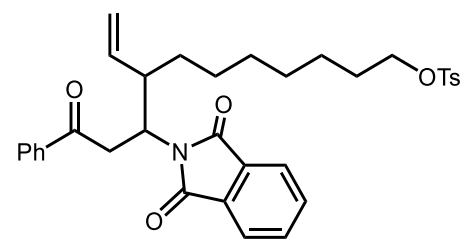

**7am**  
<sup>1</sup>H NMR  
 500 MHz, CDCl<sub>3</sub>

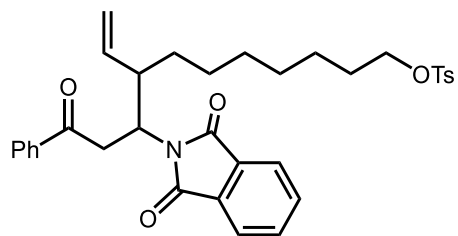

**7am**  
 $^{13}\text{C}$  NMR  
126 MHz,  $\text{CDCl}_3$

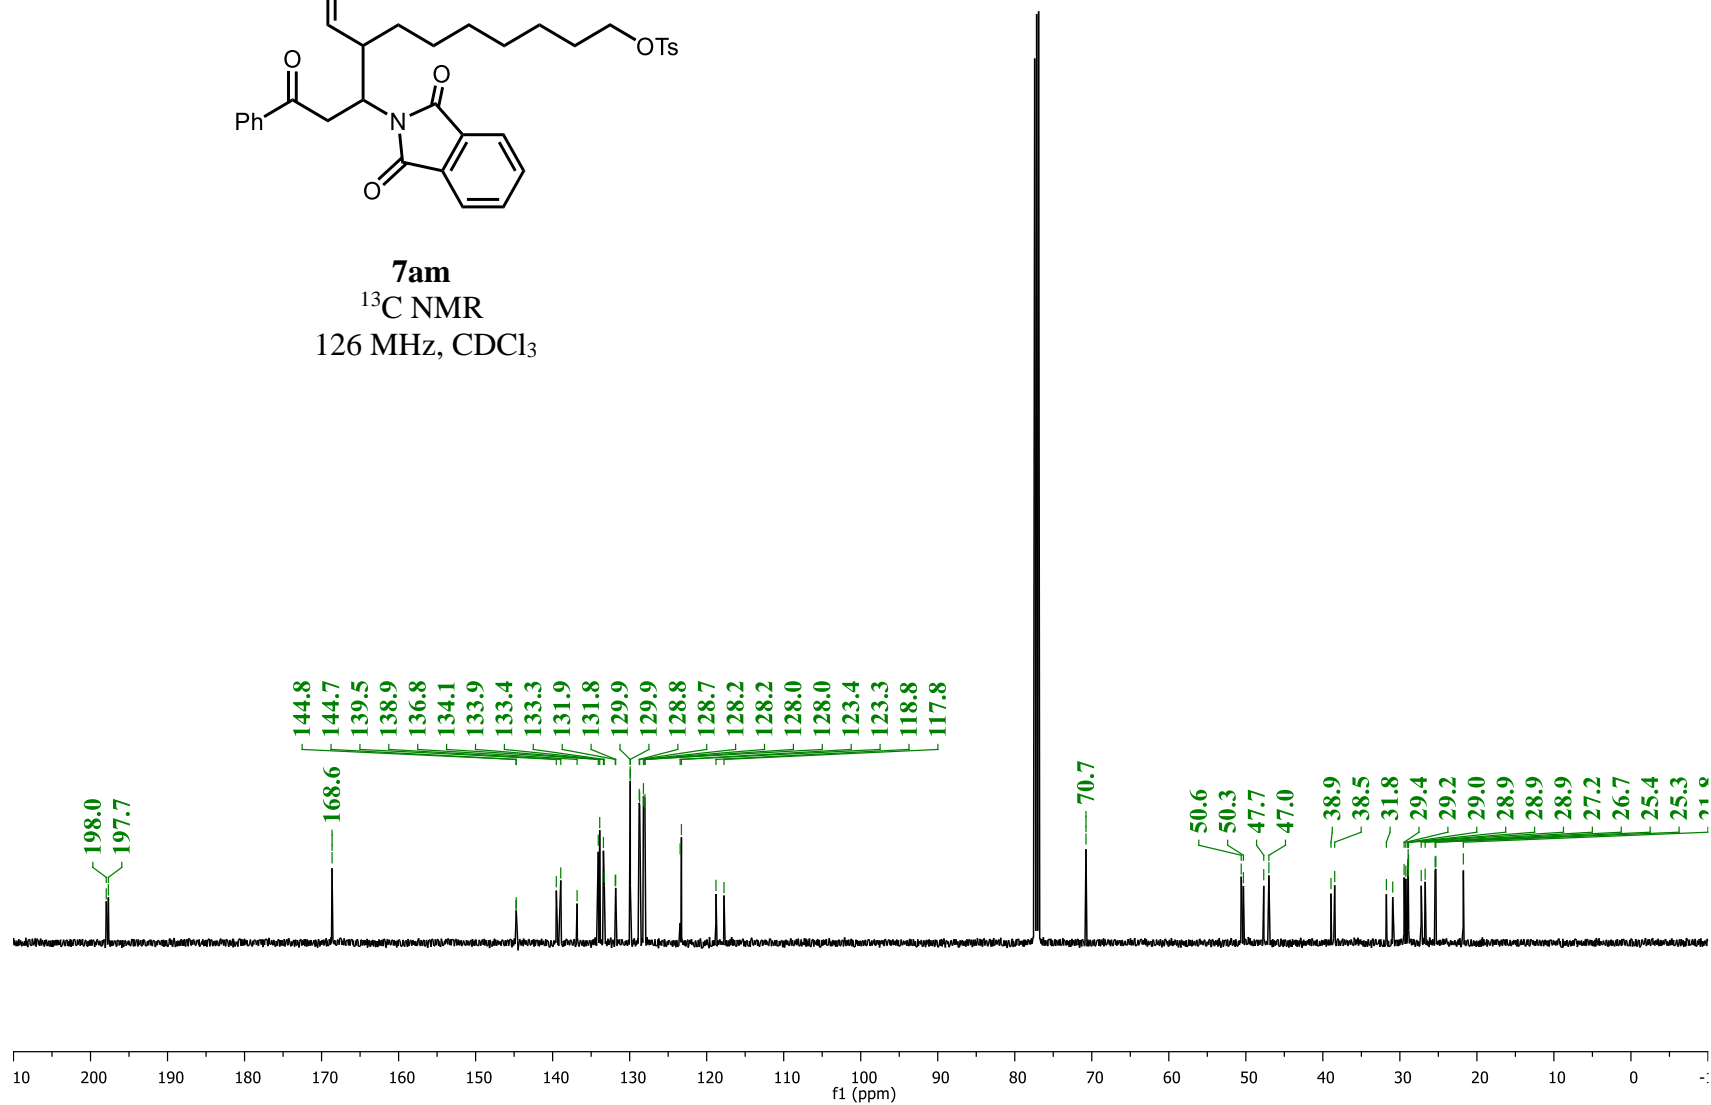

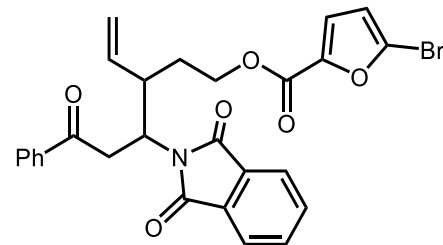

**7an**  
<sup>1</sup>H NMR  
 500 MHz, CDCl<sub>3</sub>

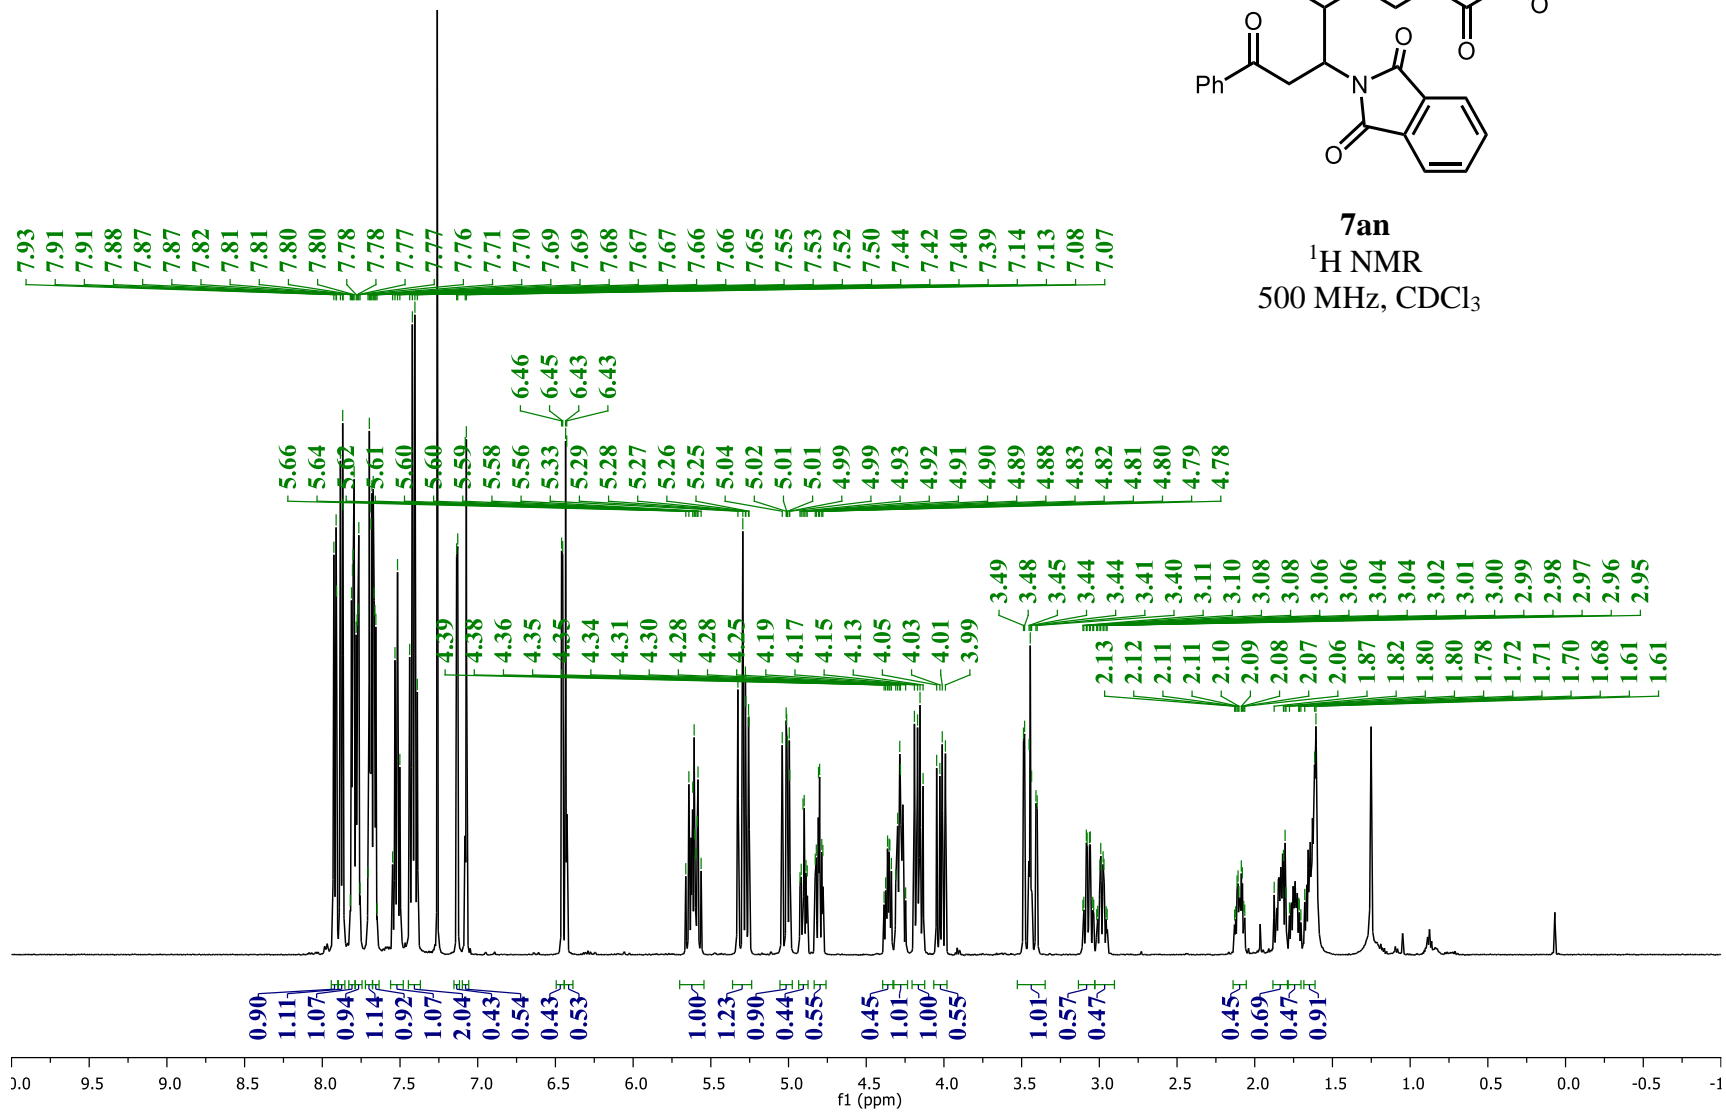

SG5-6-7 H

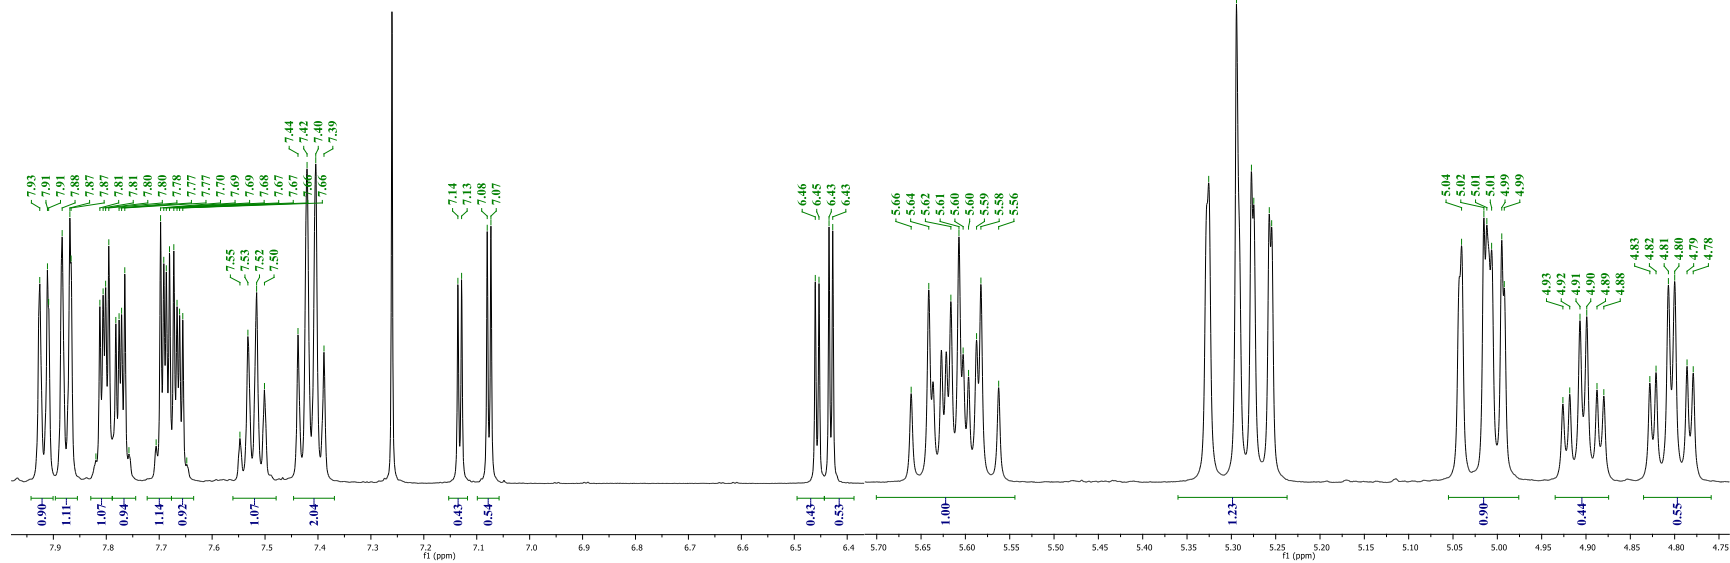

SG5-6-7 H

SG5-6-7 H

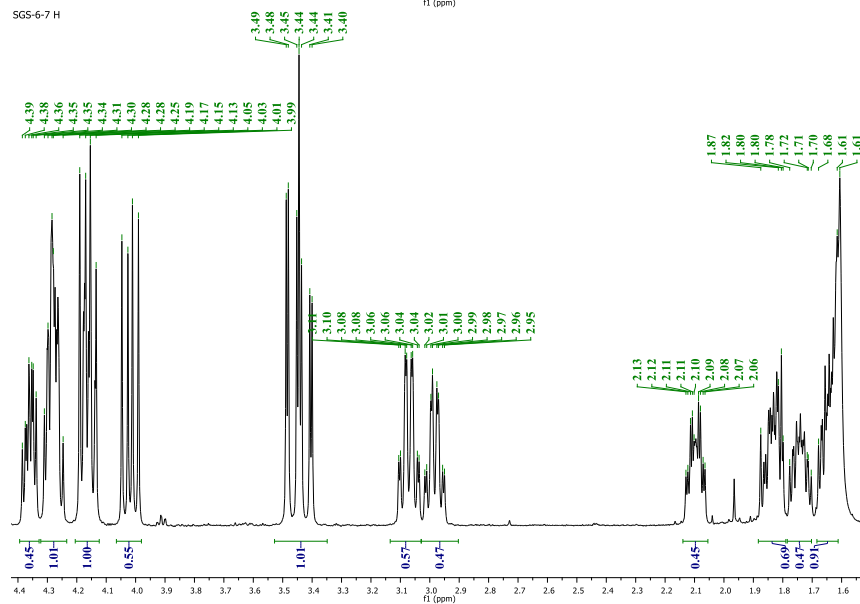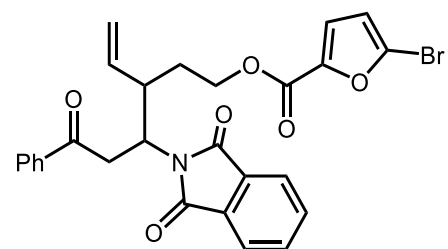

**7an**  
 $^1\text{H}$  NMR  
 500 MHz,  $\text{CDCl}_3$

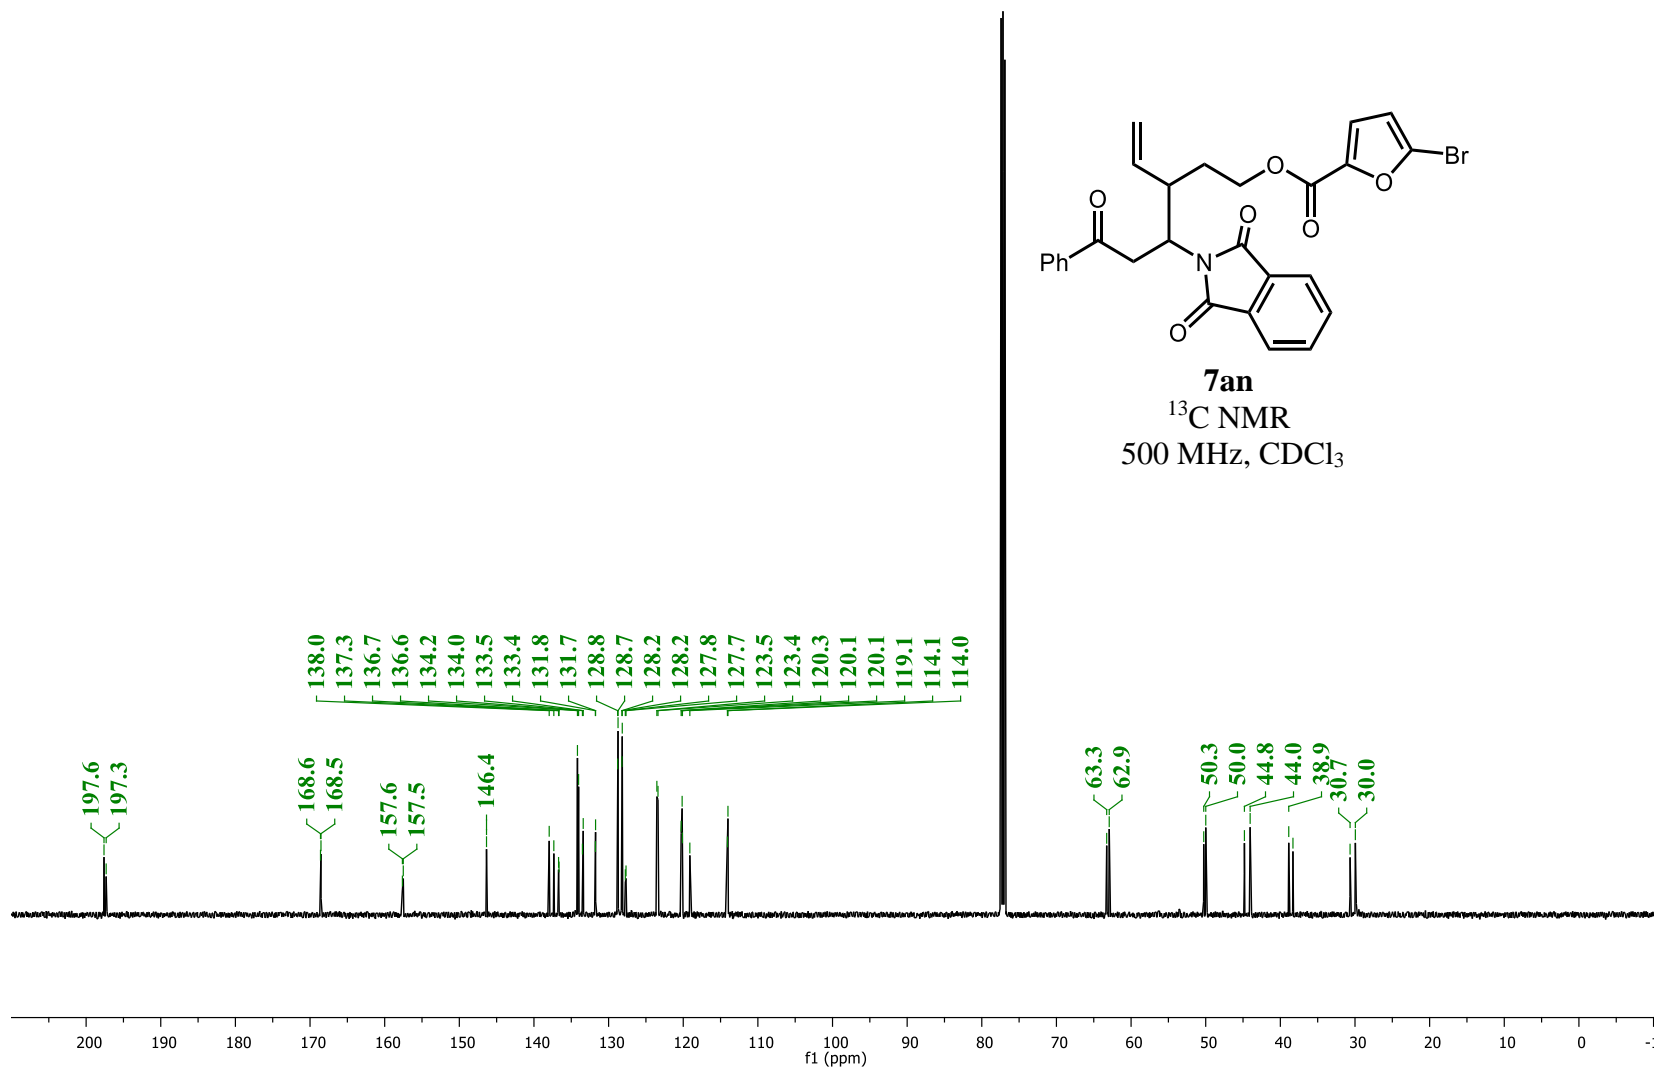

SGS-6-53 H

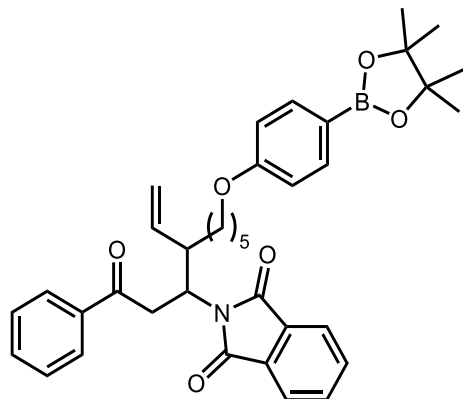

**7ao**  
<sup>1</sup>H NMR  
500 MHz, CDCl<sub>3</sub>

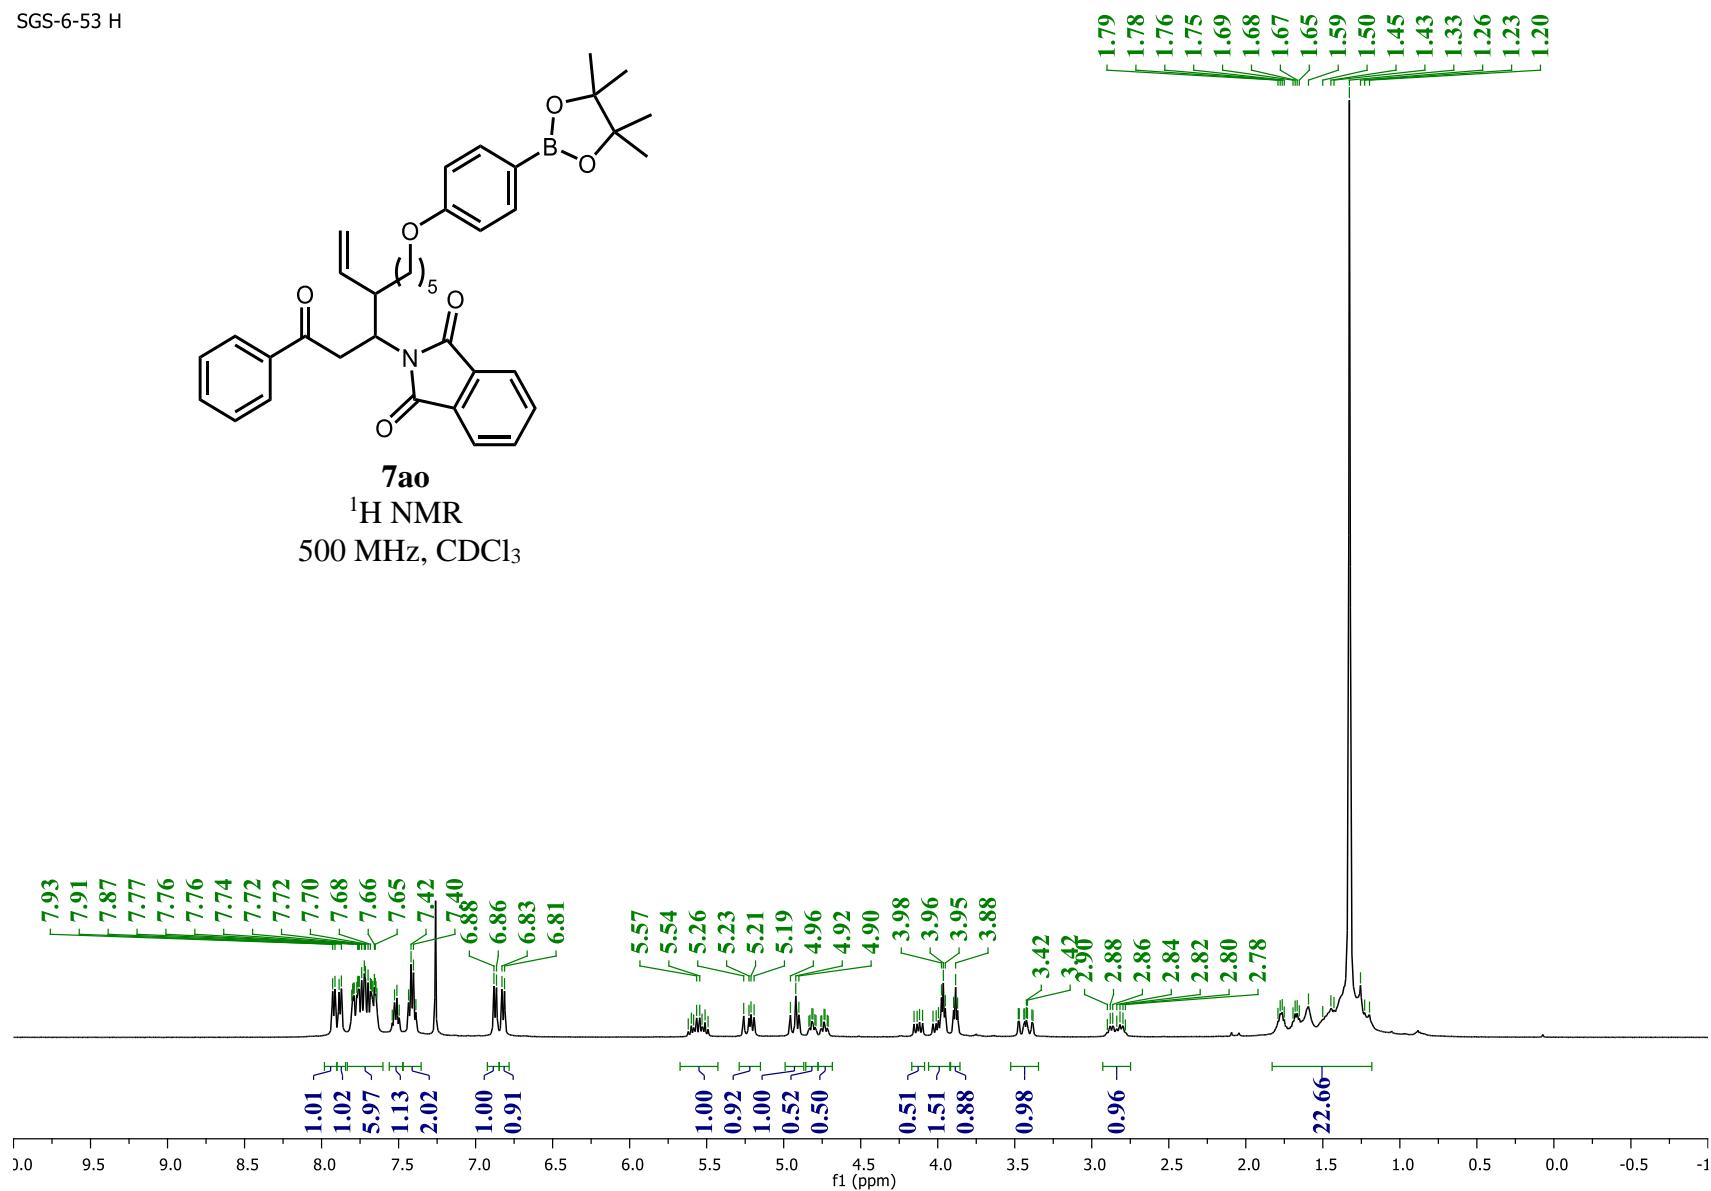



SG5-6-53 H

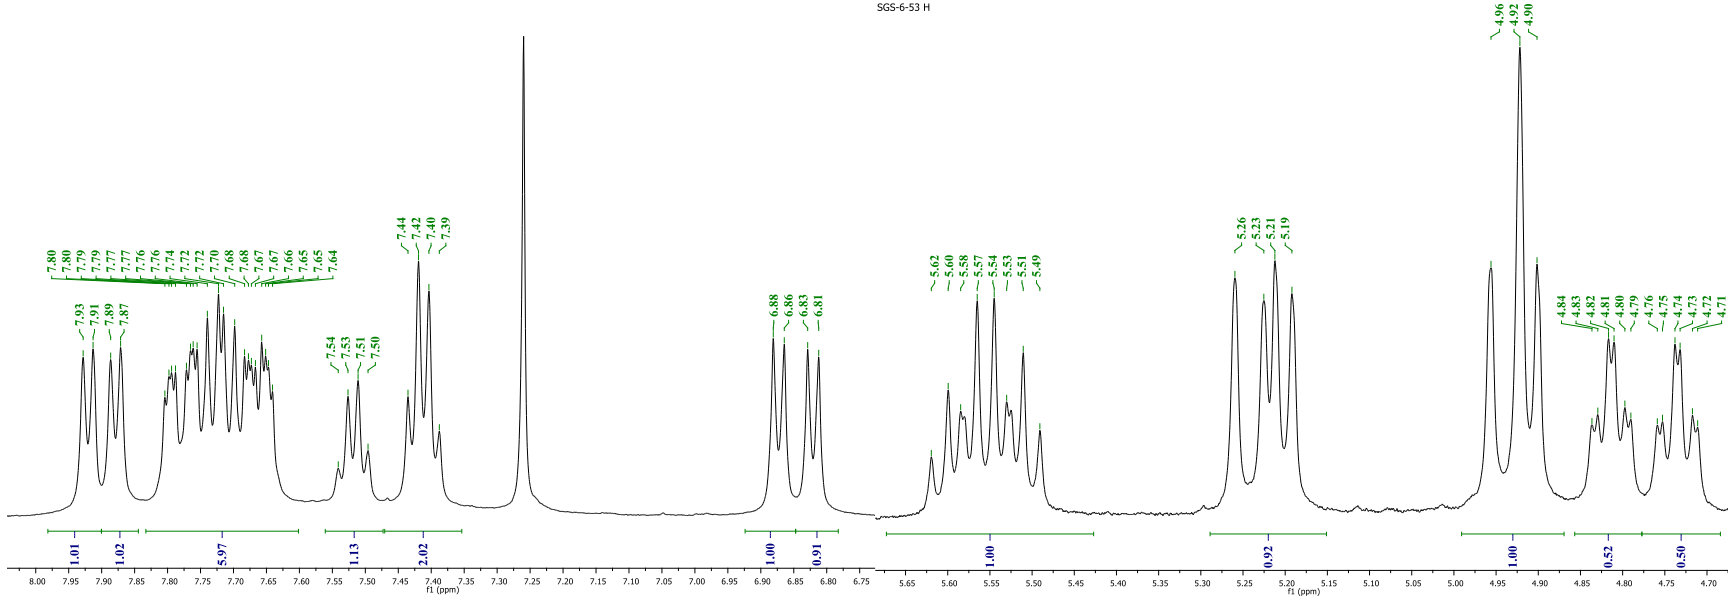

SG5-6-53 H

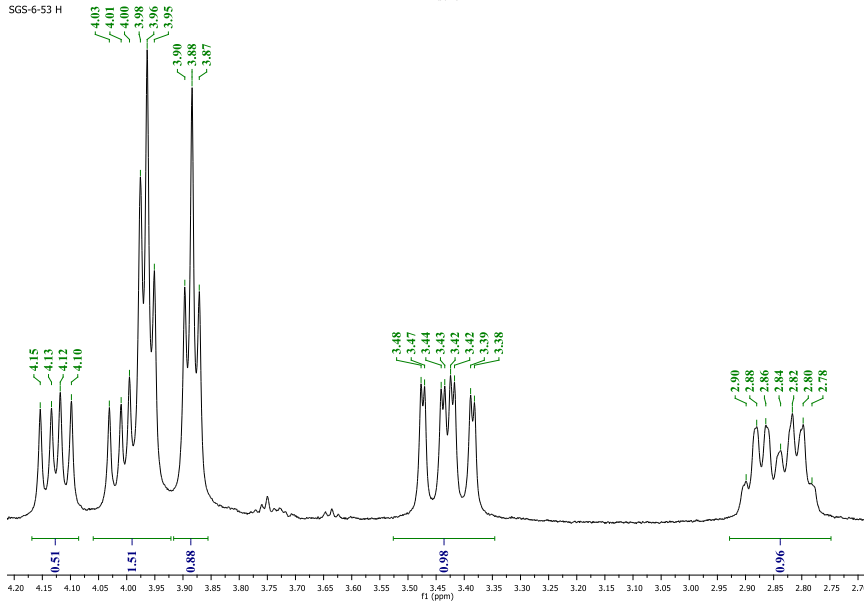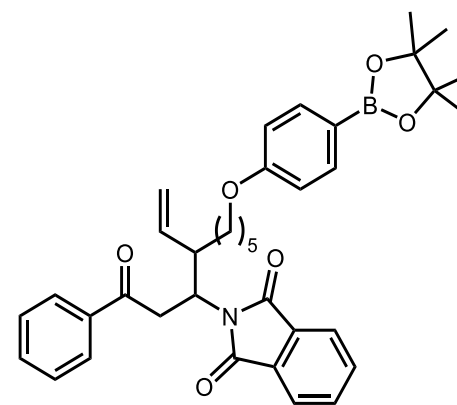

**7ao**  
<sup>1</sup>H NMR  
 500 MHz, CDCl<sub>3</sub>

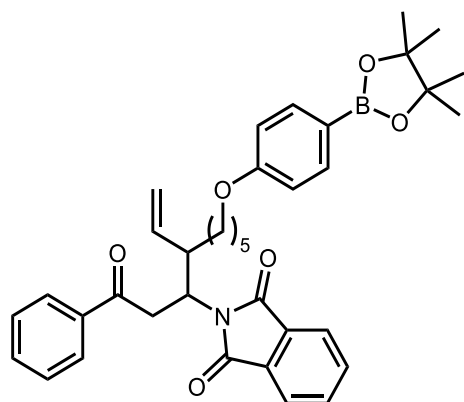

**7ao**  
<sup>13</sup>C NMR  
 126 MHz, CDCl<sub>3</sub>

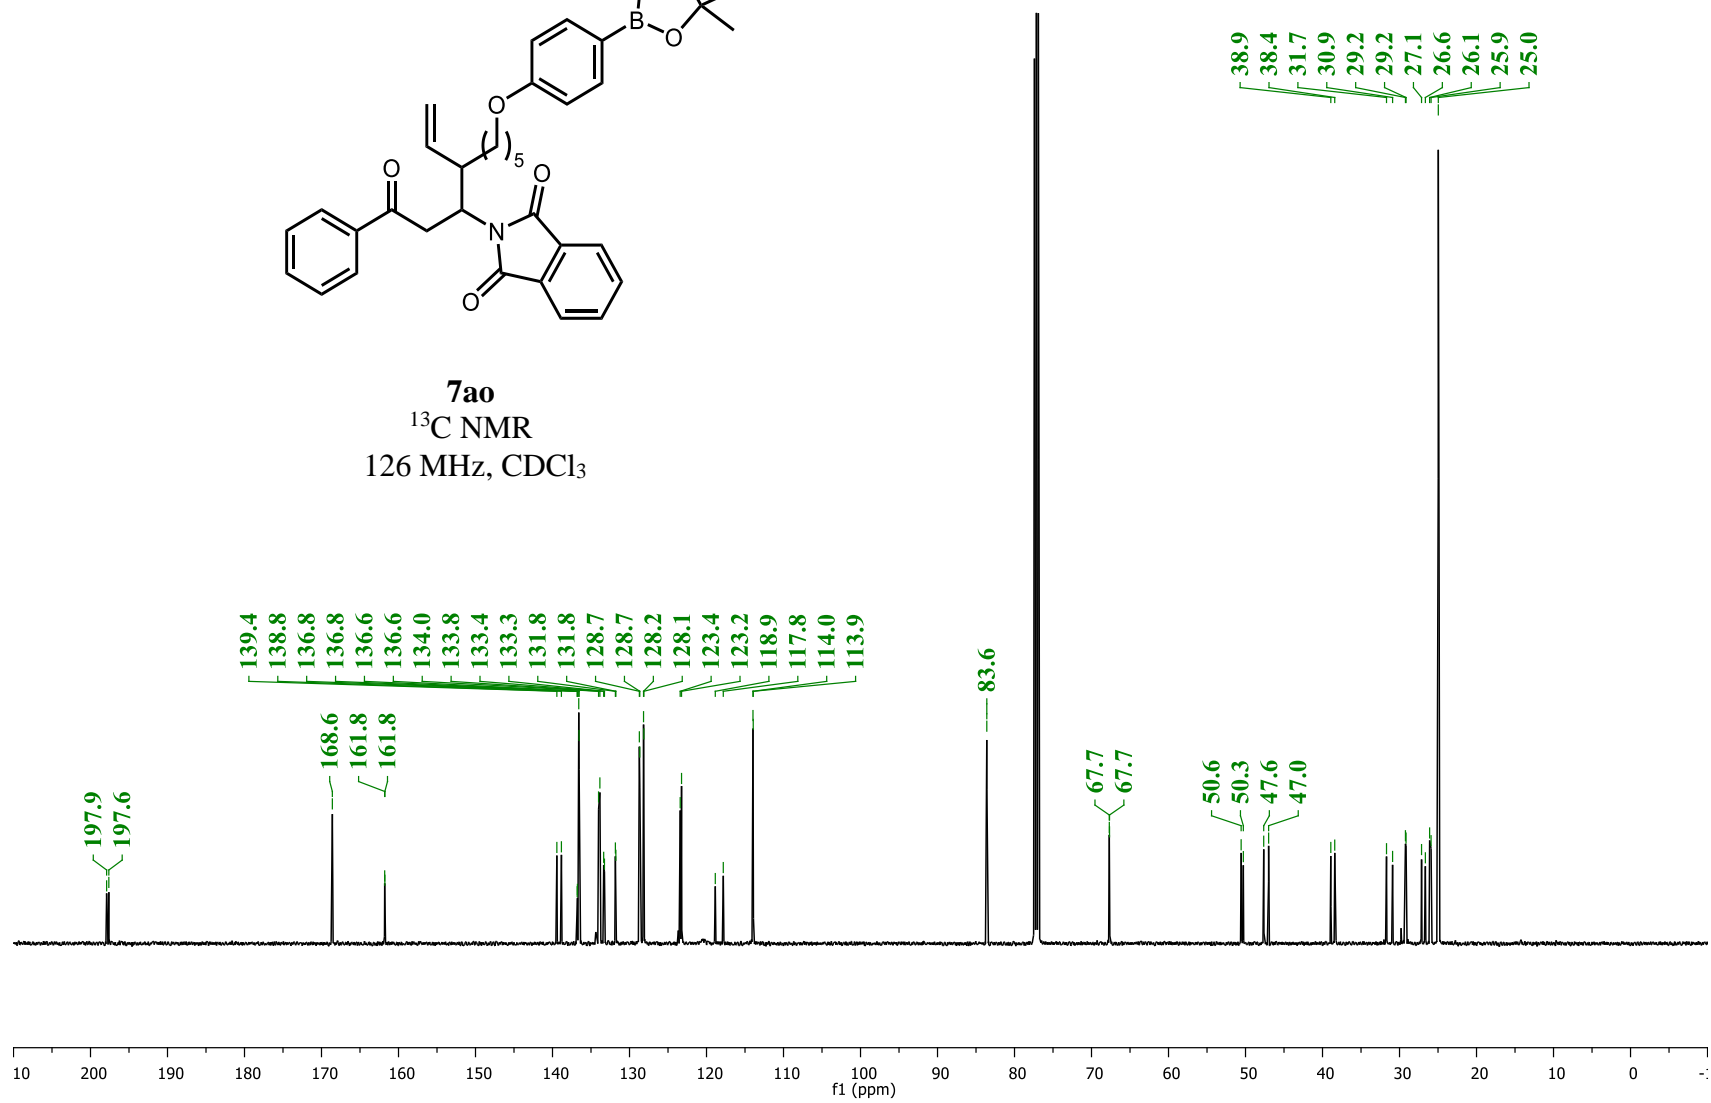

SGS-6-8 H

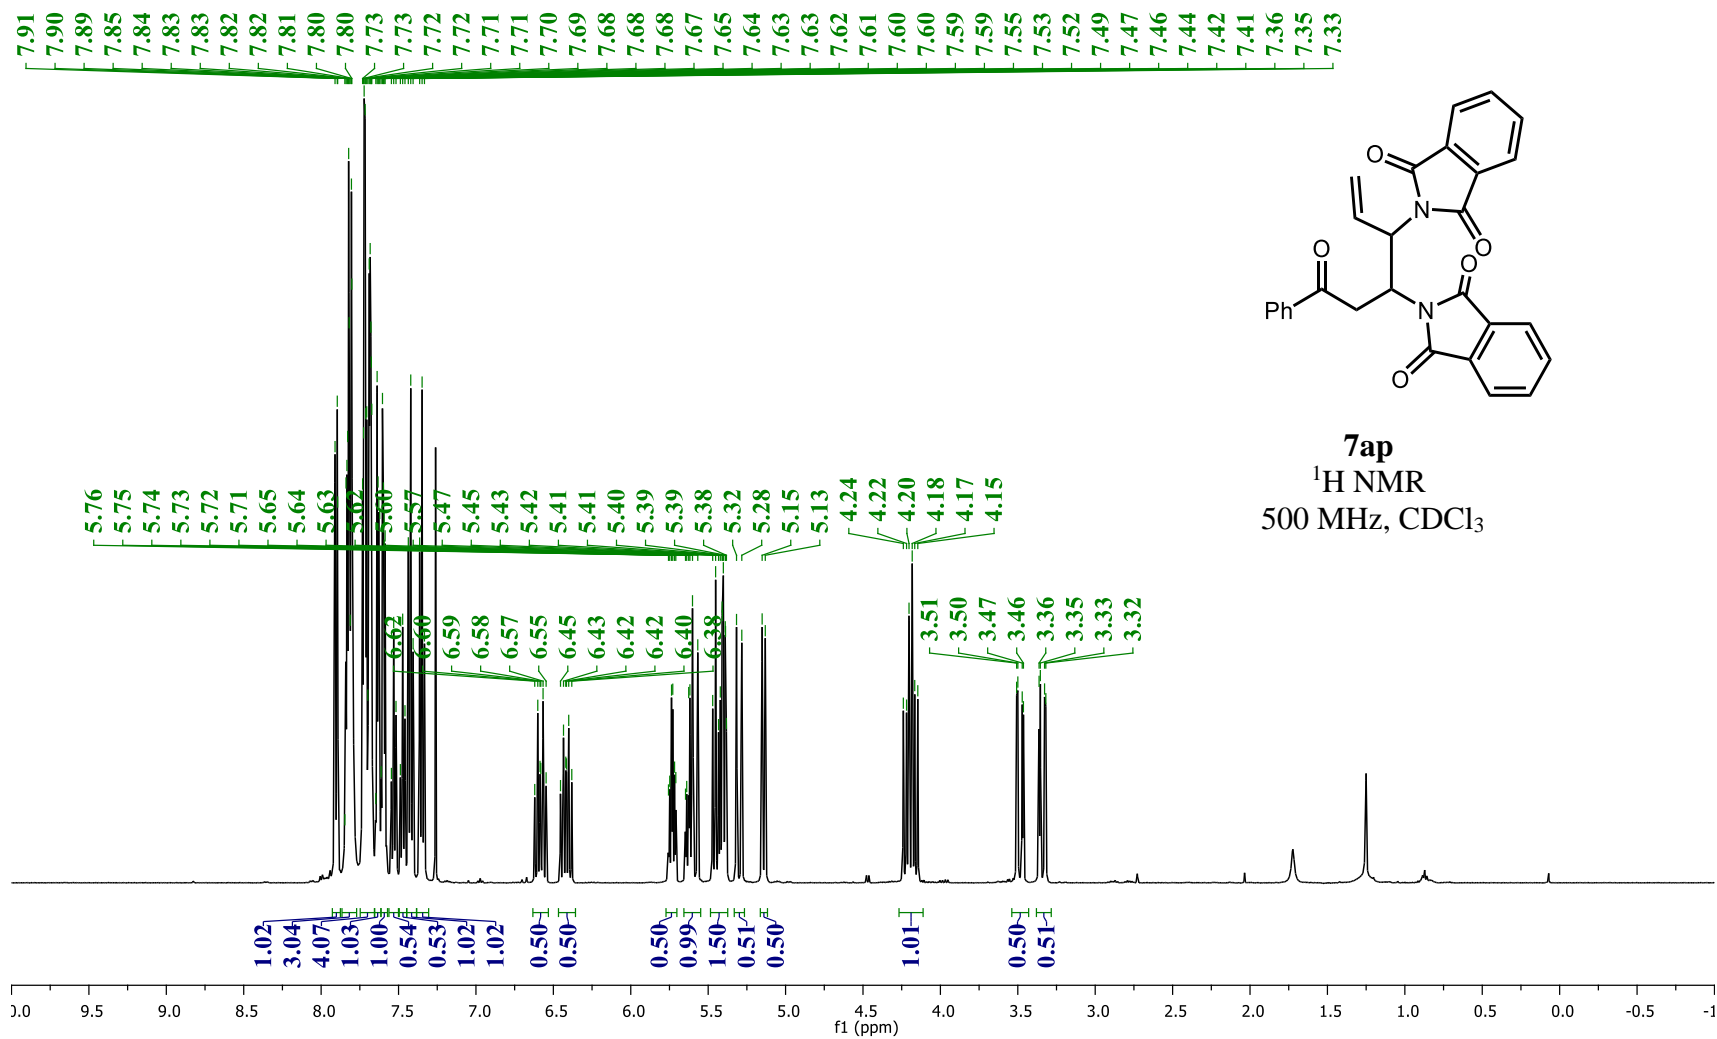

S159

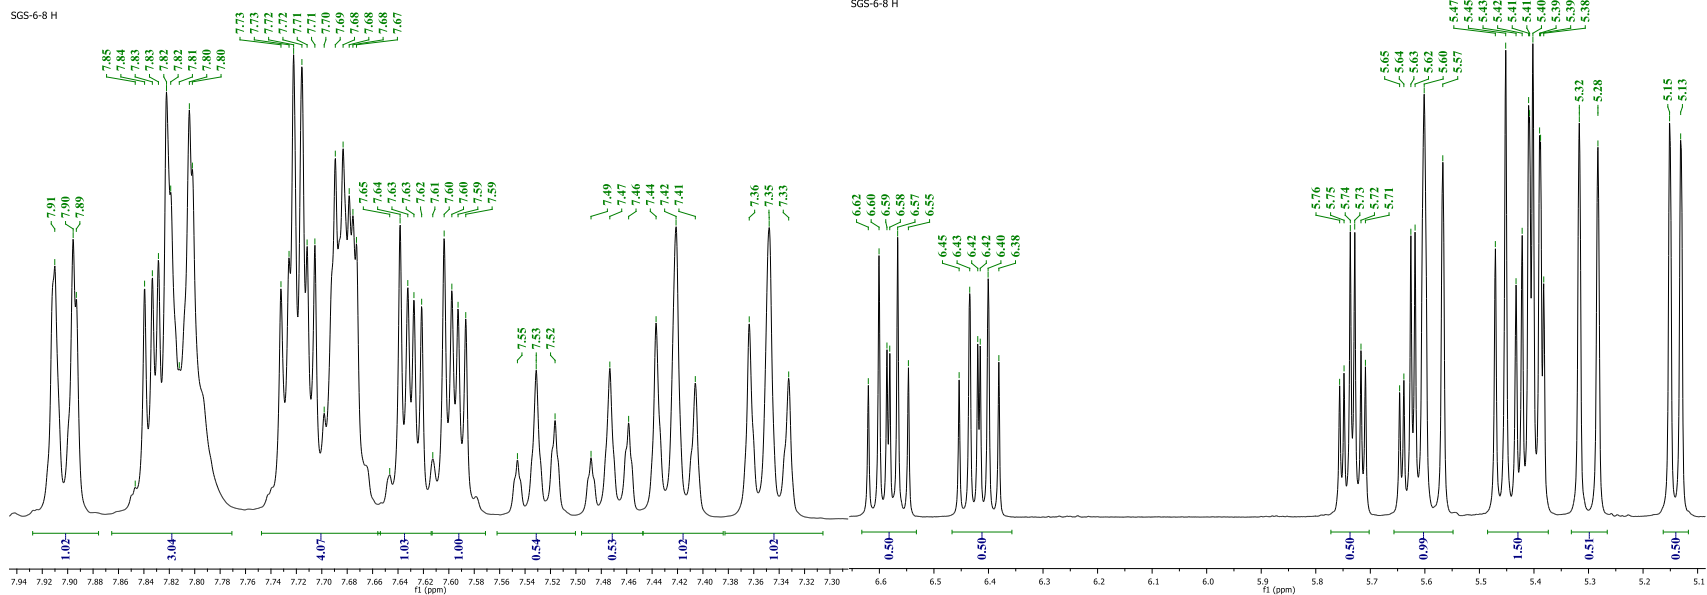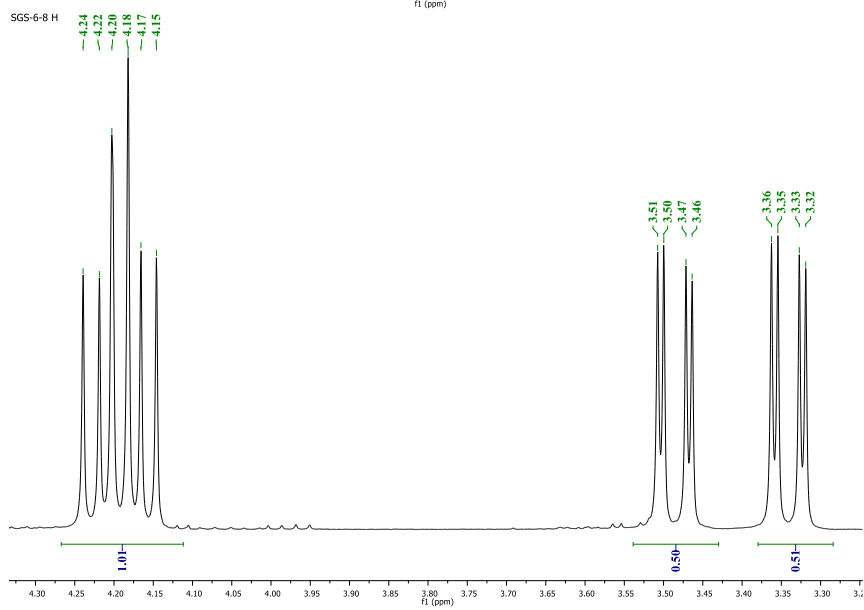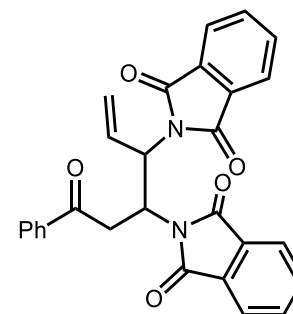

**7ap**  
 $^1\text{H}$  NMR  
 500 MHz,  $\text{CDCl}_3$

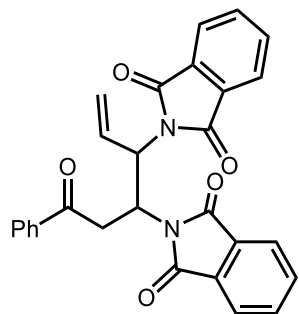

**7ap**

COSY NMR - aromatic  
500 MHz, CDCl<sub>3</sub>

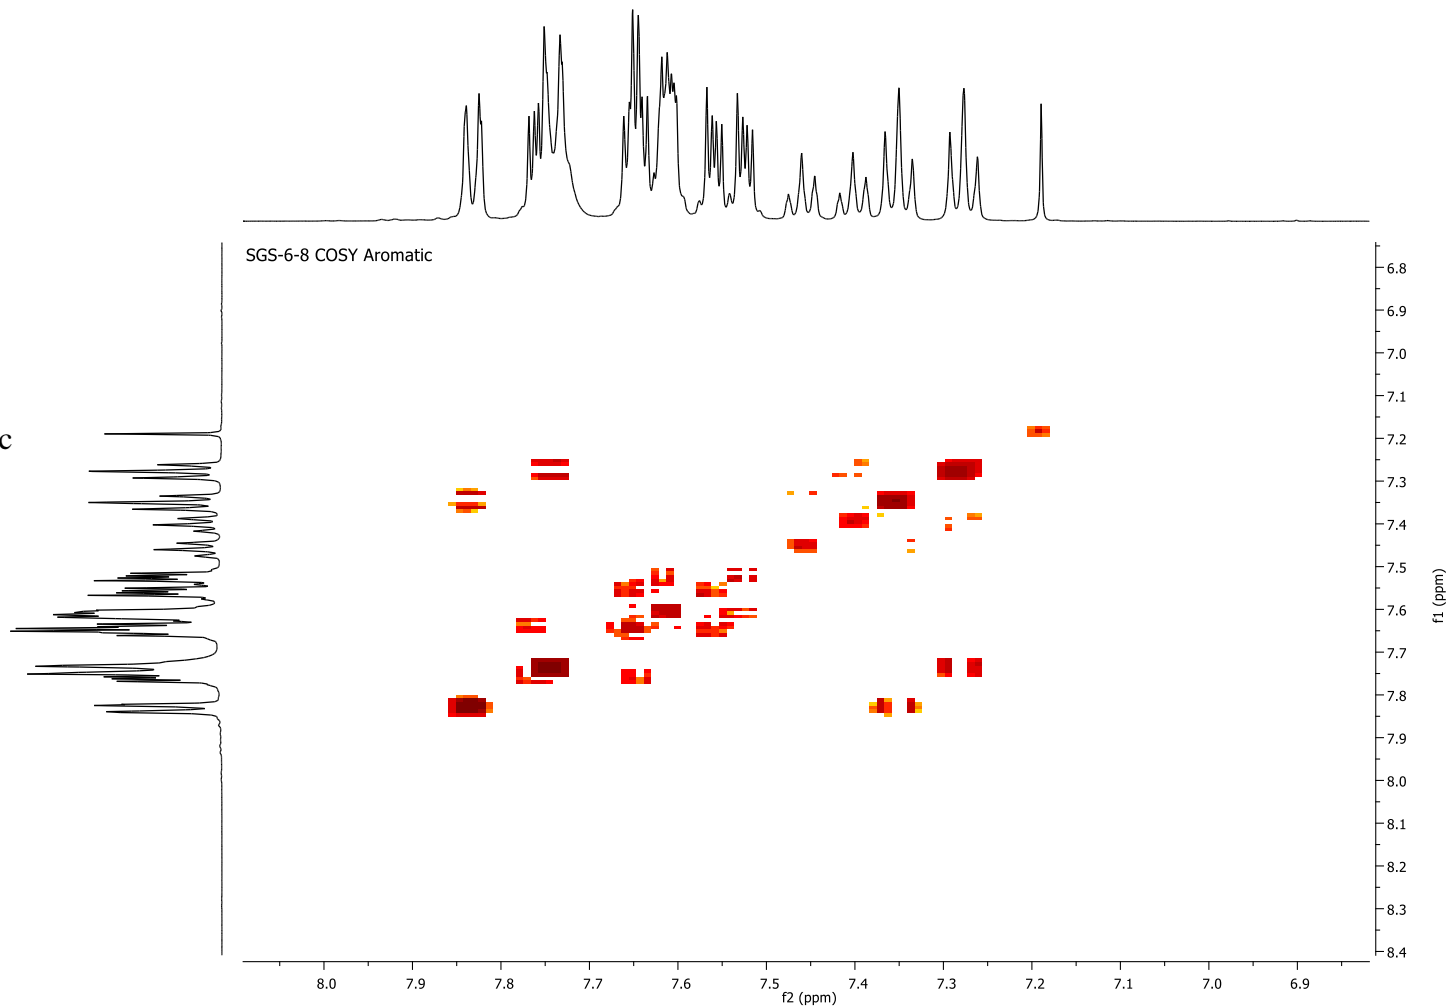

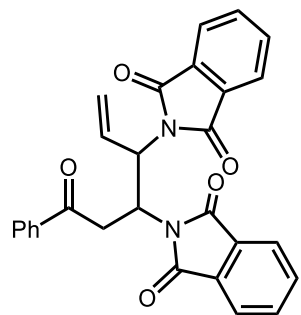

**7ap**

COSY NMR - aliphatic  
500 MHz, CDCl<sub>3</sub>

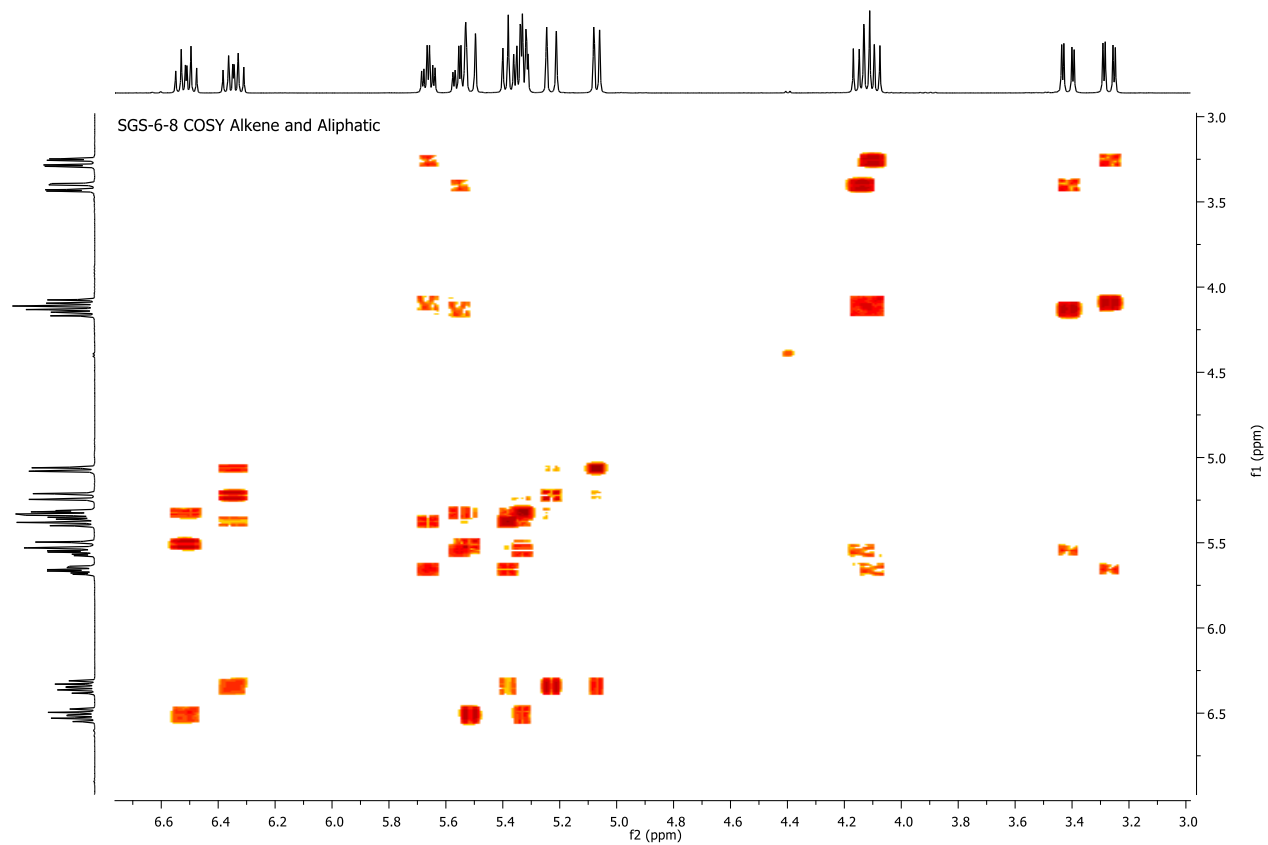

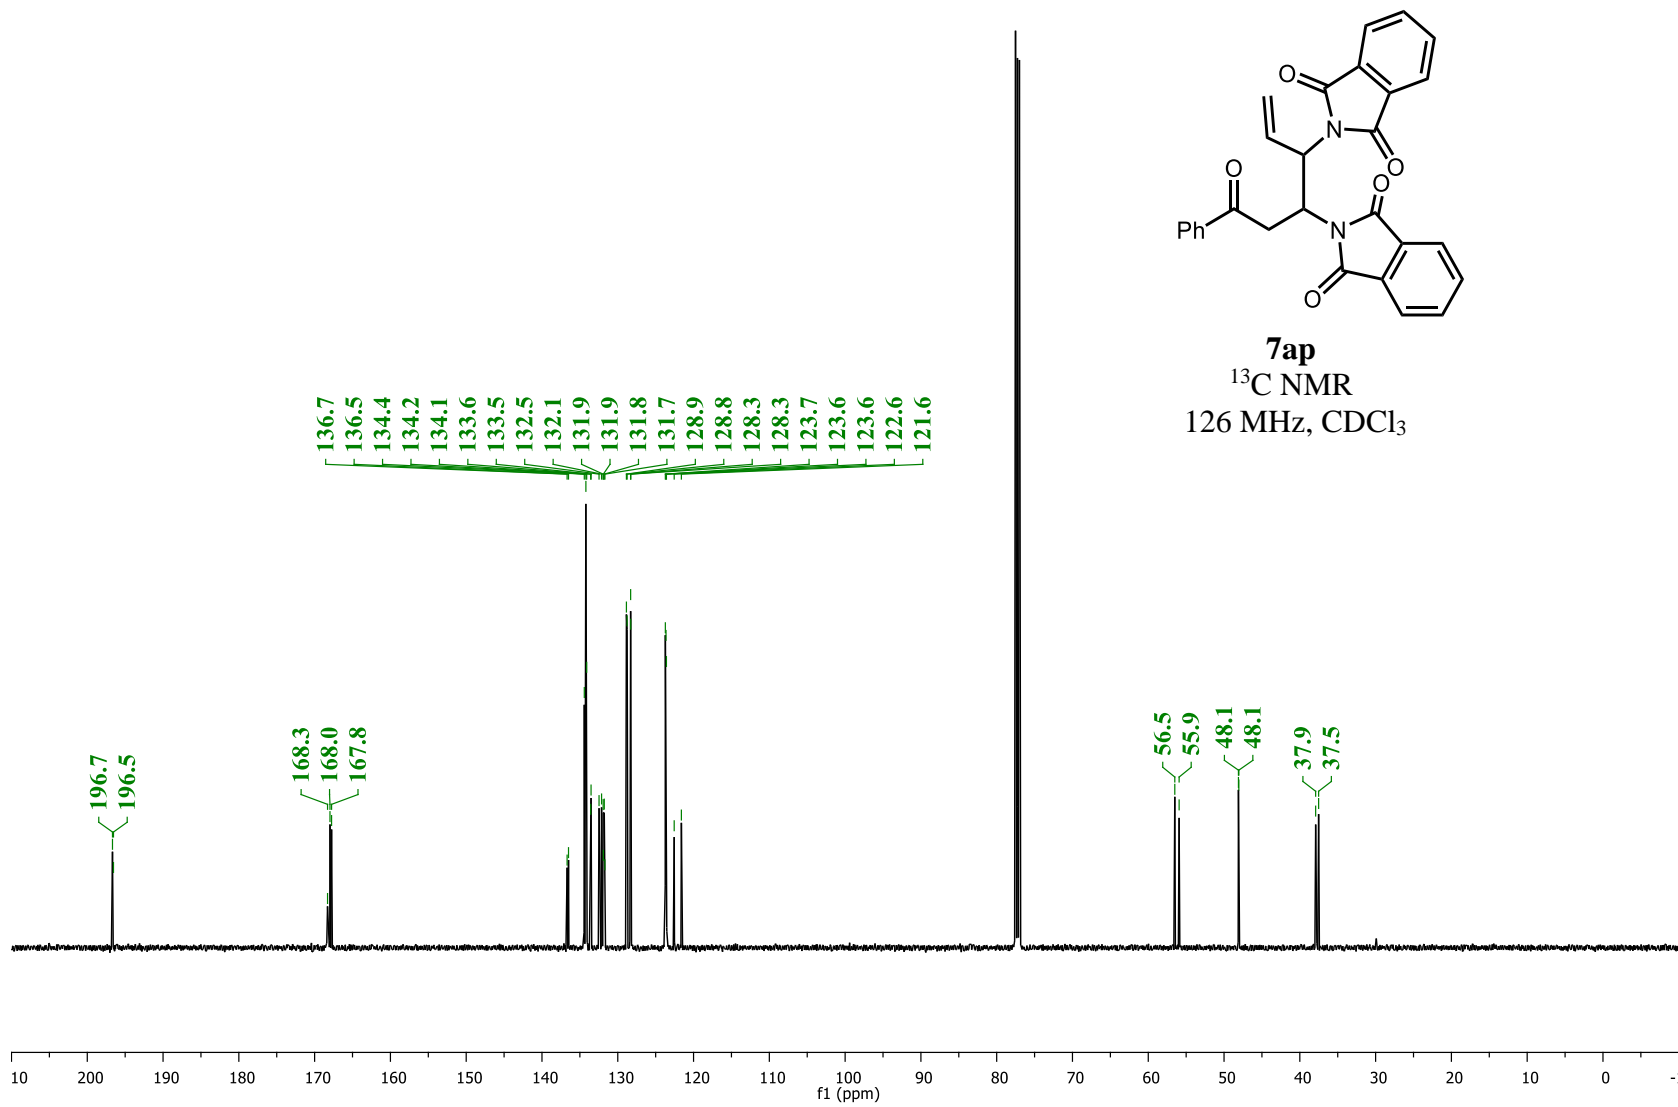





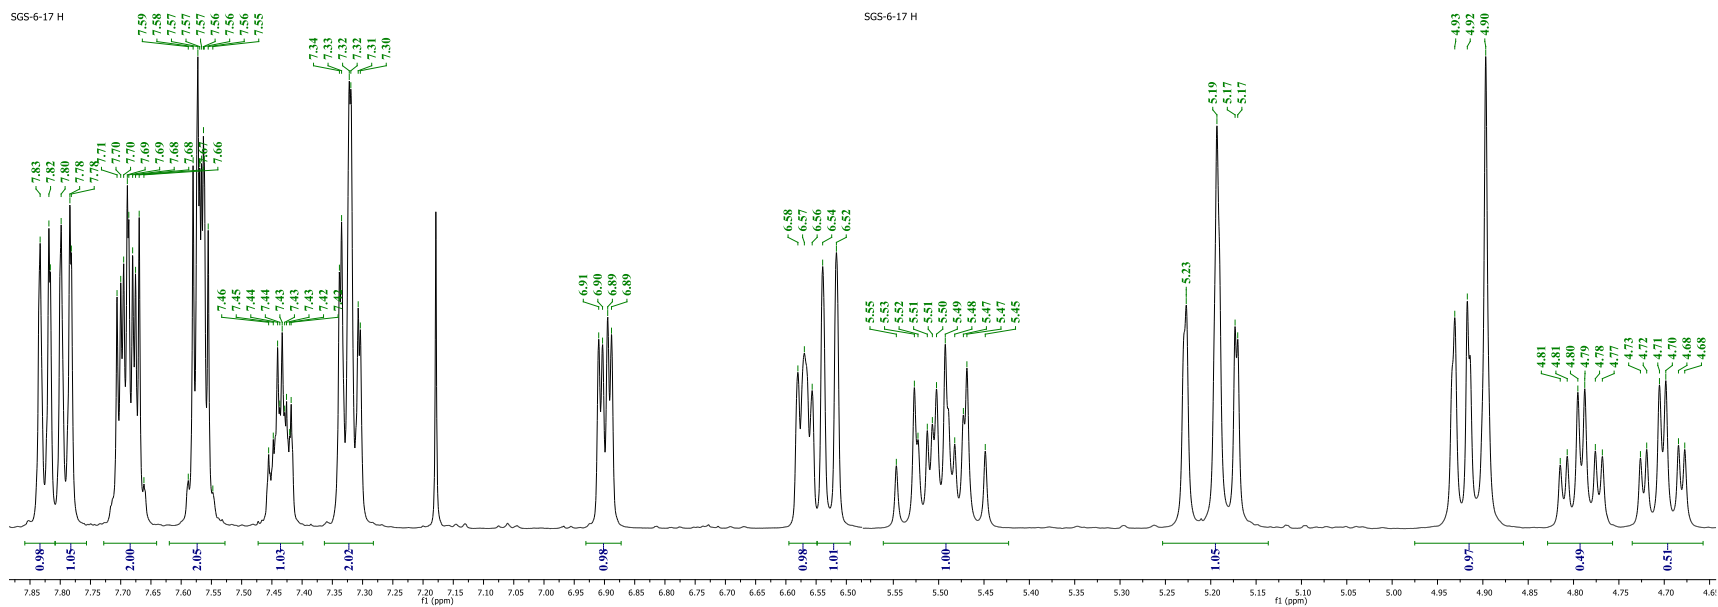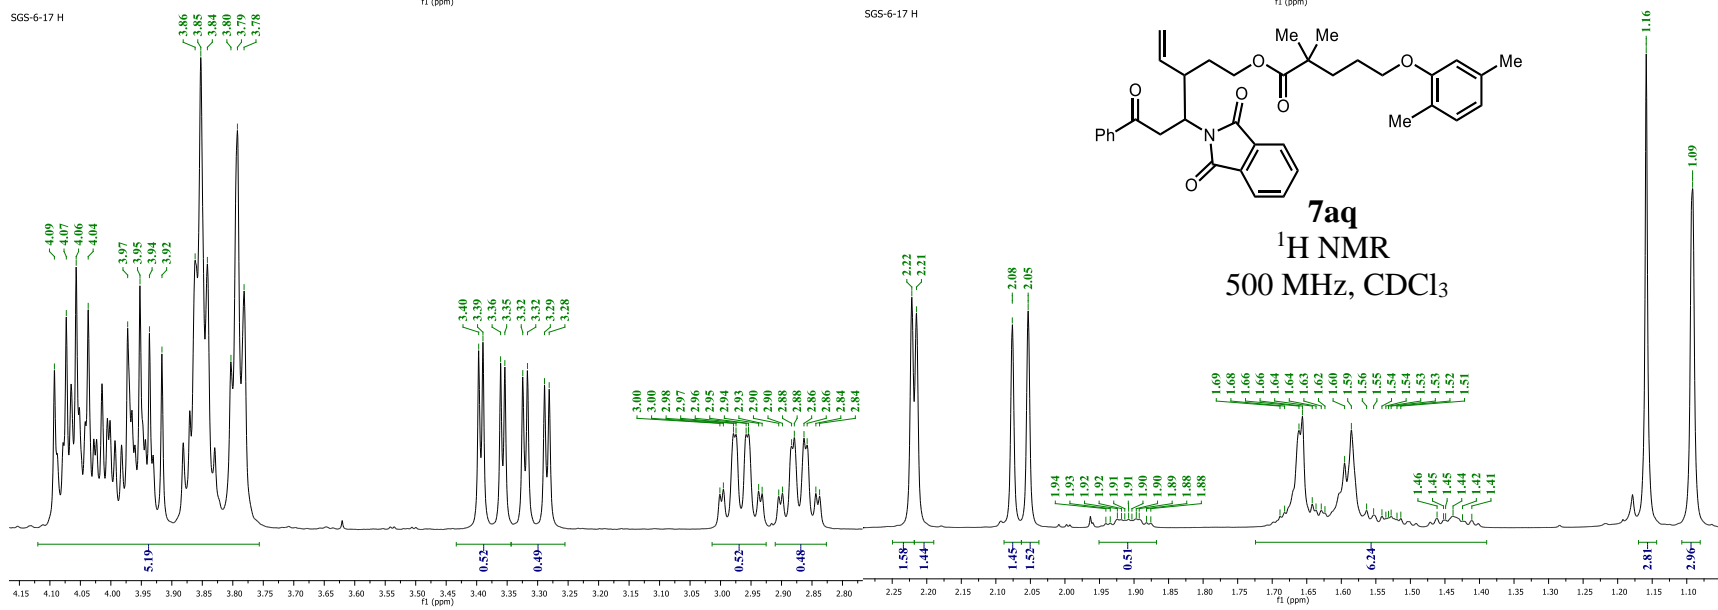

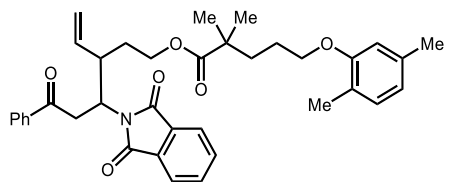

**7aq**  
COSY NMR - aliphatic  
500 MHz, CDCl<sub>3</sub>

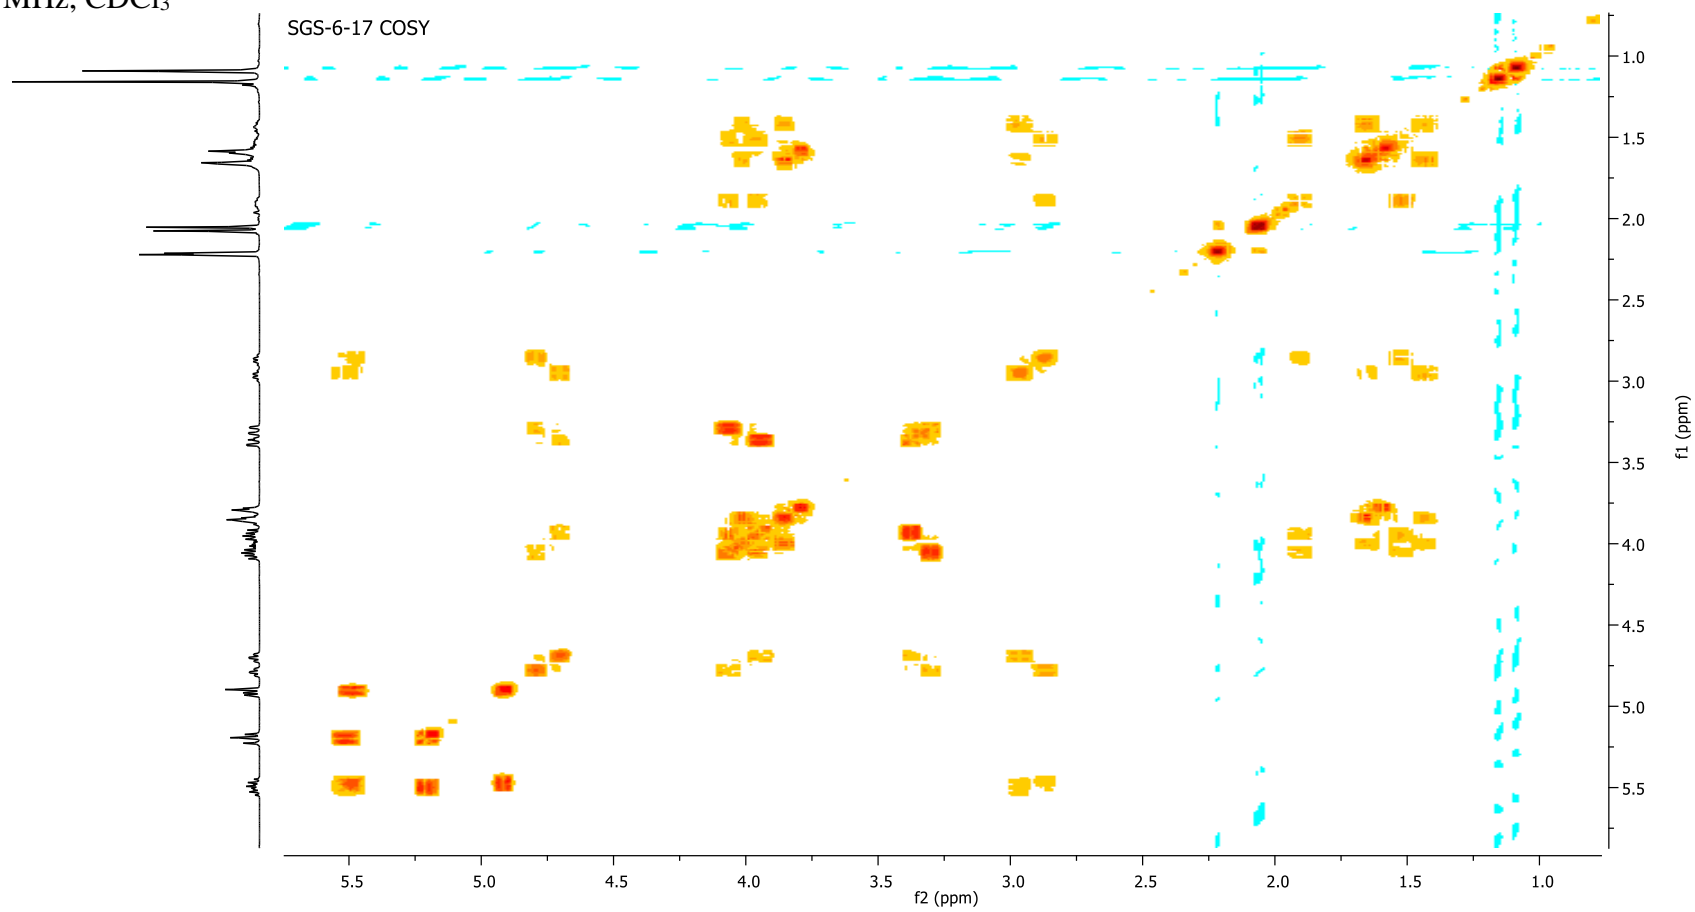

## 7.4 NMR spectra: Sulfonamide Scope

SGS-5-184 H

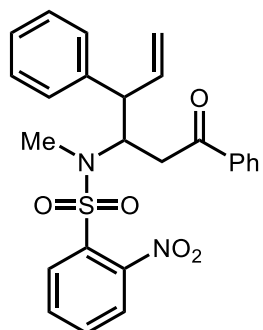

**9aa**

<sup>1</sup>H NMR  
500 MHz, CDCl<sub>3</sub>

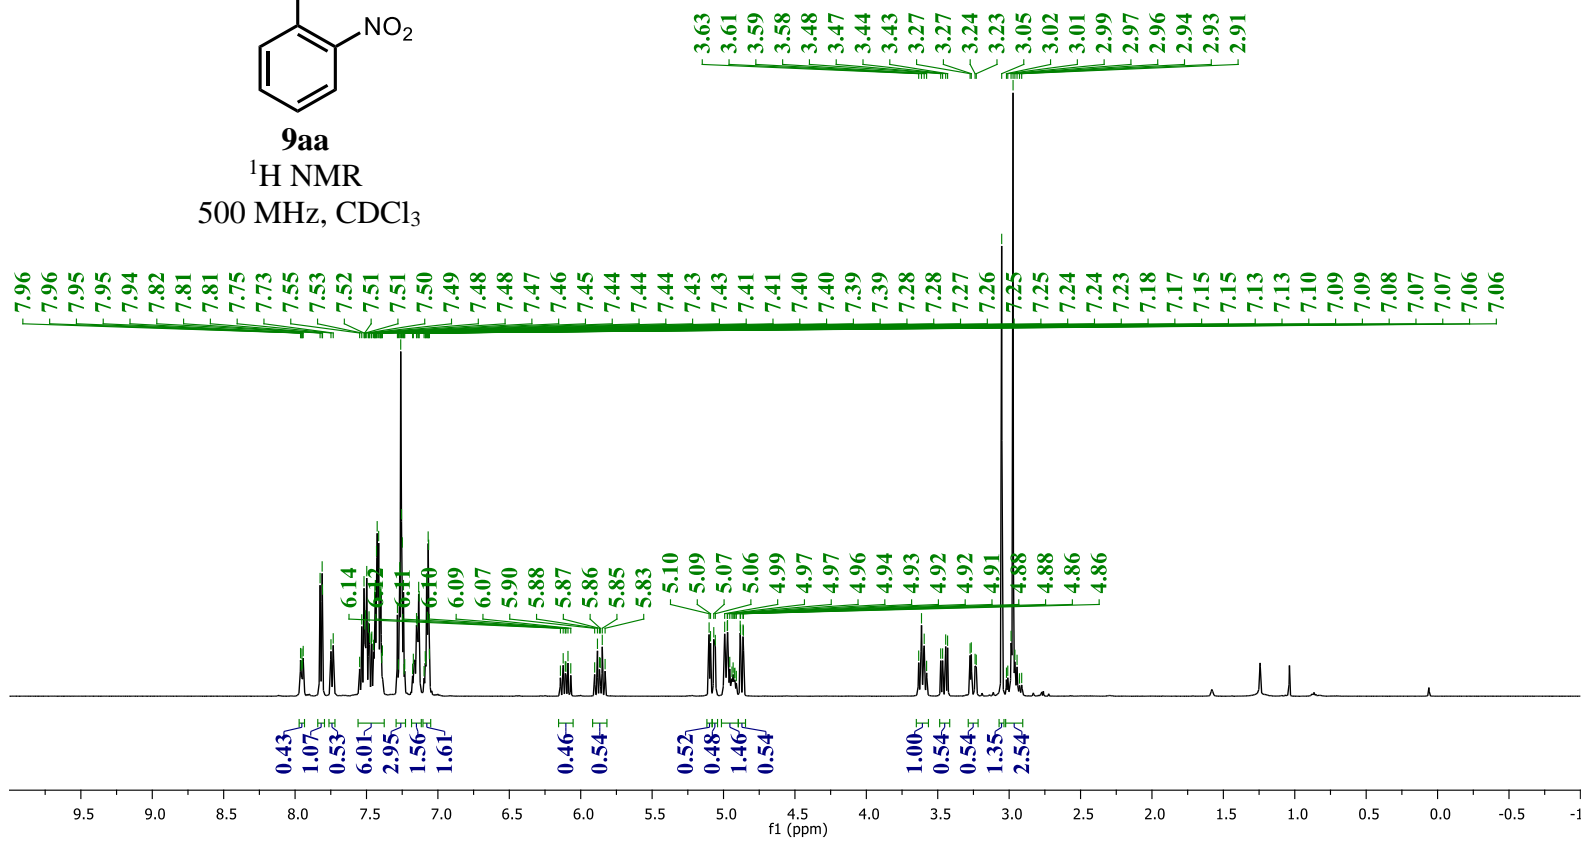

SGS-5-184 H

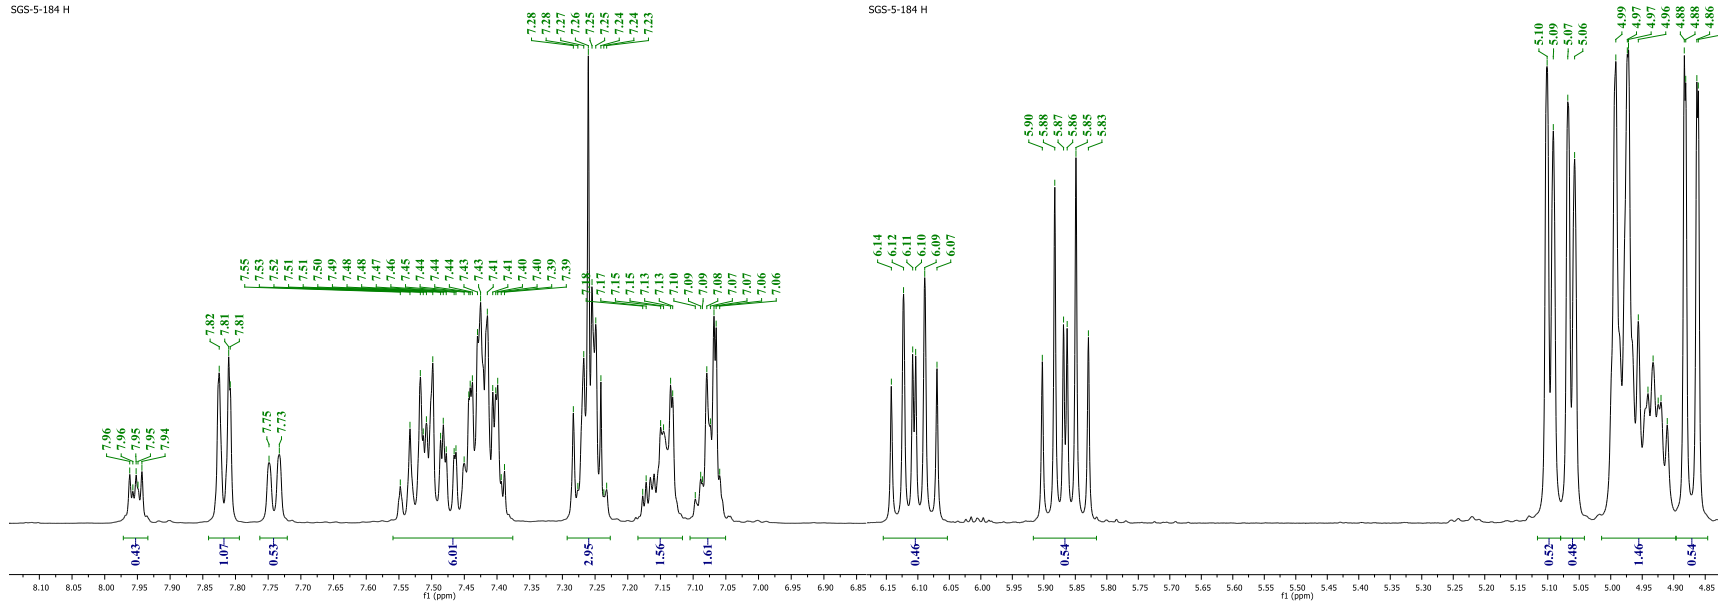

SGS-5-184 H

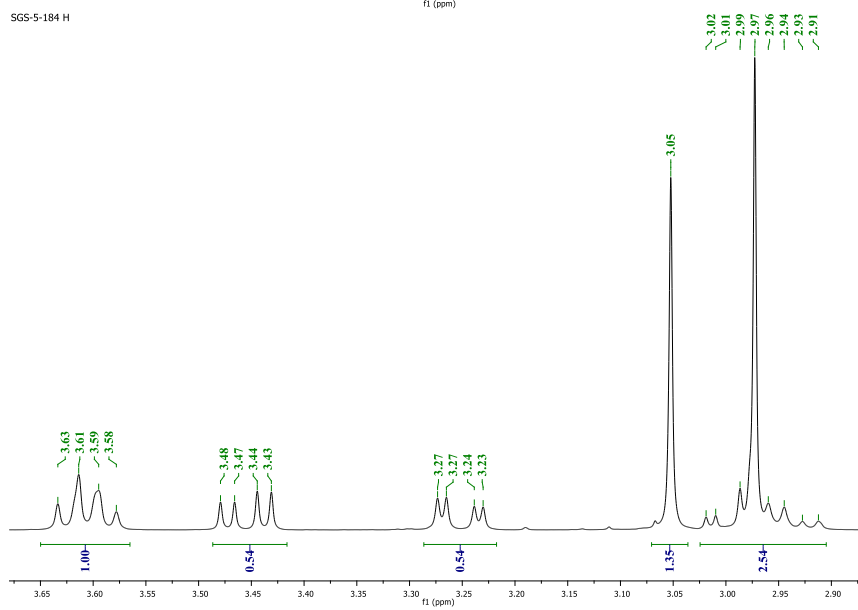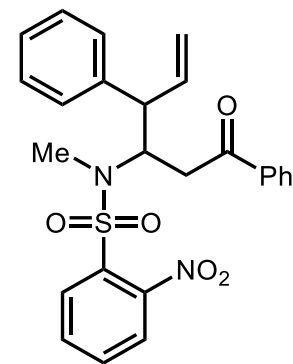

**9aa**  
<sup>1</sup>H NMR  
 500 MHz, CDCl<sub>3</sub>

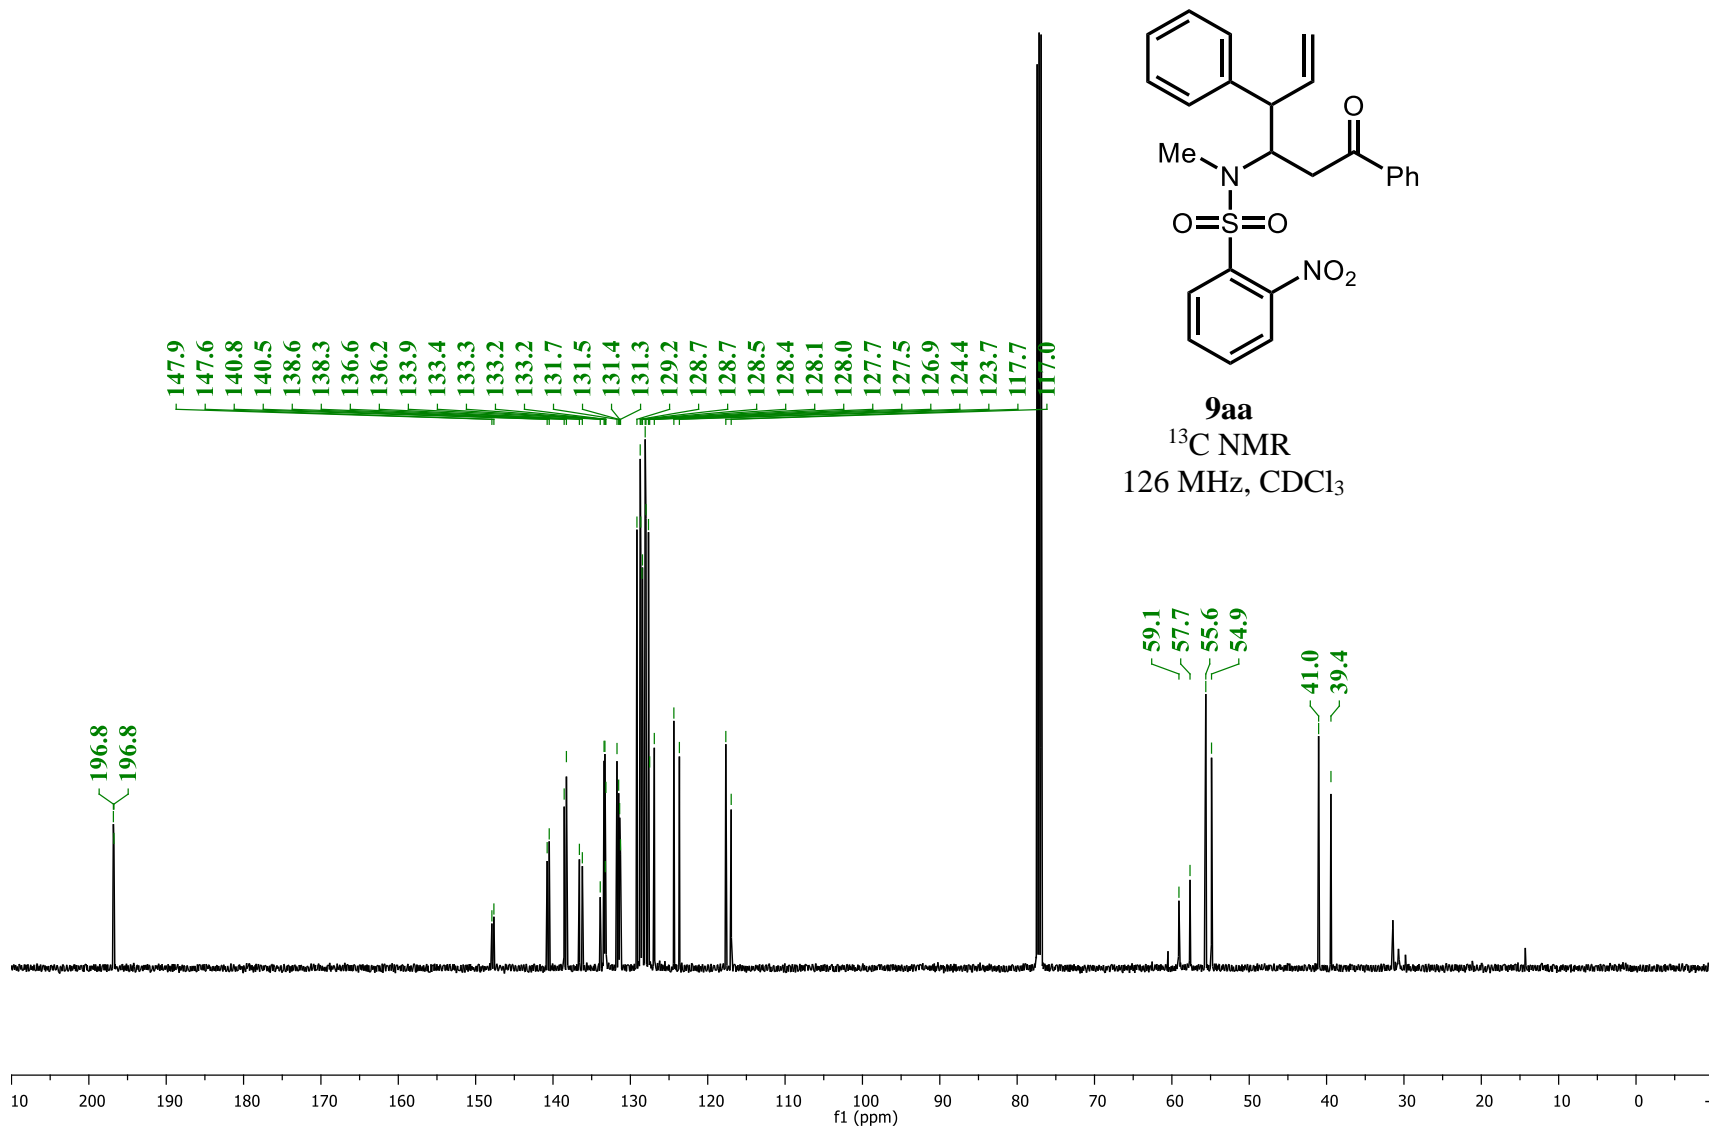

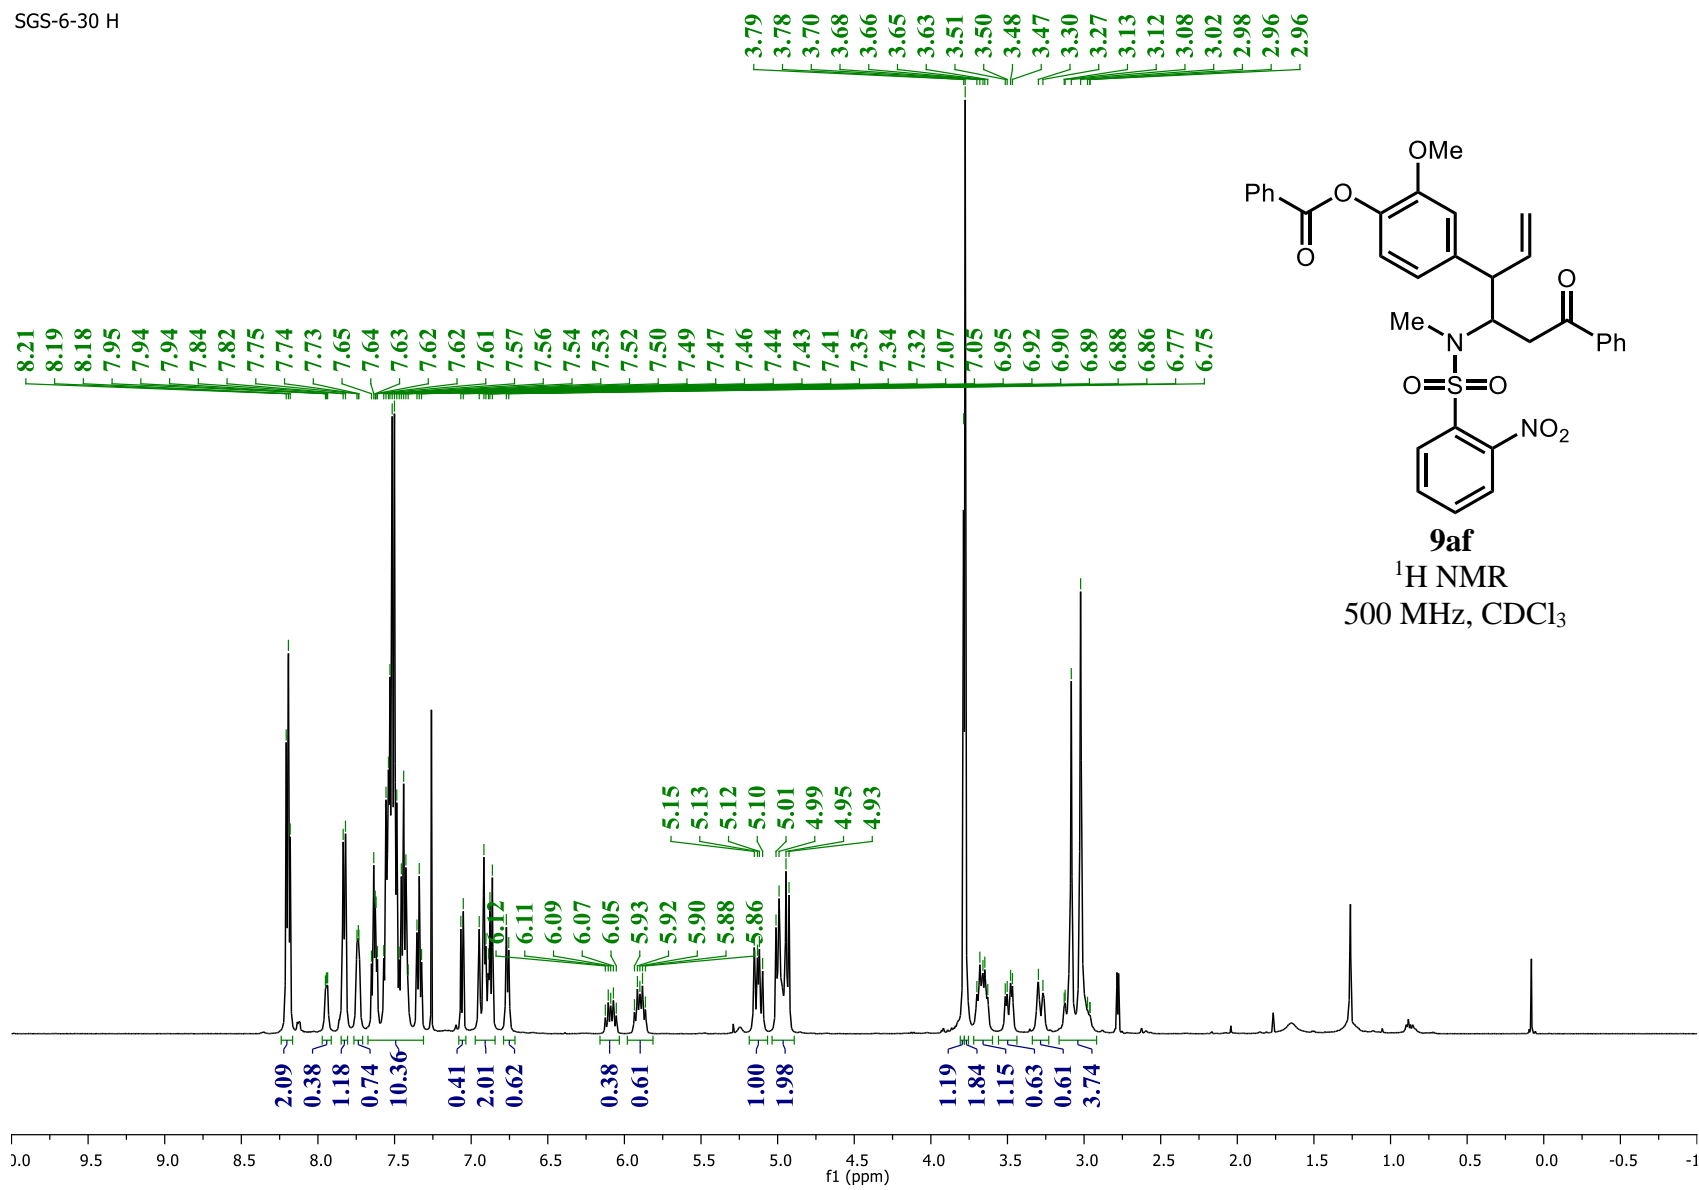

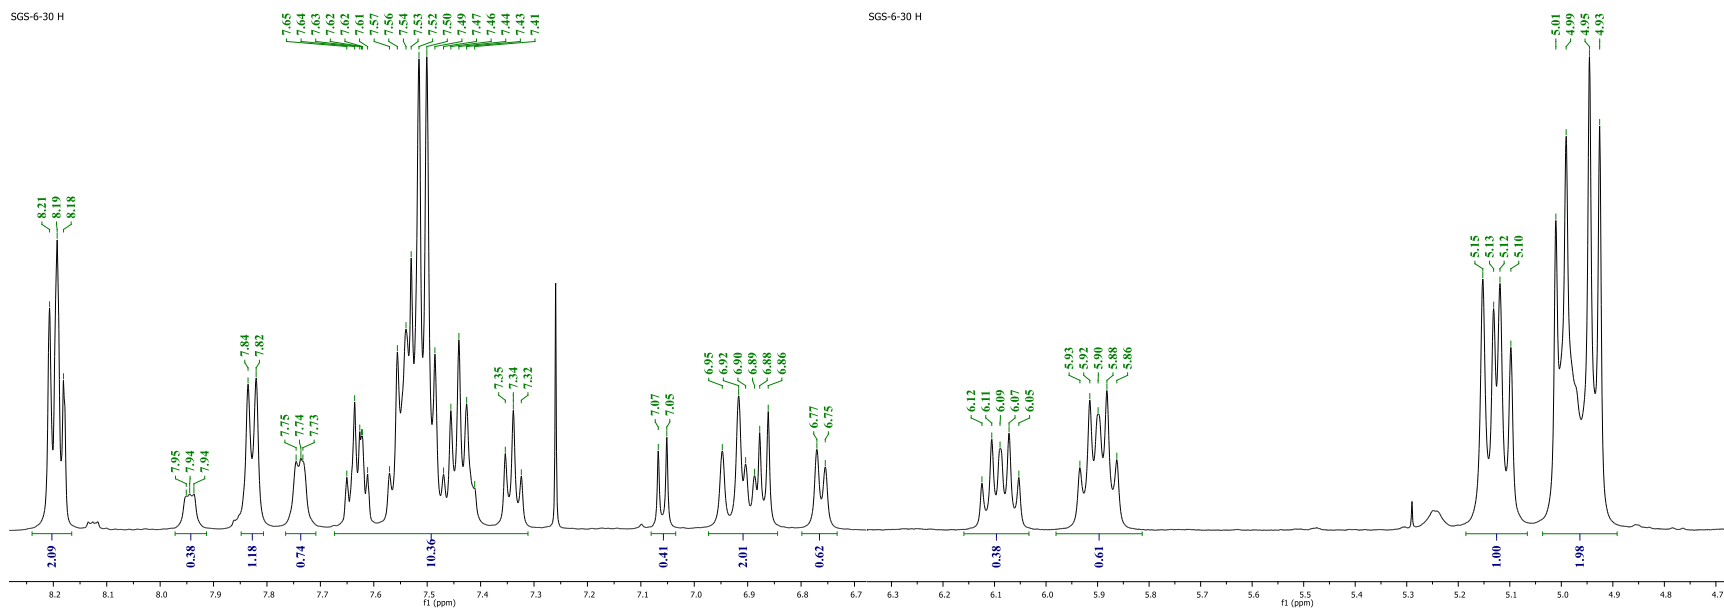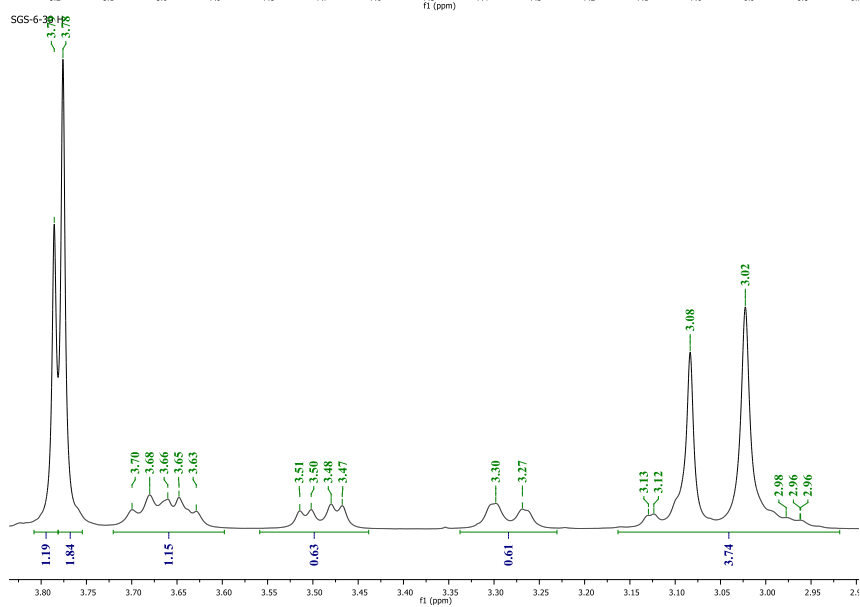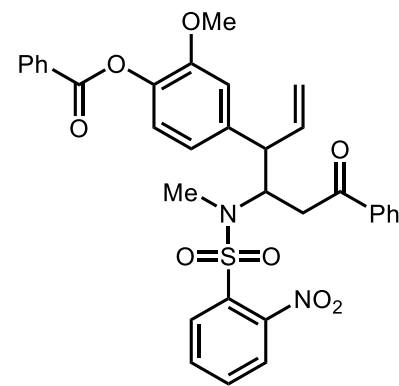

**9af**  
 $^1\text{H}$  NMR  
 500 MHz,  $\text{CDCl}_3$

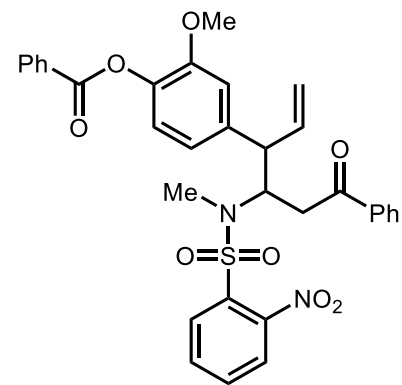

**9af**  
<sup>13</sup>C NMR  
 126 MHz, CDCl<sub>3</sub>

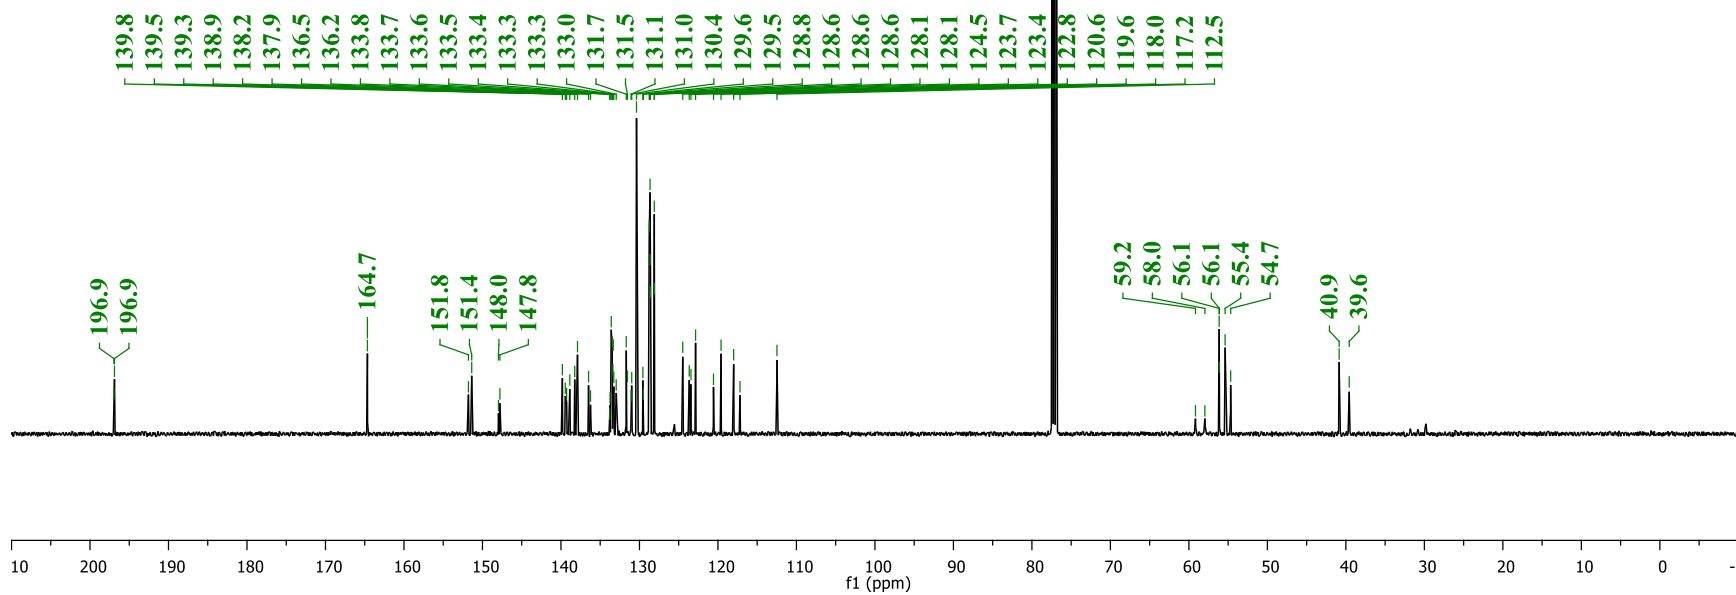



SGS-6-19 H

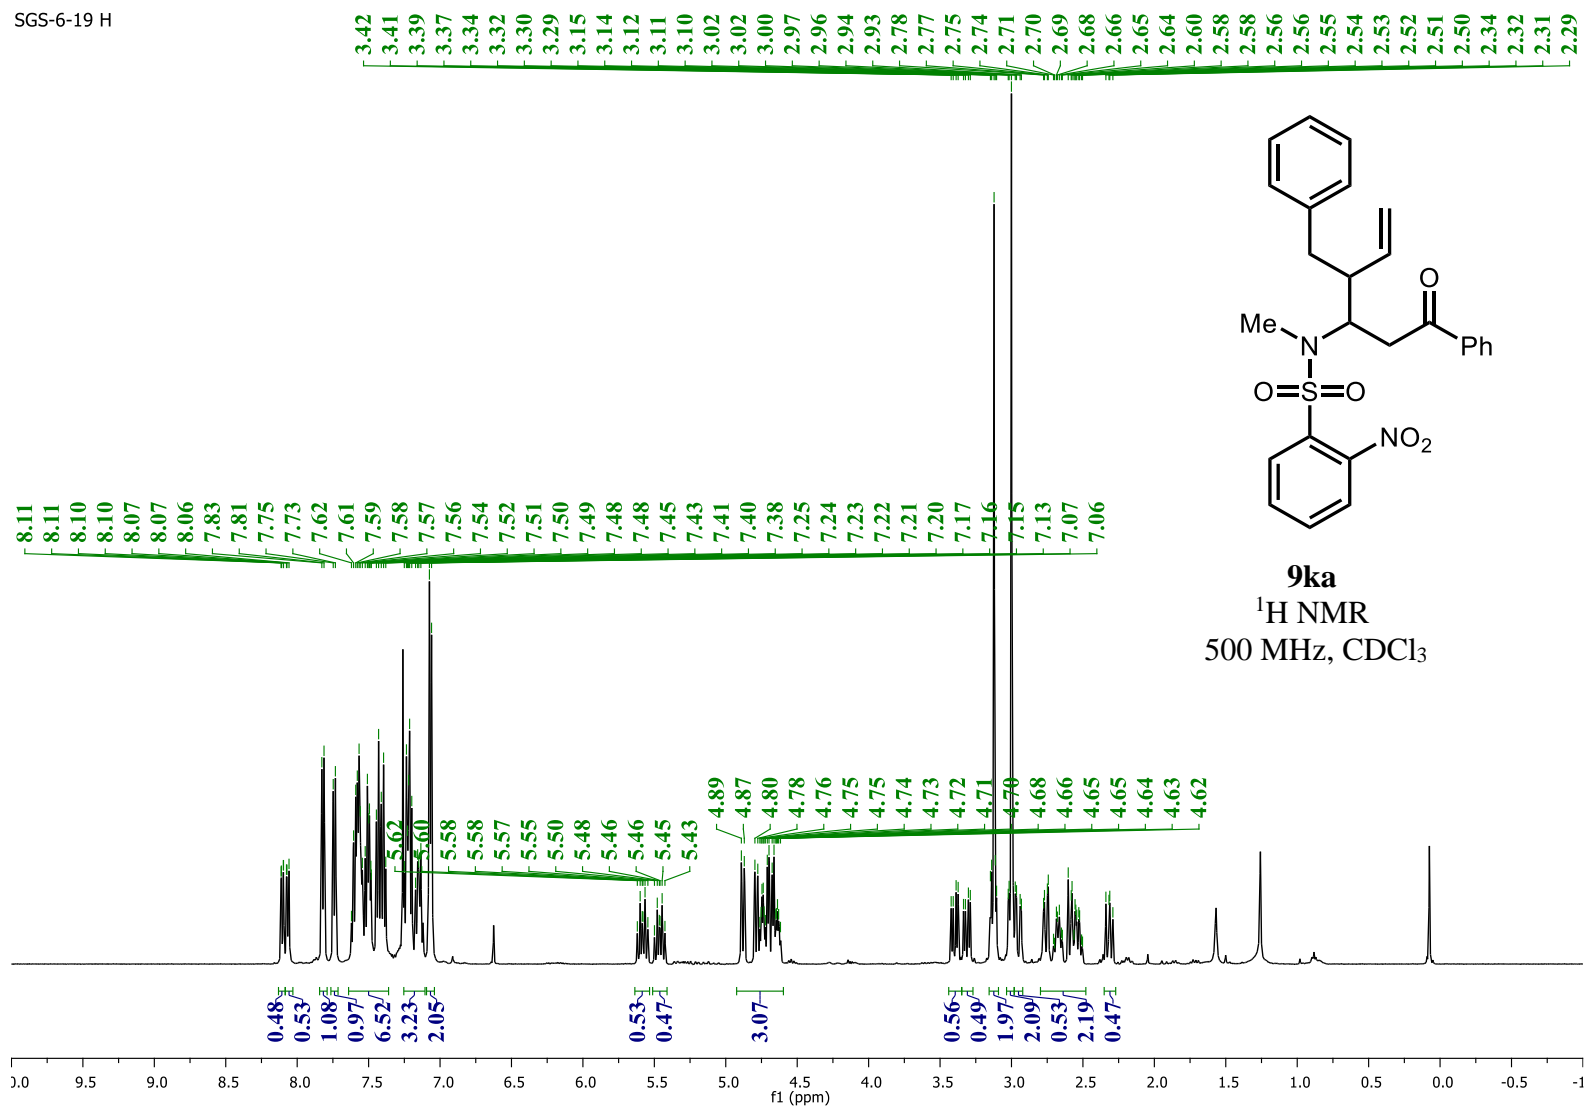

SGS-6-19 C

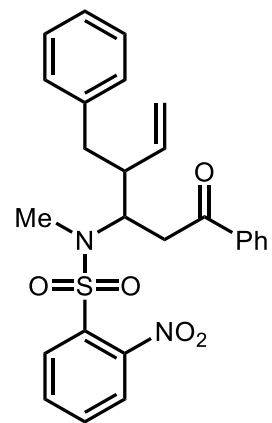

**9ka**  
<sup>13</sup>C NMR  
126 MHz, CDCl<sub>3</sub>

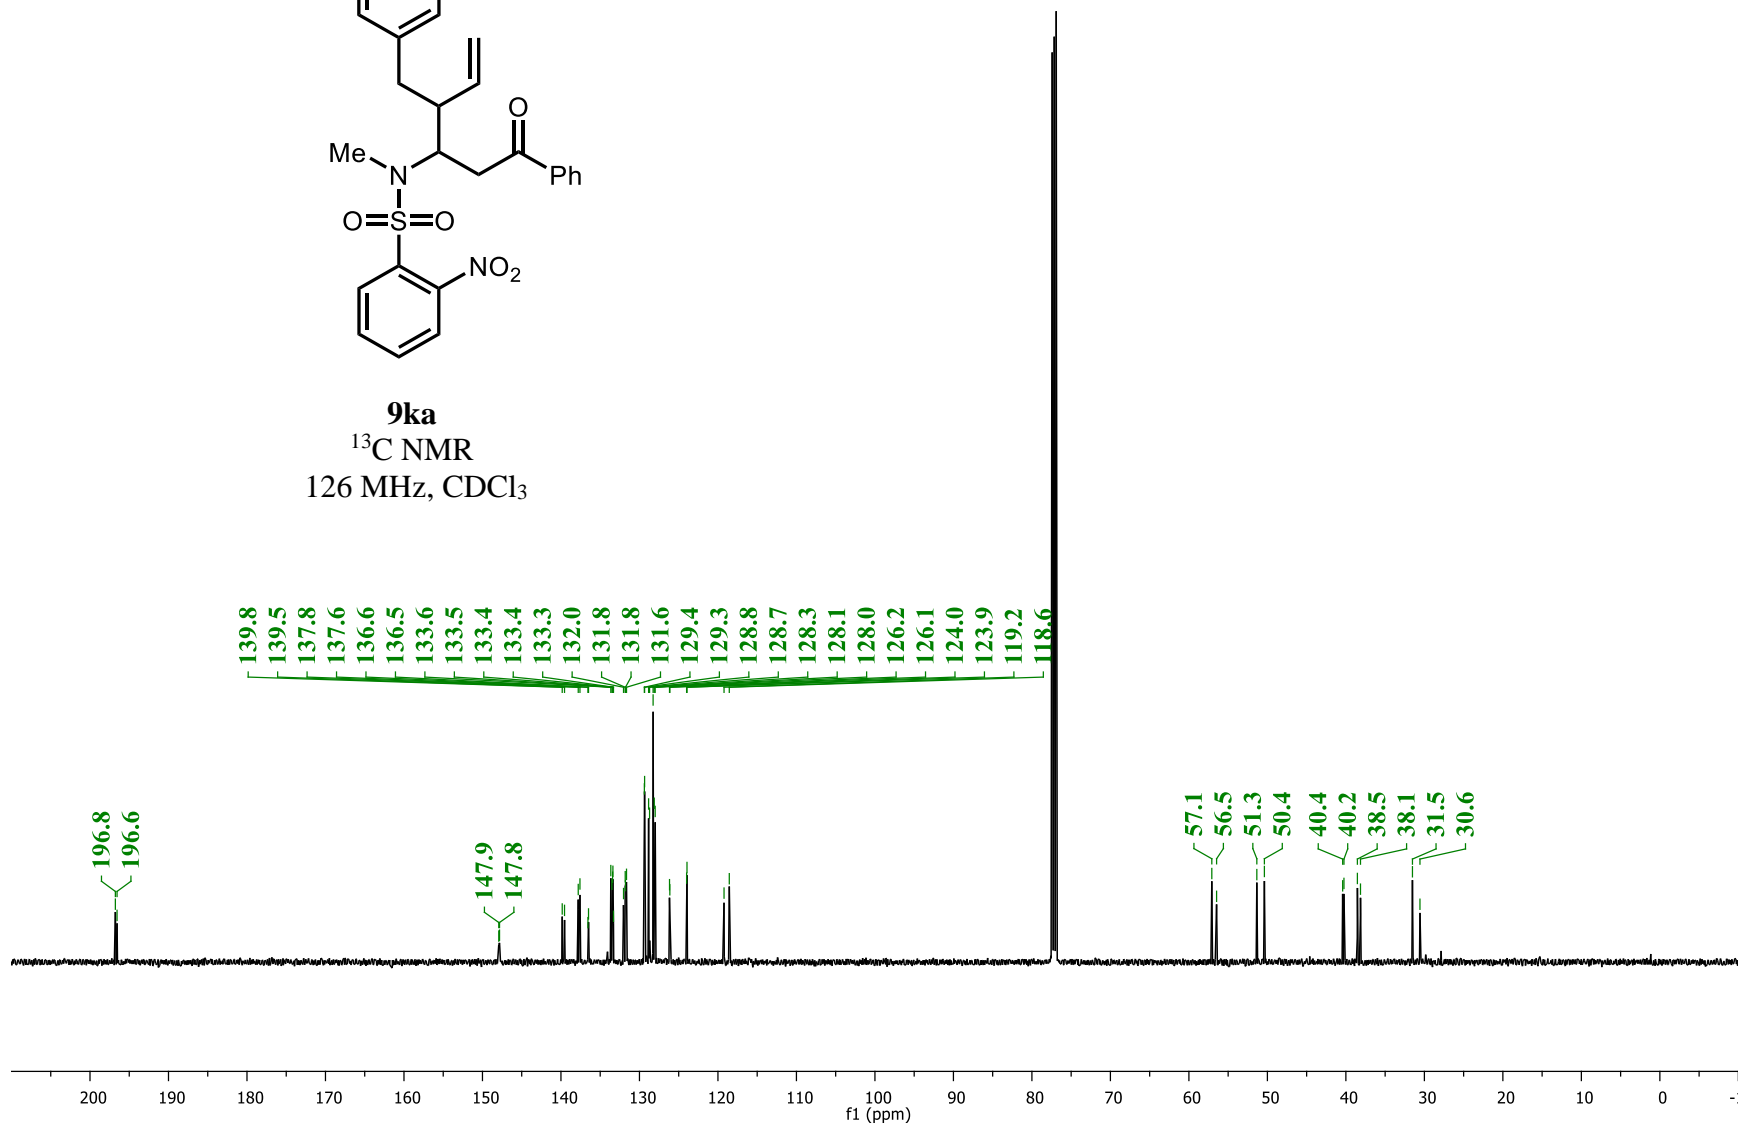

S174

SGS-5-168-8 H

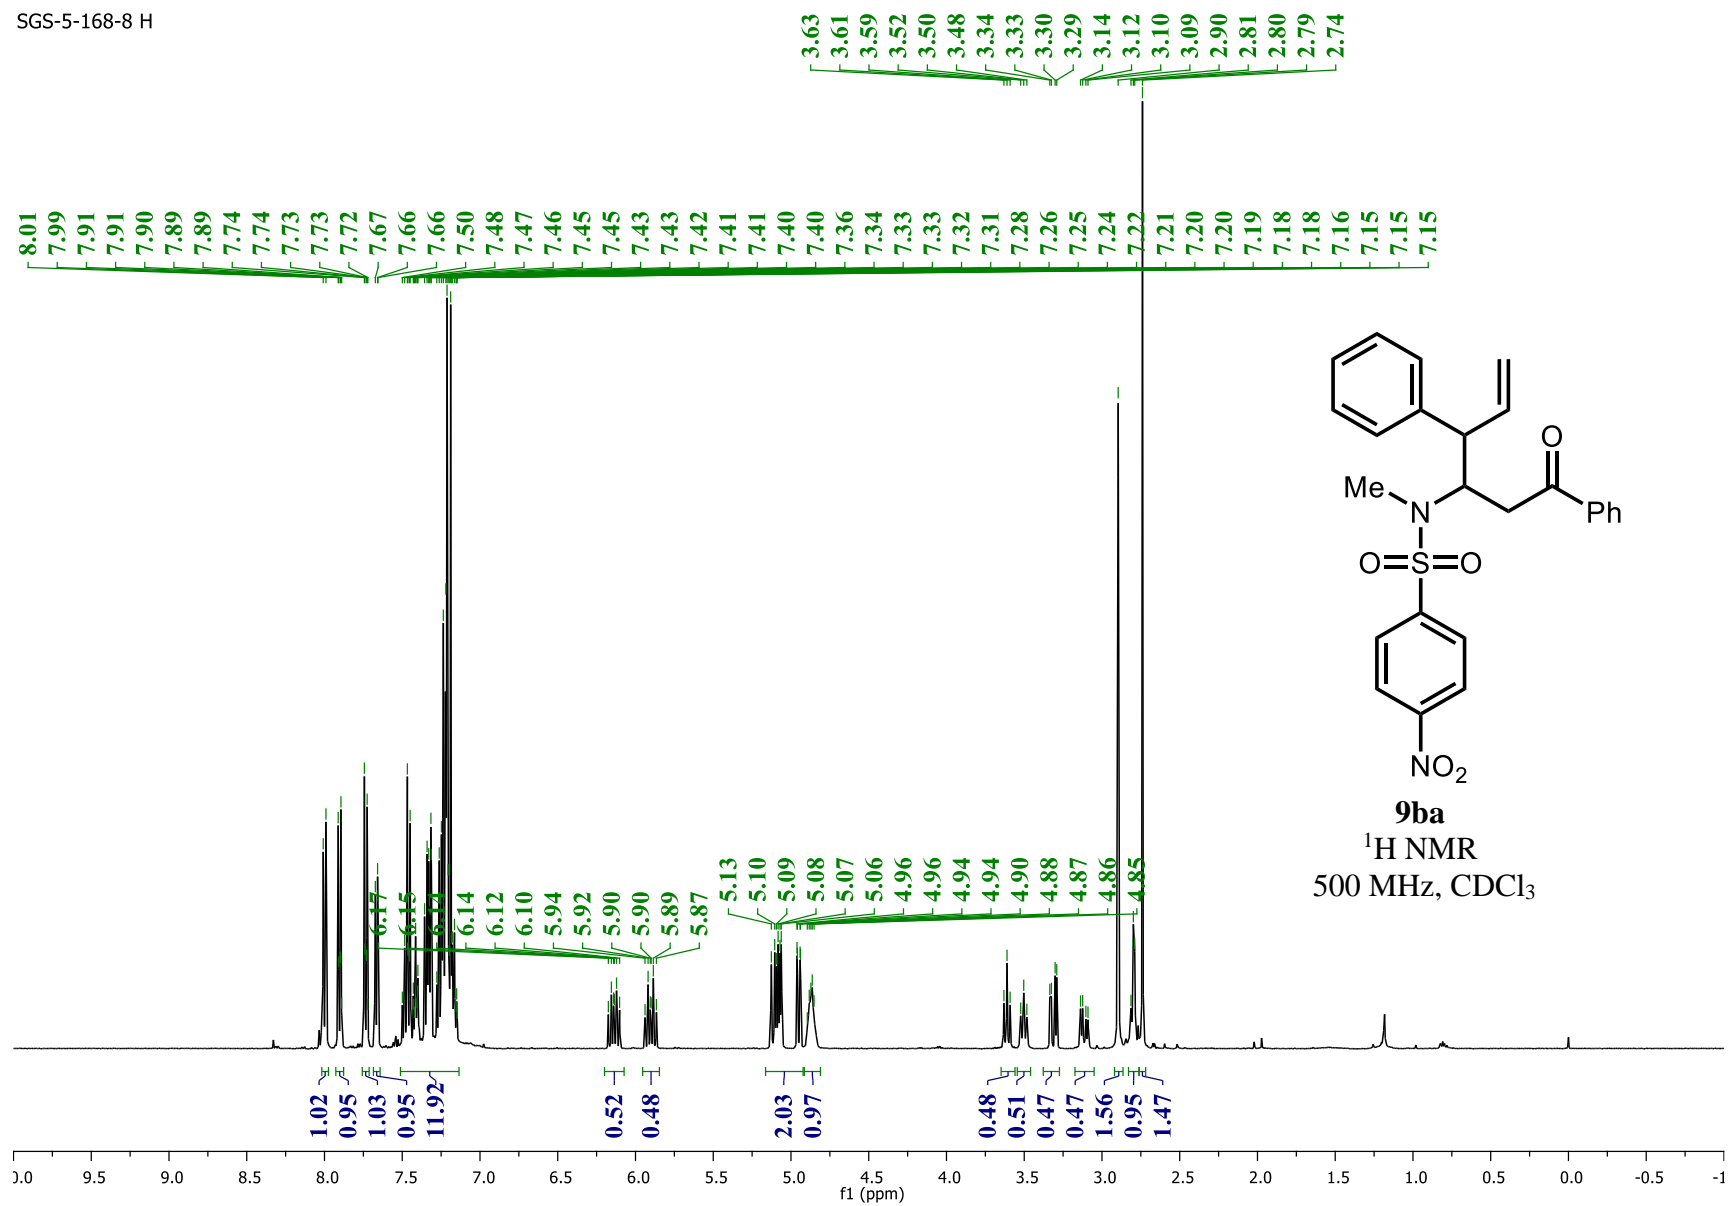

S175

SGS-5-168-8 C

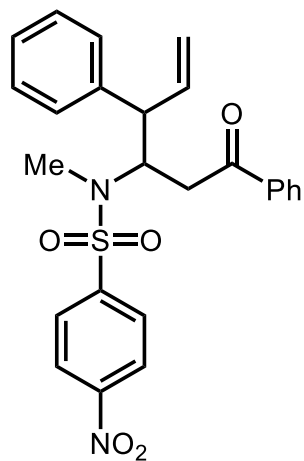

**9ba**  
<sup>13</sup>C NMR  
126 MHz, CDCl<sub>3</sub>

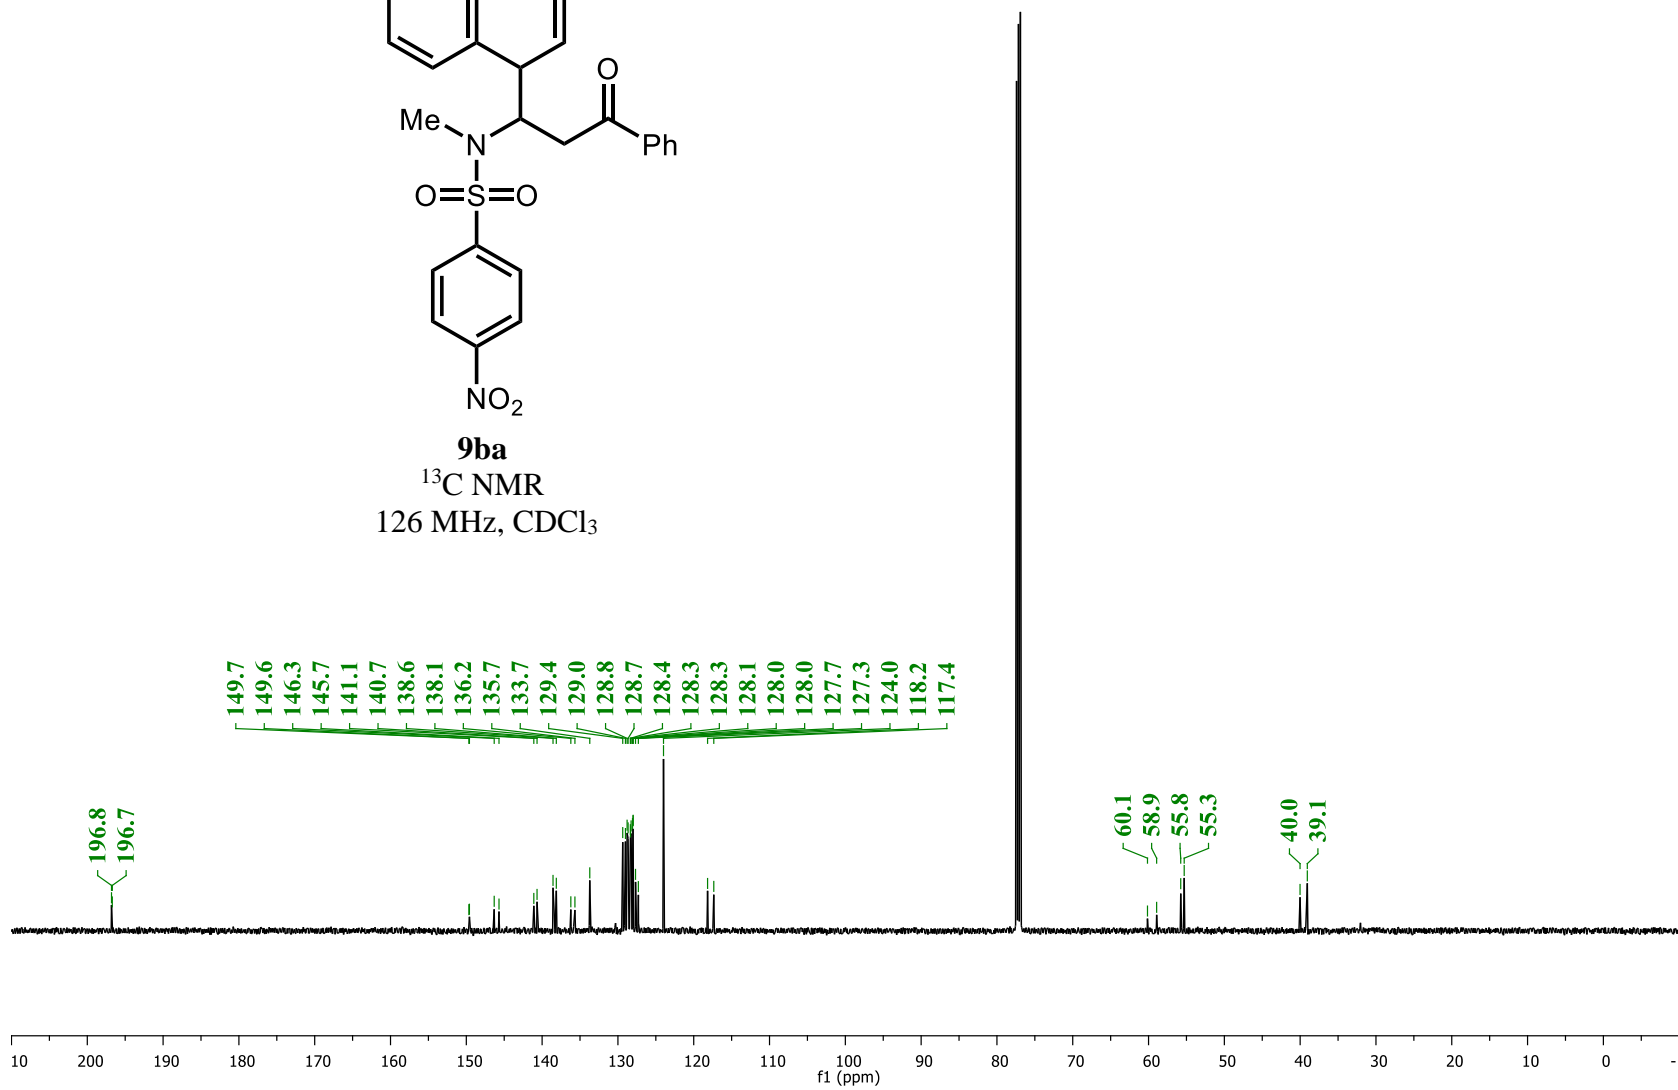

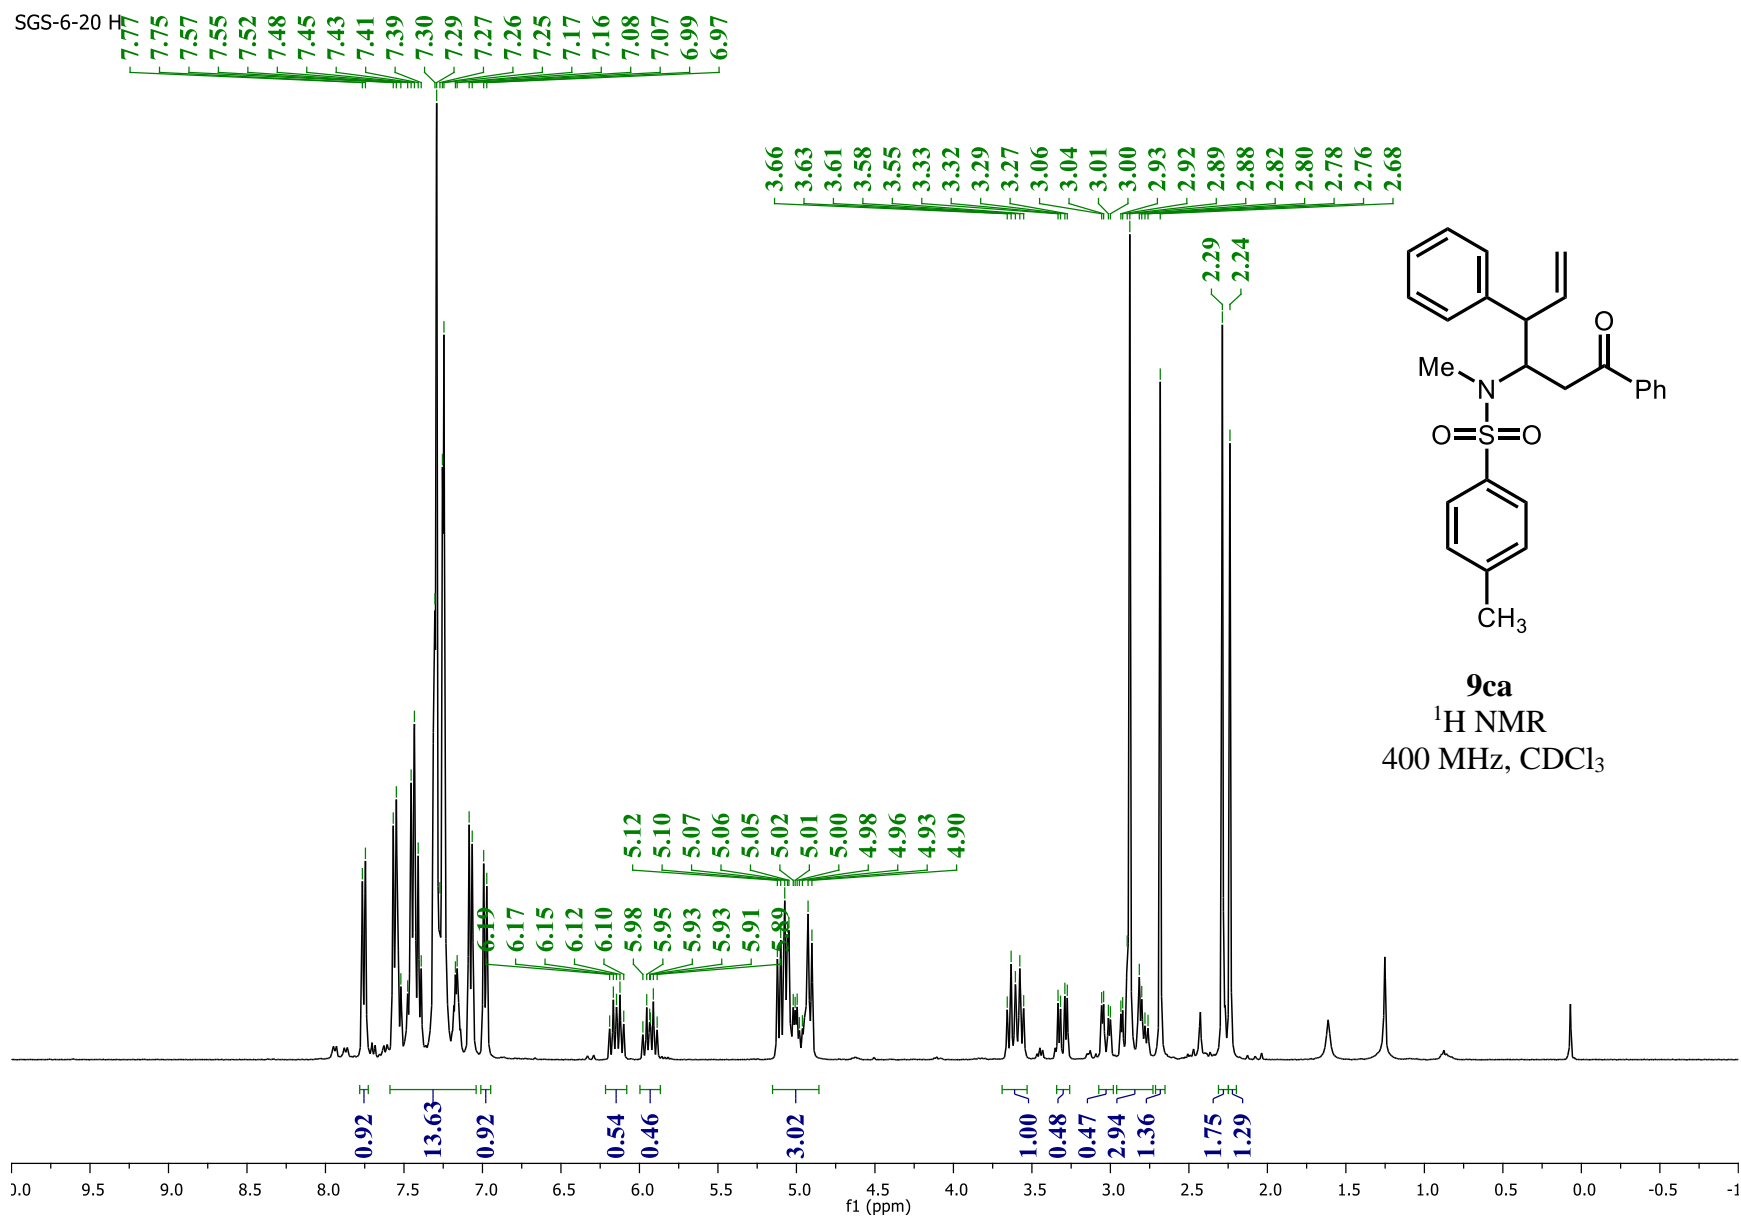

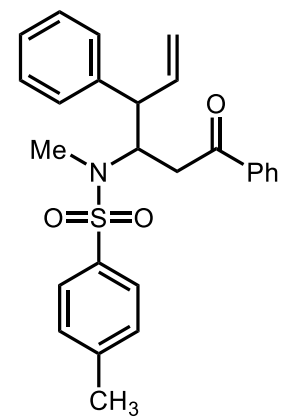

**9ca**  
<sup>13</sup>C NMR  
101 MHz, CDCl<sub>3</sub>

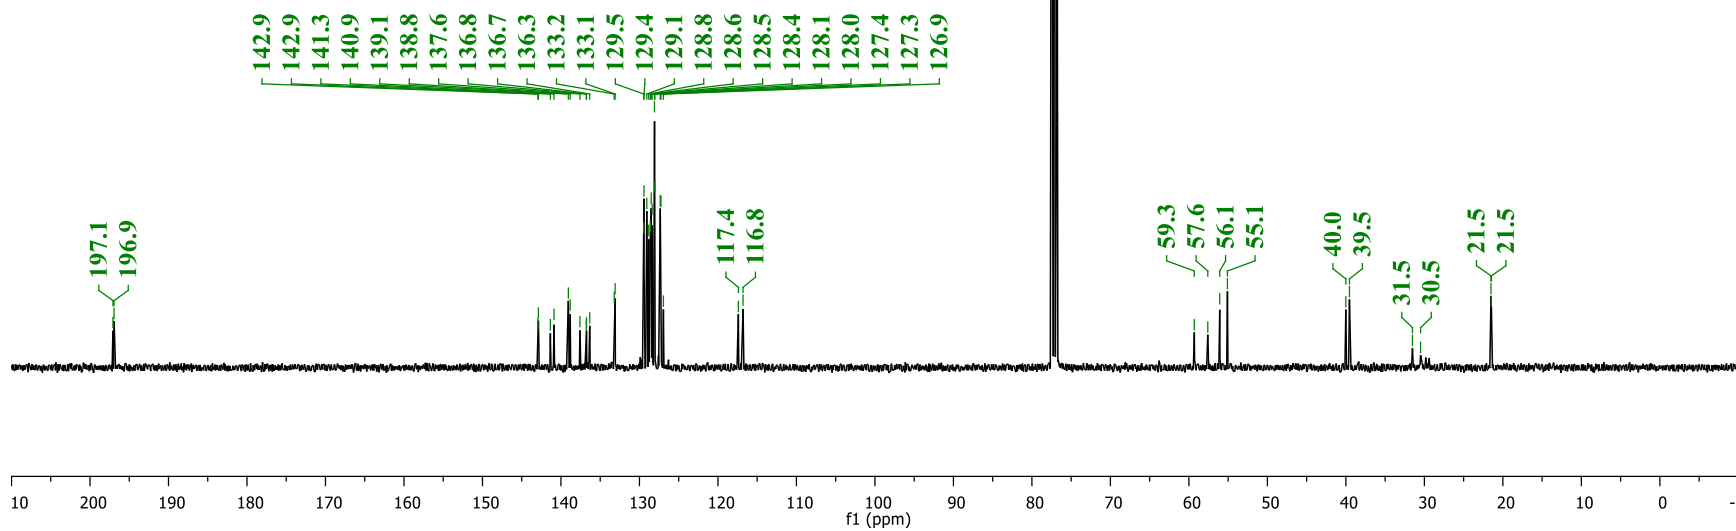

SGS-6-63 H

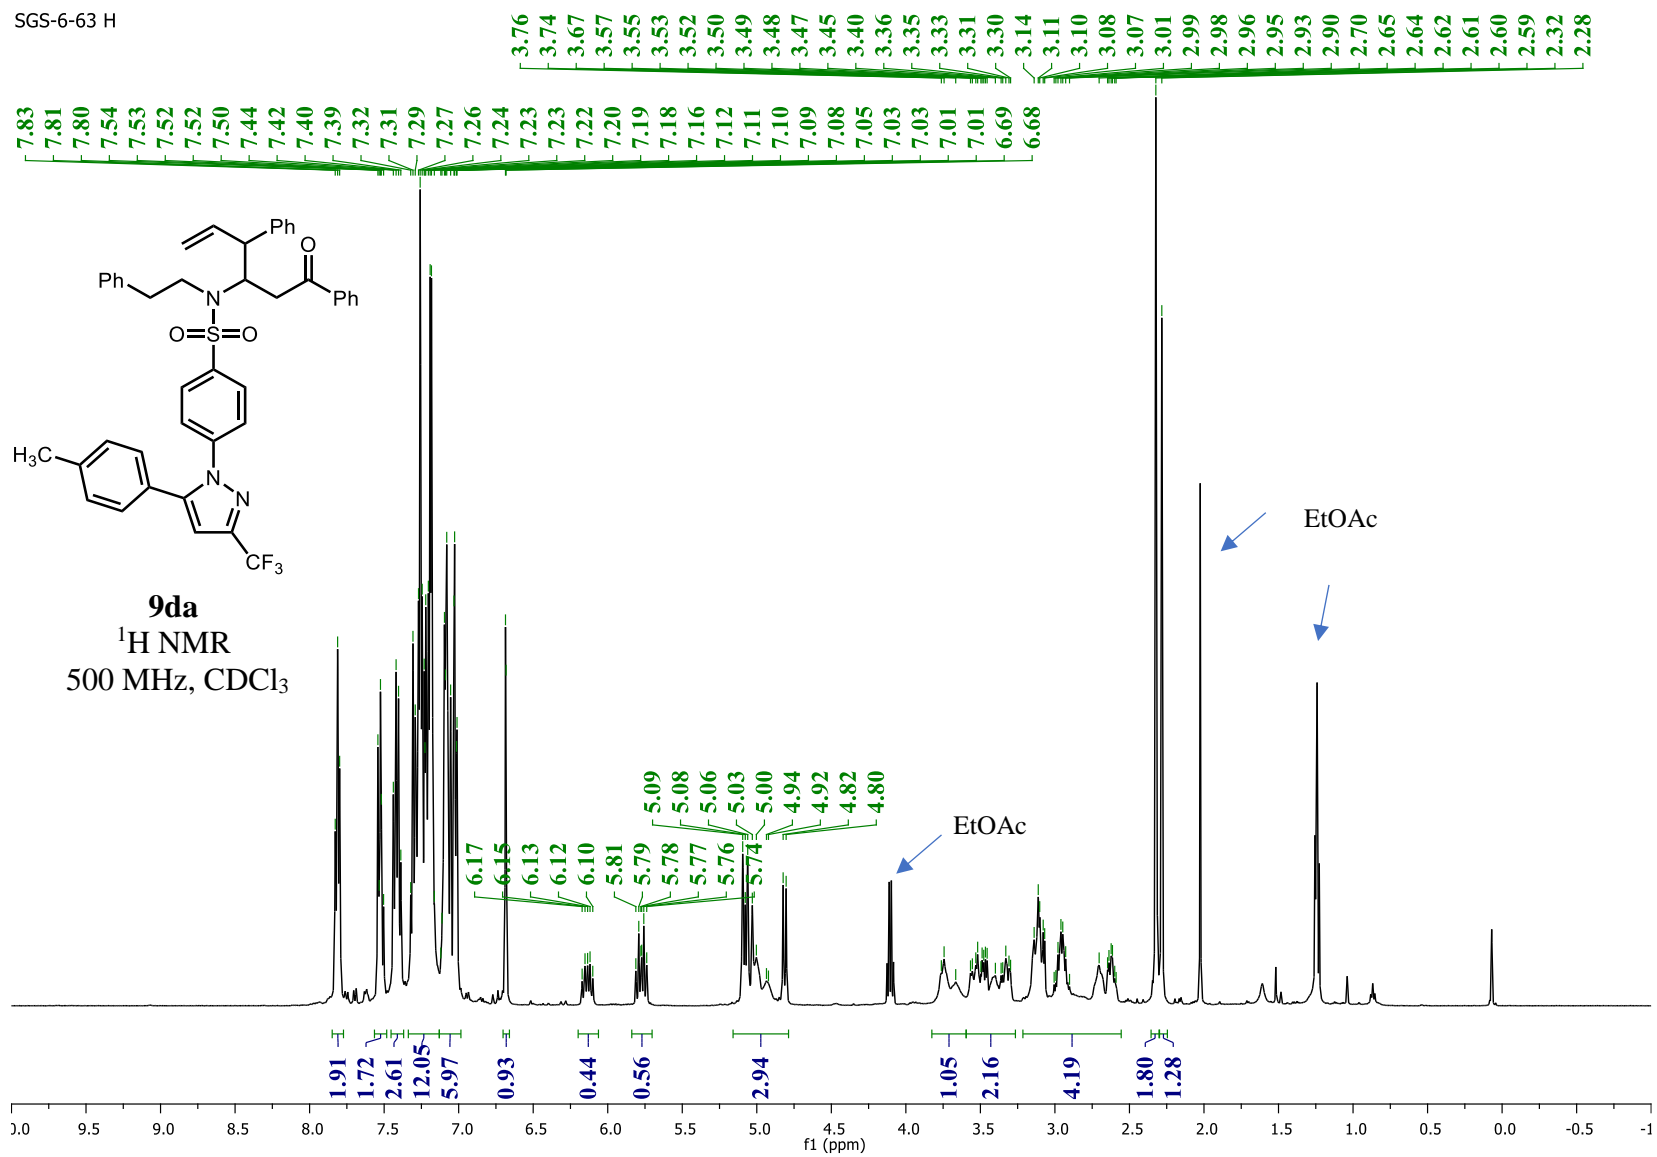

SG5-6-63 H

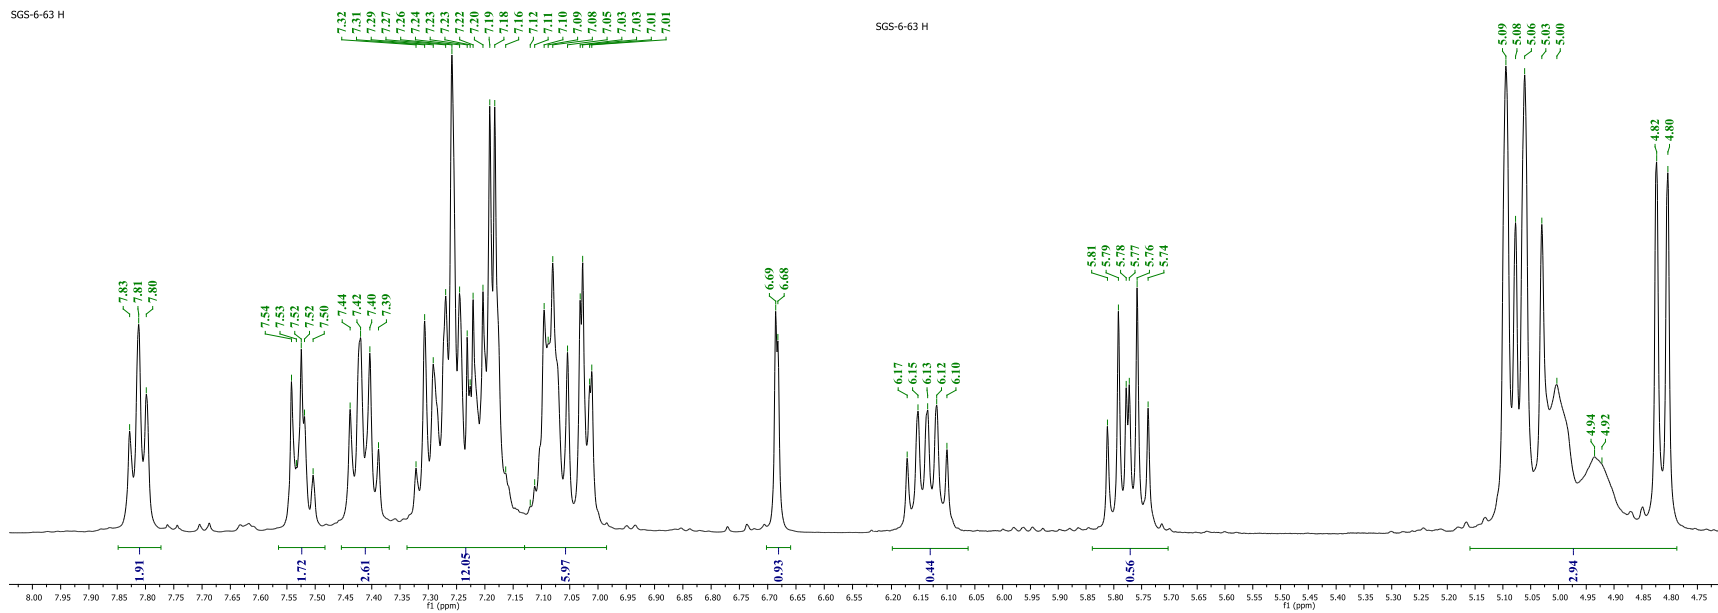

SG5-6-63 H

SG5-6-63 H

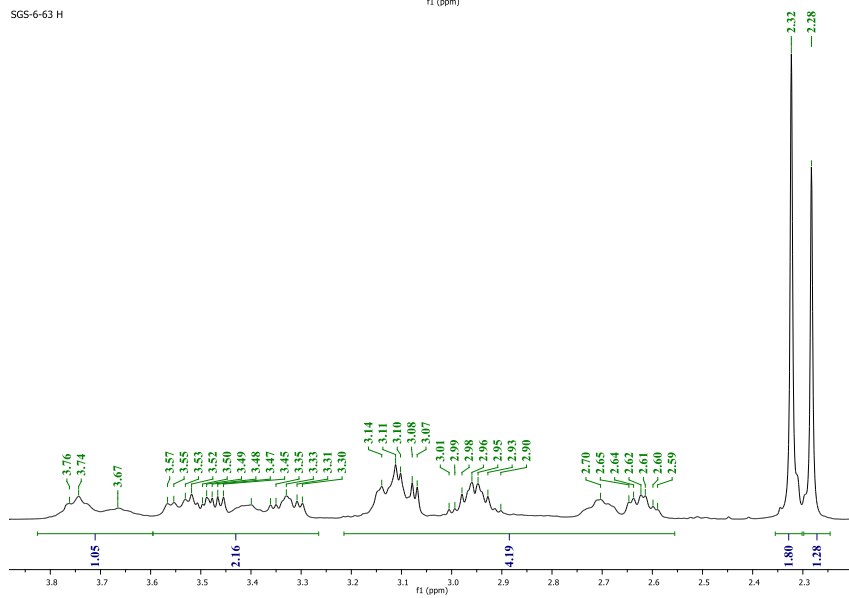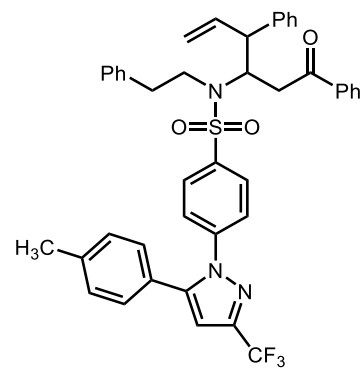

**9da**  
<sup>1</sup>H NMR  
 500 MHz, CDCl<sub>3</sub>



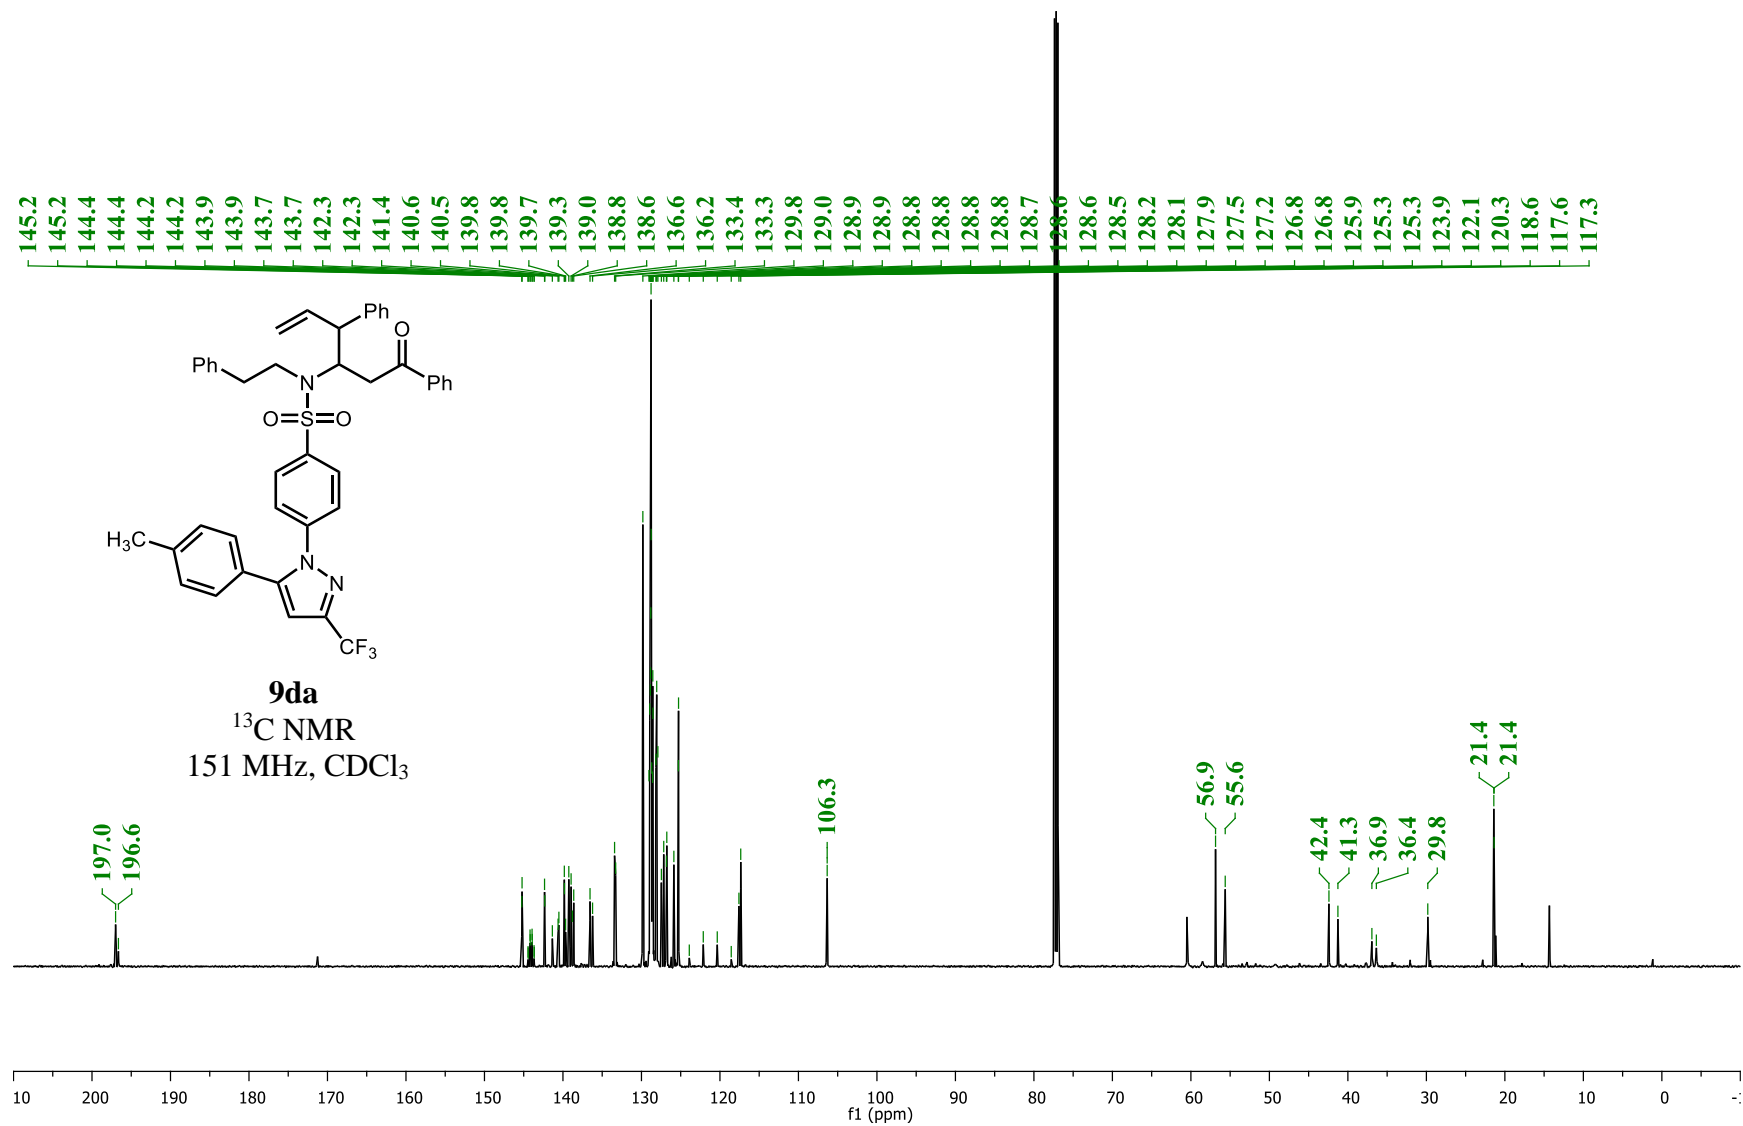

SGS-6-63 F

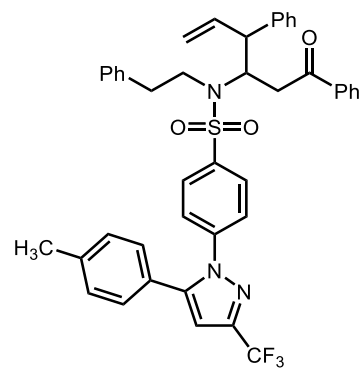

**9da**

<sup>19</sup>F NMR  
471 MHz, CDCl<sub>3</sub>

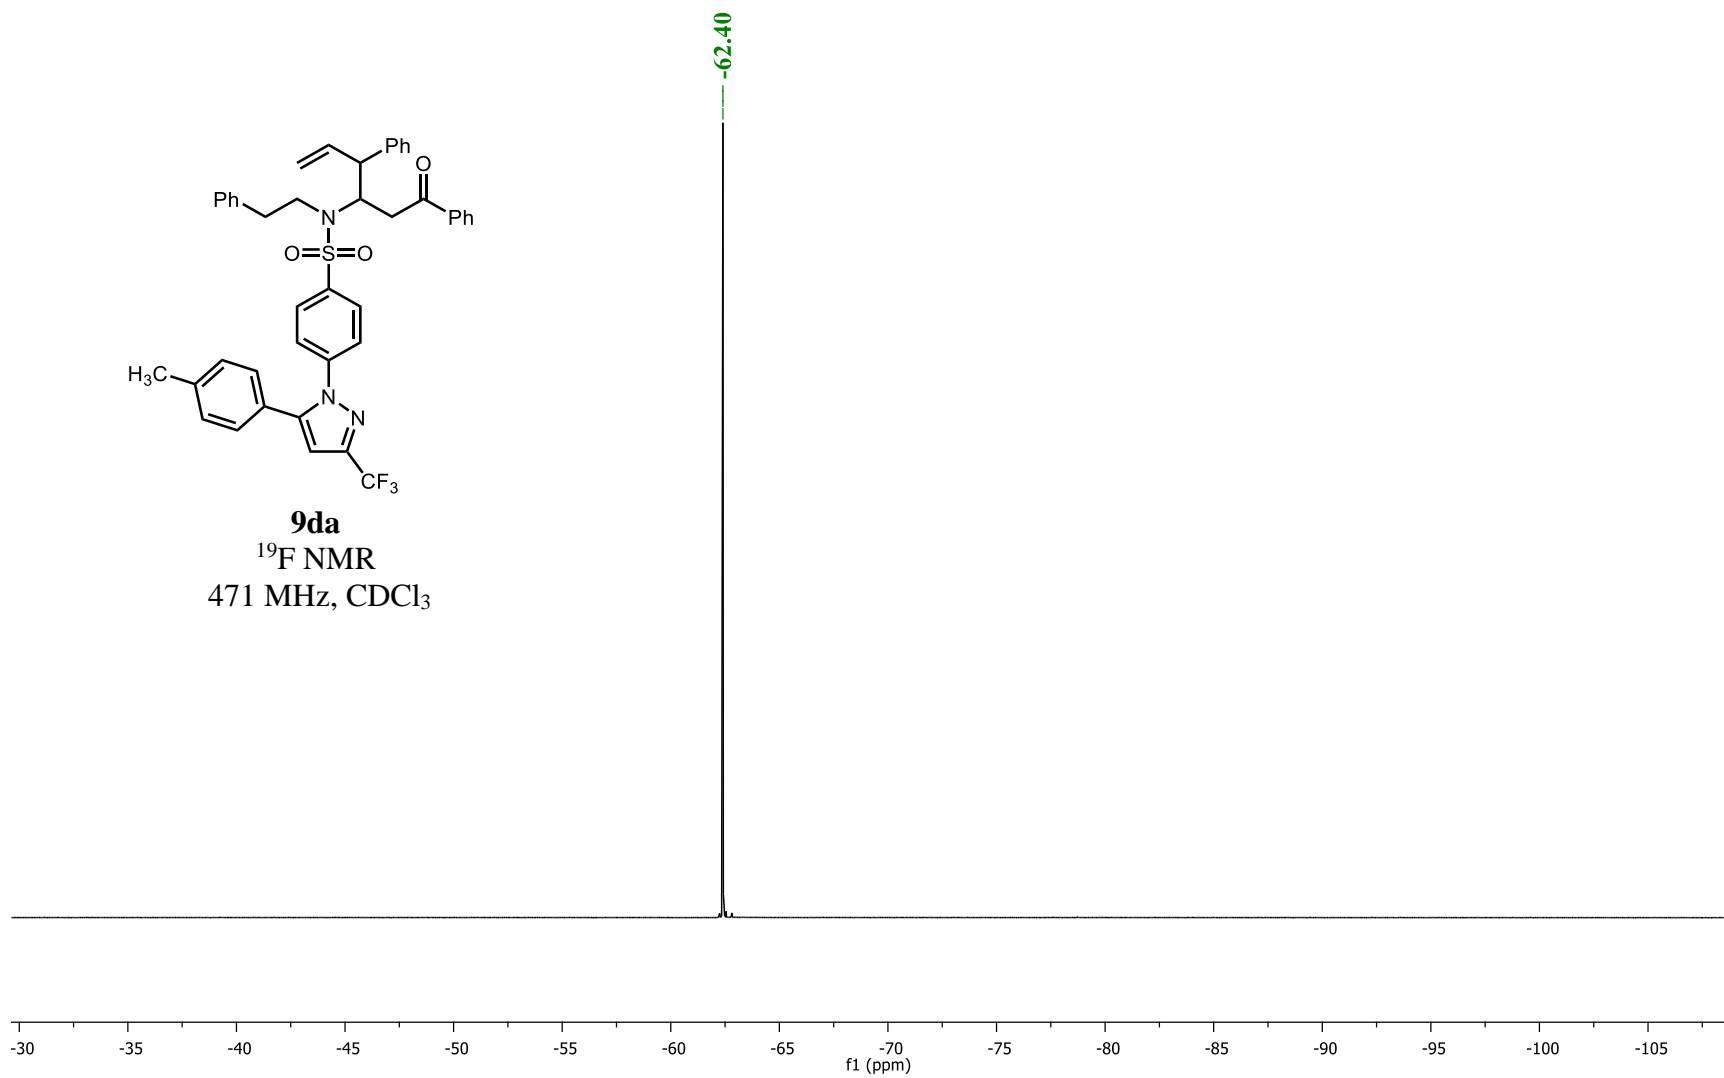

S182

## 7.5 NMR spectra of starting materials

SGS-5-191 H

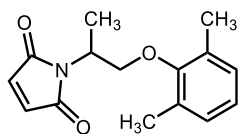

**2g**  
 $^1\text{H}$  NMR  
500 MHz,  $\text{CDCl}_3$

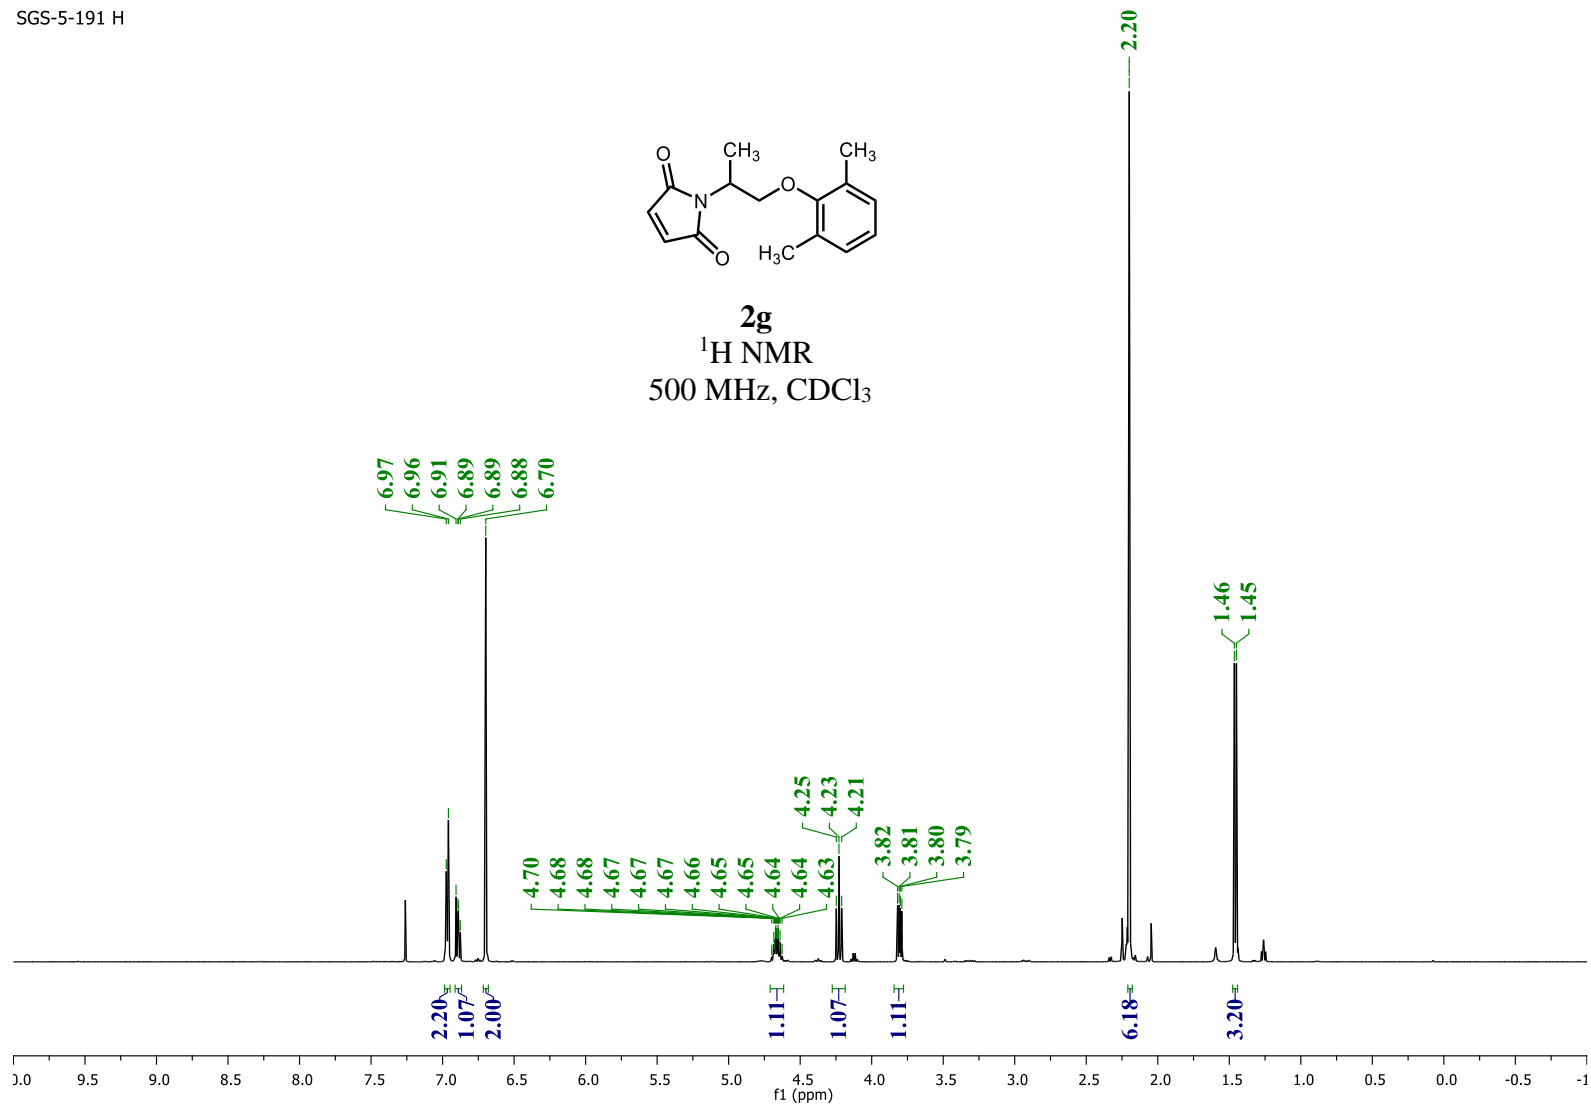

SGS-5-191 C

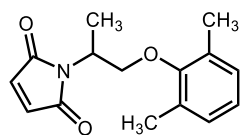

**2g**  
<sup>13</sup>C NMR  
126 MHz, CDCl<sub>3</sub>

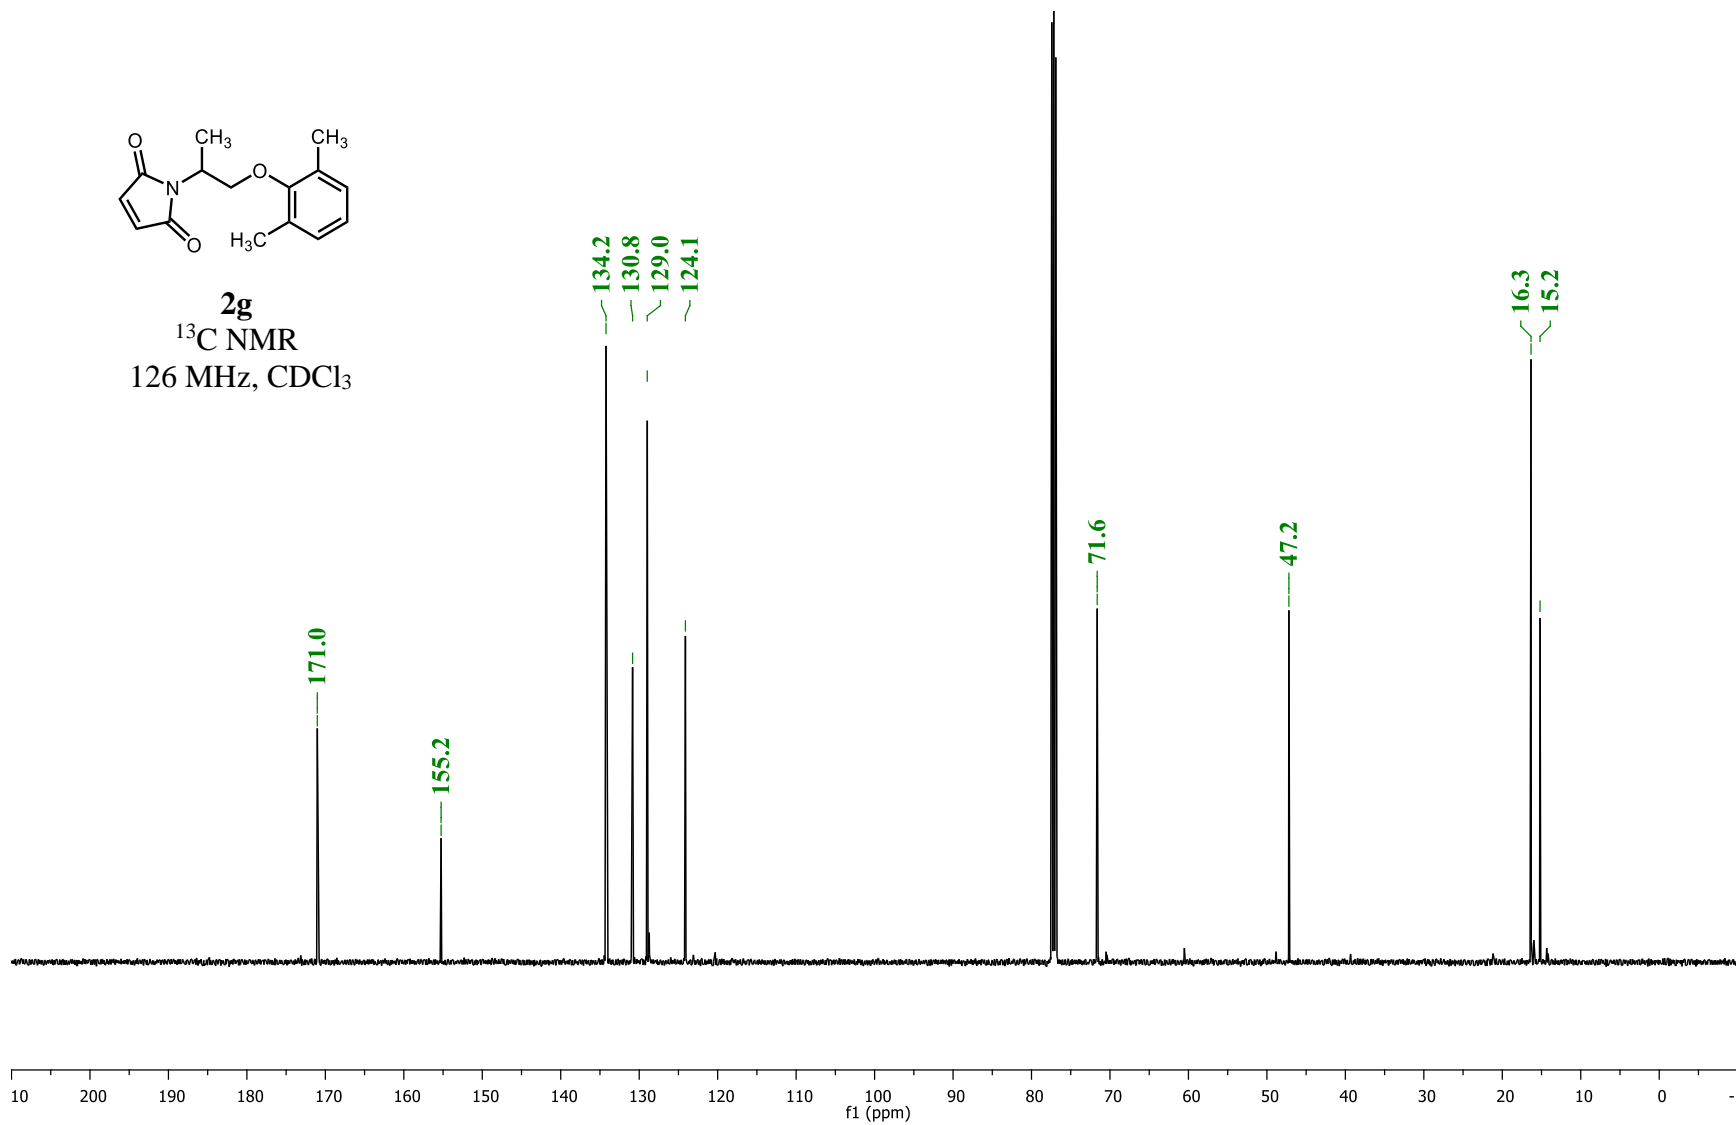

SGS-5-181 H

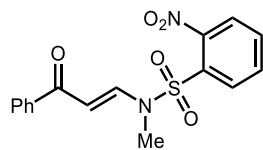

**8a**  
 $^1\text{H NMR}$   
500 MHz,  $\text{CDCl}_3$

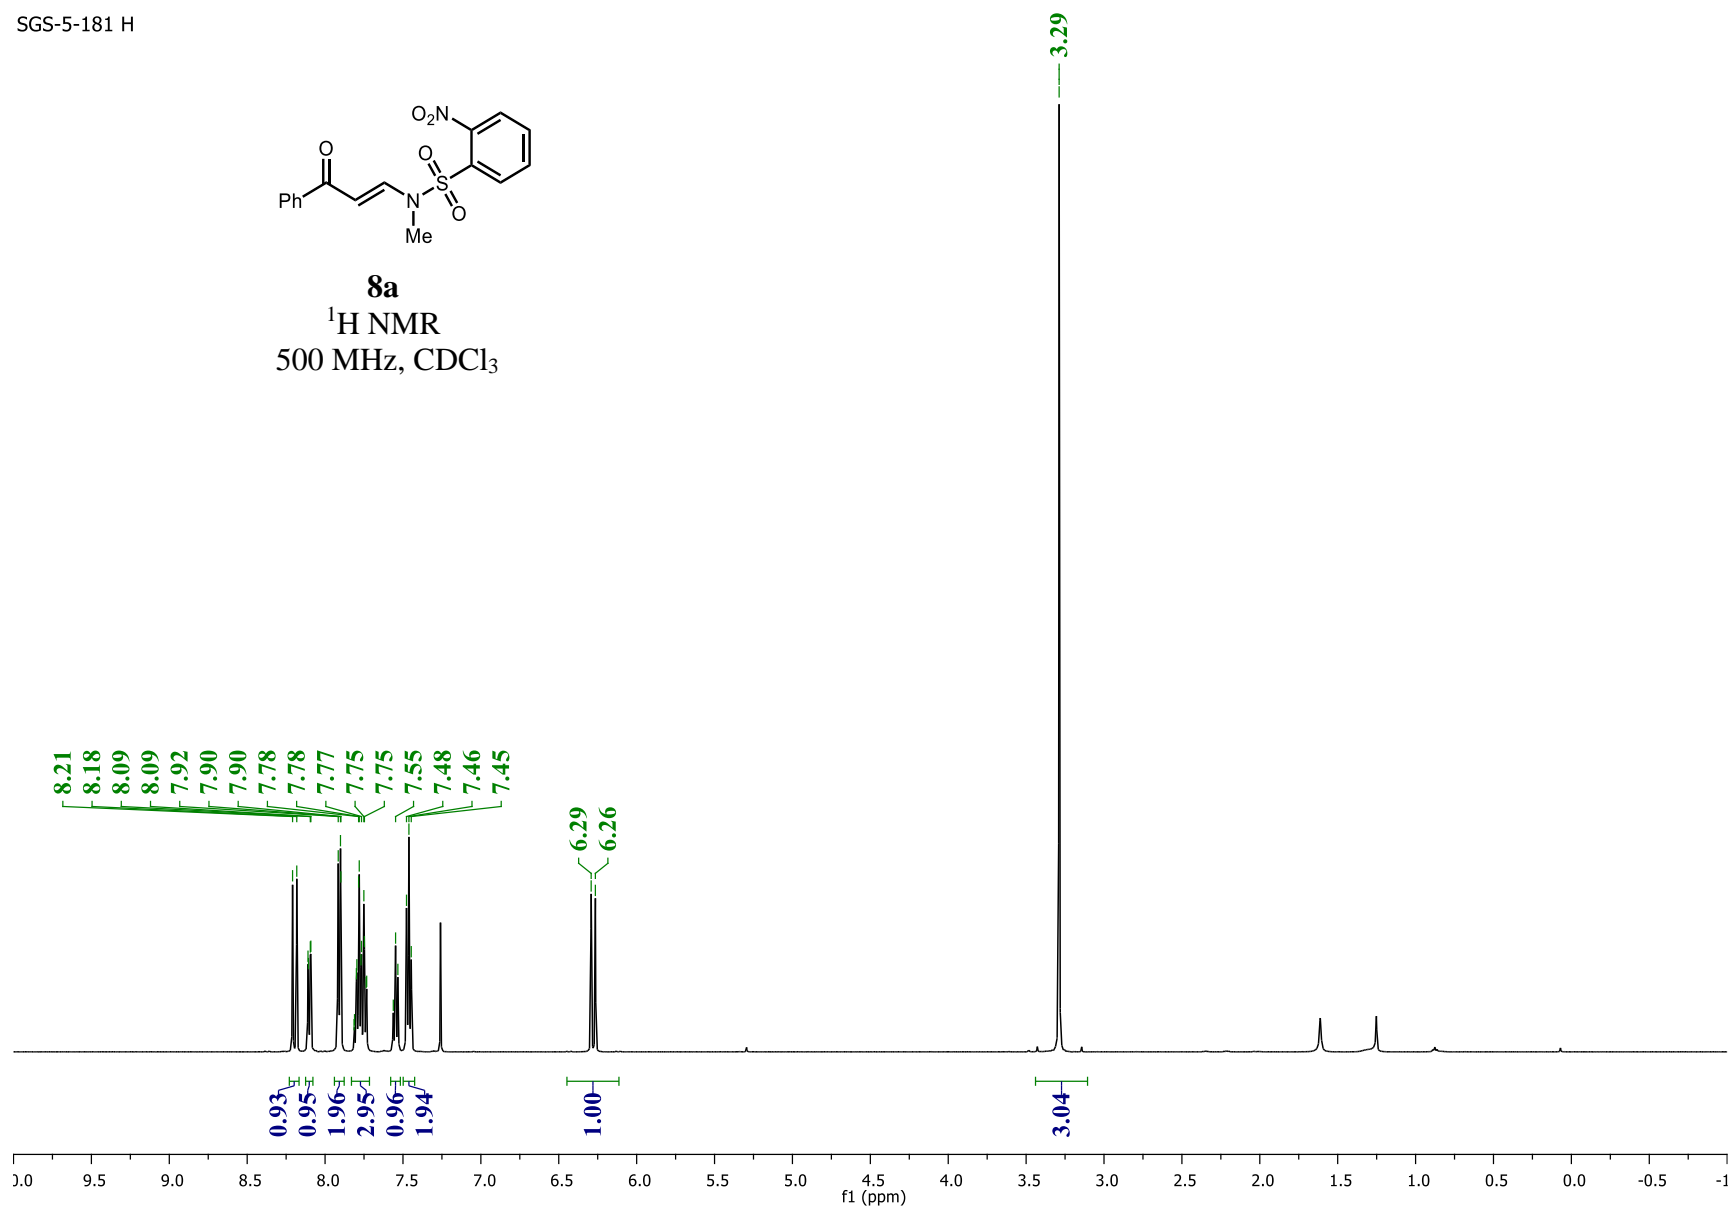

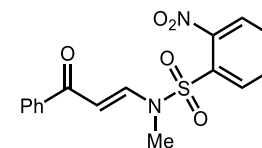

**8a**  
<sup>13</sup>C NMR  
126 MHz, CDCl<sub>3</sub>

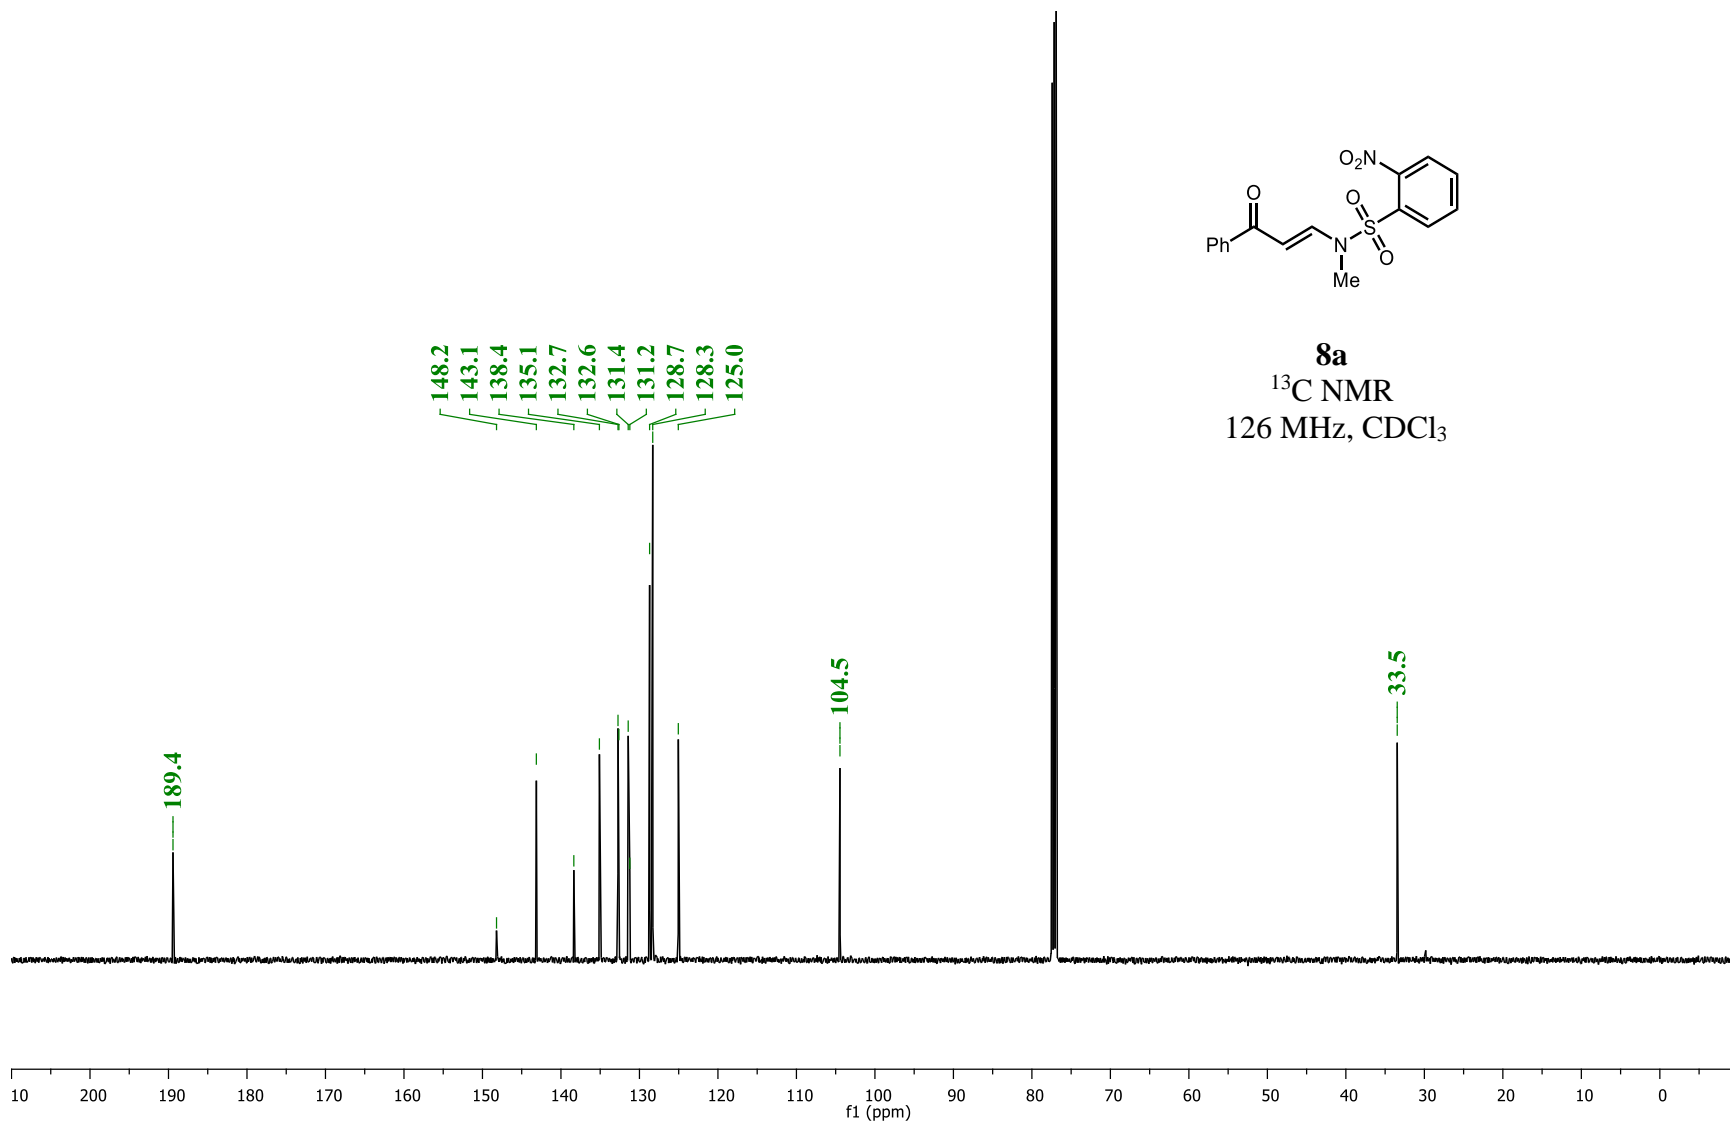

SGS-5-183 H

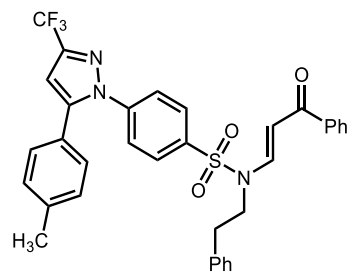

**8d**  
<sup>1</sup>H NMR  
500 MHz, CDCl<sub>3</sub>

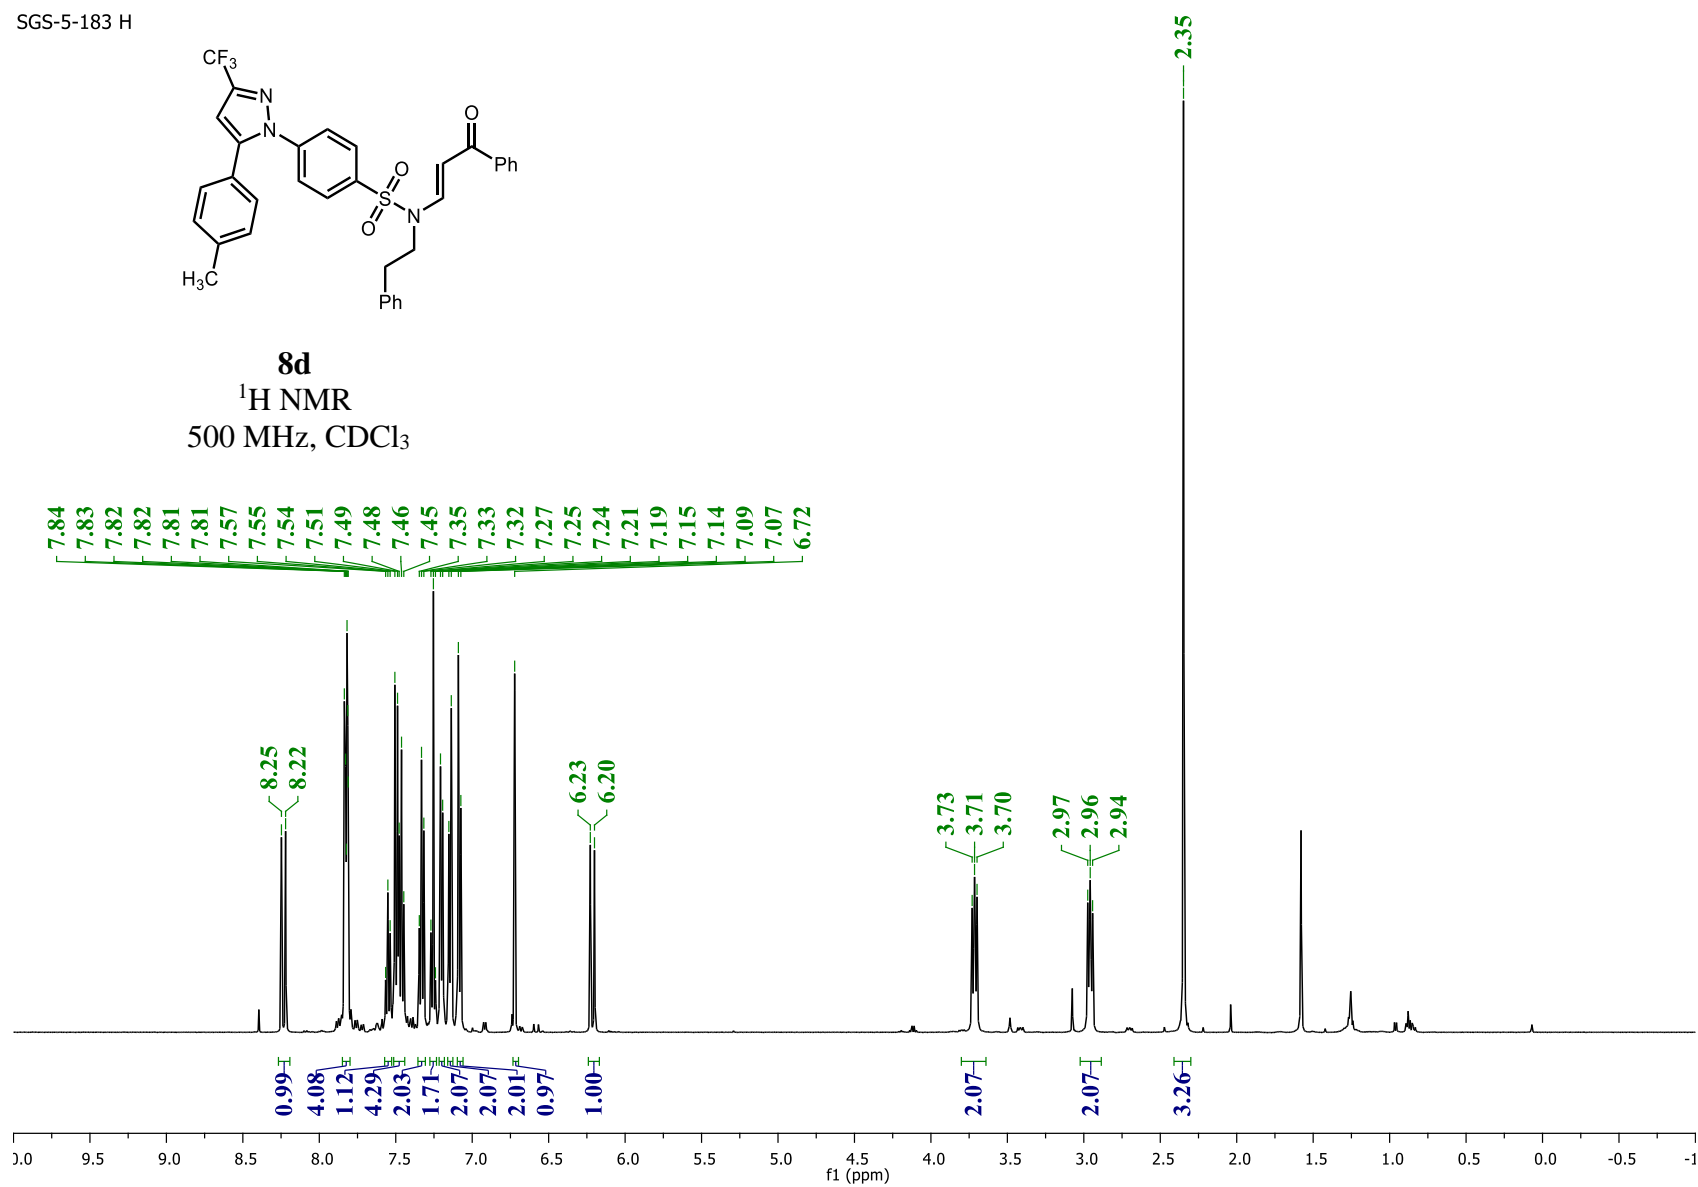

SGS-5-183 F

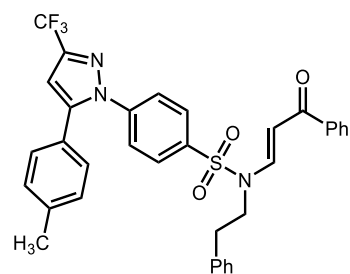

**8d**  
<sup>19</sup>F NMR  
471 MHz, CDCl<sub>3</sub>

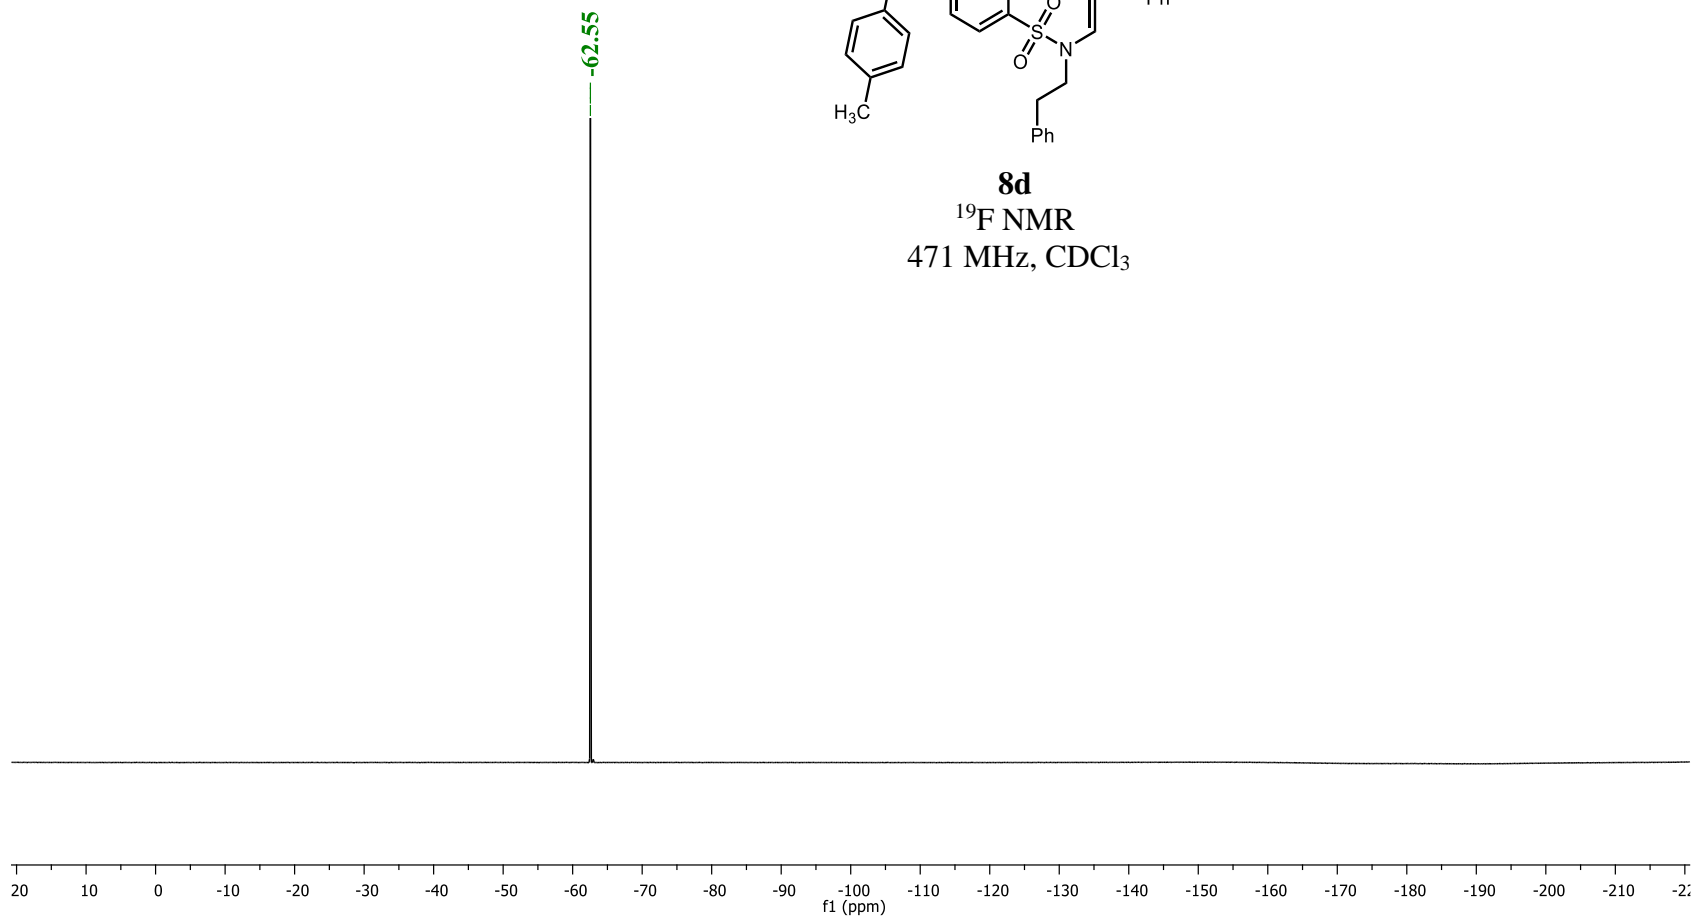



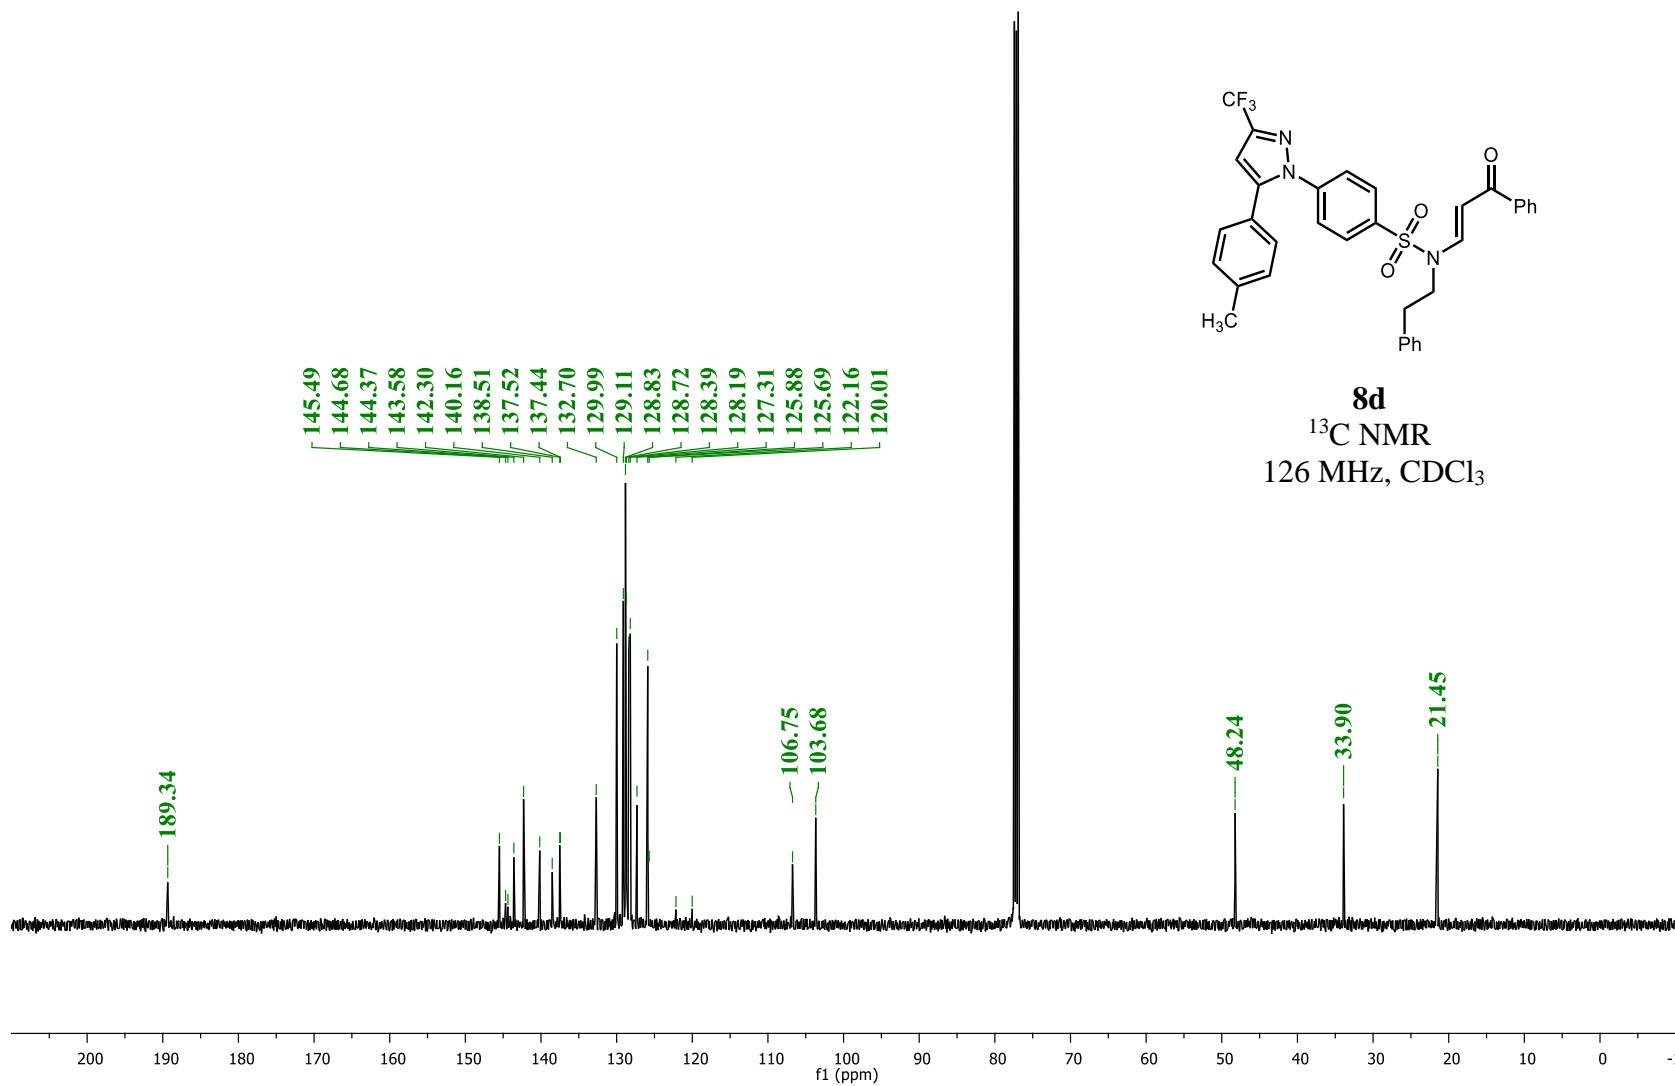

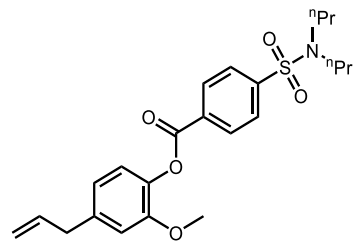

**5ah**  
 $^1\text{H NMR}$   
400 MHz,  $\text{CDCl}_3$

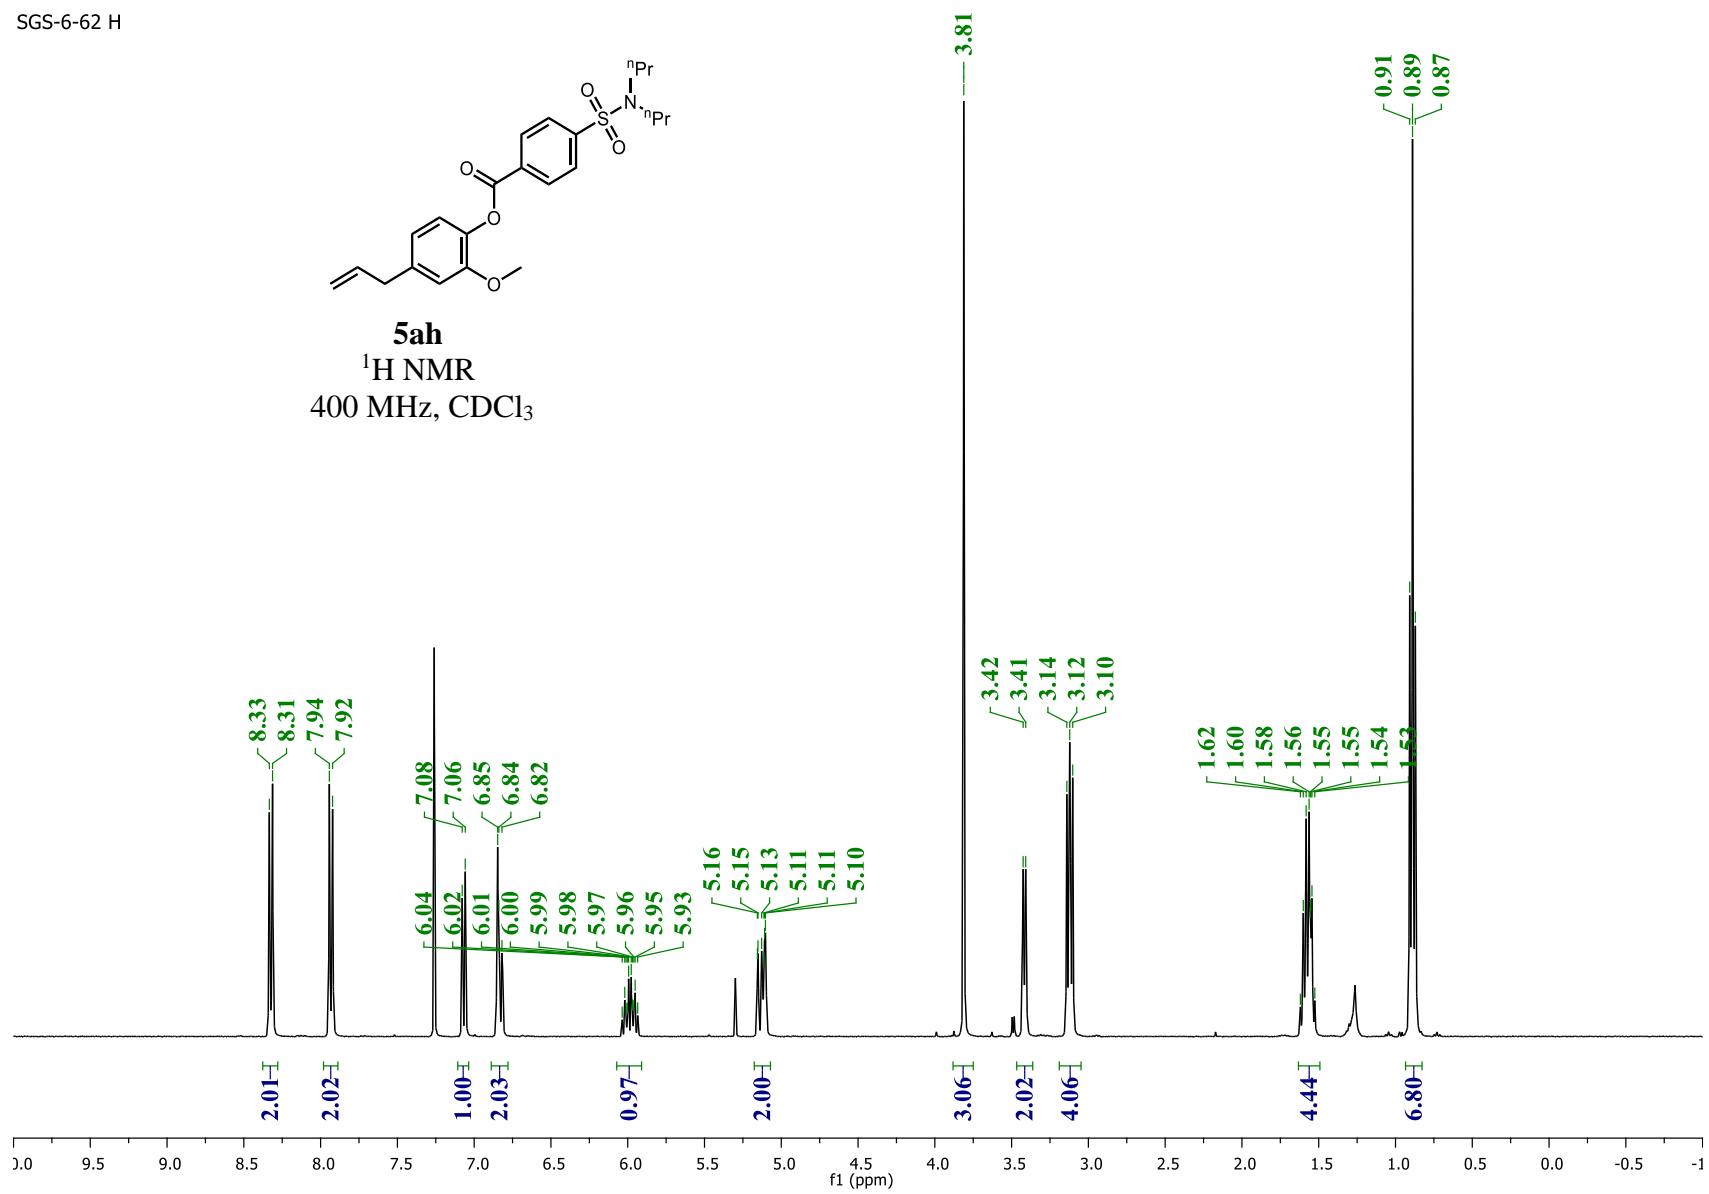

## 7.6 NMR spectra of synthetic application of products

SGS-6-94 H

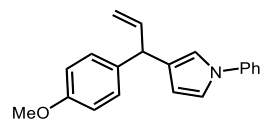

**10**  
<sup>1</sup>H NMR  
500 MHz, CDCl<sub>3</sub>

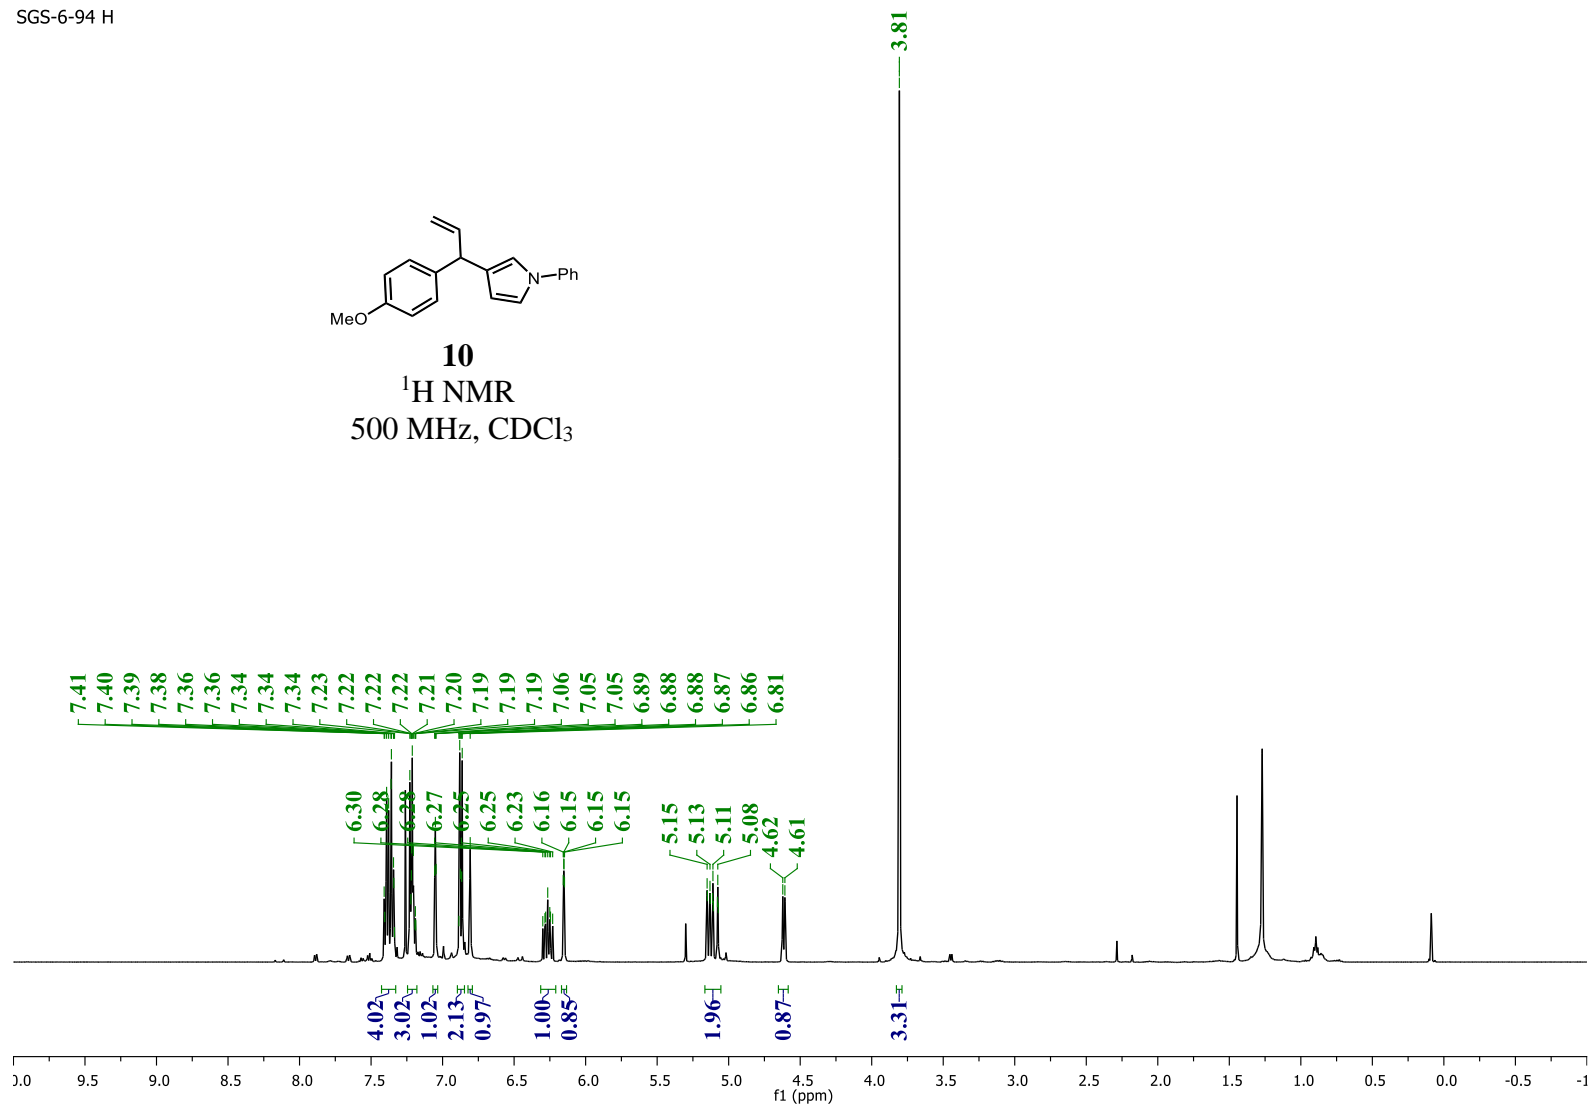

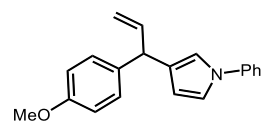

**10**  
<sup>13</sup>C NMR  
126 MHz, CDCl<sub>3</sub>

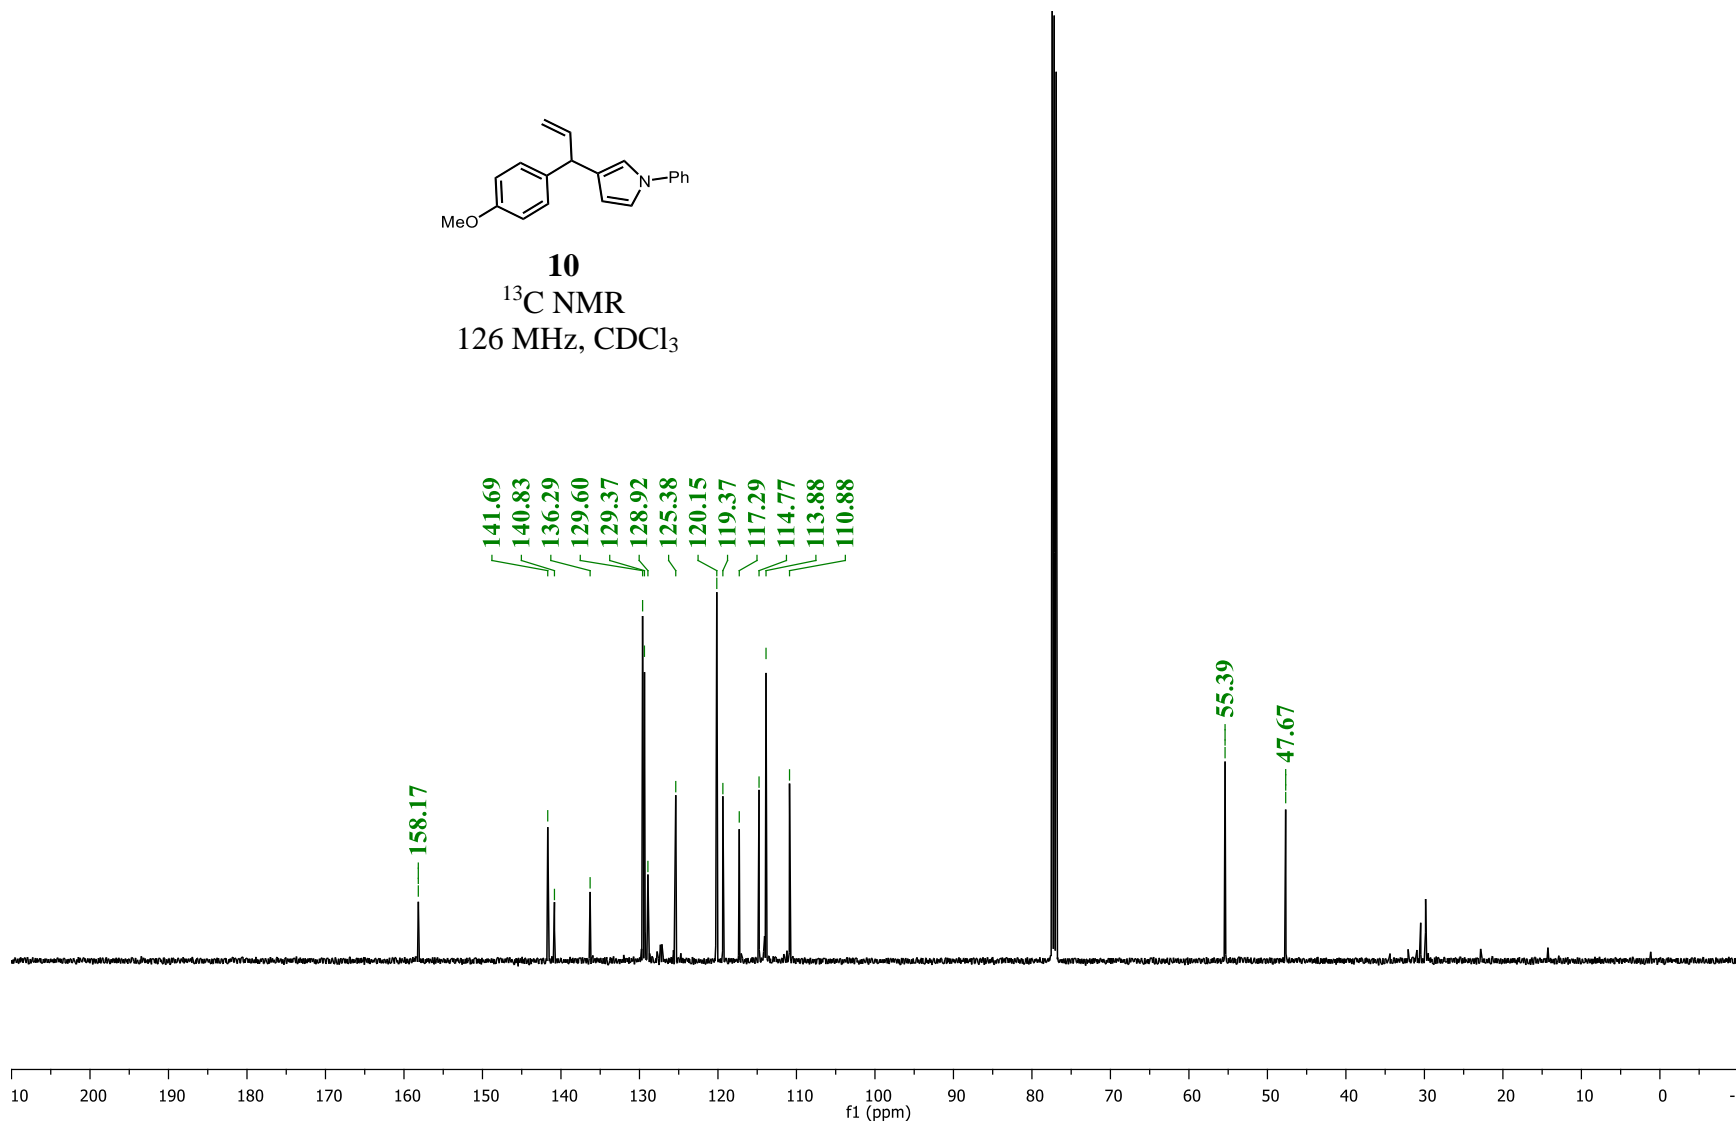

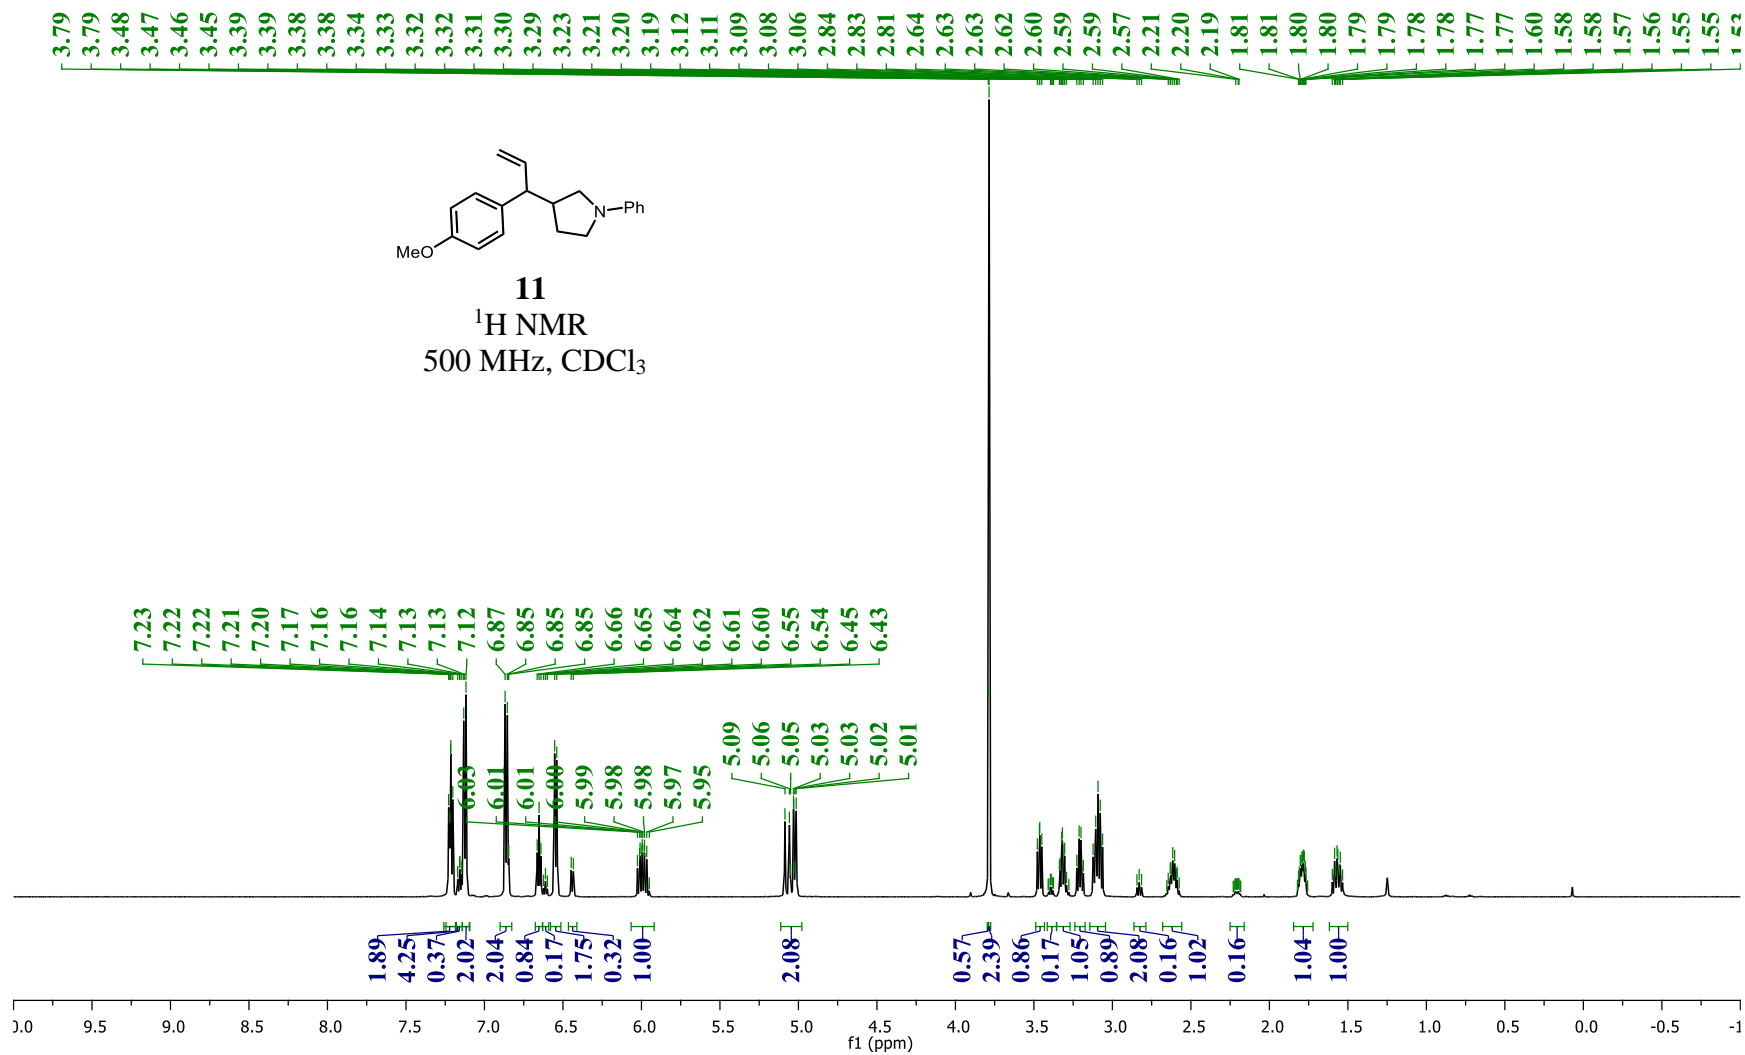

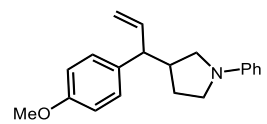

**11**  
<sup>13</sup>C NMR  
126 MHz, CDCl<sub>3</sub>

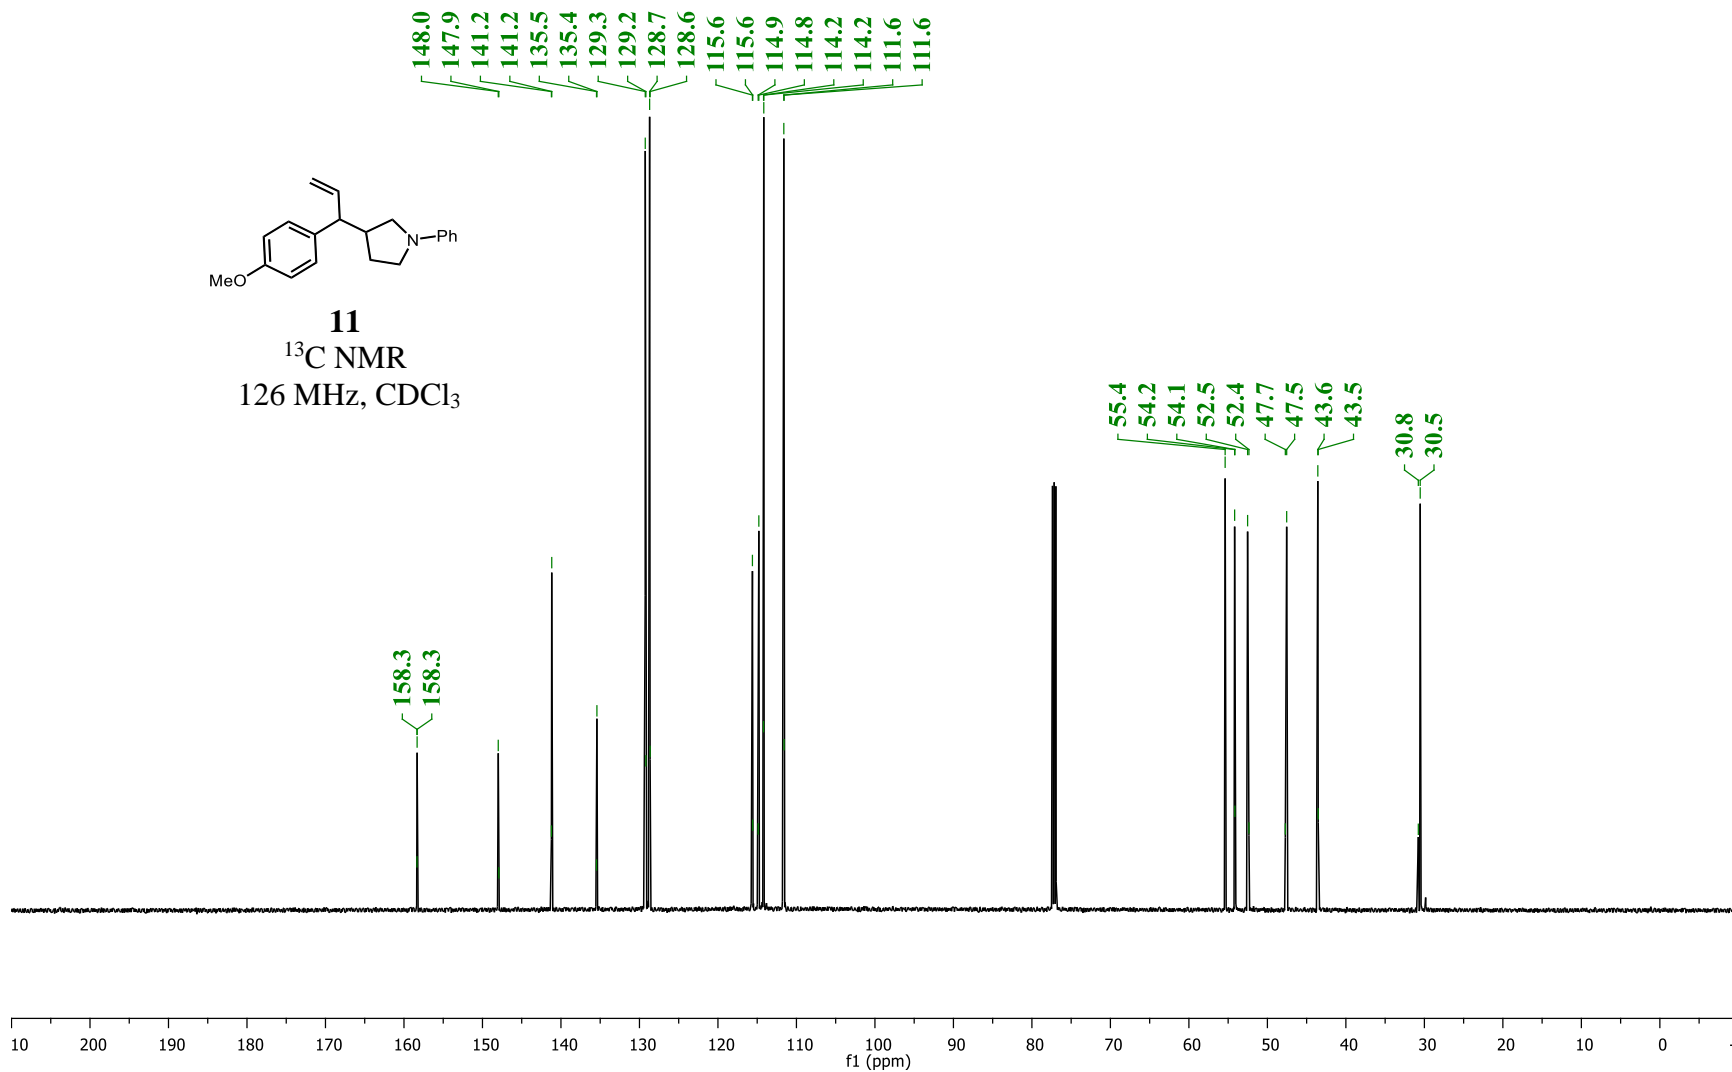

SGS-6-60 H

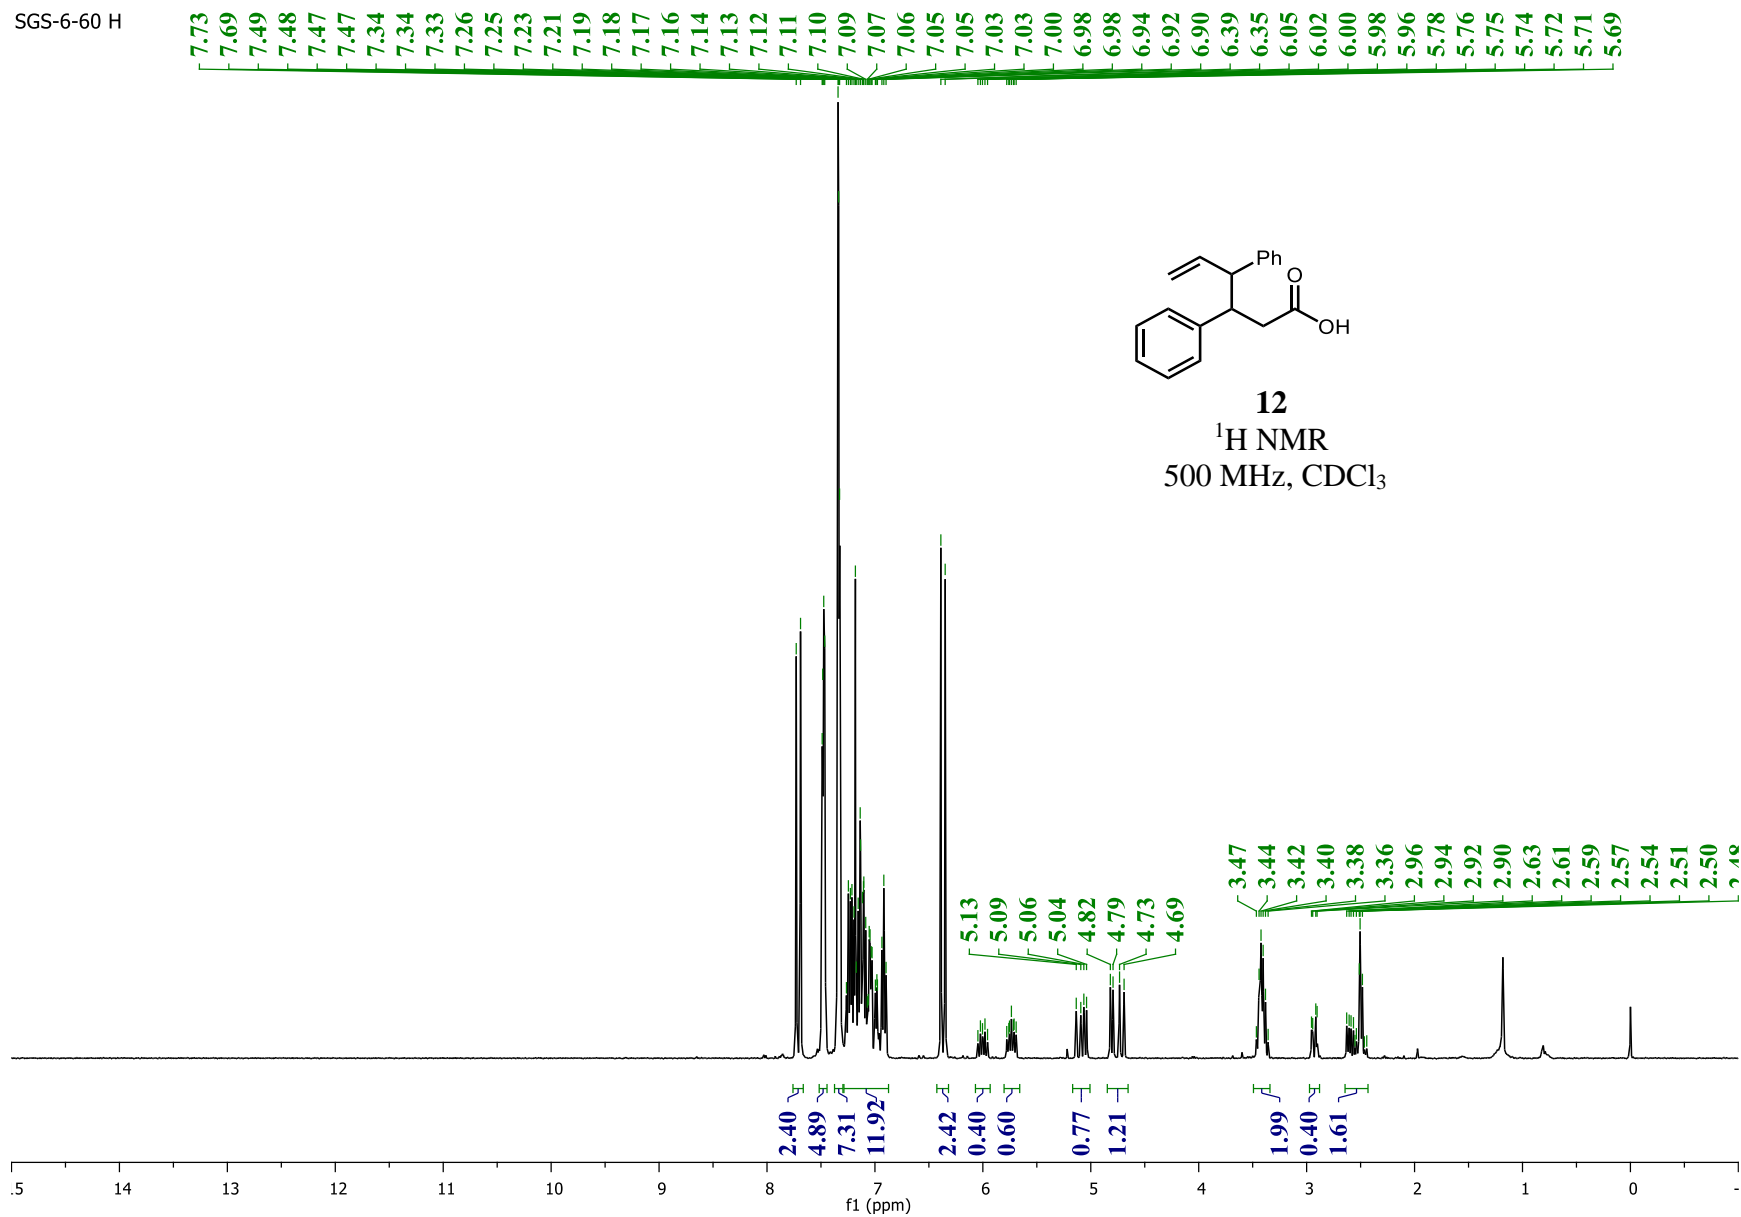

S195

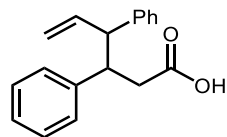

**12**  
<sup>13</sup>C NMR  
126 MHz, CDCl<sub>3</sub>

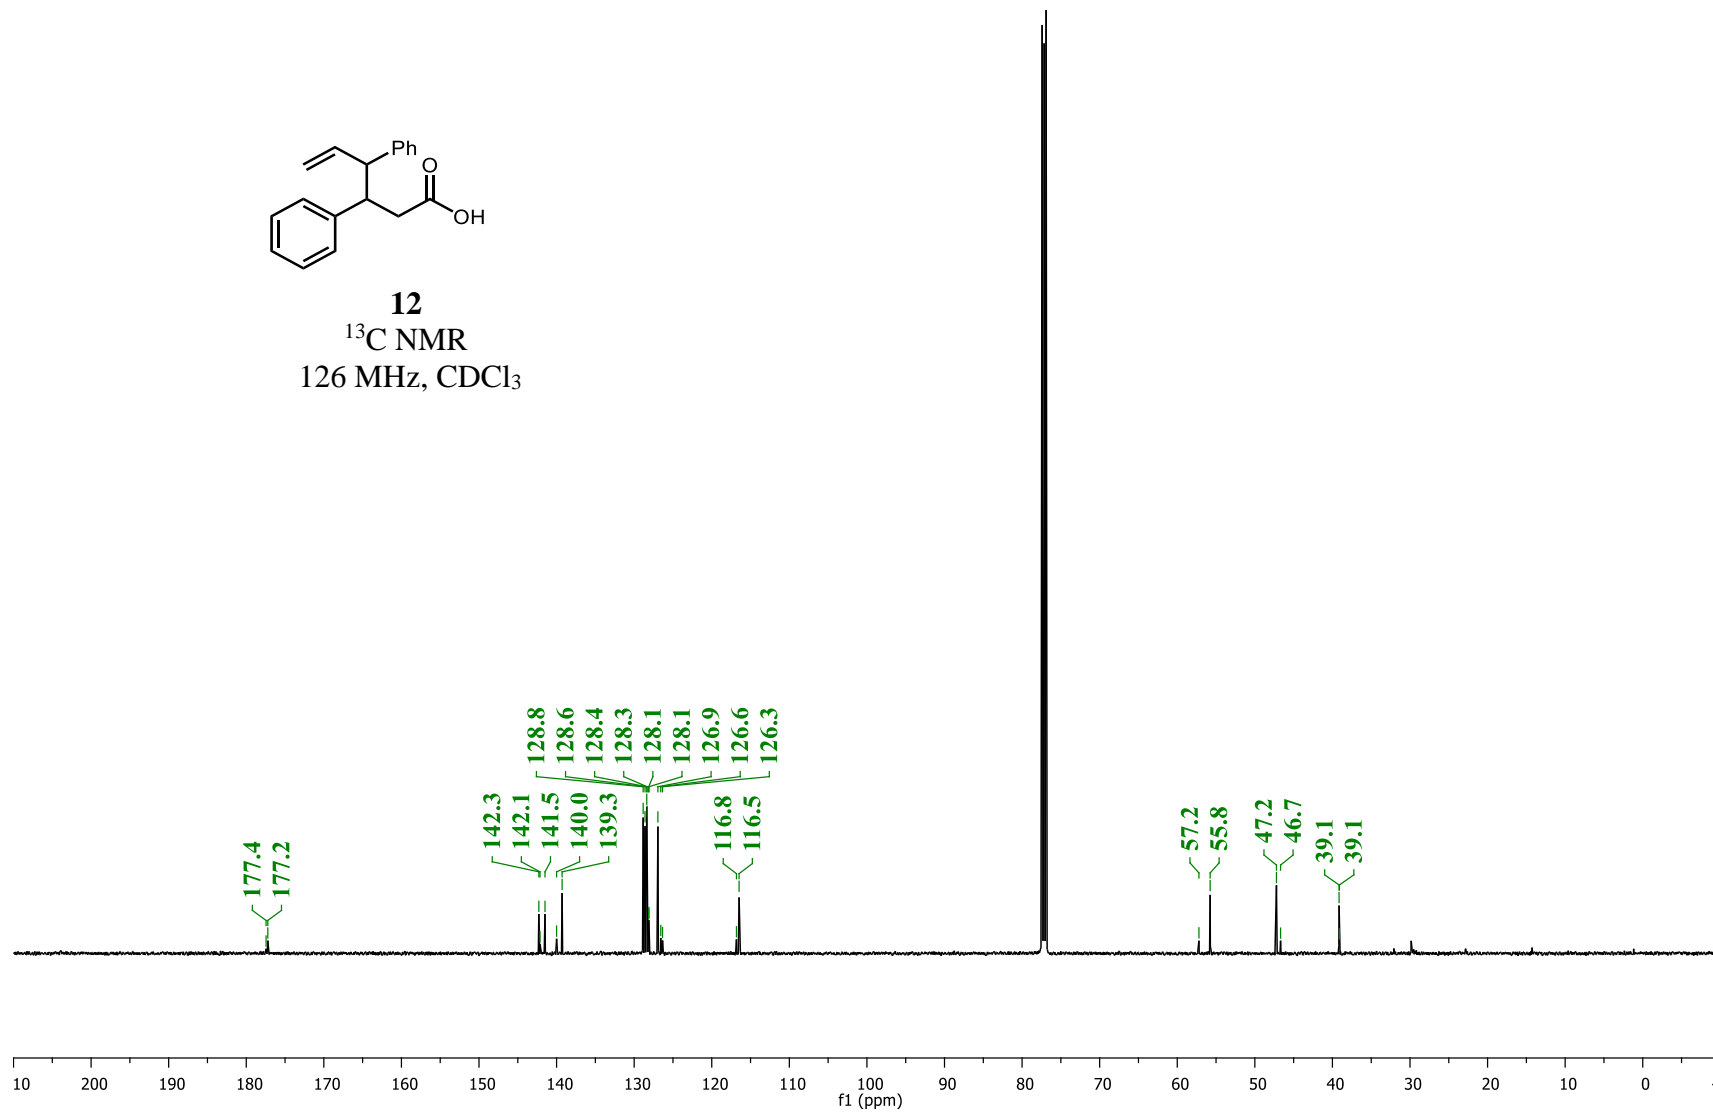



**12**  
COSY NMR – aliphatic region  
500 MHz, CDCl<sub>3</sub>

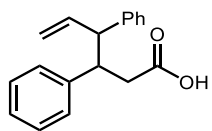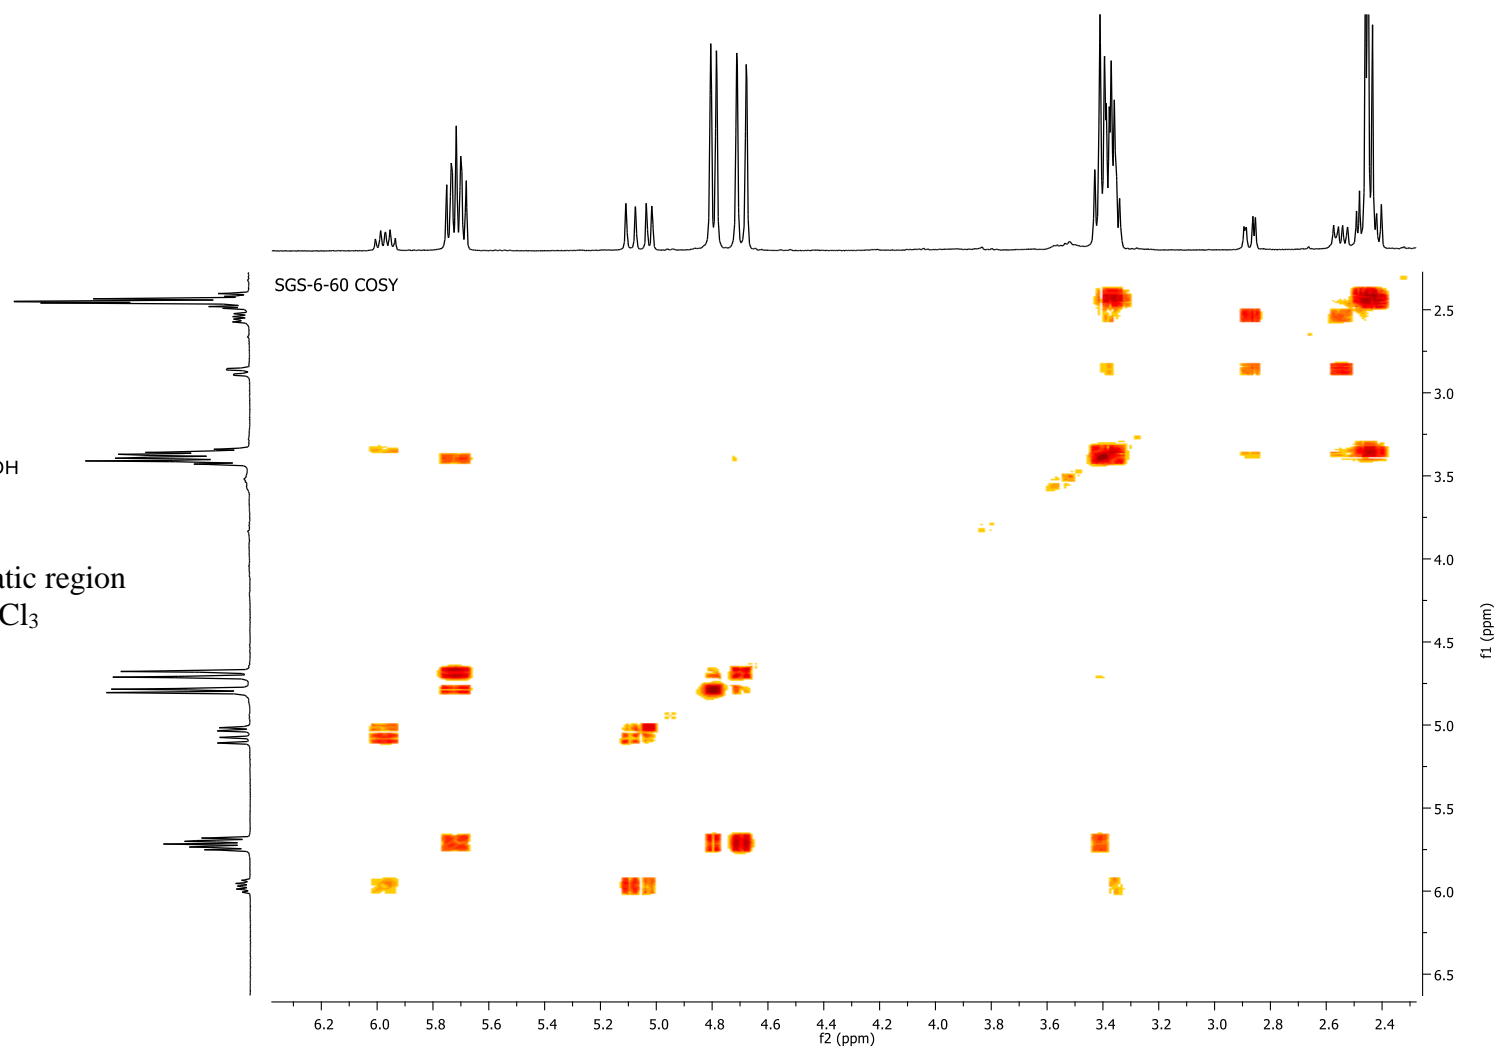

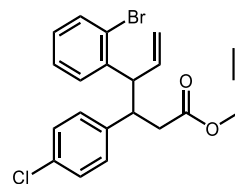

**13**  
<sup>1</sup>H NMR  
500 MHz, CDCl<sub>3</sub>

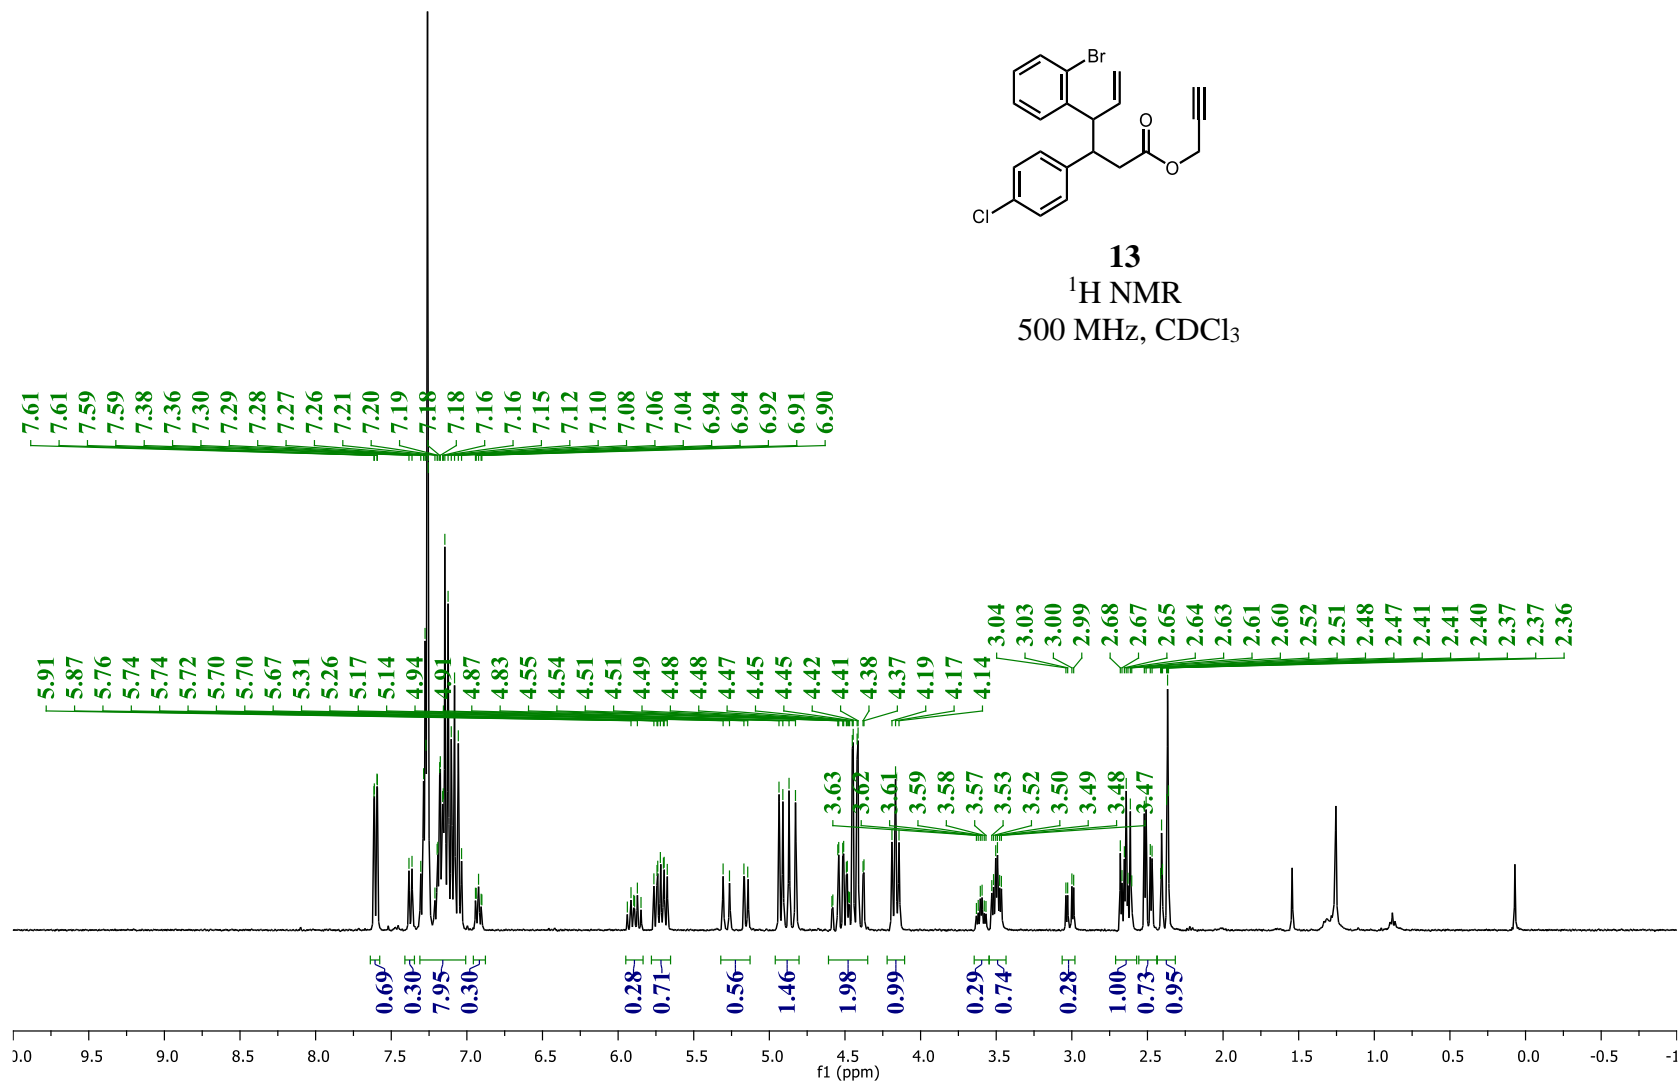

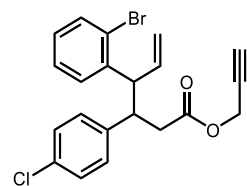

**13**  
<sup>13</sup>C NMR  
 126 MHz, CDCl<sub>3</sub>

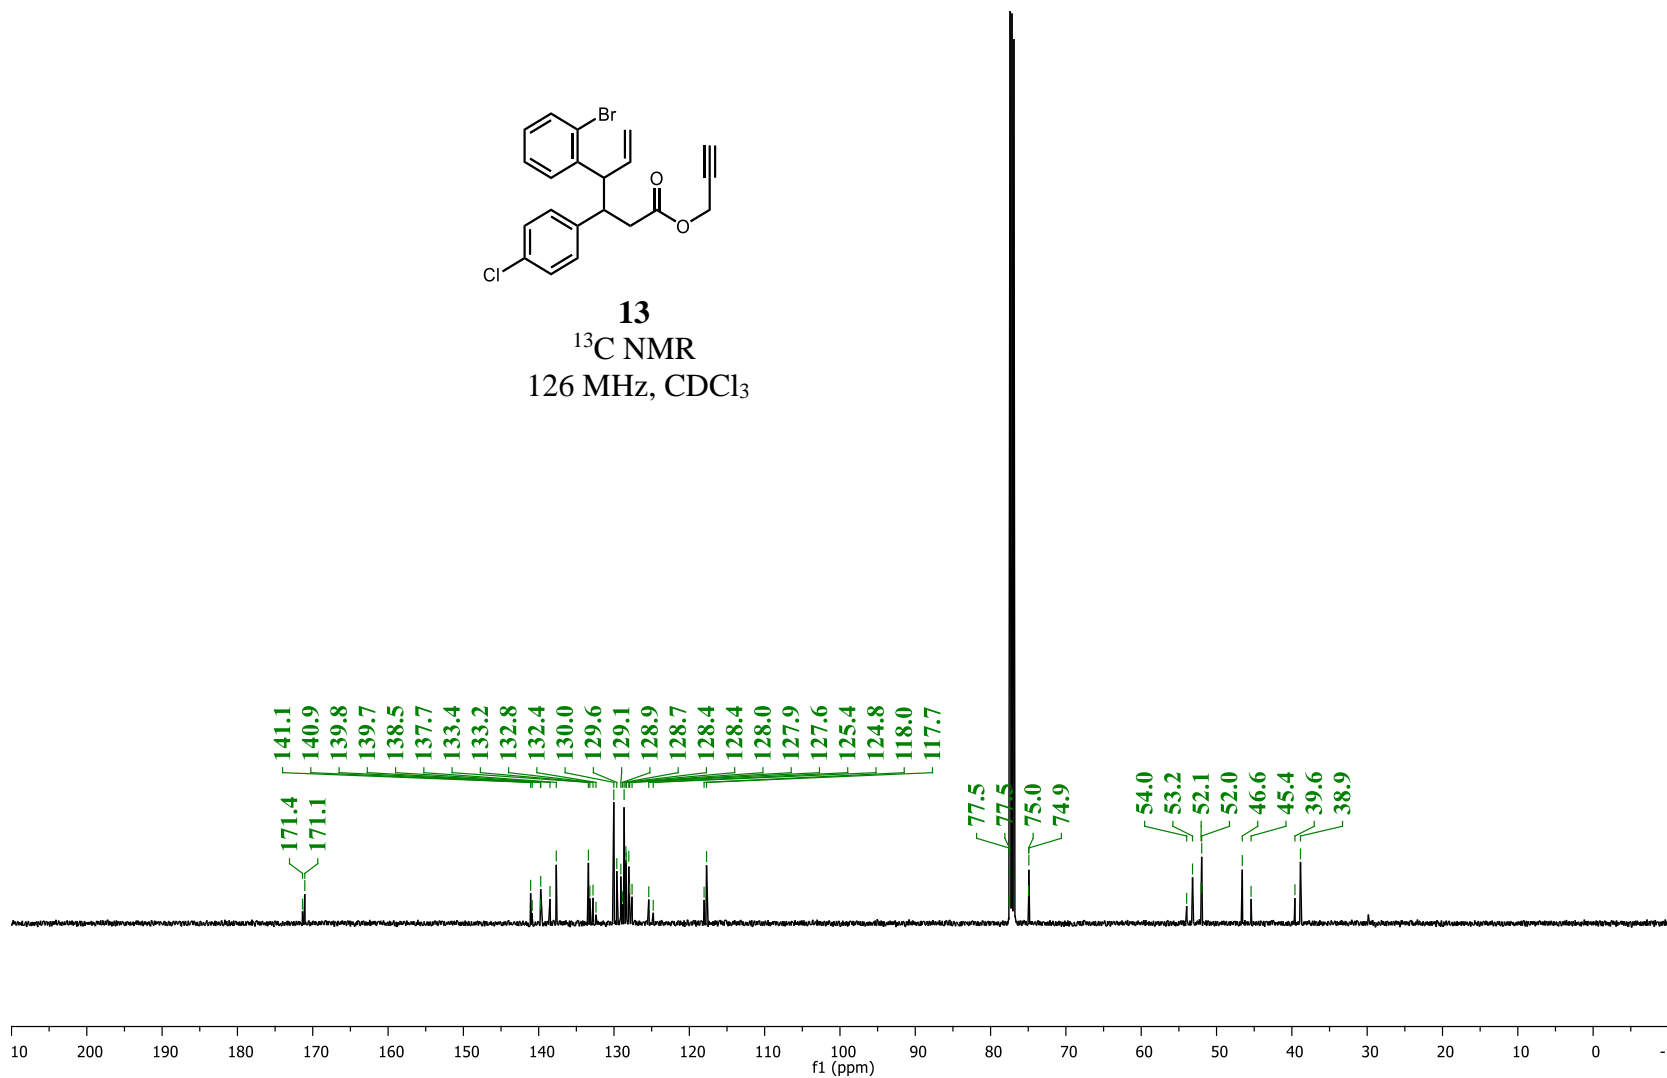

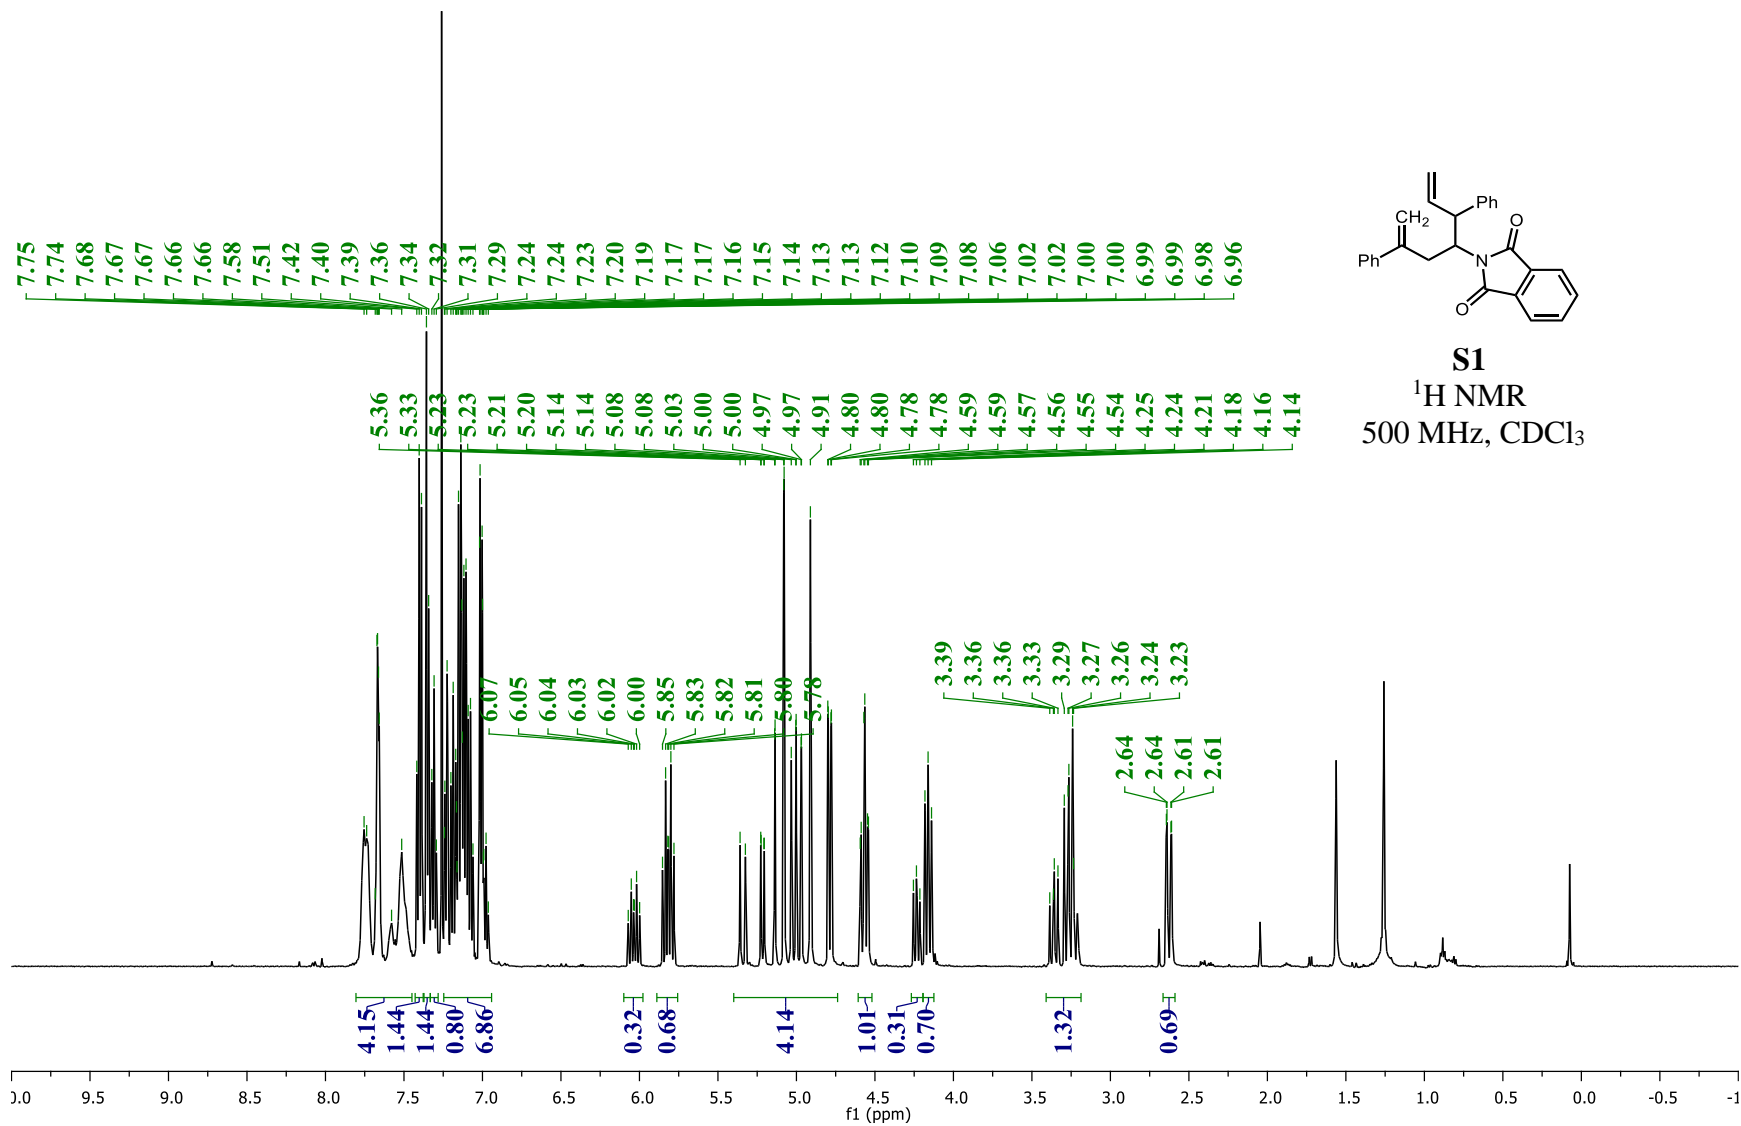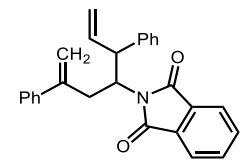

**S1**  
<sup>1</sup>H NMR  
 500 MHz, CDCl<sub>3</sub>

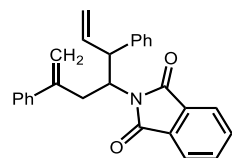

**S1**  
<sup>13</sup>C NMR  
126 MHz, CDCl<sub>3</sub>

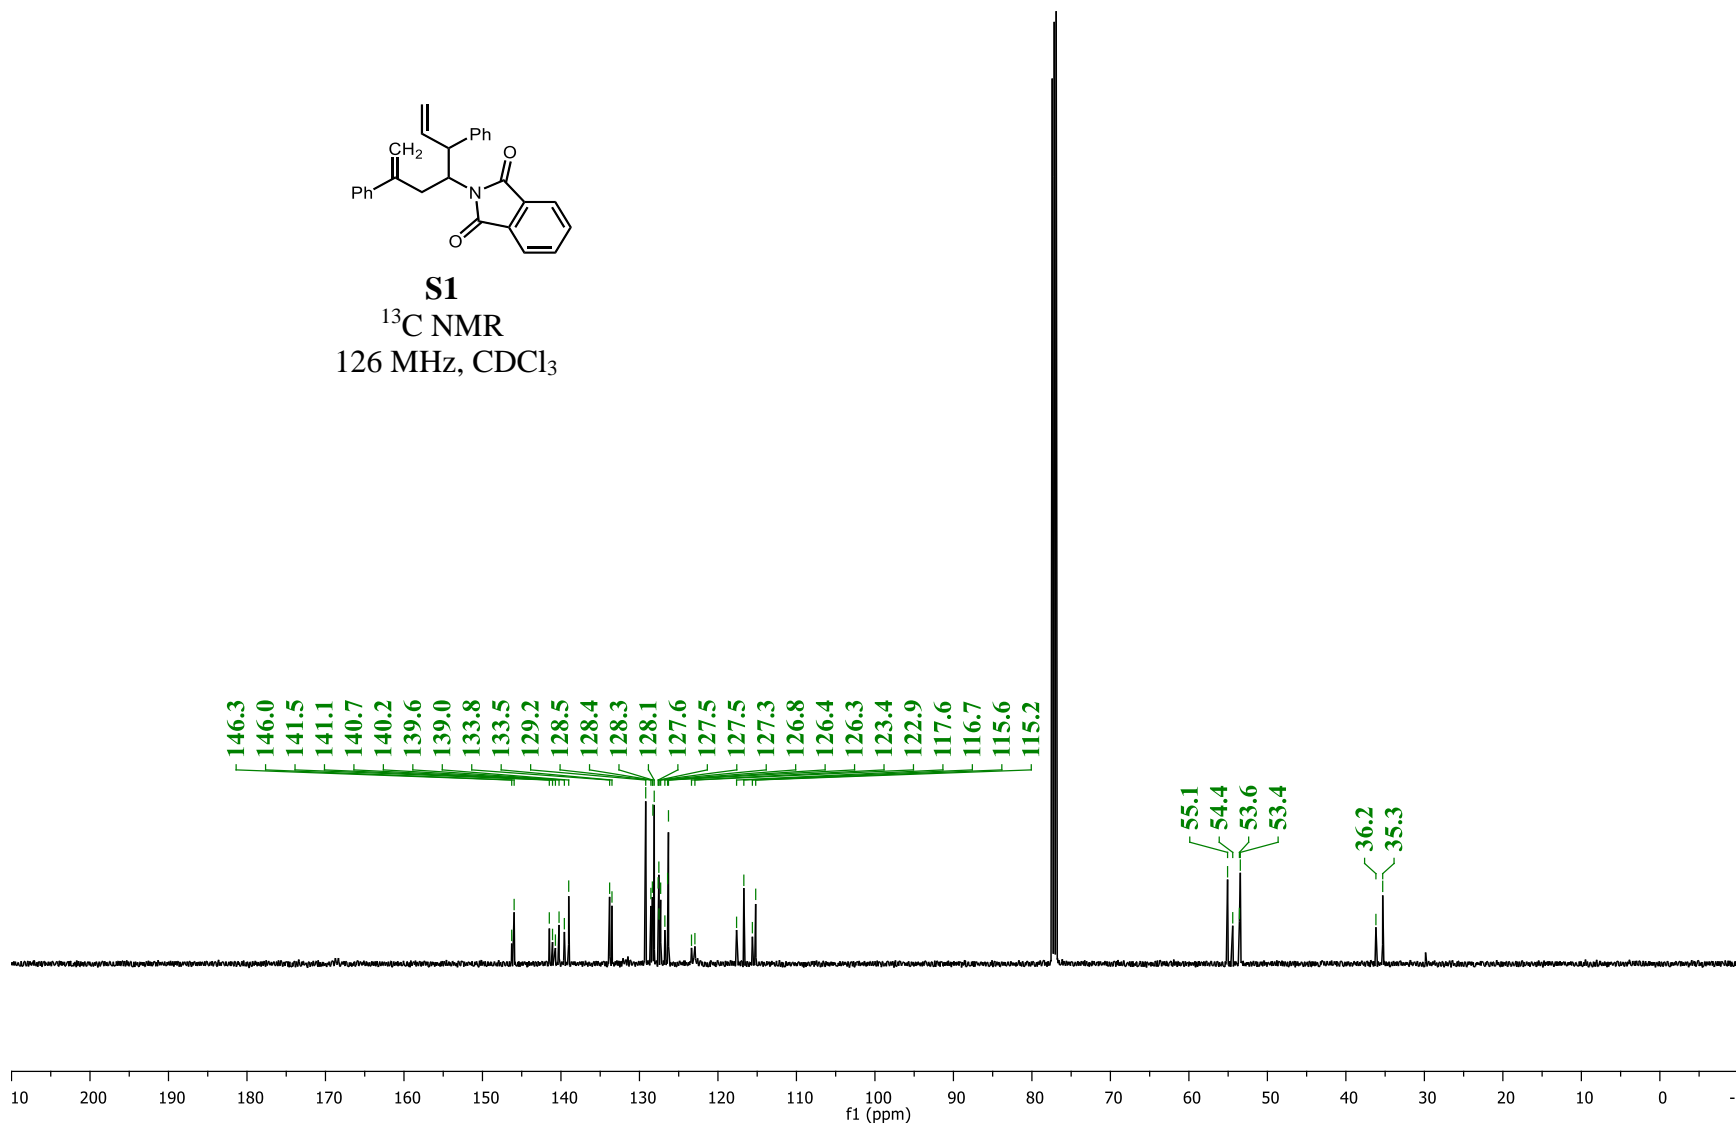

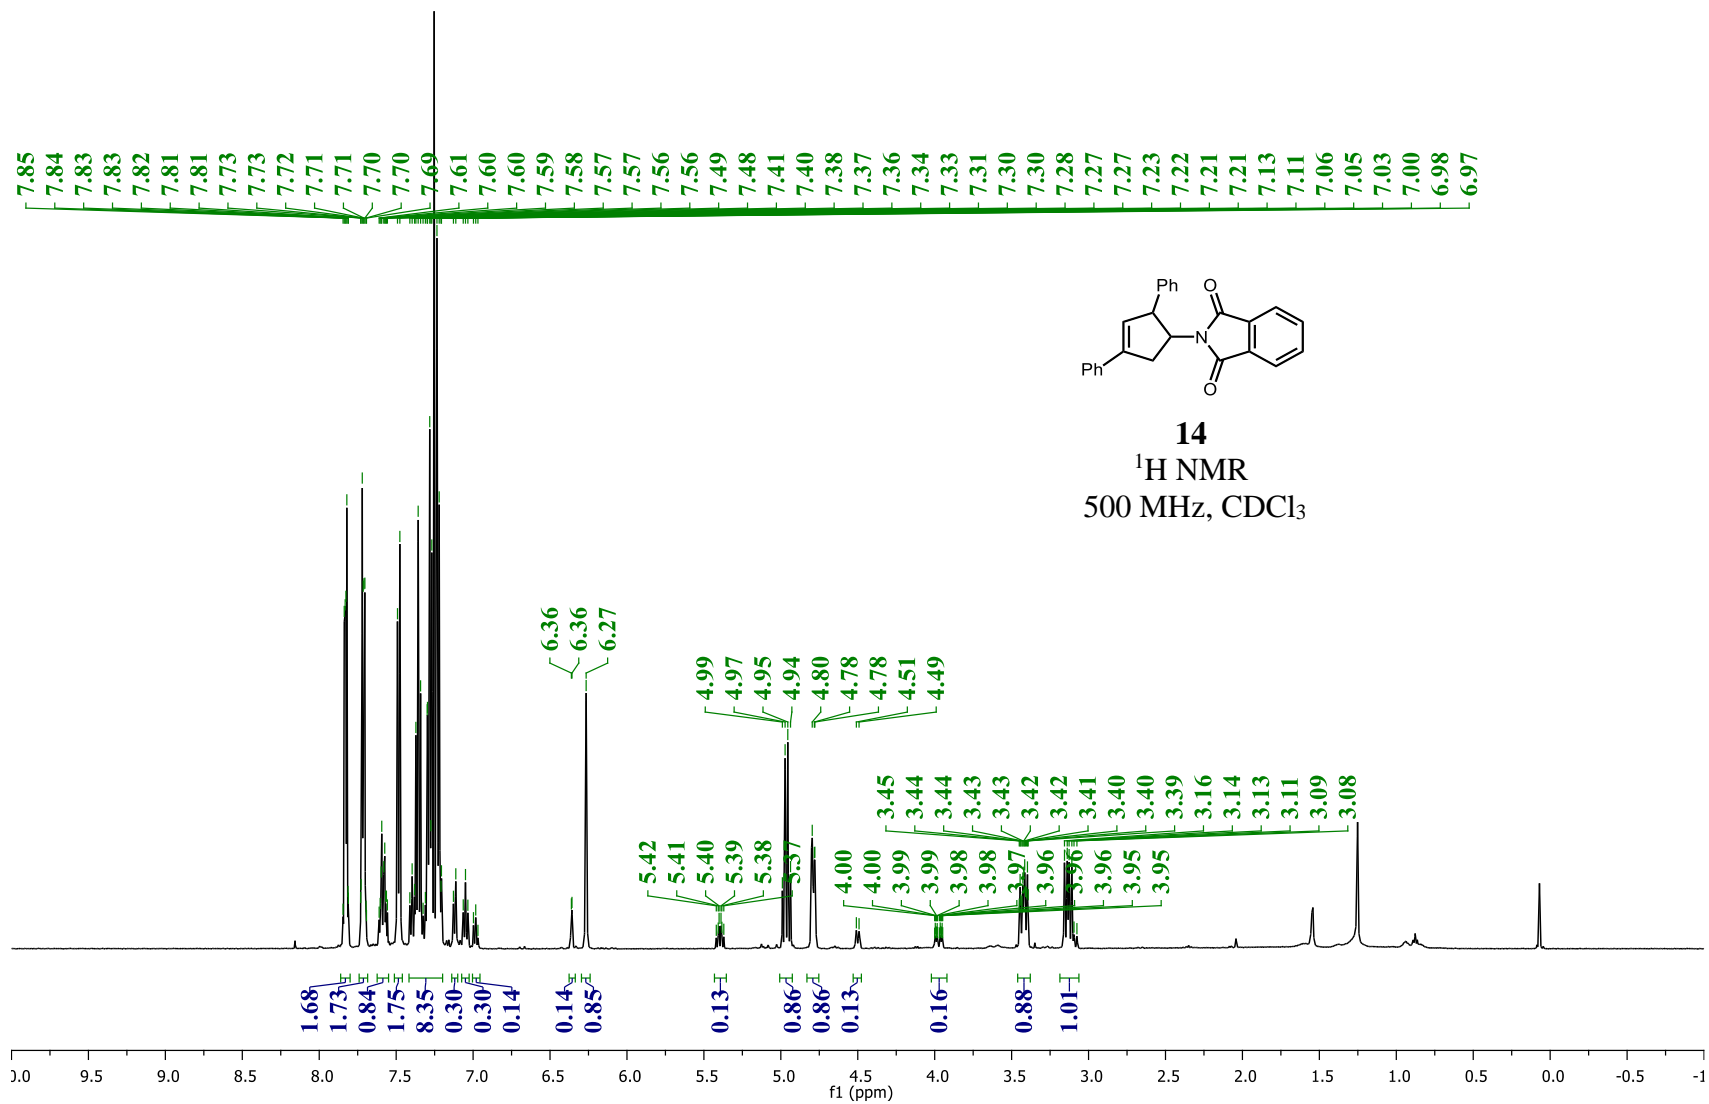



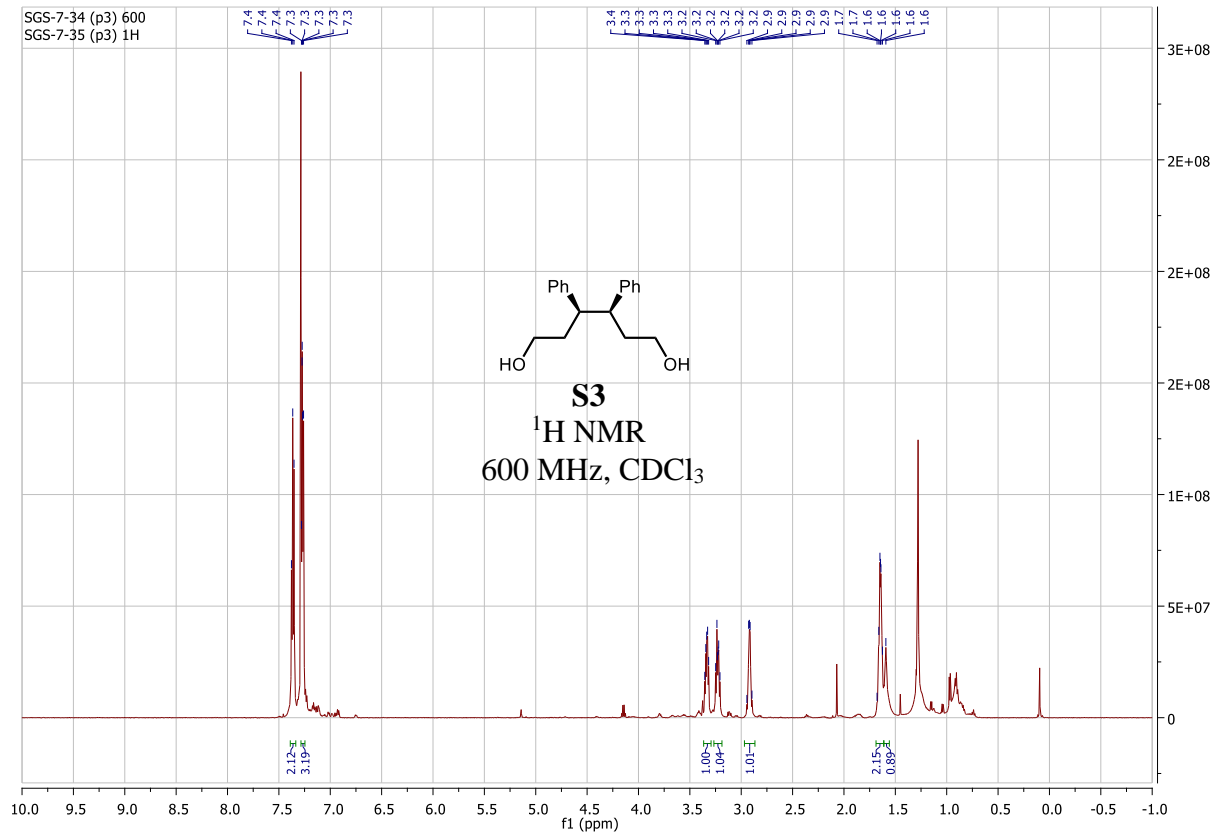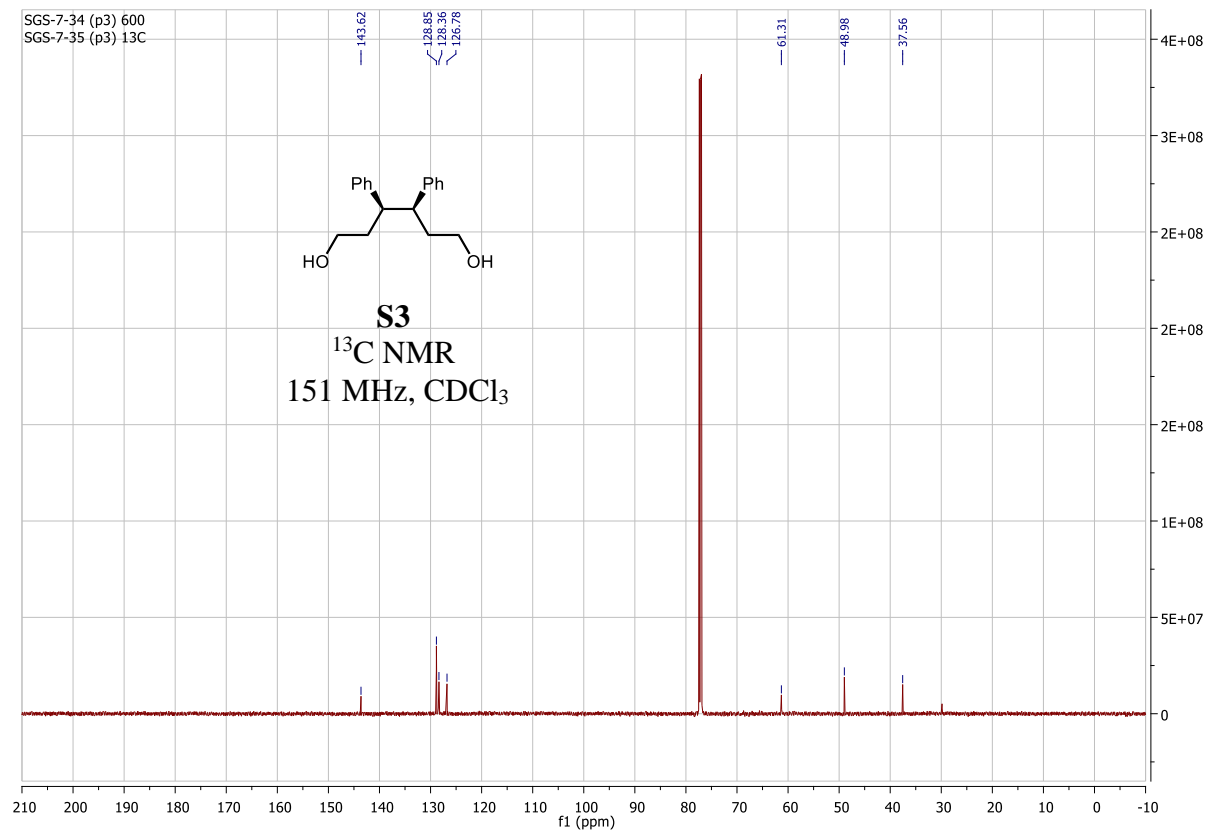



SGS-7-34 (p4) 600  
SGS-7-35 (p4) 1H

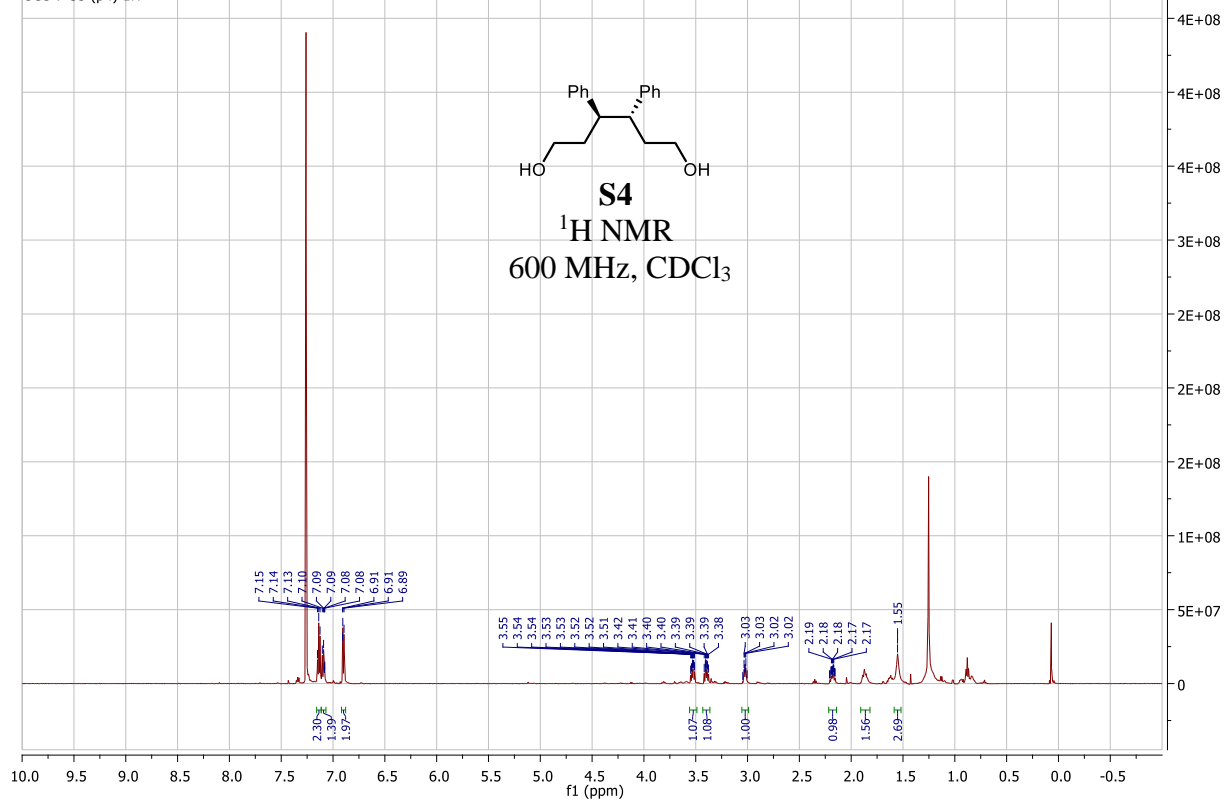

SGS-7-34 (p4) 600  
SGS-7-35 (p4) 13C

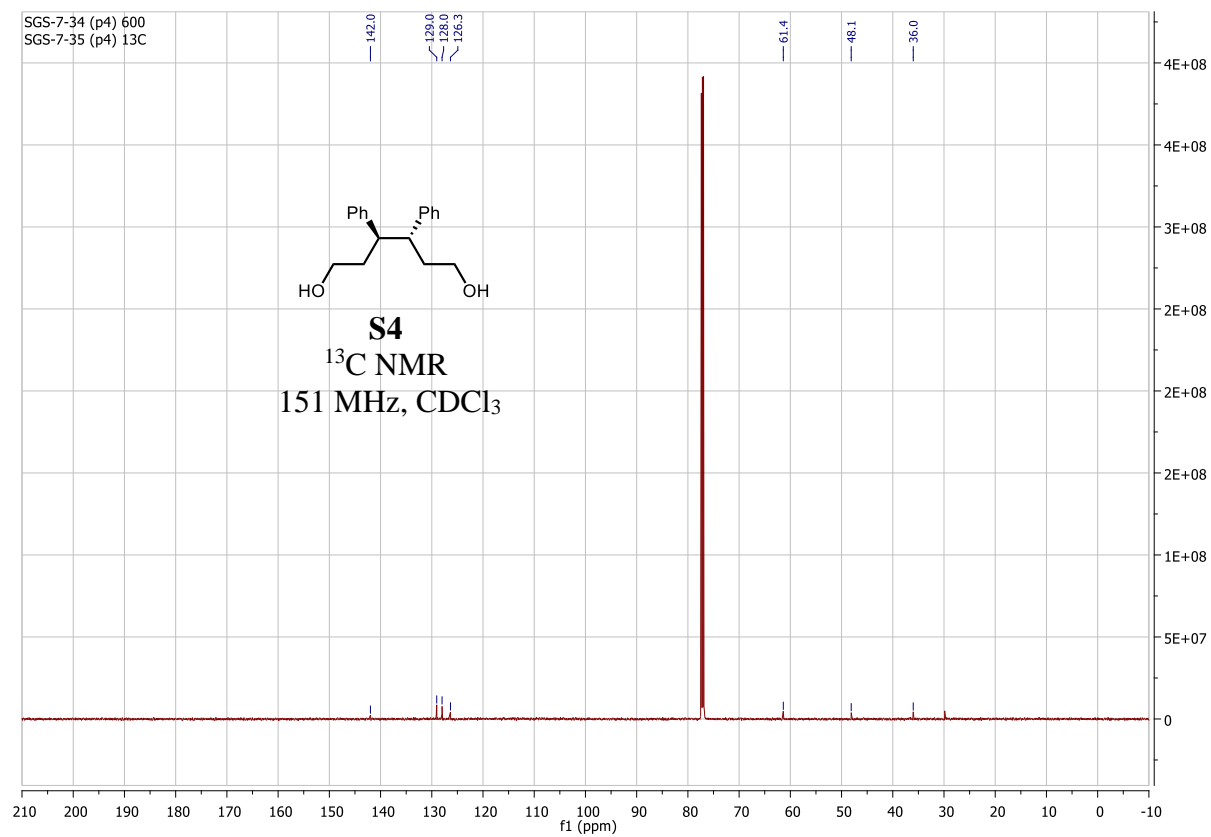

## 8. References

1. Y. Wang, J. Zhu, A. C. Durham, H. Lindberg and Y.-M. Wang, *J. Am. Chem. Soc.*, 2019, **141**, 19594-19599.
2. G. Xu, Y. Yang, Y. Yang, G. Song, S. Li, J. Zhang, W. Yang, L.-L. Wang, Z. Weng and Z. Zuo, *Eur. J. Med. Chem.*, 2020, **191**, 112115.
3. Y. He, W. Li, H. Zhou, G. Zeng, Z. Chen, J.-Y. Ge, N. Lv and J. Chen, *Adv. Synth. Catal.*, 2022, **364**, 3730-3735.
4. X. Li, X. Zhang, F. Zhang, X. Luo and H. Luo, *Adv. Synth. Catal.*, 2022, **364**, 1683-1688.
5. N. M. Nascimento-Júnior, T. C. F. Mendes, D. M. Leal, C. M. N. Corrêa, R. T. Sudo, G. Zapata-Sudo, E. J. Barreiro and C. A. M. Fraga, *Bioorg. Med. Chem. Lett.*, 2010, **20**, 74-77.
6. L. Zhao, Y. Ma, W. Duan, F. He, J. Chen and C. Song, *Org. Lett.*, 2012, **14**, 5780-5783.
7. J.-F. Wang, X. Meng, C.-H. Zhang, C.-M. Yu and B. Mao, *Org. Lett.*, 2020, **22**, 7427-7432.
8. X. Liang, X. Huang, M. Xiong, K. Shen and Y. Pan, *Chem. Commun.*, 2018, **54**, 8403-8406.
9. A. Gómez-Palomino and J. Cornella, *Angew. Chem. Int. Ed.*, 2019, **58**, 18235-18239.
10. S. G. Scrivener, Y. Wang and Y.-M. Wang, *Org. Lett.*, 2023, **25**, 1420-1424.
11. X. Qi, P. Chen and G. Liu, *Angew. Chem. Int. Ed.*, 2017, **56**, 9517-9521.
12. S.-L. Liu, Y. Li, J.-R. Guo, G.-C. Yang, X.-H. Li, J.-F. Gong and M.-P. Song, *Org. Lett.*, 2017, **19**, 4042-4045.
13. L. M. Rice, E. E. Reid and C. H. Grogan, *J. Org. Chem.*, 1954, **19**, 884-893.
14. G. L. Beutner, B. M. Cohen, A. J. DelMonte, D. D. Dixon, K. J. Fraunhoffer, A. W. Glace, E. Lo, J. M. Stevens, D. Vanyo and C. Wilbert, *Org. Process Res. Dev.*, 2019, **23**, 1378-1385.
15. J. M. Stevens, A. C. Parra-Rivera, D. D. Dixon, G. L. Beutner, A. J. DelMonte, D. E. Frantz, J. M. Janey, J. Paulson and M. R. Talley, *J. Org. Chem.*, 2018, **83**, 14245-14261.
16. Z. Zhao, L. Racicot and G. K. Murphy, *Angew. Chem. Int. Ed.*, 2017, **56**, 11620-11623.
17. A. K. Chatterjee, T.-L. Choi, D. P. Sanders and R. H. Grubbs, *J. Am. Chem. Soc.*, 2003, **125**, 11360-11370.
